# Supplementary material
Source: PubMed Central journal article supplement (PMC4550496)

Supplemental materials for: Singh GM, Micha R, Khatibzadeh S, Lim S, Ezzati M, Mozaffarian D. The global burden of disease due to sugar-sweetened beverage consumption.

**Table of Contents: Supplemental material for online publication**

**Supplemental Table 1.** Characteristics of global data sources on sugar-sweetened beverage intake in adults.....\_\_\_\_\_

**Supplemental Table 2:** SSB-attributable mortality by country, age, and sex.....\_\_\_\_\_

**Supplemental Table 3:** SSB-attributable DALYs by country, age, and sex.....\_\_\_\_\_

**Supplemental Figure 1. SSB-attributable mortality in the world’s twenty most populous countries.** Mortality is standardized per million of population as described in Figure 2. Note that y-axis scales differ in each panel.....\_\_\_\_\_

**Supplemental Table 1: Characteristics of global data sources on sugar-sweetened beverage intake in adults**

| Region*                                  | Number of surveys<br>(% nationally<br>representative) | Time period<br>of survey<br>data | Total sample<br>size | Regional adult (age<br>20+) population<br>(millions) | Dietary assessment method<br>(% of surveys in the region that assessed diet by each method) |                                 |                          |                                     |
|------------------------------------------|-------------------------------------------------------|----------------------------------|----------------------|------------------------------------------------------|---------------------------------------------------------------------------------------------|---------------------------------|--------------------------|-------------------------------------|
|                                          |                                                       |                                  |                      |                                                      | Multiple<br>dietary recalls                                                                 | Food-frequency<br>questionnaire | Single dietary<br>recall | Household<br>availability<br>survey |
| Australia and New Zealand                | 3 (100)                                               | 1995-1996                        | 21,709               | 19                                                   | 0                                                                                           | 0                               | 100                      | 0                                   |
| Central Asia/ Eastern and Central Europe | 4 (75)                                                | 1988-2006                        | 12,977               | 296                                                  | 8                                                                                           | 21                              | 0                        | 71                                  |
| East and Southeast Asia                  | 12 (80)                                               | 1995-2008                        | 302,292              | 1512                                                 | 0                                                                                           | 55                              | 45                       | 0                                   |
| High-income North America                | 2 (100)                                               | 2004-2006                        | 70,011               | 244                                                  | 100                                                                                         | 0                               | 0                        | 0                                   |
| Latin America and Caribbean              | 5 (75)                                                | 1993-2007                        | 32,282               | 364                                                  | 17                                                                                          | 50                              | 33                       | 0                                   |
| North Africa and Middle East             | 3 (67)                                                | 1990-2009                        | 76,790               | 267                                                  | 25                                                                                          | 25                              | 50                       | 0                                   |
| South Asia                               | 0 (0)                                                 | ---                              | ---                  | 935                                                  | ---                                                                                         | ---                             | ---                      | ---                                 |
| Sub-Saharan Africa                       | 1 (100)                                               | 1995                             | 1,502                | 400                                                  | 0                                                                                           | 100                             | 0                        | 0                                   |
| Western Europe                           | 32 (91)                                               | 1981-2009                        | 94,408               | 317                                                  | 18                                                                                          | 11                              | 14                       | 57                                  |
| <b>Overall</b>                           | <b>62 (88)</b>                                        | <b>1981-2009</b>                 | <b>611,971</b>       | <b>4353</b>                                          | <b>16</b>                                                                                   | <b>20</b>                       | <b>17</b>                | <b>47</b>                           |

\*Countries in each region are as follows:

Australia/New Zealand: Australia, New Zealand.

East/Central Eurasia: Albania, Armenia, Azerbaijan, Bulgaria, Bosnia and Herzegovina, Belarus, Czech Republic, Estonia, Georgia, Croatia, Hungary, Kazakhstan, Kyrgyzstan, Lithuania, Latvia, Moldova, Macedonia, Montenegro, Mongolia, Poland, Romania, Russian Federation, Serbia, Slovakia, Slovenia, Tajikistan, Turkmenistan, Ukraine, Uzbekistan

East/Southeast Asia: Brunei Darussalam, China, Fiji, Micronesia, Indonesia, Japan, Cambodia, Kiribati, Republic of Korea, Lao People's Democratic Republic, Sri Lanka, Maldives, Marshall Islands, Myanmar, Malaysia, Philippines, Papua New Guinea, Democratic People's Republic of Korea, Singapore, Solomon Islands, Thailand, Timor-Leste, Tonga, Taiwan, Viet Nam, Vanuatu, Samoa.

Latin America/Caribbean: Argentina, Antigua and Barbuda, Bahamas, Belize, Bolivia, Brazil, Barbados, Chile, Colombia, Costa Rica, Cuba, Dominica, Dominican Republic, Ecuador, Grenada, Guatemala, Guyana, Honduras, Haiti, Jamaica, Saint Lucia, Mexico, Nicaragua, Panama, Peru, Paraguay, El Salvador, Suriname, Trinidad and Tobago, Uruguay, Saint Vincent and the Grenadines, Venezuela.

North Africa/Middle East: United Arab Emirates, Bahrain, Algeria, Egypt, Iran, Iraq, Jordan, Kuwait, Lebanon, Libyan Arab Jamahiriya, Morocco, Oman, Occupied Palestinian Territory, Qatar, Saudi Arabia, Syrian Arab Republic, South Asia: Afghanistan, Bangladesh, Bhutan, India, Nepal, Pakistan.

Sub-Saharan Africa: Angola, Burundi, Benin, Burkina Faso, Botswana, Central African Republic, Côte d'Ivoire, Cameroon, Democratic Republic of the Congo, Congo, Comoros, Cape Verde, Djibouti, Eritrea, Ethiopia, Gabon, Ghana, Guinea, Gambia, Guinea-Bissau, Equatorial Guinea, Kenya, Liberia, Lesotho, Madagascar, Mali, Mozambique, Mauritania, Mauritius, Malawi, Namibia, Niger, Nigeria, Rwanda, Sudan, Senegal, Sierra Leone, Somalia, São Tomé and Príncipe, Swaziland, Seychelles, Chad, Togo, United Republic of Tanzania, Uganda, South Africa, Zambia, Zimbabwe.

Western Europe: Andorra, Austria, Belgium, Switzerland, Cyprus, Germany, Denmark, Spain, Finland, France, United Kingdom, Greece, Ireland, Iceland, Israel, Italy, Luxembourg, Malta, Netherlands, Norway, Portugal, Sweden.

Supplemental Table 2. Deaths attributable to SSB consumption in 2010 by country, age, and sex

| Country             | Sex   | Age               | Population characteristics |                          |                               | Number of deaths attributable to SSBs (95% UI) |                 |            |                   | Deaths per million adults attributable to SSBs (95% UI) |                |            |                | Proportion of deaths attributable to SSBs (95% UI) |                   |                |                 |
|---------------------|-------|-------------------|----------------------------|--------------------------|-------------------------------|------------------------------------------------|-----------------|------------|-------------------|---------------------------------------------------------|----------------|------------|----------------|----------------------------------------------------|-------------------|----------------|-----------------|
|                     |       |                   | Population (millions)      | Mean SSBs (servings/day) | Mean BMI (kg/m <sup>2</sup> ) | CVD                                            | Diabetes        | Cancers    | Total             | CVD                                                     | Diabetes       | Cancers    | Total          | CVD                                                | Diabetes          | Cancers        | Total           |
| Afghanistan         | Women | Ages 20 to 44     | 1.99                       | 0.4 (0.2, 0.7)           | 21 (17, 25)                   | 11 (6, 17)                                     | 44 (23, 65)     | 1 (0, 2)   | 56 (35, 78)       | 3 (2, 5)                                                | 13 (7, 20)     | 0 (0, 0)   | 17 (11, 24)    | 0.4 (0.2, 0.7)                                     | 5.9 (3.1, 8.8)    | 0.1 (0.1, 0.2) | 1.4 (0.9, 1.9)  |
| Afghanistan         | Women | Ages 45 to 64     | 1.38                       | 0.2 (0.1, 0.4)           | 22 (18, 25)                   | 38 (20, 59)                                    | 166 (111, 220)  | 2 (1, 3)   | 206 (143, 266)    | 28 (14, 43)                                             | 120 (80, 159)  | 1 (1, 2)   | 149 (103, 193) | 0.4 (0.2, 0.6)                                     | 6.5 (4.4, 8.6)    | 0.2 (0.1, 0.3) | 1.6 (1.1, 2.1)  |
| Afghanistan         | Women | Ages 65 and older | 1.67                       | 0.2 (0.1, 0.3)           | 21 (15, 26)                   | 22 (11, 34)                                    | 92 (49, 134)    | 1 (0, 1)   | 115 (67, 162)     | 61 (31, 94)                                             | 255 (135, 371) | 2 (1, 4)   | 319 (185, 449) | 0.2 (0.1, 0.2)                                     | 2.8 (1.5, 4.1)    | 0.1 (0.1, 0.2) | 0.6 (0.4, 0.9)  |
| Afghanistan         | Women | Overall           | 5.05                       | 0.3 (0.1, 0.5)           | 21 (17, 25)                   | 72 (37, 109)                                   | 302 (228, 372)  | 4 (2, 6)   | 377 (289, 463)    | 14 (7, 22)                                              | 60 (45, 74)    | 1 (0, 1)   | 75 (57, 92)    | 0.3 (0.1, 0.4)                                     | 4.6 (3.5, 5.7)    | 0.2 (0.1, 0.2) | 1.1 (0.8, 1.3)  |
| Afghanistan         | Men   | Ages 20 to 44     | 2.17                       | 0.5 (0.2, 0.8)           | 21 (18, 23)                   | 7 (3, 11)                                      | 22 (12, 32)     | 0 (0, 0)   | 29 (18, 40)       | 2 (1, 3)                                                | 6 (3, 9)       | 0 (0, 0)   | 8 (5, 11)      | 0.5 (0.2, 0.8)                                     | 6.0 (3.2, 8.7)    | 0.1 (0.0, 0.2) | 1.6 (1.0, 2.2)  |
| Afghanistan         | Men   | Ages 45 to 64     | 1.48                       | 0.2 (0.1, 0.4)           | 21 (18, 24)                   | 0 (0, 0)                                       | 0 (0, 0)        | 0 (0, 0)   | 0 (0, 0)          | 0 (0, 0)                                                | 0 (0, 0)       | 0 (0, 0)   | 0 (0, 0)       | 0.0 (0.0, 0.0)                                     | 0.0 (0.0, 0.0)    | 0.0 (0.0, 0.0) | 0.0 (0.0, 0.0)  |
| Afghanistan         | Men   | Ages 65 and older | 1.78                       | 0.2 (0.1, 0.3)           | 20 (17, 24)                   | 0 (0, 0)                                       | 0 (0, 0)        | 0 (0, 0)   | 0 (0, 0)          | 0 (0, 0)                                                | 0 (0, 0)       | 0 (0, 0)   | 0 (0, 0)       | 0.0 (0.0, 0.0)                                     | 0.0 (0.0, 0.0)    | 0.0 (0.0, 0.0) | 0.0 (0.0, 0.0)  |
| Afghanistan         | Men   | Overall           | 5.43                       | 0.3 (0.1, 0.5)           | 20 (18, 23)                   | 7 (3, 11)                                      | 22 (12, 32)     | 0 (0, 0)   | 29 (18, 40)       | 1 (1, 2)                                                | 4 (2, 6)       | 0 (0, 0)   | 5 (3, 7)       | 0.0 (0.0, 0.1)                                     | 0.5 (0.3, 0.8)    | 0.0 (0.0, 0.0) | 0.1 (0.1, 0.2)  |
| Afghanistan         | Both  | Overall           | 10.5                       | 0.3 (0.1, 0.5)           | 21 (17, 24)                   | 78 (40, 120)                                   | 324 (248, 395)  | 4 (2, 6)   | 406 (312, 494)    | 7 (4, 11)                                               | 31 (24, 38)    | 0 (0, 1)   | 39 (30, 47)    | 0.2 (0.1, 0.3)                                     | 3.1 (2.4, 3.8)    | 0.1 (0.1, 0.2) | 0.7 (0.5, 0.8)  |
| Albania             | Women | Ages 20 to 44     | 0.25                       | 0.4 (0.1, 0.6)           | 24 (22, 26)                   | 0 (0, 1)                                       | 1 (0, 1)        | 0 (0, 0)   | 1 (1, 2)          | 1 (1, 1)                                                | 1 (1, 2)       | 0 (0, 0)   | 3 (2, 3)       | 1.1 (0.7, 1.5)                                     | 10.8 (7.6, 13.8)  | 0.3 (0.2, 0.4) | 1.2 (0.9, 1.5)  |
| Albania             | Women | Ages 45 to 64     | 0.334                      | 0.2 (0.1, 0.3)           | 27 (25, 30)                   | 2 (1, 3)                                       | 2 (1, 3)        | 1 (0, 1)   | 5 (4, 7)          | 7 (4, 10)                                               | 6 (4, 8)       | 2 (1, 2)   | 15 (11, 20)    | 0.8 (0.5, 1.1)                                     | 6.2 (4.2, 8.2)    | 0.3 (0.2, 0.4) | 0.9 (0.6, 1.1)  |
| Albania             | Women | Ages 65 and older | 0.376                      | 0.1 (0.0, 0.2)           | 27 (25, 30)                   | 10 (6, 14)                                     | 6 (4, 7)        | 1 (0, 1)   | 16 (11, 21)       | 59 (34, 87)                                             | 34 (25, 44)    | 4 (2, 5)   | 97 (68, 128)   | 0.4 (0.2, 0.5)                                     | 3.4 (2.5, 4.4)    | 0.3 (0.2, 0.4) | 0.5 (0.3, 0.7)  |
| Albania             | Women | Overall           | 0.959                      | 0.2 (0.1, 0.4)           | 26 (24, 29)                   | 13 (8, 18)                                     | 8 (7, 10)       | 1 (1, 2)   | 22 (16, 29)       | 13 (8, 19)                                              | 9 (7, 11)      | 1 (1, 2)   | 23 (17, 30)    | 0.4 (0.3, 0.6)                                     | 4.1 (3.2, 5.0)    | 0.3 (0.2, 0.4) | 0.6 (0.4, 0.7)  |
| Albania             | Men   | Ages 20 to 44     | 0.234                      | 0.4 (0.1, 0.7)           | 26 (24, 28)                   | 1 (1, 2)                                       | 1 (1, 1)        | 0 (0, 0)   | 2 (2, 3)          | 3 (2, 5)                                                | 2 (2, 3)       | 0 (0, 0)   | 6 (4, 7)       | 1.4 (0.9, 2.0)                                     | 12.0 (8.7, 15.1)  | 0.3 (0.1, 0.4) | 1.9 (1.4, 2.4)  |
| Albania             | Men   | Ages 45 to 64     | 0.342                      | 0.2 (0.1, 0.3)           | 28 (26, 30)                   | 7 (4, 10)                                      | 4 (2, 5)        | 0 (0, 1)   | 11 (8, 14)        | 20 (12, 29)                                             | 10 (7, 14)     | 1 (1, 2)   | 32 (22, 41)    | 0.8 (0.5, 1.2)                                     | 6.4 (4.3, 8.5)    | 0.2 (0.1, 0.4) | 1.0 (0.7, 1.3)  |
| Albania             | Men   | Ages 65 and older | 0.342                      | 0.1 (0.0, 0.2)           | 26 (25, 28)                   | 12 (7, 18)                                     | 6 (4, 7)        | 1 (0, 1)   | 18 (12, 24)       | 84 (49, 122)                                            | 38 (26, 50)    | 4 (2, 6)   | 126 (86, 168)  | 0.4 (0.3, 0.6)                                     | 3.9 (2.6, 5.0)    | 0.2 (0.1, 0.3) | 0.5 (0.4, 0.7)  |
| Albania             | Men   | Overall           | 0.917                      | 0.3 (0.1, 0.4)           | 26 (25, 28)                   | 20 (12, 29)                                    | 10 (8, 12)      | 1 (1, 1)   | 32 (22, 41)       | 22 (14, 32)                                             | 11 (9, 13)     | 1 (1, 2)   | 35 (24, 45)    | 0.5 (0.3, 0.8)                                     | 4.9 (3.9, 5.9)    | 0.2 (0.1, 0.3) | 0.7 (0.5, 0.9)  |
| Albania             | Both  | Overall           | 1.88                       | 0.2 (0.1, 0.4)           | 26 (24, 29)                   | 33 (20, 47)                                    | 19 (16, 21)     | 2 (1, 3)   | 54 (38, 70)       | 18 (11, 25)                                             | 10 (8, 11)     | 1 (1, 2)   | 29 (20, 37)    | 0.5 (0.3, 0.7)                                     | 4.5 (3.8, 5.2)    | 0.3 (0.2, 0.4) | 0.6 (0.5, 0.8)  |
| Algeria             | Women | Ages 20 to 44     | 3.33                       | 0.5 (0.1, 0.9)           | 26 (24, 27)                   | 11 (6, 16)                                     | 80 (59, 100)    | 2 (1, 3)   | 93 (71, 115)      | 2 (1, 3)                                                | 14 (10, 17)    | 0 (0, 1)   | 16 (12, 20)    | 1.8 (1.0, 2.6)                                     | 13.5 (9.9, 16.8)  | 0.5 (0.3, 0.7) | 5.9 (4.5, 7.3)  |
| Algeria             | Women | Ages 45 to 64     | 2.66                       | 0.3 (0.1, 0.5)           | 28 (26, 30)                   | 32 (19, 46)                                    | 152 (105, 198)  | 4 (2, 6)   | 188 (138, 239)    | 12 (7, 17)                                              | 57 (39, 74)    | 1 (1, 2)   | 71 (52, 90)    | 1.0 (0.6, 1.5)                                     | 7.4 (5.1, 9.7)    | 0.4 (0.2, 0.6) | 3.4 (2.5, 4.3)  |
| Algeria             | Women | Ages 65 and older | 3.33                       | 0.2 (0.1, 0.3)           | 25 (22, 29)                   | 56 (36, 79)                                    | 240 (172, 307)  | 3 (2, 5)   | 300 (229, 374)    | 63 (40, 87)                                             | 266 (191, 340) | 4 (2, 6)   | 333 (254, 415) | 0.4 (0.3, 0.6)                                     | 3.6 (2.6, 4.6)    | 0.4 (0.2, 0.6) | 1.5 (1.1, 1.8)  |
| Algeria             | Women | Overall           | 9.31                       | 0.3 (0.1, 0.6)           | 26 (24, 28)                   | 99 (63, 137)                                   | 472 (390, 561)  | 9 (6, 13)  | 580 (479, 685)    | 11 (7, 15)                                              | 51 (42, 60)    | 1 (1, 1)   | 62 (51, 74)    | 0.6 (0.3, 0.8)                                     | 5.1 (4.2, 6.0)    | 0.4 (0.2, 0.6) | 2.1 (1.7, 2.5)  |
| Algeria             | Men   | Ages 20 to 44     | 3.42                       | 0.5 (0.2, 0.9)           | 24 (23, 25)                   | 14 (9, 19)                                     | 116 (84, 144)   | 1 (1, 1)   | 130 (98, 161)     | 2 (2, 3)                                                | 20 (14, 25)    | 0 (0, 0)   | 22 (17, 27)    | 1.4 (0.9, 1.9)                                     | 13.5 (9.7, 16.8)  | 0.2 (0.1, 0.3) | 7.3 (5.5, 9.1)  |
| Algeria             | Men   | Ages 45 to 64     | 2.65                       | 0.3 (0.1, 0.5)           | 26 (24, 27)                   | 40 (24, 57)                                    | 171 (117, 227)  | 2 (1, 2)   | 213 (154, 273)    | 15 (9, 22)                                              | 65 (44, 86)    | 1 (0, 1)   | 80 (58, 103)   | 1.0 (0.6, 1.4)                                     | 7.5 (5.1, 9.9)    | 0.2 (0.1, 0.3) | 3.5 (2.5, 4.5)  |
| Algeria             | Men   | Ages 65 and older | 3.2                        | 0.2 (0.1, 0.3)           | 25 (23, 27)                   | 40 (27, 55)                                    | 197 (140, 257)  | 1 (1, 2)   | 239 (180, 301)    | 56 (37, 75)                                             | 271 (192, 353) | 2 (1, 3)   | 329 (248, 414) | 0.4 (0.3, 0.5)                                     | 3.9 (2.8, 5.1)    | 0.1 (0.1, 0.2) | 1.6 (1.2, 2.0)  |
| Algeria             | Men   | Overall           | 9.27                       | 0.3 (0.1, 0.6)           | 25 (23, 26)                   | 94 (60, 128)                                   | 485 (394, 568)  | 4 (2, 5)   | 582 (478, 679)    | 10 (6, 14)                                              | 52 (42, 61)    | 6 (3, 7)   | 63 (52, 73)    | 0.6 (0.4, 0.8)                                     | 5.9 (4.8, 6.9)    | 0.2 (0.1, 0.2) | 2.5 (2.1, 3.0)  |
| Algeria             | Both  | Overall           | 18.6                       | 0.3 (0.1, 0.6)           | 25 (23, 27)                   | 193 (124, 265)                                 | 957 (838, 1080) | 13 (8, 19) | 1163 (1007, 1321) | 10 (7, 14)                                              | 51 (45, 58)    | 1 (0, 1)   | 63 (54, 71)    | 0.6 (0.4, 0.8)                                     | 5.5 (4.8, 6.2)    | 0.3 (0.2, 0.5) | 2.3 (2.0, 2.6)  |
| Andorra             | Women | Ages 20 to 44     | 0.00534                    | 0.7 (0.2, 1.3)           | 25 (22, 29)                   | 0 (0, 0)                                       | 0 (0, 0)        | 0 (0, 0)   | 0 (0, 0)          | 0 (0, 0)                                                | 1 (1, 1)       | 0 (0, 0)   | 1 (1, 2)       | 1.9 (1.1, 2.8)                                     | 15.2 (10.5, 19.7) | 0.4 (0.2, 0.6) | 1.6 (1.2, 2.0)  |
| Andorra             | Women | Ages 45 to 64     | 0.0112                     | 0.3 (0.1, 0.5)           | 28 (24, 32)                   | 0 (0, 0)                                       | 0 (0, 0)        | 0 (0, 0)   | 0 (0, 0)          | 2 (1, 3)                                                | 6 (4, 8)       | 2 (1, 3)   | 10 (7, 13)     | 1.0 (0.6, 1.5)                                     | 7.8 (5.1, 10.6)   | 0.3 (0.2, 0.4) | 1.1 (0.8, 1.4)  |
| Andorra             | Women | Ages 65 and older | 0.0148                     | 0.2 (0.1, 0.4)           | 26 (21, 32)                   | 0 (0, 1)                                       | 1 (0, 1)        | 0 (0, 0)   | 1 (1, 2)          | 50 (24, 81)                                             | 71 (51, 91)    | 11 (6, 16) | 131 (94, 174)  | 0.3 (0.2, 0.5)                                     | 3.0 (2.1, 3.8)    | 0.3 (0.1, 0.4) | 0.6 (0.4, 0.8)  |
| Andorra             | Women | Overall           | 0.0314                     | 0.5 (0.1, 0.8)           | 26 (22, 31)                   | 0 (0, 1)                                       | 1 (1, 1)        | 0 (0, 0)   | 1 (1, 2)          | 15 (7, 24)                                              | 22 (16, 28)    | 4 (2, 5)   | 40 (29, 52)    | 0.3 (0.2, 0.5)                                     | 3.2 (2.4, 4.0)    | 0.3 (0.2, 0.4) | 0.6 (0.4, 0.8)  |
| Andorra             | Men   | Ages 20 to 44     | 0.0055                     | 0.9 (0.3, 1.5)           | 27 (24, 29)                   | 0 (0, 0)                                       | 0 (0, 0)        | 0 (0, 0)   | 0 (0, 0)          | 2 (1, 2)                                                | 3 (2, 4)       | 0 (0, 0)   | 5 (4, 6)       | 2.1 (1.3, 3.0)                                     | 16.7 (11.3, 22.0) | 0.4 (0.2, 0.6) | 3.7 (2.8, 4.7)  |
| Andorra             | Men   | Ages 45 to 64     | 0.011                      | 0.3 (0.1, 0.6)           | 29 (26, 31)                   | 0 (0, 0)                                       | 0 (0, 0)        | 0 (0, 0)   | 0 (0, 0)          | 11 (7, 15)                                              | 15 (10, 20)    | 2 (1, 4)   | 28 (21, 35)    | 1.0 (0.6, 1.4)                                     | 8.2 (5.6, 10.8)   | 0.3 (0.2, 0.4) | 1.5 (1.1, 1.9)  |
| Andorra             | Men   | Ages 65 and older | 0.0127                     | 0.3 (0.1, 0.4)           | 28 (24, 31)                   | 0 (0, 1)                                       | 1 (0, 1)        | 0 (0, 0)   | 1 (1, 1)          | 63 (37, 96)                                             | 82 (63, 102)   | 15 (9, 21) | 160 (117, 206) | 0.4 (0.2, 0.6)                                     | 3.6 (2.7, 4.4)    | 0.2 (0.1, 0.3) | 0.7 (0.5, 0.9)  |
| Andorra             | Men   | Overall           | 0.0292                     | 0.5 (0.2, 0.9)           | 28 (25, 30)                   | 1 (0, 1)                                       | 1 (1, 1)        | 0 (0, 0)   | 1 (1, 2)          | 19 (11, 28)                                             | 25 (20, 30)    | 4 (3, 6)   | 48 (36, 60)    | 0.5 (0.3, 0.7)                                     | 4.3 (3.4, 5.1)    | 0.2 (0.1, 0.3) | 0.9 (0.6, 1.1)  |
| Andorra             | Both  | Overall           | 0.0606                     | 0.5 (0.1, 0.8)           | 27 (23, 31)                   | 1 (1, 1)                                       | 1 (1, 2)        | 0 (0, 0)   | 3 (2, 3)          | 16 (9, 24)                                              | 23 (20, 27)    | 4 (2, 6)   | 44 (33, 55)    | 0.4 (0.2, 0.6)                                     | 3.7 (3.1, 4.2)    | 0.2 (0.1, 0.3) | 0.7 (0.5, 0.9)  |
| Angola              | Women | Ages 20 to 44     | 1.29                       | 0.8 (0.2, 1.4)           | 23 (19, 27)                   | 3 (1, 4)                                       | 30 (21, 38)     | 0 (0, 0)   | 33 (24, 41)       | 1 (1, 2)                                                | 14 (10, 18)    | 0 (0, 0)   | 15 (11, 19)    | 1.1 (0.6, 1.8)                                     | 16.4 (11.7, 20.6) | 0.3 (0.1, 0.4) | 6.8 (4.9, 8.5)  |
| Angola              | Women | Ages 45 to 64     | 0.92                       | 0.4 (0.1, 0.7)           | 25 (21, 29)                   | 6 (3, 9)                                       | 60 (40, 80)     | 1 (0, 1)   | 67 (46, 88)       | 7 (3, 10)                                               | 65 (44, 87)    | 1 (0, 1)   | 73 (50, 95)    | 0.6 (0.3, 0.8)                                     | 8.2 (5.5, 10.9)   | 0.2 (0.1, 0.3) | 3.2 (2.2, 4.2)  |
| Angola              | Women | Ages 65 and older | 1.1                        | 0.3 (0.1, 0.5)           | 23 (18, 29)                   | 9 (5, 14)                                      | 52 (34, 70)     | 1 (0, 1)   | 62 (42, 81)       | 34 (17, 52)                                             | 197 (129, 269) | 3 (1, 4)   | 235 (161, 308) | 0.3 (0.1, 0.4)                                     | 4.8 (3.1, 6.5)    | 0.2 (0.1, 0.3) | 1.3 (0.9, 1.8)  |
| Angola              | Women | Overall           | 3.3                        | 0.5 (0.1, 0.9)           | 24 (19, 28)                   | 18 (9, 27)                                     | 142 (114, 171)  | 2 (1, 3)   | 161 (130, 192)    | 5 (3, 8)                                                | 43 (34, 52)    | 1 (0, 1)   | 49 (39, 58)    | 0.4 (0.2, 0.6)                                     | 7.1 (5.7, 8.6)    | 0.2 (0.1, 0.3) | 2.3 (1.8, 2.7)  |
| Angola              | Men   | Ages 20 to 44     | 1.26                       | 0.9 (0.2, 1.5)           | 22 (19, 25)                   | 4 (2, 7)                                       | 42 (29, 53)     | 0 (0, 0)   | 46 (34, 58)       | 2 (1, 3)                                                | 20 (14, 26)    | 0 (0, 0)   | 22 (17, 28)    | 1.1 (0.5, 1.7)                                     | 17.0 (12.0, 21.6) | 0.3 (0.2, 0.5) | 7.1 (5.3, 8.9)  |
| Angola              | Men   | Ages 45 to 64     | 0.838                      | 0.4 (0.1, 0.7)           | 23 (20, 26)                   | 10 (5, 16)                                     | 73 (49, 98)     | 1 (1, 2)   | 85 (60, 110)      | 12 (6, 19)                                              | 87 (58, 117)   | 1 (1, 2)   | 101 (71, 131)  | 0.5 (0.3, 0.8)                                     | 8.7 (5.8, 11.6)   | 0.3 (0.2, 0.5) | 2.9 (2.1, 3.8)  |
| Angola              | Men   | Ages 65 and older | 1.02                       | 0.3 (0.1, 0.5)           | 22 (19, 26)                   | 8 (4, 12)                                      | 44 (28, 60)     | 1 (0, 1)   | 53 (36, 70)       | 38 (19, 57)                                             | 210 (133, 286) | 4 (2, 6)   | 251 (173, 332) | 0.3 (0.1, 0.4)                                     | 5.2 (3.3, 7.1)    | 0.3 (0.1, 0.4) | 1.4 (1.0, 1.8)  |
| Angola              | Men   | Overall           | 3.12                       | 0.6 (0.2, 0.9)           | 22 (19, 25)                   | 23 (12, 35)                                    | 159 (130, 191)  | 2 (1, 3)   | 184 (152, 219)    | 7 (4, 11)                                               | 51 (42, 61)    | 1 (0, 1)   | 59 (49, 70)    | 0.4 (0.2, 0.7)                                     | 8.2 (6.7, 9.8)    | 0.3 (0.2, 0.5) | 2.5 (2.1, 3.0)  |
| Angola              | Both  | Overall           | 6.42                       | 0.5 (0.1, 0.9)           | 23 (19, 27)                   | 41 (21, 62)                                    | 301 (259, 343)  | 4 (2, 6)   | 345 (295, 397)    | 6 (3, 10)                                               | 47 (40, 53)    | 1 (0, 1)   | 54 (46, 62)    | 0.4 (0.2, 0.6)                                     | 7.6 (6.6, 8.7)    | 0.3 (0.1, 0.4) | 2.4 (2.0, 2.7)  |
| Antigua and Barbuda | Women | Ages 20 to 44     | 0.00628                    | 0.7 (0.2, 1.3)           | 26 (22, 30)                   | 0 (0, 0)                                       | 0 (0, 0)        | 0 (0, 0)   | 0 (0, 0)          | 1 (0, 1)                                                | 14 (9, 19)     | 0 (0, 1)   | 15 (11, 20)    | 2.2 (1.3, 3.4)                                     | 15.4 (10.3, 20.4) | 0.5 (0.3, 0.7) | 8.5 (5.9, 11.2) |
| Antigua and Barbuda | Women | Ages 45 to 64     | 0.00823                    |                          |                               |                                                |                 |            |                   |                                                         |                |            |                |                                                    |                   |                |                 |

|            |       |                   |        |               |             |               |                |             |                |               |                |            |                |               |                  |               |                |
|------------|-------|-------------------|--------|---------------|-------------|---------------|----------------|-------------|----------------|---------------|----------------|------------|----------------|---------------|------------------|---------------|----------------|
| Armenia    | Women | Ages 20 to 44     | 0.254  | 0.3(0.1, 0.4) | 25 (24, 26) | 0 (0, 1)      | 3 (3, 4)       | 0 (0, 0)    | 4 (3, 5)       | 1 (1, 1)      | 8 (6, 10)      | 0 (0, 1)   | 9 (7, 11)      | 1.2(0.7, 1.7) | 9.7(7.1, 12.3)   | 0.3(0.2, 0.4) | 2.9(2.2, 3.7)  |
| Armenia    | Women | Ages 45 to 64     | 0.424  | 0.1(0.0, 0.2) | 30 (28, 31) | 3 (2, 4)      | 19 (13, 25)    | 1 (1, 1)    | 23 (17, 29)    | 7 (4, 10)     | 44 (31, 58)    | 2 (1, 3)   | 54 (39, 69)    | 0.7(0.5, 1.1) | 5.7(4.0, 7.4)    | 0.2(0.1, 0.3) | 2.1(1.5, 2.7)  |
| Armenia    | Women | Ages 65 and older | 0.401  | 0.1(0.0, 0.2) | 29 (25, 33) | 17 (9, 26)    | 34 (24, 44)    | 1 (1, 1)    | 52 (38, 67)    | 80 (43, 124)  | 160 (113, 208) | 5 (3, 7)   | 245 (179, 315) | 0.3(0.2, 0.5) | 3.2(2.3, 4.2)    | 0.2(0.1, 0.3) | 0.7(0.5, 0.9)  |
| Armenia    | Women | Overall           | 1.08   | 0.2(0.0, 0.3) | 28 (26, 30) | 21 (12, 31)   | 56 (45, 68)    | 2 (1, 3)    | 79 (62, 96)    | 19 (11, 29)   | 52 (41, 63)    | 2 (1, 3)   | 73 (58, 89)    | 0.3(0.2, 0.5) | 4.0(3.1, 4.8)    | 0.2(0.1, 0.3) | 0.9(0.7, 1.1)  |
| Armenia    | Men   | Ages 20 to 44     | 0.218  | 0.3(0.1, 0.5) | 25 (24, 26) | 2 (1, 3)      | 6 (4, 7)       | 0 (0, 0)    | 8 (6, 9)       | 5 (3, 7)      | 15 (11, 20)    | 0 (0, 0)   | 21 (16, 26)    | 1.0(0.6, 1.3) | 9.7(7.0, 12.3)   | 0.1(0.1, 0.2) | 2.7(2.1, 3.3)  |
| Armenia    | Men   | Ages 45 to 64     | 0.323  | 0.1(0.0, 0.2) | 27 (25, 28) | 11 (6, 15)    | 18 (12, 24)    | 0 (0, 1)    | 29 (22, 37)    | 33 (20, 46)   | 56 (39, 75)    | 1 (1, 2)   | 90 (67, 113)   | 0.8(0.5, 1.1) | 5.9(4.1, 8.0)    | 0.2(0.1, 0.3) | 1.6(1.2, 2.0)  |
| Armenia    | Men   | Ages 65 and older | 0.276  | 0.1(0.0, 0.2) | 26 (23, 28) | 18 (10, 26)   | 22 (16, 29)    | 1 (0, 1)    | 40 (29, 52)    | 134 (78, 197) | 169 (119, 218) | 6 (3, 8)   | 308 (221, 396) | 0.4(0.2, 0.5) | 3.4(2.4, 4.4)    | 0.1(0.1, 0.2) | 0.7(0.5, 0.9)  |
| Armenia    | Men   | Overall           | 0.817  | 0.2(0.1, 0.3) | 25 (24, 27) | 30 (18, 43)   | 46 (37, 55)    | 1 (1, 2)    | 77 (60, 94)    | 37 (22, 52)   | 56 (45, 67)    | 2 (1, 2)   | 94 (73, 116)   | 0.5(0.3, 0.7) | 4.5(3.7, 5.4)    | 0.2(0.1, 0.2) | 0.9(0.7, 1.2)  |
| Armenia    | Both  | Overall           | 1.9    | 0.2(0.1, 0.3) | 27 (25, 28) | 51 (30, 72)   | 102 (86, 117)  | 3 (2, 5)    | 156 (126, 187) | 27 (16, 38)   | 54 (46, 62)    | 2 (1, 2)   | 82 (66, 99)    | 0.4(0.2, 0.6) | 4.2(3.6, 4.8)    | 0.2(0.1, 0.3) | 0.9(0.8, 1.1)  |
| Australia  | Women | Ages 20 to 44     | 1.45   | 0.5(0.1, 0.9) | 26 (25, 26) | 1 (1, 2)      | 6 (4, 7)       | 1 (1, 1)    | 8 (6, 10)      | 0 (0, 1)      | 2 (1, 2)       | 0 (0, 0)   | 3 (2, 3)       | 1.6(1.0, 2.3) | 12.8(9.2, 16.4)  | 0.3(0.2, 0.5) | 1.8(1.3, 2.2)  |
| Australia  | Women | Ages 45 to 64     | 2.79   | 0.2(0.1, 0.4) | 29 (28, 30) | 6 (4, 9)      | 22 (15, 30)    | 6 (3, 8)    | 34 (24, 43)    | 2 (1, 3)      | 8 (5, 11)      | 2 (1, 3)   | 12 (9, 15)     | 0.9(0.5, 1.2) | 7.0(4.7, 9.5)    | 0.3(0.2, 0.4) | 1.0(0.7, 1.3)  |
| Australia  | Women | Ages 65 and older | 3.17   | 0.2(0.1, 0.3) | 28 (27, 29) | 60 (31, 98)   | 94 (69, 119)   | 15 (9, 22)  | 170 (125, 222) | 37 (19, 60)   | 57 (42, 73)    | 9 (6, 13)  | 104 (77, 136)  | 0.3(0.1, 0.4) | 2.7(2.0, 3.4)    | 0.2(0.1, 0.3) | 0.5(0.4, 0.7)  |
| Australia  | Women | Overall           | 7.42   | 0.3(0.1, 0.5) | 27 (26, 28) | 68 (36, 108)  | 121 (94, 150)  | 22 (13, 31) | 211 (161, 273) | 9 (5, 15)     | 16 (13, 20)    | 3 (2, 4)   | 28 (22, 37)    | 0.3(0.2, 0.5) | 3.2(2.5, 3.9)    | 0.2(0.1, 0.3) | 0.6(0.4, 0.8)  |
| Australia  | Men   | Ages 20 to 44     | 1.48   | 0.5(0.2, 0.9) | 27 (26, 27) | 5 (3, 7)      | 9 (6, 12)      | 1 (0, 1)    | 14 (10, 18)    | 2 (1, 2)      | 3 (2, 4)       | 0 (0, 0)   | 5 (3, 6)       | 1.6(1.0, 2.3) | 12.6(8.6, 16.7)  | 0.3(0.2, 0.4) | 2.9(2.1, 3.7)  |
| Australia  | Men   | Ages 45 to 64     | 2.74   | 0.3(0.1, 0.4) | 29 (28, 30) | 22 (13, 31)   | 43 (29, 58)    | 7 (4, 10)   | 72 (53, 92)    | 8 (5, 11)     | 16 (11, 21)    | 3 (1, 4)   | 26 (19, 33)    | 0.9(0.5, 1.3) | 7.2(4.9, 9.5)    | 0.3(0.1, 0.4) | 1.5(1.1, 1.9)  |
| Australia  | Men   | Ages 65 and older | 2.9    | 0.2(0.1, 0.3) | 28 (27, 28) | 60 (32, 90)   | 110 (82, 139)  | 17 (10, 24) | 187 (139, 239) | 43 (23, 65)   | 80 (60, 101)   | 12 (7, 18) | 136 (101, 174) | 0.3(0.2, 0.5) | 3.2(2.4, 4.0)    | 0.2(0.1, 0.3) | 0.7(0.5, 0.9)  |
| Australia  | Men   | Overall           | 7.12   | 0.3(0.1, 0.5) | 28 (27, 28) | 86 (50, 126)  | 163 (131, 196) | 25 (15, 35) | 273 (214, 341) | 12 (7, 18)    | 23 (18, 28)    | 3 (2, 5)   | 38 (30, 48)    | 0.4(0.2, 0.6) | 3.9(3.2, 4.7)    | 0.2(0.1, 0.3) | 0.9(0.7, 1.1)  |
| Australia  | Both  | Overall           | 14.5   | 0.3(0.1, 0.5) | 27 (27, 28) | 154 (91, 228) | 284 (240, 327) | 47 (28, 65) | 485 (382, 602) | 11 (6, 16)    | 20 (17, 23)    | 3 (2, 4)   | 33 (26, 41)    | 0.4(0.2, 0.5) | 3.6(3.0, 4.1)    | 0.2(0.1, 0.3) | 0.7(0.6, 0.9)  |
| Austria    | Women | Ages 20 to 44     | 0.535  | 0.6(0.5, 0.8) | 23 (21, 26) | 0 (0, 1)      | 1 (1, 1)       | 0 (0, 0)    | 2 (1, 2)       | 0 (0, 0)      | 1 (1, 1)       | 0 (0, 0)   | 1 (1, 2)       | 1.4(0.9, 2.0) | 12.4(8.3, 16.7)  | 0.3(0.2, 0.5) | 1.2(0.9, 1.6)  |
| Austria    | Women | Ages 45 to 64     | 1.14   | 0.3(0.2, 0.3) | 27 (24, 30) | 3 (2, 5)      | 9 (6, 12)      | 2 (1, 3)    | 14 (10, 18)    | 3 (2, 4)      | 8 (5, 10)      | 2 (1, 3)   | 12 (9, 16)     | 1.0(0.6, 1.4) | 7.2(4.7, 9.7)    | 0.3(0.2, 0.4) | 1.1(0.8, 1.4)  |
| Austria    | Women | Ages 65 and older | 1.51   | 0.2(0.2, 0.3) | 28 (24, 32) | 49 (25, 78)   | 72 (51, 90)    | 9 (5, 13)   | 130 (95, 171)  | 57 (29, 89)   | 83 (59, 104)   | 10 (6, 15) | 150 (109, 197) | 0.3(0.2, 0.5) | 2.7(1.9, 3.4)    | 0.3(0.2, 0.4) | 0.6(0.5, 0.8)  |
| Austria    | Women | Overall           | 3.19   | 0.4(0.3, 0.5) | 26 (23, 29) | 53 (28, 82)   | 82 (60, 100)   | 12 (7, 17)  | 146 (108, 190) | 17 (9, 26)    | 26 (19, 31)    | 4 (2, 5)   | 46 (34, 60)    | 0.4(0.2, 0.6) | 2.9(2.2, 3.6)    | 0.3(0.2, 0.4) | 0.7(0.5, 0.9)  |
| Austria    | Men   | Ages 20 to 44     | 0.541  | 0.7(0.6, 0.9) | 25 (24, 27) | 2 (1, 3)      | 4 (3, 5)       | 0 (0, 0)    | 6 (4, 8)       | 2 (1, 2)      | 3 (2, 4)       | 0 (0, 0)   | 5 (4, 6)       | 1.8(1.1, 2.6) | 14.7(9.9, 19.6)  | 0.3(0.2, 0.6) | 3.4(2.5, 4.3)  |
| Austria    | Men   | Ages 45 to 64     | 1.13   | 0.2(0.2, 0.3) | 28 (26, 30) | 12 (7, 17)    | 27 (18, 35)    | 3 (2, 4)    | 42 (31, 53)    | 11 (7, 15)    | 24 (16, 31)    | 3 (2, 4)   | 37 (28, 47)    | 1.0(0.6, 1.4) | 7.6(5.1, 10.0)   | 0.3(0.2, 0.5) | 1.8(1.3, 2.3)  |
| Austria    | Men   | Ages 65 and older | 1.27   | 0.3(0.2, 0.3) | 27 (24, 30) | 38 (22, 57)   | 66 (48, 83)    | 7 (4, 11)   | 111 (82, 142)  | 62 (35, 92)   | 106 (78, 134)  | 12 (7, 17) | 180 (133, 230) | 0.4(0.2, 0.6) | 3.5(2.6, 4.4)    | 0.2(0.1, 0.3) | 0.8(0.6, 1.1)  |
| Austria    | Men   | Overall           | 2.93   | 0.4(0.3, 0.5) | 27 (24, 29) | 52 (30, 75)   | 96 (77, 117)   | 10 (6, 15)  | 159 (121, 197) | 18 (10, 26)   | 33 (26, 40)    | 4 (2, 5)   | 54 (41, 67)    | 0.5(0.3, 0.7) | 4.2(3.4, 5.1)    | 0.2(0.1, 0.3) | 1.0(0.8, 1.2)  |
| Austria    | Both  | Overall           | 6.12   | 0.4(0.3, 0.5) | 26 (24, 29) | 105 (63, 153) | 178 (149, 208) | 22 (13, 31) | 305 (238, 375) | 17 (10, 25)   | 29 (24, 34)    | 4 (2, 5)   | 50 (39, 61)    | 0.4(0.2, 0.6) | 3.5(2.9, 4.1)    | 0.2(0.1, 0.3) | 0.8(0.6, 1.0)  |
| Azerbaijan | Women | Ages 20 to 44     | 0.745  | 0.1(0.0, 0.2) | 26 (25, 27) | 2 (1, 3)      | 6 (5, 8)       | 0 (0, 1)    | 9 (7, 11)      | 2 (1, 2)      | 4 (3, 6)       | 0 (0, 0)   | 6 (5, 8)       | 0.9(0.5, 1.2) | 7.1(5.1, 9.2)    | 0.2(0.1, 0.3) | 1.6(1.2, 2.1)  |
| Azerbaijan | Women | Ages 45 to 64     | 1.05   | 0.0(0.0, 0.1) | 30 (28, 31) | 9 (5, 13)     | 23 (16, 31)    | 1 (1, 2)    | 33 (25, 42)    | 8 (5, 12)     | 22 (15, 30)    | 1 (1, 2)   | 32 (24, 40)    | 0.6(0.4, 0.9) | 4.9(3.3, 6.5)    | 0.2(0.1, 0.3) | 1.4(1.0, 1.8)  |
| Azerbaijan | Women | Ages 65 and older | 1.02   | 0.0(0.0, 0.1) | 29 (25, 32) | 26 (15, 37)   | 21 (14, 28)    | 1 (1, 2)    | 48 (35, 63)    | 73 (43, 105)  | 60 (41, 78)    | 3 (2, 4)   | 137 (99, 179)  | 0.3(0.2, 0.4) | 3.0(2.0, 3.9)    | 0.3(0.2, 0.4) | 0.5(0.3, 0.6)  |
| Azerbaijan | Women | Overall           | 2.81   | 0.1(0.0, 0.1) | 28 (26, 30) | 37 (22, 53)   | 51 (41, 61)    | 3 (2, 4)    | 91 (71, 113)   | 13 (8, 19)    | 18 (15, 22)    | 1 (1, 1)   | 32 (25, 40)    | 0.4(0.2, 0.5) | 4.0(3.2, 4.8)    | 0.2(0.1, 0.3) | 0.7(0.5, 0.9)  |
| Azerbaijan | Men   | Ages 20 to 44     | 0.736  | 0.1(0.0, 0.2) | 25 (24, 26) | 6 (4, 9)      | 8 (6, 11)      | 0 (0, 0)    | 15 (11, 19)    | 5 (3, 7)      | 6 (4, 8)       | 0 (0, 0)   | 11 (8, 14)     | 0.9(0.5, 1.2) | 7.4(5.3, 9.6)    | 0.2(0.1, 0.3) | 1.6(1.2, 2.0)  |
| Azerbaijan | Men   | Ages 45 to 64     | 0.95   | 0.1(0.0, 0.1) | 27 (26, 28) | 23 (14, 32)   | 22 (15, 29)    | 1 (1, 2)    | 46 (33, 59)    | 24 (15, 34)   | 23 (16, 31)    | 1 (1, 2)   | 48 (34, 62)    | 0.6(0.4, 0.9) | 5.0(3.4, 6.6)    | 0.3(0.2, 0.4) | 1.0(0.7, 1.3)  |
| Azerbaijan | Men   | Ages 65 and older | 0.84   | 0.0(0.0, 0.1) | 26 (24, 28) | 28 (17, 41)   | 16 (11, 21)    | 1 (1, 2)    | 46 (32, 60)    | 114 (68, 163) | 64 (43, 85)    | 5 (3, 7)   | 183 (128, 241) | 0.3(0.2, 0.5) | 3.0(2.1, 4.0)    | 0.3(0.2, 0.5) | 0.5(0.3, 0.6)  |
| Azerbaijan | Men   | Overall           | 2.53   | 0.1(0.0, 0.1) | 26 (25, 27) | 58 (35, 80)   | 46 (37, 55)    | 3 (2, 4)    | 106 (78, 134)  | 23 (14, 32)   | 18 (15, 22)    | 1 (1, 2)   | 42 (31, 53)    | 0.4(0.3, 0.6) | 4.3(3.5, 5.1)    | 0.3(0.2, 0.4) | 0.7(0.5, 0.9)  |
| Azerbaijan | Both  | Overall           | 5.34   | 0.1(0.0, 0.1) | 27 (25, 29) | 94 (57, 132)  | 97 (83, 111)   | 5 (3, 8)    | 197 (149, 245) | 18 (11, 25)   | 18 (16, 21)    | 1 (1, 1)   | 37 (28, 46)    | 0.4(0.2, 0.6) | 4.1(3.5, 4.7)    | 0.3(0.2, 0.4) | 0.7(0.5, 0.9)  |
| Bahamas    | Women | Ages 20 to 44     | 0.0272 | 0.9(0.3, 1.6) | 28 (24, 32) | 0 (0, 0)      | 1 (1, 1)       | 0 (0, 0)    | 1 (1, 2)       | 2 (1, 4)      | 21 (16, 25)    | 1 (0, 1)   | 24 (19, 29)    | 3.0(1.6, 4.8) | 20.0(15.2, 24.7) | 0.6(0.3, 0.9) | 7.8(6.0, 9.6)  |
| Bahamas    | Women | Ages 45 to 64     | 0.0396 | 0.4(0.1, 0.8) | 31 (28, 35) | 0 (0, 0)      | 1 (1, 2)       | 0 (0, 0)    | 2 (1, 2)       | 5 (3, 7)      | 35 (24, 47)    | 1 (1, 2)   | 41 (29, 54)    | 1.5(0.9, 2.3) | 9.6(6.7, 12.7)   | 0.4(0.3, 0.7) | 4.5(3.2, 5.8)  |
| Bahamas    | Women | Ages 65 and older | 0.0403 | 0.3(0.1, 0.6) | 29 (24, 35) | 1 (0, 1)      | 3 (2, 4)       | 0 (0, 0)    | 4 (3, 5)       | 43 (24, 67)   | 222 (162, 284) | 8 (4, 12)  | 273 (207, 344) | 0.6(0.3, 0.9) | 4.3(3.2, 5.5)    | 0.4(0.2, 0.6) | 2.1(1.6, 2.7)  |
| Bahamas    | Women | Overall           | 0.107  | 0.6(0.2, 1.0) | 29 (25, 34) | 1 (1, 1)      | 6 (5, 7)       | 0 (0, 0)    | 7 (5, 8)       | 8 (5, 13)     | 52 (43, 62)    | 2 (1, 3)   | 62 (51, 74)    | 0.8(0.5, 1.2) | 6.1(5.0, 7.2)    | 0.4(0.3, 0.6) | 2.9(2.4, 3.5)  |
| Bahamas    | Men   | Ages 20 to 44     | 0.027  | 1.0(0.3, 1.7) | 26 (24, 29) | 0 (0, 0)      | 1 (1, 2)       | 0 (0, 0)    | 2 (1, 2)       | 5 (2, 8)      | 24 (17, 30)    | 1 (0, 1)   | 29 (22, 36)    | 2.9(1.5, 4.8) | 20.2(14.7, 25.2) | 0.4(0.2, 0.7) | 8.8(6.6, 10.9) |
| Bahamas    | Men   | Ages 45 to 64     | 0.0355 | 0.5(0.1, 0.8) | 28 (26, 31) | 1 (0, 1)      | 3 (2, 4)       | 0 (0, 0)    | 4 (3, 5)       | 22 (13, 32)   | 81 (55, 105)   | 3 (2, 4)   | 105 (77, 134)  | 1.5(0.9, 2.2) | 10.3(7.0, 13.3)  | 0.5(0.3, 0.8) | 4.1(3.0, 5.2)  |
| Bahamas    | Men   | Ages 65 and older | 0.0354 | 0.4(0.1, 0.6) | 27 (24, 31) | 1 (1, 1)      | 3 (2, 4)       | 0 (0, 0)    | 4 (3, 5)       | 89 (53, 130)  | 290 (205, 378) | 11 (7, 16) | 390 (283, 495) | 0.8(0.5, 1.1) | 5.3(3.8, 7.0)    | 0.4(0.2, 0.6) | 2.2(1.6, 2.8)  |
| Bahamas    | Men   | Overall           | 0.0979 | 0.6(0.2, 1.1) | 27 (24, 30) | 2 (1, 3)      | 7 (6, 8)       | 0 (0, 0)    | 9 (7, 11)      | 19 (12, 27)   | 71 (58, 84)    | 2 (1, 4)   | 92 (74, 111)   | 1.1(0.7, 1.6) | 8.0(6.6, 9.6)    | 0.4(0.3, 0.6) | 3.2(2.6, 3.9)  |
| Bahamas    | Both  | Overall           | 0.205  | 0.6(0.2, 1.0) | 28 (25, 32) | 3 (2, 4)      | 12 (11, 14)    | 0 (0, 1)    | 16 (13, 18)    | 14 (8, 19)    | 61 (53, 69)    | 2 (1, 3)   | 77 (64, 89)    | 1.0(0.6, 1.4) | 7.0(6.1, 8.0)    | 0.4(0.3, 0.6) | 3.1(2.6, 3.6)  |
| Bahrain    | Women | Ages 20 to 44     | 0.106  | 0.6(0.1, 1.1) | 28 (26, 30) | 0 (0, 0)      | 1 (1, 2)       | 0 (0, 0)    | 1 (1, 2)       | 1 (0, 1)      | 6 (4, 8)       | 0 (0, 1)   | 7 (5, 10)      | 2.0(1.2, 3.1) | 14.1(9.7, 18.7)  | 0.4(0.2, 0.6) | 3.8(2.8, 5.0)  |
| Bahrain    | Women | Ages 45 to 64     | 0.0711 | 0.3(0.1, 0.6) | 30 (28, 32) | 0 (0, 1)      | 6 (4, 8)       | 0 (0, 0)    | 7 (5, 9)       | 6 (4, 9)      | 87 (60, 114)   | 2 (1, 3)   | 95 (69, 123)   | 1.1(0.7, 1.6) | 4.4(3.0, 5.1)    | 0.3(0.2, 0.5) | 5.1(3.7, 6.6)  |
| Bahrain    | Women | Ages 65 and older | 0.0903 | 0.2(0.1, 0.4) | 27 (25, 29) | 1 (0, 1)      | 6 (4, 8)       | 0 (0, 0)    | 7 (5, 8)       | 39 (23, 56)   | 456 (325, 583) | 5 (3, 8)   | 500 (363, 627) | 0.5(0.3, 0.7) | 8.2(5.0, 5.3)    | 0.3(0.2, 0.5) | 3.1(2.2, 3.8)  |
| Bahrain    | Women | Overall           | 0.268  | 0.4(0.1, 0.7) | 28 (26, 30) | 1 (1, 2)      | 13 (11, 16)    | 0 (0, 0)    | 15 (12, 18)    | 4 (2, 6)      | 50 (40, 60)    | 1 (1, 2)   | 55 (44, 66)    | 0.7(0.4, 1.0) | 5.9(4.8, 7.1)    | 0.4(0.2, 0.5) | 3.8(3.1, 4.6)  |
| Bahrain    | Men   | Ages 20 to 44     | 0.247  | 0.6(0.2, 1.1) | 28 (26, 29) | 1 (1, 1)      | 4 (3, 5)       | 0 (0, 0)    | 5 (3, 6)       | 2 (1, 3)      | 9 (6, 12)      | 0 (0, 0)   | 12 (8, 15)     | 2.0(1.2, 2.8) | 14.4(9.5, 18.9)  | 0.3(0.1, 0.5) | 6.3(4.5, 8.1)  |
| Bahrain    | Men   | Ages 45 to 64     | 0.127  | 0.3(0.1, 0.6) | 29 (27, 30) | 1 (1, 2)      | 15 (10, 19)    | 0 (0, 0)    | 16 (12, 21)    | 11 (7, 16)    | 115 (81, 151)  | 1 (1, 2)   | 128 (92, 164)  | 1.1(0.7, 1.6) | 8.4(5.9, 11.0)   | 0.3(0.1, 0.4) | 6.0(4.3, 7.7)  |
| Bahrain    | Men   | Ages 65 and older | 0.018  | 0.2(0.1, 0.4) | 27 (25, 28) | 1 (0, 1)      | 7 (5, 9)       |             |                |               |                |            |                |               |                  |               |                |

|          |       |                   |        |                |             |                |                |             |                |                |                  |             |                   |                |                   |                |                   |
|----------|-------|-------------------|--------|----------------|-------------|----------------|----------------|-------------|----------------|----------------|------------------|-------------|-------------------|----------------|-------------------|----------------|-------------------|
| Barbados | Men   | Overall           | 0.0903 | 2.3 (1.7, 2.8) | 26 (24, 28) | 4 (2, 5)       | 23 (19, 27)    | 1 (1, 1)    | 27 (22, 32)    | 39 (23, 55)    | 251 (211, 295)   | 10 (6, 13)  | 300 (248, 355)    | 2.2 (1.3, 3.1) | 15.4 (12.9, 18.1) | 0.9 (0.5, 1.3) | 8.4 (7.0, 9.9)    |
| Barbados | Both  | Overall           | 0.186  | 2.2 (1.7, 2.7) | 28 (25, 30) | 8 (5, 11)      | 62 (53, 71)    | 2 (1, 3)    | 72 (61, 83)    | 42 (25, 60)    | 333 (287, 380)   | 12 (7, 17)  | 387 (331, 447)    | 1.7 (1.0, 2.4) | 12.7 (10.9, 14.4) | 1.0 (0.6, 1.4) | 7.3 (6.2, 8.4)    |
| 5        |       |                   |        |                |             |                |                |             |                |                |                  |             |                   |                |                   |                |                   |
| Belarus  | Women | Ages 20 to 44     | 0.75   | 0.3 (0.1, 0.5) | 26 (22, 29) | 2 (1, 3)       | 4 (3, 5)       | 0 (0, 1)    | 7 (5, 8)       | 2 (1, 2)       | 3 (2, 4)         | 0 (0, 0)    | 5 (3, 6)          | 1.2 (0.7, 1.8) | 10.2 (7.0, 13.1)  | 0.3 (0.1, 0.4) | 1.7 (1.3, 2.1)    |
| Belarus  | Women | Ages 45 to 64     | 1.43   | 0.1 (0.0, 0.2) | 28 (24, 32) | 22 (14, 32)    | 10 (7, 14)     | 3 (2, 4)    | 36 (25, 47)    | 16 (10, 22)    | 7 (5, 10)        | 2 (1, 3)    | 25 (17, 33)       | 0.7 (0.4, 1.0) | 5.7 (3.8, 7.7)    | 0.2 (0.1, 0.3) | 0.7 (0.5, 1.0)    |
| Belarus  | Women | Ages 65 and older | 1.58   | 0.1 (0.0, 0.2) | 27 (21, 32) | 124 (66, 189)  | 13 (9, 16)     | 4 (3, 6)    | 141 (82, 209)  | 138 (73, 210)  | 14 (10, 18)      | 5 (3, 7)    | 157 (91, 232)     | 0.3 (0.2, 0.4) | 3.2 (2.3, 4.2)    | 0.2 (0.1, 0.3) | 0.3 (0.2, 0.4)    |
| Belarus  | Women | Overall           | 3.76   | 0.2 (0.1, 0.3) | 27 (22, 31) | 149 (82, 224)  | 27 (22, 32)    | 7 (4, 11)   | 183 (114, 261) | 40 (22, 60)    | 7 (6, 9)         | 2 (1, 3)    | 49 (30, 69)       | 0.3 (0.2, 0.5) | 4.4 (3.5, 5.3)    | 0.2 (0.1, 0.3) | 0.3 (0.2, 0.5)    |
| Belarus  | Men   | Ages 20 to 44     | 0.767  | 0.3 (0.1, 0.5) | 26 (23, 28) | 6 (5, 8)       | 6 (5, 8)       | 0 (0, 0)    | 19 (14, 25)    | 9 (5, 13)      | 4 (3, 6)         | 0 (0, 0)    | 14 (10, 18)       | 1.2 (0.7, 1.7) | 10.3 (7.5, 13.1)  | 0.2 (0.1, 0.4) | 1.5 (1.1, 2.0)    |
| Belarus  | Men   | Ages 45 to 64     | 1.2    | 0.2 (0.0, 0.3) | 27 (24, 30) | 71 (43, 100)   | 11 (7, 14)     | 4 (2, 6)    | 86 (55, 116)   | 60 (36, 84)    | 9 (6, 12)        | 3 (2, 5)    | 72 (46, 97)       | 0.8 (0.5, 1.1) | 6.2 (4.3, 8.0)    | 0.3 (0.2, 0.4) | 0.7 (0.5, 1.0)    |
| Belarus  | Men   | Ages 65 and older | 1.07   | 0.1 (0.0, 0.2) | 26 (23, 29) | 89 (53, 129)   | 6 (4, 8)       | 4 (2, 6)    | 99 (61, 140)   | 216 (128, 311) | 14 (9, 19)       | 10 (6, 15)  | 240 (147, 338)    | 0.4 (0.2, 0.5) | 3.6 (2.4, 4.7)    | 0.1 (0.1, 0.2) | 0.4 (0.2, 0.5)    |
| Belarus  | Men   | Overall           | 3.03   | 0.2 (0.1, 0.3) | 26 (23, 29) | 174 (104, 244) | 23 (19, 27)    | 8 (5, 12)   | 205 (130, 279) | 57 (34, 81)    | 8 (6, 9)         | 3 (2, 4)    | 68 (43, 92)       | 0.5 (0.3, 0.7) | 5.7 (4.7, 6.8)    | 0.2 (0.1, 0.3) | 0.5 (0.3, 0.7)    |
| Belarus  | Both  | Overall           | 6.79   | 0.2 (0.1, 0.3) | 26 (23, 30) | 322 (191, 459) | 50 (43, 57)    | 16 (10, 22) | 388 (249, 534) | 47 (28, 68)    | 7 (6, 8)         | 2 (1, 3)    | 57 (37, 79)       | 0.4 (0.2, 0.6) | 4.9 (4.3, 5.7)    | 0.2 (0.1, 0.3) | 0.4 (0.3, 0.6)    |
| Belgium  | Women | Ages 20 to 44     | 0.687  | 1.1 (0.9, 1.3) | 23 (22, 25) | 1 (1, 1)       | 3 (2, 4)       | 1 (1, 1)    | 5 (4, 6)       | 1 (0, 1)       | 2 (1, 3)         | 1 (0, 1)    | 3 (2, 4)          | 2.2 (1.4, 3.1) | 19.1 (13.5, 24.4) | 0.5 (0.3, 0.8) | 2.0 (1.5, 2.4)    |
| Belgium  | Women | Ages 45 to 64     | 1.46   | 0.5 (0.4, 0.6) | 27 (25, 29) | 7 (4, 10)      | 15 (10, 19)    | 6 (3, 8)    | 27 (20, 35)    | 5 (3, 7)       | 10 (7, 13)       | 4 (2, 6)    | 19 (14, 24)       | 1.3 (0.8, 1.8) | 9.7 (6.7, 12.8)   | 0.4 (0.2, 0.6) | 1.2 (0.9, 1.5)    |
| Belgium  | Women | Ages 65 and older | 1.83   | 0.4 (0.3, 0.4) | 28 (25, 30) | 60 (32, 92)    | 85 (62, 108)   | 15 (9, 21)  | 160 (114, 207) | 55 (30, 85)    | 78 (57, 100)     | 14 (8, 20)  | 147 (106, 191)    | 0.4 (0.2, 0.6) | 3.6 (2.7, 4.6)    | 0.3 (0.2, 0.4) | 0.7 (0.5, 0.9)    |
| Belgium  | Women | Overall           | 3.98   | 0.7 (0.5, 0.8) | 26 (24, 28) | 68 (39, 102)   | 103 (79, 127)  | 21 (13, 30) | 192 (142, 245) | 17 (10, 26)    | 26 (20, 32)      | 5 (3, 8)    | 48 (36, 62)       | 0.4 (0.3, 0.7) | 4.1 (3.2, 5.1)    | 0.3 (0.2, 0.5) | 0.8 (0.6, 1.0)    |
| Belgium  | Men   | Ages 20 to 44     | 0.689  | 1.3 (1.0, 1.5) | 26 (24, 27) | 3 (2, 5)       | 8 (5, 10)      | 1 (0, 1)    | 12 (9, 15)     | 2 (1, 3)       | 5 (3, 7)         | 0 (0, 1)    | 8 (6, 10)         | 2.7 (1.6, 3.9) | 20.8 (14.0, 27.2) | 0.6 (0.4, 1.0) | 5.0 (3.7, 6.3)    |
| Belgium  | Men   | Ages 45 to 64     | 1.46   | 0.5 (0.4, 0.6) | 28 (27, 30) | 23 (14, 33)    | 32 (22, 42)    | 7 (4, 10)   | 62 (45, 79)    | 16 (10, 22)    | 22 (15, 29)      | 5 (3, 7)    | 43 (31, 54)       | 1.3 (0.8, 1.8) | 10.3 (7.2, 13.5)  | 0.5 (0.3, 0.7) | 1.9 (1.4, 2.4)    |
| Belgium  | Men   | Ages 65 and older | 1.56   | 0.4 (0.3, 0.5) | 27 (26, 29) | 55 (31, 81)    | 60 (45, 74)    | 15 (9, 21)  | 130 (94, 167)  | 70 (39, 103)   | 76 (57, 94)      | 19 (11, 27) | 164 (119, 212)    | 0.5 (0.3, 0.7) | 4.4 (3.3, 5.5)    | 0.3 (0.1, 0.4) | 0.8 (0.6, 1.0)    |
| Belgium  | Men   | Overall           | 3.71   | 0.7 (0.6, 0.9) | 27 (25, 28) | 82 (48, 118)   | 99 (81, 117)   | 22 (13, 31) | 204 (152, 255) | 22 (13, 32)    | 27 (22, 32)      | 6 (4, 8)    | 55 (41, 69)       | 0.6 (0.4, 0.9) | 5.8 (4.7, 6.9)    | 0.3 (0.2, 0.5) | 1.0 (0.8, 1.3)    |
| Belgium  | Both  | Overall           | 7.7    | 0.7 (0.6, 0.9) | 26 (25, 28) | 150 (91, 214)  | 202 (171, 235) | 44 (26, 61) | 396 (299, 493) | 19 (12, 28)    | 26 (22, 31)      | 6 (3, 8)    | 51 (39, 64)       | 0.5 (0.3, 0.8) | 4.8 (4.1, 5.6)    | 0.3 (0.2, 0.5) | 0.9 (0.7, 1.1)    |
| Belize   | Women | Ages 20 to 44     | 0.0242 | 2.3 (0.6, 4.0) | 29 (28, 31) | 0 (0, 0)       | 2 (2, 3)       | 0 (0, 0)    | 3 (2, 3)       | 5 (3, 7)       | 55 (41, 67)      | 1 (1, 2)    | 61 (46, 74)       | 5.9 (3.5, 8.8) | 34.3 (25.6, 41.8) | 1.5 (0.9, 2.1) | 22.8 (17.1, 27.6) |
| Belize   | Women | Ages 45 to 64     | 0.0194 | 1.1 (0.3, 1.9) | 31 (30, 33) | 0 (0, 1)       | 6 (4, 8)       | 0 (0, 0)    | 6 (5, 8)       | 23 (14, 33)    | 304 (215, 389)   | 6 (3, 9)    | 333 (238, 420)    | 2.6 (1.5, 3.8) | 18.1 (12.8, 23.2) | 1.2 (0.6, 1.8) | 13.5 (9.7, 17.1)  |
| Belize   | Women | Ages 65 and older | 0.0248 | 0.8 (0.2, 1.4) | 27 (25, 28) | 1 (1, 1)       | 8 (6, 10)      | 0 (0, 0)    | 9 (7, 11)      | 128 (83, 175)  | 1223 (880, 1542) | 21 (13, 31) | 1372 (1039, 1698) | 0.7 (0.5, 1.0) | 8.3 (6.0, 10.5)   | 0.7 (0.4, 1.0) | 4.4 (3.3, 5.4)    |
| Belize   | Women | Overall           | 0.0685 | 1.4 (0.4, 2.5) | 29 (27, 30) | 1 (1, 2)       | 16 (13, 19)    | 0 (0, 0)    | 18 (15, 21)    | 22 (14, 30)    | 237 (195, 277)   | 4 (3, 6)    | 263 (217, 306)    | 1.1 (0.7, 1.5) | 12.0 (9.9, 14.0)  | 0.9 (0.6, 1.3) | 6.9 (5.6, 8.0)    |
| Belize   | Men   | Ages 20 to 44     | 0.0246 | 2.5 (0.7, 4.2) | 27 (26, 28) | 0 (0, 0)       | 2 (2, 3)       | 0 (0, 0)    | 3 (2, 3)       | 7 (4, 10)      | 51 (38, 62)      | 1 (0, 1)    | 59 (45, 71)       | 6.2 (3.6, 9.0) | 35.8 (26.6, 43.4) | 1.1 (0.5, 1.9) | 22.2 (16.8, 26.7) |
| Belize   | Men   | Ages 45 to 64     | 0.0189 | 1.2 (0.3, 2.0) | 28 (27, 29) | 1 (0, 1)       | 6 (4, 7)       | 0 (0, 0)    | 7 (5, 8)       | 43 (26, 61)    | 300 (205, 389)   | 4 (2, 6)    | 347 (246, 443)    | 2.7 (1.6, 3.8) | 18.8 (12.8, 24.3) | 0.8 (0.4, 1.3) | 11.4 (8.1, 14.5)  |
| Belize   | Men   | Ages 65 and older | 0.0241 | 0.9 (0.2, 1.5) | 25 (24, 27) | 1 (1, 1)       | 5 (4, 6)       | 0 (0, 0)    | 6 (4, 7)       | 164 (105, 224) | 851 (610, 1094)  | 16 (10, 23) | 1031 (771, 1279)  | 0.9 (0.6, 1.3) | 8.8 (6.3, 11.3)   | 0.5 (0.3, 0.8) | 3.8 (2.8, 4.7)    |
| Belize   | Men   | Overall           | 0.0676 | 1.6 (0.4, 2.7) | 27 (25, 28) | 2 (1, 3)       | 13 (10, 15)    | 0 (0, 0)    | 15 (12, 18)    | 31 (19, 42)    | 190 (155, 225)   | 3 (2, 4)    | 223 (181, 263)    | 1.5 (0.9, 2.1) | 13.9 (11.3, 16.5) | 0.7 (0.4, 1.0) | 6.6 (5.4, 7.8)    |
| Belize   | Both  | Overall           | 0.136  | 1.5 (0.4, 2.6) | 28 (26, 29) | 4 (2, 5)       | 29 (25, 33)    | 0 (0, 1)    | 33 (28, 38)    | 26 (16, 36)    | 213 (185, 241)   | 4 (2, 5)    | 243 (205, 276)    | 1.3 (0.8, 1.8) | 12.8 (11.1, 14.4) | 0.8 (0.5, 1.1) | 6.7 (5.7, 7.7)    |
| Benin    | Women | Ages 20 to 44     | 0.627  | 0.3 (0.1, 0.5) | 23 (23, 24) | 1 (0, 1)       | 8 (6, 10)      | 0 (0, 0)    | 8 (6, 11)      | 1 (0, 1)       | 7 (5, 9)         | 0 (0, 0)    | 8 (6, 10)         | 0.6 (0.3, 0.9) | 9.2 (6.7, 11.8)   | 0.1 (0.1, 0.2) | 3.8 (2.8, 4.8)    |
| Benin    | Women | Ages 45 to 64     | 0.464  | 0.1 (0.0, 0.2) | 25 (24, 26) | 2 (1, 3)       | 16 (11, 21)    | 0 (0, 0)    | 18 (12, 23)    | 4 (2, 6)       | 34 (23, 45)      | 0 (0, 1)    | 38 (27, 50)       | 0.3 (0.2, 0.5) | 5.4 (3.6, 7.2)    | 0.1 (0.1, 0.2) | 2.1 (1.4, 2.7)    |
| Benin    | Women | Ages 65 and older | 0.59   | 0.1 (0.0, 0.2) | 22 (19, 25) | 2 (1, 4)       | 19 (11, 26)    | 0 (0, 0)    | 21 (14, 29)    | 15 (8, 23)     | 115 (71, 160)    | 1 (0, 1)    | 131 (85, 178)     | 0.1 (0.1, 0.2) | 2.8 (1.7, 3.9)    | 0.1 (0.1, 0.2) | 0.9 (0.6, 1.2)    |
| Benin    | Women | Overall           | 1.68   | 0.2 (0.1, 0.3) | 23 (22, 25) | 5 (3, 7)       | 42 (33, 51)    | 0 (0, 1)    | 47 (37, 57)    | 3 (1, 4)       | 25 (19, 30)      | 0 (0, 0)    | 28 (22, 34)       | 0.4 (0.3, 0.5) | 4.1 (3.1, 4.9)    | 0.1 (0.1, 0.2) | 1.4 (1.1, 1.7)    |
| Benin    | Men   | Ages 20 to 44     | 0.614  | 0.3 (0.1, 0.5) | 22 (21, 23) | 1 (1, 2)       | 9 (6, 11)      | 0 (0, 0)    | 10 (7, 13)     | 1 (1, 2)       | 9 (6, 11)        | 0 (0, 0)    | 10 (7, 12)        | 0.6 (0.3, 0.9) | 9.6 (6.8, 12.3)   | 0.1 (0.1, 0.2) | 3.6 (2.6, 4.6)    |
| Benin    | Men   | Ages 45 to 64     | 0.416  | 0.1 (0.0, 0.3) | 23 (22, 24) | 2 (1, 3)       | 19 (12, 26)    | 0 (0, 0)    | 22 (14, 28)    | 5 (3, 7)       | 47 (29, 62)      | 0 (0, 0)    | 52 (34, 68)       | 0.3 (0.2, 0.5) | 5.5 (3.5, 7.4)    | 0.1 (0.1, 0.2) | 2.3 (1.5, 3.0)    |
| Benin    | Men   | Ages 65 and older | 0.526  | 0.1 (0.0, 0.2) | 22 (20, 24) | 2 (1, 3)       | 16 (11, 22)    | 0 (0, 0)    | 18 (12, 24)    | 18 (9, 27)     | 151 (99, 206)    | 1 (0, 1)    | 170 (115, 225)    | 0.2 (0.1, 0.3) | 3.4 (2.3, 4.7)    | 0.1 (0.1, 0.2) | 1.2 (0.8, 1.6)    |
| Benin    | Men   | Overall           | 1.56   | 0.2 (0.1, 0.3) | 22 (21, 23) | 5 (3, 8)       | 44 (34, 54)    | 0 (0, 0)    | 50 (39, 60)    | 3 (2, 5)       | 29 (22, 34)      | 0 (0, 0)    | 32 (25, 38)       | 0.3 (0.1, 0.4) | 4.9 (3.7, 5.9)    | 0.1 (0.1, 0.2) | 1.8 (1.4, 2.2)    |
| Benin    | Both  | Overall           | 3.24   | 0.2 (0.1, 0.3) | 23 (21, 24) | 10 (5, 15)     | 87 (73, 100)   | 1 (0, 1)    | 97 (81, 112)   | 3 (2, 5)       | 27 (22, 31)      | 0 (0, 0)    | 30 (25, 35)       | 0.2 (0.1, 0.4) | 4.5 (3.7, 5.1)    | 0.1 (0.1, 0.2) | 1.6 (1.3, 1.8)    |
| Bhutan   | Women | Ages 20 to 44     | 0.0585 | 0.3 (0.1, 0.5) | 23 (21, 25) | 0 (0, 0)       | 1 (0, 1)       | 0 (0, 0)    | 1 (0, 1)       | 1 (0, 1)       | 6 (4, 8)         | 0 (0, 0)    | 7 (5, 9)          | 0.6 (0.3, 0.9) | 9.0 (6.3, 11.8)   | 0.2 (0.1, 0.3) | 3.0 (2.2, 3.9)    |
| Bhutan   | Women | Ages 45 to 64     | 0.0449 | 0.1 (0.0, 0.2) | 23 (21, 26) | 0 (0, 0)       | 2 (1, 2)       | 0 (0, 0)    | 2 (1, 2)       | 3 (2, 5)       | 34 (23, 46)      | 1 (0, 1)    | 38 (26, 50)       | 0.3 (0.2, 0.5) | 5.3 (3.5, 7.1)    | 0.2 (0.1, 0.3) | 2.1 (1.5, 2.8)    |
| Bhutan   | Women | Ages 65 and older | 0.056  | 0.1 (0.0, 0.2) | 21 (18, 24) | 0 (0, 0)       | 1 (1, 2)       | 0 (0, 0)    | 1 (1, 2)       | 9 (4, 13)      | 77 (40, 113)     | 1 (1, 2)    | 86 (50, 124)      | 0.1 (0.0, 0.1) | 1.7 (0.9, 2.5)    | 0.1 (0.1, 0.2) | 0.6 (0.3, 0.8)    |
| Bhutan   | Women | Overall           | 0.159  | 0.2 (0.0, 0.3) | 22 (20, 25) | 0 (0, 1)       | 3 (3, 4)       | 0 (0, 0)    | 4 (3, 5)       | 2 (1, 3)       | 22 (16, 27)      | 0 (0, 1)    | 24 (19, 30)       | 0.1 (0.1, 0.2) | 3.0 (2.3, 3.8)    | 0.1 (0.1, 0.2) | 1.1 (0.8, 1.3)    |
| Bhutan   | Men   | Ages 20 to 44     | 0.0791 | 0.3 (0.1, 0.5) | 23 (21, 24) | 0 (0, 0)       | 1 (1, 1)       | 0 (0, 0)    | 1 (1, 2)       | 1 (0, 2)       | 9 (6, 11)        | 0 (0, 0)    | 10 (7, 13)        | 0.6 (0.3, 1.0) | 9.5 (6.8, 12.5)   | 0.2 (0.1, 0.3) | 3.8 (2.8, 5.0)    |
| Bhutan   | Men   | Ages 45 to 64     | 0.0524 | 0.2 (0.0, 0.3) | 23 (22, 25) | 0 (0, 0)       | 2 (2, 3)       | 0 (0, 0)    | 3 (2, 4)       | 5 (3, 8)       | 46 (31, 62)      | 1 (0, 1)    | 52 (36, 68)       | 0.3 (0.2, 0.5) | 5.5 (3.7, 7.3)    | 0.2 (0.1, 0.4) | 2.2 (1.5, 2.8)    |
| Bhutan   | Men   | Ages 65 and older | 0.065  | 0.1 (0.0, 0.2) | 22 (20, 24) | 0 (0, 1)       | 3 (2, 4)       | 0 (0, 0)    | 3 (2, 4)       | 21 (11, 32)    | 156 (104, 206)   | 2 (1, 3)    | 179 (125, 232)    | 0.2 (0.1, 0.3) | 3.1 (2.1, 4.1)    | 0.2 (0.1, 0.3) | 1.1 (0.8, 1.5)    |
| Bhutan   | Men   | Overall           | 0.197  | 0.2 (0.1, 0.3) | 23 (21, 24) | 1 (0, 1)       | 6 (5, 7)       | 0 (0, 0)    | 7 (6, 8)       | 4 (2, 6)       | 32 (26, 38)      | 0 (0, 1)    | 36 (29, 43)       | 0.3 (0.1, 0.4) | 4.4 (3.5, 5.2)    | 0.2 (0.1, 0.3) | 1.6 (1.3, 1.9)    |
| Bhutan   | Both  | Overall           | 0.356  | 0.2 (0.0, 0.3) | 22 (20, 25) | 1 (1, 2)       | 10 (8, 11)     | 0 (0, 0)    | 11 (9, 13)     | 3 (2, 5)       | 27 (23, 32)      | 0 (0, 1)    | 31 (26, 36)       | 0.2 (0.1, 0.3) | 3.8 (3.1, 4.4)    | 0.2 (0.1, 0.3) | 1.4 (1.2, 1.6)    |
| Bolivia  | Women | Ages 20 to 44     | 0.731  | 0.7 (0.2, 1.2) | 26 (25, 27) | 4 (3, 6)       | 17 (13, 22)    | 1 (0, 1)    | 22 (17, 28)    | 3 (2, 5)       | 13 (10, 17)      | 1 (0, 1)    | 17 (13, 22)       | 2.1 (1.2, 3.0) | 15.6 (11.4, 20.0) | 0.6 (0.3, 0.9) | 5.3 (4.0, 6.7)    |
| Bolivia  | Women | Ages 45 to 64     | 0.684  | 0.3 (0.1, 0.6) | 28 (27, 29) | 8 (5, 11)      | 57 (38, 76)    | 2 (1, 3)    | 67 (46, 87)    | 11 (7, 16)     | 83 (55, 111)     | 3 (2, 5)    | 97 (67, 127)      | 1.1 (0.7, 1.6) | 8.2 (5.5, 11.0)   | 0.5 (0.3, 0.8) | 4.1 (2.8, 5.3)    |
| Bolivia  | Women | Ages 65 and older | 0.826  | 0.2 (0.1, 0.4) | 26 (23, 29) | 15 (9, 22)     | 71 (51, 94)    | 3 (2, 4)    | 90 (65, 114)   | 59 (35, 84)    | 276 (195, 361)   | 11 (6, 17)  | 346 (251, 441)    | 0.5 (0.3, 0.8) | 4.5 (3.2, 5.9)    | 0.5 (0.3, 0.8) | 1.9 (1.4, 2.4)    |
| Bolivia  | Women | Overall           | 2.24   | 0.4 (0.1, 0.8) | 27 (25, 28) | 27 (16, 38)    | 145 (118, 174) | 6 (3, 8)    | 178 (144, 215) | 12 (7, 17)     | 65 (53, 78)      | 3 (1, 4)    | 80 (64, 96)       | 0.7 (0.4, 1.0) | 6.1 (4.9, 7.3)    | 0.5 (0.3, 0.8) | 2.6 (2.1, 3.2)    |
| Bolivia  | Men   | A                 |        |                |             |                |                |             |                |                |                  |             |                   |                |                   |                |                   |

|                   |       |                   |        |                |             |                   |                   |               |                    |               |                |            |                |                |                   |                |                 |
|-------------------|-------|-------------------|--------|----------------|-------------|-------------------|-------------------|---------------|--------------------|---------------|----------------|------------|----------------|----------------|-------------------|----------------|-----------------|
| Botswana          | Men   | Ages 20 to 44     | 0.192  | 1.1 (0.3, 1.9) | 22 (21, 23) | 1 (0, 1)          | 7 (5, 8)          | 0 (0, 0)      | 7 (5, 9)           | 2 (1, 4)      | 22 (15, 28)    | 0 (0, 0)   | 24 (18, 31)    | 1.3 (0.6, 2.1) | 18.0 (12.6, 23.2) | 0.5 (0.3, 0.9) | 7.9 (5.8, 10.2) |
| Botswana          | Men   | Ages 45 to 64     | 0.123  | 0.5 (0.1, 0.9) | 23 (22, 24) | 1 (0, 2)          | 9 (6, 13)         | 0 (0, 0)      | 11 (7, 14)         | 8 (4, 12)     | 76 (51, 102)   | 2 (1, 3)   | 86 (60, 112)   | 0.7 (0.3, 1.1) | 9.8 (6.6, 13.1)   | 0.5 (0.2, 0.8) | 4.2 (2.9, 5.5)  |
| Botswana          | Men   | Ages 65 and older | 0.144  | 0.4 (0.1, 0.7) | 22 (20, 24) | 1 (0, 1)          | 7 (4, 9)          | 0 (0, 0)      | 8 (5, 10)          | 26 (13, 40)   | 193 (127, 258) | 5 (3, 8)   | 224 (153, 294) | 0.3 (0.2, 0.5) | 5.3 (3.5, 7.1)    | 0.4 (0.2, 0.6) | 1.9 (1.3, 2.5)  |
| Botswana          | Men   | Overall           | 0.459  | 0.7 (0.2, 1.2) | 22 (21, 23) | 3 (1, 4)          | 22 (18, 26)       | 0 (0, 1)      | 25 (21, 30)        | 5 (3, 8)      | 49 (40, 57)    | 1 (1, 2)   | 55 (45, 65)    | 0.6 (0.3, 0.9) | 8.8 (7.2, 10.4)   | 0.4 (0.2, 0.7) | 3.5 (2.8, 4.1)  |
| Botswana          | Both  | Overall           | 0.91   | 0.7 (0.2, 1.1) | 24 (23, 26) | 7 (5, 9)          | 48 (42, 54)       | 1 (1, 1)      | 56 (48, 63)        | 7 (5, 10)     | 53 (46, 60)    | 1 (1, 2)   | 61 (53, 69)    | 0.8 (0.5, 1.0) | 8.4 (7.3, 9.5)    | 0.5 (0.4, 0.7) | 3.8 (3.2, 4.2)  |
|                   |       |                   |        |                |             |                   |                   |               |                    |               |                |            |                |                |                   |                |                 |
|                   |       |                   |        |                |             |                   |                   |               |                    |               |                |            |                |                |                   |                |                 |
|                   |       |                   |        |                |             |                   |                   |               |                    |               |                |            |                |                |                   |                |                 |
|                   |       |                   |        |                |             |                   |                   |               |                    |               |                |            |                |                |                   |                |                 |
| Brazil            | Women | Ages 20 to 44     | 16.8   | 0.9 (0.7, 1.2) | 25 (24, 26) | 63 (37, 93)       | 285 (203, 364)    | 12 (8, 18)    | 360 (268, 450)     | 2 (1, 3)      | 9 (7, 12)      | 0 (0, 1)   | 12 (9, 15)     | 2.1 (1.3, 3.2) | 18.3 (13.1, 23.4) | 0.5 (0.3, 0.7) | 5.1 (3.8, 6.4)  |
| Brazil            | Women | Ages 45 to 64     | 19.6   | 0.5 (0.3, 0.6) | 28 (27, 29) | 285 (168, 414)    | 1252 (872, 1681)  | 55 (33, 82)   | 1591 (1167, 2053)  | 14 (9, 21)    | 64 (44, 86)    | 3 (2, 4)   | 81 (59, 105)   | 1.4 (0.8, 2.0) | 9.6 (6.7, 12.9)   | 0.5 (0.3, 0.7) | 3.7 (2.7, 4.7)  |
| Brazil            | Women | Ages 65 and older | 21.6   | 0.3 (0.3, 0.4) | 27 (26, 28) | 563 (335, 836)    | 2033 (1506, 2579) | 76 (46, 110)  | 2672 (2019, 3292)  | 73 (44, 109)  | 264 (196, 335) | 10 (6, 14) | 347 (263, 428) | 0.5 (0.3, 0.8) | 4.4 (3.2, 5.5)    | 0.4 (0.2, 0.6) | 1.7 (1.3, 2.0)  |
| Brazil            | Women | Overall           | 58.1   | 0.6 (0.4, 0.7) | 26 (25, 27) | 910 (546, 1325)   | 3570 (2861, 4281) | 143 (87, 200) | 4623 (3783, 5494)  | 16 (9, 23)    | 61 (49, 74)    | 2 (2, 3)   | 80 (65, 95)    | 0.7 (0.4, 1.0) | 5.8 (4.7, 7.0)    | 0.4 (0.3, 0.6) | 2.2 (1.8, 2.6)  |
| Brazil            | Men   | Ages 20 to 44     | 16.7   | 1.0 (0.7, 1.2) | 25 (25, 26) | 150 (93, 221)     | 429 (310, 544)    | 12 (7, 17)    | 591 (445, 738)     | 5 (3, 7)      | 14 (10, 18)    | 0 (0, 1)   | 20 (15, 25)    | 2.6 (1.6, 3.8) | 19.5 (14.1, 24.8) | 0.7 (0.3, 1.0) | 6.7 (5.1, 8.4)  |
| Brazil            | Men   | Ages 45 to 64     | 17.9   | 0.5 (0.4, 0.6) | 27 (26, 28) | 512 (298, 738)    | 1369 (948, 1780)  | 67 (39, 97)   | 1945 (1450, 2460)  | 29 (17, 41)   | 77 (53, 100)   | 4 (2, 5)   | 109 (81, 138)  | 1.4 (0.8, 2.0) | 10.2 (7.1, 13.3)  | 0.7 (0.4, 1.0) | 3.4 (2.5, 4.3)  |
| Brazil            | Men   | Ages 65 and older | 19.2   | 0.4 (0.3, 0.5) | 26 (25, 26) | 499 (328, 689)    | 1460 (1004, 1878) | 60 (38, 84)   | 2019 (1518, 2513)  | 84 (55, 116)  | 245 (168, 315) | 10 (6, 14) | 339 (255, 421) | 0.5 (0.3, 0.7) | 4.8 (3.3, 6.2)    | 0.4 (0.2, 0.5) | 1.5 (1.1, 1.8)  |
| Brazil            | Men   | Overall           | 53.7   | 0.6 (0.5, 0.8) | 26 (25, 27) | 1161 (718, 1634)  | 3255 (2634, 3854) | 139 (87, 194) | 4555 (3662, 5388)  | 22 (13, 30)   | 61 (49, 72)    | 3 (2, 4)   | 85 (68, 100)   | 0.8 (0.5, 1.2) | 7.1 (5.8, 8.4)    | 0.5 (0.3, 0.7) | 2.3 (1.8, 2.7)  |
| Brazil            | Both  | Overall           | 112    | 0.6 (0.5, 0.8) | 26 (25, 27) | 2071 (1282, 2957) | 6825 (5874, 7801) | 82 (176, 391) | 9178 (7676, 10735) | 19 (11, 26)   | 61 (53, 70)    | 3 (2, 4)   | 82 (69, 96)    | 0.8 (0.5, 1.1) | 6.4 (5.5, 7.3)    | 0.5 (0.3, 0.6) | 2.2 (1.9, 2.6)  |
|                   |       |                   |        |                |             |                   |                   |               |                    |               |                |            |                |                |                   |                |                 |
|                   |       |                   |        |                |             |                   |                   |               |                    |               |                |            |                |                |                   |                |                 |
|                   |       |                   |        |                |             |                   |                   |               |                    |               |                |            |                |                |                   |                |                 |
|                   |       |                   |        |                |             |                   |                   |               |                    |               |                |            |                |                |                   |                |                 |
| Brunei Darussalam | Women | Ages 20 to 44     | 0.0403 | 0.8 (0.2, 1.3) | 22 (18, 26) | 0 (0, 0)          | 1 (0, 1)          | 0 (0, 0)      | 1 (1, 1)           | 1 (0, 1)      | 10 (6, 13)     | 0 (0, 0)   | 11 (7, 14)     | 0.9 (0.5, 1.4) | 14.4 (9.0, 19.4)  | 0.2 (0.1, 0.3) | 5.1 (3.3, 6.9)  |
| Brunei Darussalam | Women | Ages 45 to 64     | 0.0331 | 0.4 (0.1, 0.6) | 24 (20, 28) | 0 (0, 0)          | 2 (1, 3)          | 0 (0, 0)      | 2 (2, 3)           | 3 (2, 5)      | 67 (44, 89)    | 1 (0, 1)   | 71 (47, 94)    | 0.5 (0.3, 0.8) | 7.9 (5.2, 10.6)   | 0.2 (0.1, 0.3) | 4.0 (2.7, 5.3)  |
| Brunei Darussalam | Women | Ages 65 and older | 0.0413 | 0.3 (0.1, 0.5) | 23 (17, 28) | 0 (0, 0)          | 3 (2, 4)          | 0 (0, 0)      | 3 (2, 4)           | 26 (13, 40)   | 408 (300, 528) | 4 (2, 6)   | 437 (327, 556) | 0.2 (0.1, 0.3) | 3.4 (2.5, 4.4)    | 0.1 (0.1, 0.2) | 1.8 (1.3, 2.3)  |
| Brunei Darussalam | Women | Overall           | 0.115  | 0.5 (0.1, 0.8) | 23 (18, 27) | 0 (0, 1)          | 6 (5, 7)          | 0 (0, 0)      | 6 (5, 7)           | 3 (2, 4)      | 51 (41, 61)    | 1 (0, 1)   | 55 (44, 65)    | 0.3 (0.1, 0.4) | 5.0 (4.0, 5.9)    | 0.2 (0.1, 0.2) | 2.5 (2.0, 3.0)  |
| Brunei Darussalam | Men   | Ages 20 to 44     | 0.0372 | 0.9 (0.2, 1.5) | 24 (21, 26) | 0 (0, 0)          | 1 (1, 2)          | 0 (0, 0)      | 1 (1, 2)           | 2 (1, 4)      | 16 (10, 22)    | 0 (0, 0)   | 19 (13, 25)    | 1.0 (0.5, 1.6) | 16.1 (10.0, 21.8) | 0.1 (0.1, 0.2) | 5.5 (3.7, 7.3)  |
| Brunei Darussalam | Men   | Ages 45 to 64     | 0.0372 | 0.4 (0.1, 0.7) | 25 (22, 28) | 0 (0, 0)          | 4 (3, 5)          | 0 (0, 0)      | 4 (3, 6)           | 8 (4, 12)     | 107 (71, 143)  | 1 (0, 1)   | 116 (80, 152)  | 0.5 (0.3, 0.8) | 8.6 (5.8, 11.5)   | 0.1 (0.1, 0.2) | 4.1 (2.8, 5.4)  |
| Brunei Darussalam | Men   | Ages 65 and older | 0.0389 | 0.3 (0.1, 0.5) | 24 (20, 27) | 0 (0, 0)          | 3 (2, 4)          | 0 (0, 0)      | 3 (2, 4)           | 31 (16, 48)   | 442 (312, 569) | 5 (3, 8)   | 479 (347, 606) | 0.2 (0.1, 0.3) | 3.9 (2.8, 5.0)    | 0.1 (0.0, 0.2) | 1.9 (1.4, 2.4)  |
| Brunei Darussalam | Men   | Overall           | 0.113  | 0.5 (0.1, 0.9) | 24 (21, 27) | 1 (0, 1)          | 8 (7, 10)         | 0 (0, 0)      | 9 (7, 11)          | 6 (3, 9)      | 73 (58, 88)    | 1 (0, 1)   | 80 (64, 95)    | 0.4 (0.2, 0.6) | 6.2 (4.9, 7.5)    | 0.1 (0.1, 0.2) | 2.9 (2.4, 3.5)  |
| Brunei Darussalam | Both  | Overall           | 0.228  | 0.5 (0.1, 0.9) | 23 (20, 27) | 1 (1, 2)          | 14 (12, 16)       | 0 (0, 0)      | 15 (13, 17)        | 4 (2, 7)      | 62 (53, 71)    | 1 (0, 1)   | 67 (57, 77)    | 0.3 (0.2, 0.5) | 5.6 (4.8, 6.4)    | 0.1 (0.1, 0.2) | 2.7 (2.3, 3.1)  |
|                   |       |                   |        |                |             |                   |                   |               |                    |               |                |            |                |                |                   |                |                 |
|                   |       |                   |        |                |             |                   |                   |               |                    |               |                |            |                |                |                   |                |                 |
|                   |       |                   |        |                |             |                   |                   |               |                    |               |                |            |                |                |                   |                |                 |
|                   |       |                   |        |                |             |                   |                   |               |                    |               |                |            |                |                |                   |                |                 |
|                   |       |                   |        |                |             |                   |                   |               |                    |               |                |            |                |                |                   |                |                 |
| Bulgaria          | Women | Ages 20 to 44     | 0.541  | 0.4 (0.3, 0.5) | 24 (22, 25) | 2 (1, 2)          | 4 (3, 5)          | 0 (0, 0)      | 6 (4, 7)           | 1 (1, 2)      | 4 (3, 5)       | 0 (0, 0)   | 5 (4, 7)       | 1.2 (0.8, 1.7) | 10.8 (7.7, 14.0)  | 0.3 (0.2, 0.4) | 1.9 (1.4, 2.4)  |
| Bulgaria          | Women | Ages 45 to 64     | 1.09   | 0.2 (0.1, 0.2) | 28 (26, 30) | 15 (9, 22)        | 21 (14, 27)       | 2 (1, 4)      | 39 (28, 50)        | 14 (8, 20)    | 19 (13, 26)    | 2 (1, 3)   | 36 (26, 46)    | 0.8 (0.5, 1.2) | 6.1 (4.0, 8.3)    | 0.2 (0.1, 0.3) | 1.2 (0.8, 1.5)  |
| Bulgaria          | Women | Ages 65 and older | 1.33   | 0.1 (0.1, 0.2) | 27 (26, 29) | 90 (50, 134)      | 64 (47, 81)       | 5 (3, 7)      | 159 (108, 211)     | 114 (64, 170) | 81 (59, 103)   | 6 (4, 9)   | 201 (137, 267) | 0.3 (0.2, 0.5) | 3.2 (2.3, 4.0)    | 0.2 (0.1, 0.3) | 0.7 (0.5, 0.6)  |
| Bulgaria          | Women | Overall           | 2.95   | 0.2 (0.2, 0.3) | 26 (24, 28) | 107 (61, 157)     | 89 (71, 107)      | 8 (5, 11)     | 204 (146, 265)     | 36 (21, 53)   | 30 (24, 36)    | 3 (2, 4)   | 69 (49, 90)    | 0.4 (0.2, 0.5) | 3.7 (3.0, 4.5)    | 0.2 (0.1, 0.3) | 0.5 (0.4, 0.7)  |
| Bulgaria          | Men   | Ages 20 to 44     | 0.569  | 0.4 (0.3, 0.5) | 26 (25, 27) | 6 (4, 9)          | 5 (4, 7)          | 0 (0, 0)      | 12 (8, 16)         | 6 (3, 8)      | 5 (3, 6)       | 0 (0, 0)   | 11 (8, 14)     | 1.5 (0.9, 2.1) | 11.8 (8.3, 15.3)  | 0.2 (0.1, 0.4) | 2.0 (1.4, 2.7)  |
| Bulgaria          | Men   | Ages 45 to 64     | 0.998  | 0.2 (0.2, 0.3) | 28 (27, 29) | 43 (26, 62)       | 30 (20, 40)       | 3 (2, 4)      | 75 (54, 98)        | 43 (26, 62)   | 30 (20, 40)    | 3 (2, 4)   | 76 (54, 98)    | 0.9 (0.5, 1.3) | 6.4 (4.4, 8.6)    | 0.2 (0.1, 0.2) | 1.2 (0.8, 1.5)  |
| Bulgaria          | Men   | Ages 65 and older | 1.09   | 0.1 (0.1, 0.2) | 26 (25, 28) | 85 (50, 121)      | 47 (33, 61)       | 5 (3, 7)      | 137 (94, 181)      | 159 (94, 225) | 87 (62, 114)   | 9 (5, 13)  | 255 (175, 335) | 0.4 (0.2, 0.6) | 3.5 (2.4, 4.5)    | 0.1 (0.1, 0.2) | 0.5 (0.4, 0.7)  |
| Bulgaria          | Men   | Overall           | 2.65   | 0.3 (0.2, 0.3) | 27 (25, 28) | 135 (80, 192)     | 82 (65, 99)       | 8 (5, 11)     | 225 (161, 293)     | 51 (30, 72)   | 31 (25, 37)    | 3 (2, 4)   | 85 (61, 110)   | 0.5 (0.3, 0.7) | 4.4 (3.5, 5.3)    | 0.1 (0.1, 0.2) | 0.7 (0.5, 0.9)  |
| Bulgaria          | Both  | Overall           | 5.61   | 0.3 (0.2, 0.3) | 26 (25, 28) | 242 (140, 343)    | 171 (146, 197)    | 15 (9, 22)    | 428 (311, 548)     | 43 (25, 61)   | 31 (26, 35)    | 3 (2, 4)   | 76 (55, 98)    | 0.4 (0.2, 0.6) | 4.0 (3.4, 4.6)    | 0.2 (0.1, 0.3) | 0.6 (0.4, 0.8)  |
|                   |       |                   |        |                |             |                   |                   |               |                    |               |                |            |                |                |                   |                |                 |
|                   |       |                   |        |                |             |                   |                   |               |                    |               |                |            |                |                |                   |                |                 |
|                   |       |                   |        |                |             |                   |                   |               |                    |               |                |            |                |                |                   |                |                 |
|                   |       |                   |        |                |             |                   |                   |               |                    |               |                |            |                |                |                   |                |                 |
|                   |       |                   |        |                |             |                   |                   |               |                    |               |                |            |                |                |                   |                |                 |
| Burkina Faso      | Women | Ages 20 to 44     | 1.18   | 0.3 (0.1, 0.6) | 22 (21, 23) | 1 (1, 2)          | 34 (23, 44)       | 0 (0, 0)      | 35 (24, 45)        | 1 (0, 1)      | 17 (12, 22)    | 0 (0, 0)   | 18 (12, 23)    | 0.7 (0.3, 1.0) | 10.2 (7.0, 13.2)  | 0.1 (0.1, 0.2) | 7.4 (5.1, 9.6)  |
| Burkina Faso      | Women | Ages 45 to 64     | 0.81   | 0.2 (0.0, 0.3) | 22 (20, 23) | 3 (2, 5)          | 52 (35, 70)       | 0 (0, 1)      | 56 (38, 74)        | 4 (2, 6)      | 64 (43, 87)    | 0 (0, 1)   | 69 (47, 92)    | 0.4 (0.2, 0.6) | 5.8 (3.9, 7.8)    | 0.2 (0.1, 0.2) | 3.2 (2.2, 4.3)  |
| Burkina Faso      | Women | Ages 65 and older | 1      | 0.1 (0.0, 0.2) | 20 (18, 22) | 0 (0, 0)          | 0 (0, 0)          | 0 (0, 0)      | 0 (0, 0)           | 0 (0, 0)      | 0 (0, 0)       | 0 (0, 0)   | 0 (0, 0)       | 0.0 (0.0, 0.0) | 0.0 (0.0, 0.0)    | 0.0 (0.0, 0.0) | 0.0 (0.0, 0.0)  |
| Burkina Faso      | Women | Overall           | 2.99   | 0.2 (0.1, 0.4) | 21 (20, 23) | 4 (2, 7)          | 86 (66, 106)      | 0 (0, 1)      | 91 (70, 112)       | 1 (1, 2)      | 29 (22, 35)    | 0 (0, 0)   | 30 (23, 37)    | 0.1 (0.1, 0.2) | 3.4 (2.6, 4.2)    | 0.1 (0.1, 0.2) | 1.7 (1.3, 2.1)  |
| Burkina Faso      | Men   | Ages 20 to 44     | 1.18   | 0.4 (0.1, 0.7) | 21 (19, 23) | 1 (1, 2)          | 15 (10, 19)       | 0 (0, 0)      | 16 (11, 21)        | 1 (0, 1)      | 8 (5, 10)      | 0 (0, 0)   | 8 (6, 11)      | 0.6 (0.3, 0.9) | 8.5 (5.6, 11.2)   | 0.1 (0.1, 0.2) | 4.3 (3.0, 5.6)  |
| Burkina Faso      | Men   | Ages 45 to 64     | 0.639  | 0.2 (0.0, 0.3) | 22 (20, 23) | 4 (2, 5)          | 31 (20, 42)       | 0 (0, 0)      | 35 (24, 46)        | 6 (3, 9)      | 48 (32, 65)    | 0 (0, 1)   | 54 (38, 71)    | 0.4 (0.2, 0.5) | 5.9 (3.9, 8.0)    | 0.2 (0.1, 0.3) | 2.3 (1.6, 3.0)  |
| Burkina Faso      | Men   | Ages 65 and older | 0.874  | 0.1 (0.0, 0.2) | 21 (19, 23) | 3 (2, 5)          | 22 (14, 29)       | 0 (0, 0)      | 25 (17, 33)        | 21 (11, 32)   | 151 (98, 206)  | 1 (1, 2)   | 173 (120, 230) | 0.2 (0.1, 0.3) | 3.8 (2.5, 5.2)    | 0.1 (0.1, 0.2) | 1.2 (0.8, 1.6)  |
| Burkina Faso      | Men   | Overall           | 2.69   | 0.2 (0.1, 0.4) | 21 (19, 23) | 8 (4, 12)         | 67 (53, 81)       | 0 (0, 1)      | 75 (60, 91)        | 3 (1, 4)      | 25 (20, 30)    | 0 (0, 0)   | 28 (22, 34)    | 0.3 (0.1, 0.4) | 5.3 (4.2, 6.4)    | 0.2 (0.1, 0.2) | 1.9 (1.5, 2.3)  |
| Burkina Faso      | Both  | Overall           | 5.68   | 0.2 (0.1, 0.4) | 21 (20, 23) | 12 (6, 18)        | 153 (128, 177)    | 1 (0, 1)      | 166 (139, 192)     | 2 (1, 3)      | 27 (22, 31)    | 0 (0, 0)   | 29 (24, 34)    | 0.2 (0.1, 0.3) | 4.0 (3.4, 4.6)    | 0.1 (0.1, 0.2) | 1.8 (1.5, 2.1)  |
|                   |       |                   |        |                |             |                   |                   |               |                    |               |                |            |                |                |                   |                |                 |
|                   |       |                   |        |                |             |                   |                   |               |                    |               |                |            |                |                |                   |                |                 |
|                   |       |                   |        |                |             |                   |                   |               |                    |               |                |            |                |                |                   |                |                 |
|                   |       |                   |        |                |             |                   |                   |               |                    |               |                |            |                |                |                   |                |                 |
|                   |       |                   |        |                |             |                   |                   |               |                    |               |                |            |                |                |                   |                |                 |
|                   |       |                   |        |                |             |                   |                   |               |                    |               |                |            |                |                |                   |                |                 |
| Burundi           | Women | Ages 20 to 44     | 0.699  | 0.6 (0.2, 0.9) | 21 (17, 25) | 2 (1, 3)          | 13 (9, 18)        | 0 (0, 0)      | 15 (11, 20)        | 1 (1, 2)      | 12 (8, 16)     | 0 (0, 0)   | 14 (10, 18)    | 0.8 (0.4, 1.3) | 11.2 (7.6, 14.9)  | 0.2 (0.1, 0.3) | 3.6 (2.5, 4.7)  |
| Burundi           | Women | Ages 45 to 64     | 0.493  | 0.3 (0.1, 0.5) | 22 (18, 25) | 4 (2, 6)          | 32 (21, 43)       | 1 (0, 1)      | 37 (26, 49)        | 8 (4, 12)     | 66 (43, 88)    | 2 (1, 3)   | 7              |                |                   |                |                 |

|                          |       |                   |        |                |             |                  |                   |               |                   |              |                |             |                |                |                   |                 |                |
|--------------------------|-------|-------------------|--------|----------------|-------------|------------------|-------------------|---------------|-------------------|--------------|----------------|-------------|----------------|----------------|-------------------|-----------------|----------------|
| Canada                   | Women | Ages 45 to 64     | 4.82   | 0.6 (0.4, 0.7) | 28 (27, 29) | 24 (15, 34)      | 104 (69, 137)     | 17 (10, 24)   | 145 (104, 184)    | 5 (3, 7)     | 22 (14, 28)    | 3 (2, 5)    | 30 (22, 38)    | 1.4 (0.8, 2.0) | 11.0 (7.2, 14.5)  | 0.4 (0.3, 0.6)  | 2.2 (1.5, 2.7) |
| Canada                   | Women | Ages 65 and older | 4.96   | 0.4 (0.3, 0.5) | 28 (27, 29) | 153 (79, 246)    | 328 (239, 406)    | 38 (23, 55)   | 520 (385, 661)    | 57 (29, 92)  | 123 (90, 152)  | 14 (8, 21)  | 194 (144, 247) | 0.4 (0.2, 0.7) | 4.2 (3.0, 5.1)    | 0.3 (0.2, 0.5)  | 0.9 (0.7, 1.2) |
| Canada                   | Women | Overall           | 12     | 0.8 (0.6, 0.9) | 27 (26, 28) | 180 (98, 279)    | 454 (353, 547)    | 58 (34, 83)   | 692 (531, 858)    | 15 (8, 23)   | 38 (29, 46)    | 5 (3, 7)    | 58 (44, 72)    | 0.5 (0.3, 0.7) | 5.1 (4.0, 6.1)    | 0.4 (0.2, 0.5)  | 1.1 (0.9, 1.4) |
| Canada                   | Men   | Ages 20 to 44     | 2.26   | 1.3 (1.0, 1.7) | 27 (26, 27) | 12 (7, 17)       | 41 (29, 52)       | 2 (1, 3)      | 54 (40, 68)       | 3 (2, 4)     | 9 (6, 11)      | 0 (0, 1)    | 12 (9, 15)     | 3.1 (1.9, 4.5) | 23.4 (16.4, 29.6) | 0.6 (0.47, 1.0) | 7.7 (5.7, 9.6) |
| Canada                   | Men   | Ages 45 to 64     | 4.76   | 0.7 (0.5, 0.8) | 29 (28, 29) | 84 (50, 118)     | 205 (139, 268)    | 20 (11, 29)   | 308 (226, 392)    | 18 (11, 25)  | 43 (29, 56)    | 4 (2, 6)    | 65 (47, 82)    | 1.5 (0.9, 2.2) | 12.0 (8.1, 15.7)  | 0.5 (0.3, 0.7)  | 3.1 (2.3, 3.9) |
| Canada                   | Men   | Ages 65 and older | 4.46   | 0.5 (0.4, 0.6) | 28 (27, 28) | 161 (90, 249)    | 345 (254, 437)    | 38 (22, 54)   | 544 (413, 674)    | 75 (42, 116) | 161 (119, 205) | 18 (11, 21) | 254 (193, 316) | 0.6 (0.3, 0.9) | 5.0 (3.7, 6.3)    | 0.3 (0.2, 0.5)  | 1.3 (1.0, 1.6) |
| Canada                   | Men   | Overall           | 11.5   | 0.8 (0.6, 1.0) | 28 (27, 28) | 257 (152, 372)   | 591 (483, 709)    | 59 (36, 84)   | 907 (723, 1098)   | 22 (13, 32)  | 51 (42, 62)    | 5 (3, 7)    | 79 (63, 96)    | 0.7 (0.4, 1.1) | 6.7 (5.5, 8.1)    | 0.4 (0.2, 0.5)  | 1.7 (1.3, 2.0) |
| Canada                   | Both  | Overall           | 23.5   | 0.8 (0.6, 1.0) | 27 (27, 28) | 437 (253, 646)   | 1045 (899, 1197)  | 117 (70, 167) | 1598 (1301, 1926) | 19 (11, 28)  | 45 (38, 51)    | 5 (3, 7)    | 68 (55, 82)    | 0.6 (0.3, 0.9) | 5.9 (5.1, 6.7)    | 0.4 (0.2, 0.5)  | 1.4 (1.1, 1.7) |
| Cape Verde               | Women | Ages 20 to 44     | 0.0377 | 0.7 (0.2, 1.3) | 24 (23, 26) | 0 (0, 0)         | 0 (0, 0)          | 0 (0, 0)      | 0 (0, 0)          | 1 (1, 1)     | 5 (3, 6)       | 0 (0, 0)    | 6 (4, 7)       | 1.7 (1.2, 2.4) | 16.3 (12.2, 20.4) | 0.4 (0.2, 0.6)  | 3.7 (2.9, 4.5) |
| Cape Verde               | Women | Ages 45 to 64     | 0.0342 | 0.4 (0.1, 0.6) | 26 (25, 27) | 0 (0, 0)         | 1 (1, 1)          | 0 (0, 0)      | 1 (1, 2)          | 6 (3, 8)     | 27 (18, 36)    | 2 (1, 3)    | 34 (24, 44)    | 1.2 (0.7, 1.8) | 8.8 (6.0, 11.7)   | 0.4 (0.2, 0.6)  | 2.7 (1.9, 3.5) |
| Cape Verde               | Women | Ages 65 and older | 0.044  | 0.3 (0.1, 0.4) | 25 (22, 28) | 1 (0, 1)         | 2 (2, 3)          | 0 (0, 0)      | 3 (2, 4)          | 37 (24, 52)  | 121 (86, 155)  | 5 (3, 7)    | 163 (123, 203) | 0.4 (0.2, 0.5) | 4.2 (3.0, 5.3)    | 0.3 (0.2, 0.4)  | 1.2 (0.9, 1.4) |
| Cape Verde               | Women | Overall           | 0.116  | 0.5 (0.1, 0.8) | 25 (23, 27) | 1 (1, 1)         | 3 (3, 4)          | 0 (0, 0)      | 4 (4, 5)          | 8 (5, 11)    | 29 (23, 35)    | 2 (1, 2)    | 38 (31, 46)    | 0.5 (0.3, 0.7) | 5.2 (4.2, 6.3)    | 0.3 (0.2, 0.5)  | 1.5 (1.2, 1.8) |
| Cape Verde               | Men   | Ages 20 to 44     | 0.0414 | 0.8 (0.2, 1.4) | 23 (22, 24) | 0 (0, 0)         | 1 (1, 1)          | 0 (0, 0)      | 1 (1, 1)          | 3 (1, 4)     | 11 (8, 14)     | 0 (0, 0)    | 14 (11, 18)    | 1.2 (0.6, 1.8) | 16.7 (12.2, 21.4) | 0.2 (0.1, 0.3)  | 4.1 (3.1, 5.1) |
| Cape Verde               | Men   | Ages 45 to 64     | 0.0282 | 0.4 (0.1, 0.7) | 24 (23, 25) | 0 (0, 0)         | 1 (1, 2)          | 0 (0, 0)      | 1 (1, 2)          | 7 (3, 10)    | 45 (30, 59)    | 1 (1, 2)    | 53 (37, 68)    | 0.5 (0.3, 0.8) | 8.7 (5.9, 11.4)   | 0.3 (0.1, 0.5)  | 2.7 (1.9, 3.4) |
| Cape Verde               | Men   | Ages 65 and older | 0.0386 | 0.3 (0.1, 0.5) | 23 (21, 25) | 0 (0, 1)         | 2 (1, 2)          | 0 (0, 0)      | 2 (2, 3)          | 30 (15, 45)  | 145 (101, 189) | 5 (2, 7)    | 180 (132, 227) | 0.2 (0.1, 0.3) | 4.3 (3.0, 5.6)    | 0.2 (0.1, 0.3)  | 1.0 (0.7, 1.2) |
| Cape Verde               | Men   | Overall           | 0.108  | 0.5 (0.1, 0.9) | 23 (22, 25) | 1 (0, 1)         | 4 (3, 4)          | 0 (0, 0)      | 5 (4, 5)          | 7 (3, 10)    | 34 (27, 40)    | 1 (0, 1)    | 42 (33, 49)    | 0.3 (0.2, 0.5) | 6.4 (5.2, 7.6)    | 0.2 (0.1, 0.3)  | 1.5 (1.2, 1.8) |
| Cape Verde               | Both  | Overall           | 0.224  | 0.5 (0.1, 0.8) | 24 (23, 26) | 2 (1, 2)         | 7 (6, 8)          | 0 (0, 0)      | 9 (8, 10)         | 7 (5, 10)    | 31 (27, 36)    | 1 (1, 2)    | 40 (34, 46)    | 0.4 (0.3, 0.6) | 5.8 (5.0, 6.6)    | 0.3 (0.2, 0.4)  | 1.5 (1.3, 1.7) |
| Central African Republic | Women | Ages 20 to 44     | 0.332  | 0.3 (0.1, 0.5) | 22 (21, 24) | 0 (0, 1)         | 5 (3, 6)          | 0 (0, 0)      | 5 (4, 6)          | 1 (0, 1)     | 9 (6, 11)      | 0 (0, 0)    | 9 (7, 12)      | 0.6 (0.3, 0.9) | 9.2 (6.6, 12.0)   | 0.1 (0.1, 0.2)  | 4.2 (3.0, 5.4) |
| Central African Republic | Women | Ages 45 to 64     | 0.254  | 0.1 (0.0, 0.2) | 23 (20, 26) | 1 (1, 2)         | 10 (7, 14)        | 0 (0, 0)      | 11 (8, 15)        | 4 (2, 7)     | 39 (26, 54)    | 1 (0, 1)    | 44 (31, 60)    | 0.3 (0.2, 0.5) | 5.1 (3.3, 6.9)    | 0.1 (0.1, 0.2)  | 1.9 (1.3, 2.6) |
| Central African Republic | Women | Ages 65 and older | 0.295  | 0.1 (0.0, 0.2) | 21 (17, 26) | 2 (1, 4)         | 14 (9, 19)        | 0 (0, 0)      | 16 (11, 22)       | 24 (12, 37)  | 140 (89, 197)  | 2 (1, 3)    | 166 (110, 226) | 0.2 (0.1, 0.2) | 3.0 (1.9, 4.3)    | 0.1 (0.1, 0.2)  | 0.8 (0.5, 1.0) |
| Central African Republic | Women | Overall           | 0.881  | 0.2 (0.0, 0.3) | 22 (19, 25) | 4 (2, 6)         | 28 (22, 35)       | 0 (0, 0)      | 32 (25, 40)       | 4 (2, 6)     | 37 (29, 45)    | 2 (1, 3)    | 37 (29, 45)    | 0.2 (0.1, 0.3) | 4.0 (3.2, 5.0)    | 0.1 (0.1, 0.2)  | 1.1 (0.9, 1.4) |
| Central African Republic | Men   | Ages 20 to 44     | 0.329  | 0.3 (0.1, 0.5) | 21 (18, 24) | 0 (0, 1)         | 4 (2, 6)          | 0 (0, 0)      | 4 (2, 6)          | 1 (0, 1)     | 7 (3, 10)      | 0 (0, 0)    | 8 (4, 11)      | 0.3 (0.2, 0.5) | 4.6 (2.3, 6.8)    | 0.1 (0.1, 0.2)  | 2.0 (1.1, 2.9) |
| Central African Republic | Men   | Ages 45 to 64     | 0.222  | 0.1 (0.0, 0.2) | 21 (18, 24) | 2 (1, 4)         | 16 (10, 21)       | 0 (0, 0)      | 18 (13, 24)       | 11 (6, 17)   | 70 (47, 93)    | 1 (1, 2)    | 82 (58, 106)   | 0.3 (0.2, 0.5) | 5.4 (3.6, 7.1)    | 0.2 (0.1, 0.3)  | 1.7 (1.2, 2.2) |
| Central African Republic | Men   | Ages 65 and older | 0.282  | 0.1 (0.0, 0.2) | 21 (17, 24) | 0 (0, 0)         | 0 (0, 0)          | 0 (0, 0)      | 0 (0, 0)          | 0 (0, 0)     | 0 (0, 0)       | 0 (0, 0)    | 0 (0, 0)       | 0.0 (0.0, 0.0) | 0.0 (0.0, 0.0)    | 0.0 (0.0, 0.0)  | 0.0 (0.0, 0.0) |
| Central African Republic | Men   | Overall           | 0.833  | 0.2 (0.1, 0.3) | 21 (18, 24) | 3 (2, 4)         | 19 (14, 25)       | 0 (0, 0)      | 23 (17, 29)       | 3 (2, 5)     | 23 (17, 30)    | 0 (0, 0)    | 27 (20, 34)    | 0.1 (0.1, 0.2) | 2.7 (1.9, 3.4)    | 0.1 (0.1, 0.2)  | 0.7 (0.6, 0.9) |
| Central African Republic | Both  | Overall           | 1.71   | 0.2 (0.0, 0.3) | 22 (18, 25) | 7 (3, 10)        | 48 (39, 57)       | 1 (0, 1)      | 55 (45, 65)       | 4 (2, 6)     | 28 (23, 33)    | 0 (0, 1)    | 32 (26, 38)    | 0.2 (0.1, 0.2) | 3.3 (2.7, 4.0)    | 0.1 (0.1, 0.2)  | 0.9 (0.8, 1.1) |
| Chad                     | Women | Ages 20 to 44     | 0.763  | 0.4 (0.1, 0.7) | 22 (21, 23) | 1 (1, 2)         | 13 (9, 16)        | 0 (0, 0)      | 14 (10, 18)       | 1 (0, 1)     | 10 (7, 13)     | 0 (0, 0)    | 11 (8, 14)     | 0.7 (0.4, 1.1) | 11.0 (7.9, 14.1)  | 0.2 (0.1, 0.2)  | 5.1 (3.8, 6.5) |
| Chad                     | Women | Ages 45 to 64     | 0.57   | 0.2 (0.1, 0.3) | 23 (21, 24) | 2 (1, 4)         | 23 (16, 31)       | 0 (0, 0)      | 26 (18, 33)       | 4 (2, 6)     | 40 (27, 54)    | 0 (0, 1)    | 45 (31, 59)    | 0.4 (0.2, 0.6) | 6.1 (4.1, 8.1)    | 0.2 (0.1, 0.2)  | 2.5 (1.7, 3.2) |
| Chad                     | Women | Ages 65 and older | 0.665  | 0.1 (0.0, 0.2) | 22 (18, 25) | 3 (1, 4)         | 24 (15, 34)       | 0 (0, 0)      | 28 (17, 38)       | 16 (8, 25)   | 136 (83, 191)  | 1 (0, 1)    | 154 (97, 212)  | 0.2 (0.1, 0.2) | 3.4 (2.1, 4.8)    | 0.2 (0.1, 0.2)  | 1.2 (0.8, 1.7) |
| Chad                     | Women | Overall           | 2      | 0.3 (0.1, 0.4) | 22 (20, 24) | 6 (3, 9)         | 60 (48, 73)       | 0 (0, 1)      | 67 (53, 80)       | 3 (2, 5)     | 30 (24, 37)    | 0 (0, 0)    | 33 (26, 40)    | 0.3 (0.1, 0.4) | 5.0 (3.9, 6.0)    | 0.2 (0.1, 0.2)  | 1.9 (1.5, 2.4) |
| Chad                     | Men   | Ages 20 to 44     | 0.765  | 0.4 (0.1, 0.7) | 21 (19, 22) | 1 (0, 1)         | 5 (3, 8)          | 0 (0, 0)      | 6 (3, 8)          | 1 (0, 1)     | 4 (2, 6)       | 0 (0, 0)    | 5 (3, 7)       | 0.3 (0.2, 0.5) | 4.7 (2.5, 6.8)    | 0.1 (0.0, 0.1)  | 2.0 (1.1, 2.8) |
| Chad                     | Men   | Ages 45 to 64     | 0.52   | 0.2 (0.1, 0.4) | 22 (21, 24) | 3 (1, 4)         | 27 (18, 37)       | 0 (0, 0)      | 29 (20, 39)       | 5 (3, 8)     | 51 (34, 71)    | 0 (0, 1)    | 56 (39, 76)    | 0.4 (0.2, 0.6) | 6.1 (4.1, 8.5)    | 0.2 (0.1, 0.3)  | 2.7 (1.9, 3.6) |
| Chad                     | Men   | Ages 65 and older | 0.626  | 0.2 (0.0, 0.3) | 23 (20, 25) | 2 (1, 4)         | 22 (14, 29)       | 0 (0, 0)      | 25 (16, 32)       | 16 (9, 25)   | 153 (99, 204)  | 1 (1, 2)    | 170 (114, 224) | 0.2 (0.1, 0.3) | 3.9 (2.5, 5.2)    | 0.1 (0.1, 0.2)  | 1.5 (1.0, 2.0) |
| Chad                     | Men   | Overall           | 1.91   | 0.3 (0.1, 0.5) | 22 (20, 24) | 6 (3, 8)         | 54 (41, 66)       | 0 (0, 1)      | 60 (46, 73)       | 3 (2, 4)     | 28 (21, 35)    | 0 (0, 0)    | 31 (24, 38)    | 0.3 (0.1, 0.4) | 4.8 (3.7, 5.9)    | 0.2 (0.1, 0.2)  | 2.0 (1.5, 2.4) |
| Chad                     | Both  | Overall           | 3.91   | 0.3 (0.1, 0.4) | 22 (20, 24) | 12 (6, 18)       | 114 (97, 132)     | 1 (0, 1)      | 127 (108, 147)    | 3 (2, 5)     | 29 (25, 34)    | 0 (0, 0)    | 32 (28, 38)    | 0.3 (0.1, 0.4) | 4.9 (4.1, 5.7)    | 0.2 (0.1, 0.2)  | 1.9 (1.6, 2.2) |
| Chile                    | Women | Ages 20 to 44     | 1.19   | 0.8 (0.3, 1.3) | 27 (26, 28) | 2 (1, 2)         | 6 (5, 8)          | 2 (1, 3)      | 10 (7, 13)        | 1 (0, 1)     | 3 (2, 3)       | 1 (0, 1)    | 4 (3, 5)       | 2.3 (1.4, 3.3) | 16.8 (12.0, 21.5) | 0.8 (0.4, 1.5)  | 2.8 (2.1, 3.5) |
| Chile                    | Women | Ages 45 to 64     | 1.91   | 0.4 (0.1, 0.7) | 30 (28, 31) | 8 (5, 11)        | 37 (25, 50)       | 10 (5, 16)    | 55 (40, 73)       | 4 (2, 6)     | 20 (13, 26)    | 5 (3, 9)    | 29 (21, 38)    | 1.2 (0.7, 1.7) | 8.6 (5.7, 11.5)   | 0.7 (0.3, 1.2)  | 2.1 (1.5, 2.8) |
| Chile                    | Women | Ages 65 and older | 2.11   | 0.3 (0.1, 0.5) | 28 (26, 29) | 35 (20, 52)      | 93 (69, 116)      | 19 (10, 30)   | 147 (108, 184)    | 39 (22, 58)  | 103 (77, 129)  | 22 (12, 34) | 164 (121, 206) | 0.4 (0.2, 0.6) | 3.9 (2.9, 4.9)    | 0.6 (0.3, 0.9)  | 1.0 (0.8, 1.3) |
| Chile                    | Women | Overall           | 5.21   | 0.5 (0.2, 0.8) | 28 (26, 29) | 44 (26, 65)      | 136 (108, 163)    | 31 (17, 46)   | 212 (162, 260)    | 9 (5, 12)    | 26 (21, 31)    | 6 (3, 9)    | 41 (31, 50)    | 0.5 (0.3, 0.7) | 4.8 (3.8, 5.7)    | 0.6 (0.4, 1.0)  | 1.2 (1.0, 1.5) |
| Chile                    | Men   | Ages 20 to 44     | 1.2    | 0.8 (0.3, 1.4) | 26 (25, 27) | 6 (4, 8)         | 9 (6, 12)         | 1 (0, 1)      | 15 (11, 19)       | 2 (1, 4)     | 4 (3, 5)       | 0 (0, 0)    | 6 (5, 8)       | 2.3 (1.4, 3.3) | 17.1 (11.8, 22.1) | 0.4 (0.2, 0.6)  | 3.7 (2.7, 4.7) |
| Chile                    | Men   | Ages 45 to 64     | 1.79   | 0.4 (0.1, 0.7) | 28 (27, 30) | 22 (13, 30)      | 54 (36, 72)       | 4 (2, 6)      | 79 (57, 102)      | 12 (7, 17)   | 30 (20, 40)    | 2 (1, 3)    | 44 (32, 57)    | 1.2 (0.7, 1.7) | 8.9 (5.9, 11.9)   | 0.4 (0.2, 0.6)  | 2.4 (1.7, 3.1) |
| Chile                    | Men   | Ages 65 and older | 1.87   | 0.3 (0.1, 0.5) | 28 (26, 29) | 40 (23, 58)      | 102 (75, 129)     | 11 (6, 15)    | 152 (115, 190)    | 58 (34, 84)  | 149 (110, 187) | 15 (9, 23)  | 222 (168, 278) | 0.5 (0.3, 0.8) | 4.5 (3.3, 5.7)    | 0.4 (0.2, 0.6)  | 1.3 (1.0, 1.6) |
| Chile                    | Men   | Overall           | 4.86   | 0.5 (0.2, 0.9) | 27 (26, 28) | 67 (40, 96)      | 164 (132, 199)    | 15 (9, 22)    | 247 (194, 300)    | 14 (8, 20)   | 34 (27, 41)    | 3 (2, 5)    | 51 (40, 62)    | 0.7 (0.4, 1.0) | 5.6 (4.5, 6.8)    | 0.4 (0.2, 0.6)  | 1.6 (1.2, 1.9) |
| Chile                    | Both  | Overall           | 10.1   | 0.5 (0.2, 0.9) | 28 (26, 29) | 112 (67, 157)    | 301 (250, 346)    | 46 (26, 66)   | 459 (365, 549)    | 11 (7, 16)   | 30 (25, 34)    | 5 (3, 7)    | 46 (36, 54)    | 0.6 (0.4, 0.9) | 5.2 (4.3, 6.0)    | 0.6 (0.3, 0.8)  | 1.4 (1.1, 1.7) |
| China                    | Women | Ages 20 to 44     | 93.8   | 0.1 (0.1, 0.1) | 22 (22, 23) | 43 (22, 68)      | 339 (224, 458)    | 17 (9, 27)    | 399 (277, 530)    | 0 (0, 0)     | 2 (1, 2)       | 0 (0, 0)    | 2 (1, 3)       | 0.4 (0.2, 0.6) | 6.5 (4.3, 8.7)    | 0.1 (0.0, 0.2)  | 1.1 (0.8, 1.5) |
| China                    | Women | Ages 45 to 64     | 151    | 0.0 (0.0, 0.1) | 24 (23, 25) | 230 (116, 357)   | 1876 (1215, 2537) | 95 (48, 148)  | 2201 (1523, 2899) | 2 (1, 2)     | 12 (8, 17)     | 1 (0, 1)    | 15 (10, 19)    | 0.3 (0.1, 0.4) | 4.4 (2.8, 5.9)    | 0.1 (0.1, 0.2)  | 1.1 (0.7, 1.4) |
| China                    | Women | Ages 65 and older | 176    | 0.0 (0.0, 0.0) | 23 (22, 24) | 800 (385, 1290)  | 3001 (2108, 3899) | 149 (76, 230) | 3949 (2879, 4989) | 14 (7, 22)   | 52 (37, 68)    | 3 (1, 4)    | 68 (50, 86)    | 0.1 (0.1, 0.2) | 2.5 (1.7, 3.2)    | 0.1 (0.1, 0.2)  | 0.4 (0.3, 0.5) |
| China                    | Women | Overall           | 421    | 0.1 (0.0, 0.1) | 23 (22, 24) | 1073 (526, 1676) | 5215 (4084, 6337) | 62 (32, 95)   | 6549 (5145, 7939) | 3 (1, 4)     | 12 (10, 15)    | 1 (0, 1)    | 16 (12, 19)    | 0.1 (0.1, 0.2) | 3.1 (2.4, 3.7)    | 0.1 (0.1, 0.2)  | 0.6 (0.4, 0.7) |
| China                    | Men   | Ages 20 to 44     | 99     | 0.1 (0.1, 0.1) | 23 (22, 23) | 122 (61, 188)    | 543 (359, 731)    | 21 (10, 32)   | 686 (488, 894)    | 1 (0, 1)     | 2 (2, 3)       | 0 (0, 0)    | 3 (2, 4)       | 0.4 (0.2, 0.6) | 6.6 (4.4, 8.9)    | 0.1 (0.1, 0.2)  | 1.3 (0.9, 1.7) |
| China                    | Men   | Ages 45 to 64     | 160    | 0.0 (0.0, 0.1) | 23 (23, 24) | 533 (274, 797)   | 1972 (1351, 2666) | 03 (102, 322) | 2708 (1988, 3525) | 3 (2, 5)     | 13 (8, 17)     | 1 (1, 2)    | 17 (12, 22)    | 0.3 (0.1, 0.4) | 4.4 (3.0, 6.0)    | 0.2 (0.1, 0.3)  | 0.8 (0.6, 1.0) |
| China                    | Men   | Ages 65 and older | 176    | 0.0 (0.0, 0.0) | 23 (22, 23) | 996 (512, 1538)  | 2494 (1706, 3264) | 69 (35, 404)  | 3759 (2686, 4818) | 19 (10, 29)  | 48 (33, 63)    | 5 (3, 8)    | 72 (52, 92)    | 0.1 (0.1, 0.2) | 2.6 (1.8, 3.4)    | 0.2 (0.1, 0.2)  | 0.4 (0.3, 0.5) |
| China                    | Men   | Overall           | 434    | 0              |             |                  |                   |               |                   |              |                |             |                |                |                   |                 |                |

|               |       |                   |        |                |             |                |                |              |                   |                |                |             |                |                 |                   |                |                   |
|---------------|-------|-------------------|--------|----------------|-------------|----------------|----------------|--------------|-------------------|----------------|----------------|-------------|----------------|-----------------|-------------------|----------------|-------------------|
| Congo         | Women | Ages 20 to 44     | 0.308  | 1.5 (0.5, 2.5) | 23 (22, 24) | 2 (1, 3)       | 17 (13, 22)    | 0 (0, 0)     | 19 (14, 24)       | 3 (2, 5)       | 34 (25, 42)    | 0 (0, 1)    | 37 (28, 47)    | 1.9 (0.9, 3.0)  | 24.7 (18.2, 31.0) | 0.4 (0.2, 0.7) | 10.1 (7.6, 12.6)  |
| Congo         | Women | Ages 45 to 64     | 0.219  | 0.7 (0.2, 1.2) | 24 (22, 26) | 3 (1, 4)       | 27 (18, 36)    | 0 (0, 1)     | 30 (20, 39)       | 13 (7, 20)     | 123 (81, 163)  | 2 (1, 3)    | 138 (93, 179)  | 0.8 (0.4, 1.2)  | 11.7 (7.7, 15.5)  | 0.3 (0.3, 0.5) | 4.6 (3.1, 6.0)    |
| Congo         | Women | Ages 65 and older | 0.289  | 0.5 (0.2, 0.9) | 22 (19, 26) | 5 (3, 8)       | 26 (17, 35)    | 0 (0, 1)     | 32 (22, 42)       | 61 (31, 94)    | 329 (213, 441) | 4 (2, 7)    | 395 (271, 520) | 0.4 (0.2, 0.6)  | 6.6 (4.3, 8.8)    | 0.3 (0.2, 0.5) | 1.7 (1.2, 2.3)    |
| Congo         | Women | Overall           | 0.816  | 0.9 (0.3, 1.6) | 23 (21, 25) | 10 (5, 14)     | 71 (58, 84)    | 1 (0, 1)     | 81 (66, 96)       | 12 (6, 18)     | 87 (71, 103)   | 1 (1, 2)    | 99 (80, 118)   | 0.5 (0.3, 0.8)  | 10.1 (8.2, 12.0)  | 0.3 (0.2, 0.5) | 3.0 (2.5, 3.6)    |
| Congo         | Men   | Ages 20 to 44     | 0.31   | 1.6 (0.5, 2.8) | 21 (20, 23) | 3 (1, 4)       | 19 (13, 24)    | 0 (0, 0)     | 22 (16, 27)       | 5 (3, 8)       | 37 (25, 47)    | 0 (0, 0)    | 42 (30, 52)    | 1.6 (0.8, 2.5)  | 23.0 (15.6, 29.3) | 0.5 (0.2, 0.8) | 9.1 (6.5, 11.4)   |
| Congo         | Men   | Ages 45 to 64     | 0.21   | 0.8 (0.2, 1.4) | 23 (21, 25) | 5 (3, 8)       | 32 (22, 43)    | 0 (0, 1)     | 38 (27, 49)       | 25 (12, 37)    | 153 (103, 204) | 2 (1, 3)    | 180 (127, 233) | 0.8 (0.4, 1.2)  | 12.8 (8.6, 16.9)  | 0.5 (0.2, 0.8) | 4.1 (2.9, 5.3)    |
| Congo         | Men   | Ages 65 and older | 0.282  | 0.6 (0.2, 1.0) | 22 (19, 25) | 4 (2, 7)       | 22 (14, 29)    | 0 (0, 1)     | 27 (19, 35)       | 66 (33, 100)   | 320 (213, 432) | 6 (3, 9)    | 392 (276, 514) | 0.4 (0.2, 0.6)  | 7.0 (4.6, 9.4)    | 0.4 (0.2, 0.6) | 1.7 (1.2, 2.3)    |
| Congo         | Men   | Overall           | 0.803  | 1.0 (0.3, 1.8) | 22 (20, 24) | 12 (6, 19)     | 73 (58, 88)    | 1 (1, 2)     | 86 (69, 103)      | 15 (8, 23)     | 91 (72, 110)   | 1 (1, 2)    | 108 (86, 129)  | 0.6 (0.3, 1.0)  | 11.3 (9.0, 13.7)  | 0.4 (0.2, 0.7) | 3.2 (2.6, 3.8)    |
| Congo         | Both  | Overall           | 1.62   | 1.0 (0.3, 1.7) | 22 (20, 24) | 22 (11, 33)    | 144 (124, 164) | 2 (1, 3)     | 168 (142, 194)    | 13 (7, 20)     | 89 (77, 101)   | 1 (1, 2)    | 104 (88, 120)  | 0.6 (0.3, 0.9)  | 10.7 (9.2, 12.2)  | 0.4 (0.2, 0.6) | 3.1 (2.6, 3.6)    |
| Costa Rica    | Women | Ages 20 to 44     | 0.382  | 2.7 (0.8, 4.6) | 26 (24, 27) | 2 (1, 2)       | 5 (4, 6)       | 1 (0, 1)     | 7 (5, 8)          | 2 (1, 3)       | 7 (5, 8)       | 1 (1, 1)    | 10 (8, 12)     | 6.4 (3.8, 9.4)  | 39.3 (31.0, 46.7) | 1.3 (0.8, 2.0) | 7.8 (6.0, 9.4)    |
| Costa Rica    | Women | Ages 45 to 64     | 0.444  | 1.4 (0.5, 2.4) | 29 (28, 31) | 6 (4, 9)       | 21 (15, 27)    | 3 (1, 4)     | 30 (23, 38)       | 14 (8, 20)     | 44 (34, 60)    | 6 (3, 9)    | 68 (51, 85)    | 3.1 (1.8, 4.4)  | 21.2 (15.1, 26.6) | 1.0 (0.6, 1.6) | 5.4 (4.1, 6.8)    |
| Costa Rica    | Women | Ages 65 and older | 0.475  | 1.0 (0.3, 1.7) | 27 (26, 28) | 19 (10, 28)    | 36 (27, 45)    | 4 (2, 5)     | 58 (43, 73)       | 114 (64, 172)  | 220 (168, 274) | 22 (13, 33) | 356 (261, 446) | 1.1 (0.6, 1.7)  | 8.2 (6.2, 10.2)   | 0.8 (0.5, 1.2) | 2.3 (1.7, 2.9)    |
| Costa Rica    | Women | Overall           | 1.3    | 1.8 (0.5, 3.0) | 27 (26, 28) | 26 (15, 38)    | 62 (51, 73)    | 7 (4, 10)    | 95 (74, 116)      | 20 (12, 29)    | 48 (39, 56)    | 5 (3, 8)    | 73 (57, 89)    | 1.4 (0.8, 2.0)  | 11.2 (9.3, 13.2)  | 0.9 (0.5, 1.3) | 3.0 (2.3, 3.6)    |
| Costa Rica    | Men   | Ages 20 to 44     | 0.4    | 3.0 (0.8, 5.1) | 26 (25, 27) | 4 (2, 6)       | 8 (6, 9)       | 0 (0, 1)     | 10 (10, 15)       | 6 (3, 8)       | 11 (8, 13)     | 1 (0, 1)    | 17 (13, 21)    | 6.8 (4.1, 9.9)  | 41.7 (32.0, 49.4) | 0.7 (0.4, 1.2) | 12.0 (9.4, 14.7)  |
| Costa Rica    | Men   | Ages 45 to 64     | 0.453  | 1.6 (0.5, 2.7) | 27 (26, 29) | 16 (10, 22)    | 25 (18, 32)    | 2 (1, 3)     | 43 (33, 54)       | 35 (21, 49)    | 55 (40, 70)    | 4 (2, 6)    | 94 (72, 118)   | 3.3 (2.0, 4.7)  | 23.2 (16.9, 29.3) | 0.8 (0.4, 1.2) | 5.8 (4.5, 7.4)    |
| Costa Rica    | Men   | Ages 65 and older | 0.463  | 1.1 (0.3, 1.9) | 26 (25, 27) | 18 (12, 25)    | 27 (20, 33)    | 2 (1, 3)     | 47 (37, 59)       | 129 (85, 176)  | 189 (139, 235) | 16 (11, 23) | 334 (259, 415) | 1.0 (0.7, 1.4)  | 9.6 (7.0, 11.9)   | 0.5 (0.3, 0.7) | 2.0 (1.5, 2.4)    |
| Costa Rica    | Men   | Overall           | 1.32   | 1.9 (0.5, 3.3) | 26 (25, 27) | 38 (24, 52)    | 60 (50, 70)    | 5 (3, 6)     | 102 (82, 124)     | 29 (18, 40)    | 45 (38, 53)    | 3 (2, 5)    | 78 (62, 94)    | 1.6 (1.0, 2.3)  | 14.7 (12.3, 17.1) | 0.6 (0.4, 0.9) | 3.2 (2.5, 3.8)    |
| Costa Rica    | Both  | Overall           | 2.62   | 1.8 (0.5, 3.1) | 27 (25, 28) | 64 (40, 90)    | 121 (106, 137) | 11 (7, 16)   | 197 (158, 236)    | 25 (15, 35)    | 46 (41, 52)    | 4 (3, 6)    | 75 (60, 90)    | 1.5 (1.0, 2.2)  | 12.7 (11.1, 14.3) | 0.8 (0.5, 1.1) | 3.1 (2.5, 3.7)    |
| Côte d'Ivoire | Women | Ages 20 to 44     | 1.43   | 0.5 (0.1, 0.9) | 24 (22, 25) | 3 (1, 4)       | 39 (29, 50)    | 0 (0, 0)     | 42 (31, 53)       | 1 (1, 2)       | 17 (13, 22)    | 0 (0, 0)    | 19 (14, 23)    | 0.9 (0.4, 1.3)  | 12.6 (9.2, 16.1)  | 0.2 (0.1, 0.3) | 6.6 (4.9, 8.3)    |
| Côte d'Ivoire | Women | Ages 45 to 64     | 1.04   | 0.2 (0.1, 0.4) | 24 (23, 26) | 5 (3, 8)       | 60 (41, 79)    | 1 (0, 1)     | 66 (47, 86)       | 5 (3, 8)       | 58 (39, 76)    | 1 (0, 1)    | 63 (45, 82)    | 0.4 (0.2, 0.7)  | 6.6 (4.5, 8.8)    | 0.1 (0.1, 0.2) | 2.9 (2.0, 3.7)    |
| Côte d'Ivoire | Women | Ages 65 and older | 1.19   | 0.2 (0.1, 0.3) | 23 (21, 26) | 8 (4, 12)      | 72 (49, 96)    | 1 (0, 1)     | 80 (56, 105)      | 23 (12, 34)    | 207 (140, 277) | 2 (1, 3)    | 232 (162, 304) | 0.2 (0.1, 0.3)  | 3.8 (2.6, 5.2)    | 0.1 (0.1, 0.2) | 1.5 (1.0, 1.9)    |
| Côte d'Ivoire | Women | Overall           | 3.65   | 0.3 (0.1, 0.5) | 24 (22, 25) | 16 (8, 24)     | 170 (136, 201) | 1 (1, 2)     | 188 (151, 221)    | 4 (2, 7)       | 47 (37, 55)    | 0 (0, 1)    | 51 (41, 60)    | 0.3 (0.2, 0.5)  | 5.5 (4.4, 6.5)    | 0.2 (0.1, 0.2) | 2.2 (1.8, 2.6)    |
| Côte d'Ivoire | Men   | Ages 20 to 44     | 1.45   | 0.5 (0.2, 0.9) | 22 (21, 24) | 6 (3, 9)       | 45 (33, 58)    | 0 (0, 0)     | 51 (38, 65)       | 2 (1, 4)       | 19 (14, 24)    | 0 (0, 0)    | 21 (16, 27)    | 0.8 (0.4, 1.3)  | 13.0 (9.3, 16.6)  | 0.1 (0.1, 0.2) | 5.2 (3.8, 6.6)    |
| Côte d'Ivoire | Men   | Ages 45 to 64     | 1.2    | 0.3 (0.1, 0.4) | 23 (21, 25) | 11 (5, 16)     | 112 (76, 149)  | 0 (0, 1)     | 123 (87, 161)     | 9 (5, 13)      | 94 (64, 125)   | 0 (0, 0)    | 103 (73, 135)  | 0.4 (0.2, 0.6)  | 6.7 (4.5, 8.9)    | 0.2 (0.1, 0.3) | 3.1 (2.2, 4.1)    |
| Côte d'Ivoire | Men   | Ages 65 and older | 1.35   | 0.2 (0.1, 0.3) | 22 (20, 24) | 10 (5, 15)     | 97 (60, 134)   | 0 (0, 0)     | 107 (71, 144)     | 25 (13, 38)    | 241 (149, 333) | 1 (0, 1)    | 267 (176, 359) | 0.2 (0.1, 0.3)  | 4.1 (2.6, 5.7)    | 0.1 (0.1, 0.2) | 1.7 (1.1, 2.2)    |
| Côte d'Ivoire | Men   | Overall           | 4      | 0.3 (0.1, 0.6) | 22 (21, 24) | 26 (13, 40)    | 254 (201, 307) | 1 (0, 1)     | 282 (225, 342)    | 7 (3, 10)      | 64 (50, 77)    | 0 (0, 0)    | 70 (56, 85)    | 0.3 (0.2, 0.5)  | 5.8 (4.6, 7.0)    | 0.1 (0.1, 0.2) | 2.5 (2.0, 3.0)    |
| Côte d'Ivoire | Both  | Overall           | 7.65   | 0.3 (0.1, 0.6) | 23 (21, 25) | 42 (22, 64)    | 425 (361, 487) | 2 (1, 3)     | 469 (399, 541)    | 6 (3, 8)       | 56 (47, 64)    | 0 (0, 0)    | 61 (52, 71)    | 0.3 (0.2, 0.5)  | 5.7 (4.9, 6.5)    | 0.1 (0.1, 0.2) | 2.4 (2.0, 2.7)    |
| Croatia       | Women | Ages 20 to 44     | 0.305  | 0.5 (0.4, 0.6) | 23 (21, 25) | 0 (0, 0)       | 1 (0, 1)       | 0 (0, 0)     | 1 (1, 1)          | 0 (0, 1)       | 1 (1, 1)       | 0 (0, 0)    | 2 (1, 2)       | 1.4 (0.8, 2.0)  | 11.7 (7.9, 15.5)  | 0.3 (0.2, 0.5) | 1.2 (0.9, 1.5)    |
| Croatia       | Women | Ages 45 to 64     | 0.631  | 0.2 (0.2, 0.3) | 28 (25, 30) | 4 (2, 6)       | 6 (4, 8)       | 2 (0, 2)     | 11 (8, 15)        | 6 (4, 9)       | 10 (6, 13)     | 2 (1, 4)    | 18 (13, 23)    | 0.9 (0.6, 1.3)  | 6.9 (4.6, 9.2)    | 0.3 (0.2, 0.4) | 1.0 (0.7, 1.3)    |
| Croatia       | Women | Ages 65 and older | 0.765  | 0.2 (0.1, 0.2) | 28 (25, 30) | 43 (23, 66)    | 37 (28, 46)    | 5 (3, 7)     | 85 (60, 113)      | 92 (50, 142)   | 79 (60, 99)    | 11 (6, 16)  | 182 (128, 243) | 0.4 (0.2, 0.5)  | 3.2 (2.4, 3.9)    | 0.2 (0.1, 0.4) | 0.5 (0.4, 0.7)    |
| Croatia       | Women | Overall           | 1.7    | 0.3 (0.2, 0.4) | 26 (24, 28) | 47 (26, 72)    | 44 (35, 53)    | 7 (4, 10)    | 97 (69, 128)      | 28 (15, 42)    | 26 (20, 31)    | 4 (2, 6)    | 57 (41, 75)    | 0.4 (0.2, 0.6)  | 3.5 (2.8, 4.2)    | 0.2 (0.1, 0.4) | 0.6 (0.4, 0.7)    |
| Croatia       | Men   | Ages 20 to 44     | 0.315  | 0.6 (0.5, 0.7) | 26 (24, 28) | 2 (1, 2)       | 2 (1, 2)       | 0 (0, 0)     | 3 (2, 4)          | 3 (2, 4)       | 3 (2, 3)       | 0 (0, 0)    | 6 (4, 7)       | 1.7 (1.0, 2.4)  | 13.9 (9.5, 18.1)  | 0.3 (0.2, 0.5) | 2.3 (1.6, 2.9)    |
| Croatia       | Men   | Ages 45 to 64     | 0.603  | 0.3 (0.2, 0.3) | 28 (26, 30) | 13 (8, 19)     | 12 (8, 16)     | 2 (1, 3)     | 28 (20, 36)       | 22 (13, 31)    | 21 (14, 27)    | 4 (2, 6)    | 46 (33, 60)    | 1.0 (0.6, 1.4)  | 7.4 (5.1, 9.7)    | 0.3 (0.2, 0.4) | 1.3 (0.9, 1.7)    |
| Croatia       | Men   | Ages 65 and older | 0.591  | 0.2 (0.2, 0.2) | 27 (25, 29) | 32 (19, 46)    | 27 (19, 35)    | 4 (3, 6)     | 63 (45, 82)       | 109 (65, 157)  | 93 (65, 120)   | 15 (9, 22)  | 218 (154, 280) | 0.4 (0.3, 0.6)  | 3.9 (2.7, 5.0)    | 0.1 (0.1, 0.2) | 0.7 (0.5, 0.8)    |
| Croatia       | Men   | Overall           | 1.51   | 0.4 (0.3, 0.5) | 27 (25, 28) | 46 (28, 66)    | 41 (32, 51)    | 7 (4, 10)    | 95 (69, 121)      | 31 (18, 44)    | 27 (21, 34)    | 5 (3, 6)    | 63 (46, 80)    | 0.5 (0.3, 0.8)  | 4.7 (3.6, 5.7)    | 0.2 (0.1, 0.3) | 0.8 (0.6, 1.0)    |
| Croatia       | Both  | Overall           | 3.21   | 0.3 (0.3, 0.4) | 26 (24, 28) | 94 (56, 136)   | 85 (72, 99)    | 14 (8, 19)   | 192 (143, 243)    | 29 (17, 42)    | 26 (22, 31)    | 4 (3, 6)    | 60 (45, 76)    | 0.4 (0.3, 0.6)  | 4.0 (3.3, 4.6)    | 0.2 (0.1, 0.3) | 0.7 (0.5, 0.8)    |
| Cuba          | Women | Ages 20 to 44     | 0.68   | 4.9 (1.4, 8.4) | 25 (24, 27) | 10 (6, 14)     | 29 (23, 34)    | 4 (3, 6)     | 43 (34, 53)       | 6 (3, 8)       | 17 (13, 20)    | 3 (2, 4)    | 26 (20, 31)    | 9.9 (5.9, 14.6) | 51.5 (39.8, 59.1) | 2.4 (1.4, 3.5) | 12.3 (9.6, 15.0)  |
| Cuba          | Women | Ages 45 to 64     | 1.43   | 2.4 (0.7, 4.1) | 29 (27, 31) | 65 (40, 92)    | 148 (105, 184) | 17 (10, 24)  | 230 (176, 283)    | 46 (28, 64)    | 103 (73, 129)  | 12 (7, 17)  | 161 (123, 198) | 4.8 (2.9, 6.7)  | 30.8 (21.9, 38.4) | 1.5 (0.9, 2.3) | 7.8 (5.9, 9.5)    |
| Cuba          | Women | Ages 65 and older | 1.76   | 1.8 (0.5, 3.1) | 26 (23, 30) | 161 (107, 222) | 297 (225, 368) | 24 (16, 33)  | 482 (381, 586)    | 216 (143, 297) | 398 (302, 493) | 32 (21, 45) | 646 (510, 785) | 1.1 (0.7, 1.5)  | 13.9 (10.5, 17.2) | 0.8 (0.5, 1.1) | 2.4 (1.9, 2.9)    |
| Cuba          | Women | Overall           | 3.87   | 3.1 (0.9, 5.4) | 26 (24, 29) | 236 (151, 322) | 474 (392, 554) | 45 (29, 62)  | 755 (616, 896)    | 61 (39, 83)    | 123 (101, 143) | 12 (7, 16)  | 195 (159, 232) | 1.5 (0.9, 2.0)  | 17.7 (14.6, 20.7) | 1.0 (0.7, 1.4) | 3.2 (2.6, 3.8)    |
| Cuba          | Men   | Ages 20 to 44     | 0.714  | 5.5 (1.4, 9.6) | 25 (24, 26) | 27 (17, 37)    | 34 (28, 38)    | 3 (2, 4)     | 64 (49, 78)       | 15 (9, 21)     | 19 (16, 22)    | 2 (1, 2)    | 36 (28, 44)    | 9.7 (6.0, 13.4) | 52.9 (43.2, 59.5) | 2.3 (1.3, 3.5) | 14.9 (11.6, 18.2) |
| Cuba          | Men   | Ages 45 to 64     | 1.43   | 2.6 (0.7, 4.6) | 26 (24, 27) | 129 (77, 184)  | 123 (93, 150)  | 16 (10, 24)  | 269 (200, 340)    | 90 (54, 129)   | 86 (65, 105)   | 12 (7, 17)  | 188 (140, 238) | 5.1 (3.1, 7.3)  | 33.6 (25.4, 40.9) | 2.2 (1.3, 3.2) | 7.4 (5.5, 9.4)    |
| Cuba          | Men   | Ages 65 and older | 1.69   | 2.0 (0.5, 3.4) | 24 (22, 26) | 103 (51, 163)  | 154 (112, 192) | 12 (6, 19)   | 269 (193, 349)    | 159 (79, 252)  | 237 (173, 296) | 19 (10, 29) | 416 (298, 537) | 0.8 (0.4, 1.3)  | 15.2 (11.1, 18.9) | 0.5 (0.3, 0.8) | 1.7 (1.2, 2.2)    |
| Cuba          | Men   | Overall           | 3.84   | 3.5 (0.9, 6.0) | 25 (23, 26) | 259 (177, 345) | 311 (261, 359) | 31 (21, 42)  | 602 (483, 724)    | 68 (46, 90)    | 81 (68, 94)    | 8 (6, 11)   | 157 (126, 188) | 1.5 (1.1, 2.2)  | 15.1 (11.1, 24.9) | 1.1 (0.7, 1.4) | 3.0 (2.4, 3.6)    |
| Cuba          | Both  | Overall           | 7.7    | 3.3 (0.9, 5.7) | 26 (24, 28) | 495 (339, 663) | 785 (685, 889) | 76 (51, 103) | 1357 (1138, 1599) | 64 (44, 86)    | 102 (89, 115)  | 10 (7, 13)  | 176 (148, 208) | 1.6 (1.1, 2.1)  | 19.1 (16.6, 21.6) | 1.0 (0.7, 1.4) | 3.1 (2.6, 3.7)    |
| Cyprus        | Women | Ages 20 to 44     | 0.0603 | 0.5 (0.4, 0.7) | 23 (21, 25) | 0 (0, 0)       | 0 (0, 0)       | 0 (0, 0)     | 0 (0, 0)          | 0 (0, 0)       | 1 (1, 1)       | 0 (0, 0)    | 2 (1, 2)       | 1.4 (0.9, 2.0)  | 11.6 (7.5, 15.6)  | 0.4 (0.2, 0.5) | 1.6 (1.1, 2.0)    |
| Cyprus        | Women | Ages 45 to 64     | 0.0935 | 0.2 (0.2, 0.3) | 29 (27, 31) | 0 (0, 0)       | 1 (1, 2)       | 0 (0, 0)     | 2 (1, 2)          | 3 (2, 4)       | 12 (8, 16)     | 2 (1, 3)    | 17 (12, 22)    | 0.9 (0.5, 1.3)  | 6.8 (4.4, 9.2)    | 0.3 (0.2, 0.4) | 1.3 (0.9, 1.7)    |
| Cyprus        | Women | Ages 65 and older | 0.102  | 0.2 (0.1, 0.2) | 30 (27, 34) | 2 (1, 3)       | 10 (7, 12)     | 0 (0, 1)     | 12 (10, 15)       | 47 (26, 71)    | 214 (158, 268) | 9 (5, 13)   | 270 (208, 334) | 0.3 (0.2, 0.5)  | 2.9 (2.2, 3.7)    | 0.2 (0.1, 0.3) | 1.2 (0.9, 1.4)    |
| Cyprus        | Women | Overall           | 0.255  | 0.3 (0.3, 0.4) | 27 (25, 30) | 3 (1, 4)       | 11 (9, 14)     | 1 (0, 1)     | 14 (11, 17)       | 10 (6, 14)     | 43 (33, 53)    | 2 (1, 3)    | 55 (44, 68)    | 0.4 (0.2, 0.5)  | 3.1 (2.4, 3.8)    | 0.3 (0.2, 0.4) | 1.2 (0.9, 1.5)    |
| Cyprus        | Men   | Ages 20 to 44     | 0.0601 | 0.6 (0.5, 0.8) | 26 (25, 28) | 0 (0, 0)       | 0 (0, 0)       | 0 (0, 0)     | 1 (0, 1)          | 2 (1, 3)       | 2 (2, 3)       | 0 (0, 0)    | 5 (4, 6)       | 1.7 (1.0, 2.4)  | 13.9 (9.8, 18.1)  | 0.2 (0.1, 0.4) | 2.5 (1.9, 3.2)    |
| Cyprus        | Men   | Ages 45 to 64     | 0.0902 |                |             |                |                |              |                   |                |                |             |                |                 |                   |                |                   |



|                                       |       |                   |         |               |             |                |                |             |                |               |                |             |                 |               |                  |               |                  |
|---------------------------------------|-------|-------------------|---------|---------------|-------------|----------------|----------------|-------------|----------------|---------------|----------------|-------------|-----------------|---------------|------------------|---------------|------------------|
| Democratic People's Republic of Korea | Men   | Ages 65 and older | 2.95    | 0.0(0.0, 0.1) | 22 (18, 25) | 16 (8, 24)     | 37 (24, 51)    | 3 (2, 5)    | 56 (39, 75)    | 20 (10, 30)   | 46 (29, 63)    | 4 (2, 6)    | 69 (48, 93)     | 0.2(0.1, 0.3) | 3.0(1.9, 4.2)    | 0.1(0.1, 0.2) | 0.4(0.3, 0.6)    |
| Democratic People's Republic of Korea | Men   | Overall           | 7.09    | 0.1(0.0, 0.1) | 22 (19, 25) | 31 (16, 46)    | 81 (63, 101)   | 7 (3, 10)   | 119 (93, 148)  | 4 (2, 7)      | 11 (9, 14)     | 1 (0, 1)    | 17 (13, 21)     | 0.2(0.1, 0.3) | 3.8(3.0, 4.7)    | 0.1(0.1, 0.2) | 0.6(0.4, 0.7)    |
| Democratic People's Republic of Korea | Both  | Overall           | 14.9    | 0.1(0.0, 0.1) | 21 (18, 25) | 59 (31, 90)    | 212 (174, 250) | 12 (6, 18)  | 283 (229, 339) | 4 (2, 6)      | 14 (12, 17)    | 1 (0, 1)    | 19 (15, 23)     | 0.2(0.1, 0.2) | 3.2(2.6, 3.8)    | 0.1(0.1, 0.2) | 0.5(0.4, 0.6)    |
|                                       |       |                   |         |               |             |                |                |             |                |               |                |             |                 |               |                  | 9             |                  |
| Democratic Republic of the Congo      | Women | Ages 20 to 44     | 4.37    | 0.3(0.1, 0.4) | 22 (21, 22) | 5 (2, 8)       | 57 (38, 76)    | 1 (0, 1)    | 63 (44, 83)    | 1 (0, 1)      | 8 (5, 11)      | 0 (0, 0)    | 9 (6, 12)       | 0.5(0.2, 0.8) | 7.3(4.9, 9.7)    | 0.1(0.1, 0.2) | 3.1(2.1, 4.1)    |
| Democratic Republic of the Congo      | Women | Ages 45 to 64     | 3.1     | 0.1(0.0, 0.2) | 22 (21, 23) | 15 (7, 24)     | 136 (90, 183)  | 2 (1, 3)    | 153 (106, 202) | 5 (2, 8)      | 44 (29, 59)    | 1 (0, 1)    | 50 (34, 65)     | 0.3(0.2, 0.5) | 5.1(3.4, 6.9)    | 0.2(0.1, 0.2) | 2.0(1.4, 2.6)    |
| Democratic Republic of the Congo      | Women | Ages 65 and older | 3.83    | 0.1(0.0, 0.2) | 22 (20, 24) | 25 (13, 39)    | 134 (84, 180)  | 2 (1, 3)    | 161 (108, 211) | 26 (13, 39)   | 135 (85, 182)  | 2 (1, 3)    | 162 (109, 213)  | 0.2(0.1, 0.3) | 3.3(2.1, 4.5)    | 0.2(0.1, 0.2) | 0.9(0.6, 1.1)    |
| Democratic Republic of the Congo      | Women | Overall           | 11.3    | 0.2(0.0, 0.3) | 22 (20, 23) | 46 (23, 71)    | 327 (258, 396) | 4 (2, 6)    | 377 (298, 455) | 4 (2, 6)      | 29 (23, 35)    | 0 (0, 1)    | 33 (26, 40)     | 0.2(0.1, 0.4) | 4.4(3.5, 5.3)    | 0.2(0.1, 0.2) | 1.3(1.1, 1.6)    |
| Democratic Republic of the Congo      | Men   | Ages 20 to 44     | 4.34    | 0.3(0.1, 0.5) | 20 (18, 21) | 0 (0, 0)       | 0 (0, 0)       | 0 (0, 0)    | 0 (0, 0)       | 0 (0, 0)      | 0 (0, 0)       | 0 (0, 0)    | 0 (0, 0)        | 0.0(0.0, 0.0) | 0.0(0.0, 0.0)    | 0.0(0.0, 0.0) | 0.0(0.0, 0.0)    |
| Democratic Republic of the Congo      | Men   | Ages 45 to 64     | 2.89    | 0.1(0.0, 0.2) | 20 (18, 22) | 0 (0, 0)       | 0 (0, 0)       | 0 (0, 0)    | 0 (0, 0)       | 0 (0, 0)      | 0 (0, 0)       | 0 (0, 0)    | 0 (0, 0)        | 0.0(0.0, 0.0) | 0.0(0.0, 0.0)    | 0.0(0.0, 0.0) | 0.0(0.0, 0.0)    |
| Democratic Republic of the Congo      | Men   | Ages 65 and older | 3.57    | 0.1(0.0, 0.2) | 20 (18, 22) | 0 (0, 0)       | 0 (0, 0)       | 0 (0, 0)    | 0 (0, 0)       | 0 (0, 0)      | 0 (0, 0)       | 0 (0, 0)    | 0 (0, 0)        | 0.0(0.0, 0.0) | 0.0(0.0, 0.0)    | 0.0(0.0, 0.0) | 0.0(0.0, 0.0)    |
| Democratic Republic of the Congo      | Men   | Overall           | 10.8    | 0.2(0.1, 0.3) | 20 (18, 22) | 0 (0, 0)       | 0 (0, 0)       | 0 (0, 0)    | 0 (0, 0)       | 0 (0, 0)      | 0 (0, 0)       | 0 (0, 0)    | 0 (0, 0)        | 0.0(0.0, 0.0) | 0.0(0.0, 0.0)    | 0.0(0.0, 0.0) | 0.0(0.0, 0.0)    |
| Democratic Republic of the Congo      | Both  | Overall           | 22.1    | 0.2(0.0, 0.3) | 21 (19, 23) | 46 (23, 71)    | 327 (258, 396) | 4 (2, 6)    | 377 (298, 455) | 2 (1, 3)      | 15 (12, 18)    | 0 (0, 0)    | 17 (13, 21)     | 0.1(0.1, 0.2) | 2.5(2.0, 3.0)    | 0.1(0.0, 0.1) | 0.7(0.6, 0.9)    |
|                                       |       |                   |         |               |             |                |                |             |                |               |                |             |                 |               |                  |               |                  |
| Denmark                               | Women | Ages 20 to 44     | 0.323   | 0.5(0.1, 0.9) | 24 (22, 26) | 0 (0, 0)       | 2 (1, 2)       | 0 (0, 0)    | 2 (2, 3)       | 0 (0, 0)      | 3 (2, 3)       | 0 (0, 0)    | 3 (2, 4)        | 1.4(0.9, 2.1) | 12.1(7.9, 16.2)  | 0.3(0.2, 0.4) | 2.3(1.6, 2.9)    |
| Denmark                               | Women | Ages 45 to 64     | 0.741   | 0.2(0.1, 0.4) | 27 (24, 29) | 2 (1, 3)       | 8 (6, 11)      | 2 (1, 3)    | 13 (9, 16)     | 3 (2, 4)      | 11 (8, 15)     | 3 (2, 4)    | 17 (12, 22)     | 0.9(0.5, 1.2) | 6.9(4.7, 9.1)    | 0.3(0.1, 0.4) | 1.0(0.7, 1.3)    |
| Denmark                               | Women | Ages 65 and older | 0.903   | 0.2(0.0, 0.3) | 26 (23, 29) | 21 (11, 34)    | 31 (23, 39)    | 6 (4, 9)    | 59 (42, 77)    | 42 (22, 66)   | 61 (44, 76)    | 12 (7, 17)  | 115 (83, 151)   | 0.3(0.2, 0.5) | 2.8(2.0, 3.5)    | 0.2(0.1, 0.3) | 0.5(0.4, 0.7)    |
| Denmark                               | Women | Overall           | 1.97    | 0.3(0.1, 0.6) | 25 (23, 28) | 24 (13, 37)    | 41 (32, 49)    | 8 (5, 12)   | 73 (55, 94)    | 12 (7, 19)    | 21 (16, 25)    | 4 (3, 6)    | 37 (28, 48)     | 0.3(0.2, 0.5) | 3.3(2.6, 4.0)    | 0.2(0.1, 0.3) | 0.6(0.4, 0.7)    |
| Denmark                               | Men   | Ages 20 to 44     | 0.327   | 0.6(0.2, 1.0) | 25 (24, 27) | 1 (1, 1)       | 5 (3, 7)       | 0 (0, 0)    | 6 (4, 8)       | 1 (1, 2)      | 7 (5, 9)       | 0 (0, 0)    | 9 (6, 11)       | 1.6(1.0, 2.3) | 13.1(8.8, 17.4)  | 0.3(0.2, 0.5) | 5.3(3.7, 6.8)    |
| Denmark                               | Men   | Ages 45 to 64     | 0.747   | 0.2(0.1, 0.4) | 27 (26, 29) | 8 (5, 11)      | 23 (16, 31)    | 2 (1, 4)    | 33 (24, 43)    | 10 (6, 15)    | 31 (21, 41)    | 3 (2, 5)    | 45 (32, 57)     | 0.9(0.5, 1.3) | 7.1(4.8, 9.4)    | 0.3(0.2, 0.4) | 1.9(1.3, 2.4)    |
| Denmark                               | Men   | Ages 65 and older | 0.81    | 0.2(0.1, 0.3) | 26 (24, 29) | 21 (12, 32)    | 38 (27, 48)    | 6 (4, 9)    | 65 (48, 82)    | 52 (30, 78)   | 92 (66, 118)   | 15 (9, 21)  | 159 (117, 202)  | 0.4(0.2, 0.6) | 3.4(2.5, 4.4)    | 0.2(0.1, 0.3) | 0.7(0.6, 0.9)    |
| Denmark                               | Men   | Overall           | 1.88    | 0.4(0.1, 0.6) | 26 (25, 28) | 30 (18, 44)    | 66 (53, 79)    | 9 (5, 12)   | 104 (81, 129)  | 16 (9, 23)    | 35 (28, 42)    | 5 (3, 6)    | 55 (43, 68)     | 0.5(0.3, 0.7) | 4.5(3.6, 5.4)    | 0.2(0.1, 0.3) | 1.0(0.8, 1.2)    |
| Denmark                               | Both  | Overall           | 3.85    | 0.3(0.1, 0.6) | 26 (24, 28) | 54 (32, 77)    | 107 (91, 124)  | 17 (10, 24) | 178 (140, 217) | 14 (8, 20)    | 28 (24, 32)    | 4 (3, 6)    | 46 (36, 56)     | 0.4(0.2, 0.5) | 5.9(3.3, 4.6)    | 0.2(0.1, 0.3) | 0.8(0.6, 0.9)    |
|                                       |       |                   |         |               |             |                |                |             |                |               |                |             |                 |               |                  |               |                  |
| Djibouti                              | Women | Ages 20 to 44     | 0.07    | 0.5(0.1, 0.9) | 24 (20, 27) | 0 (0, 0)       | 1 (1, 1)       | 0 (0, 0)    | 1 (1, 1)       | 1 (0, 1)      | 9 (6, 11)      | 0 (0, 0)    | 10 (7, 12)      | 0.9(0.4, 1.4) | 12.5(9.0, 16.2)  | 0.2(0.1, 0.3) | 4.1(3.0, 5.2)    |
| Djibouti                              | Women | Ages 45 to 64     | 0.0558  | 0.3(0.1, 0.5) | 26 (22, 29) | 1 (0, 1)       | 3 (2, 4)       | 0 (0, 0)    | 4 (3, 5)       | 11 (7, 17)    | 59 (40, 77)    | 3 (2, 4)    | 73 (53, 93)     | 1.0(0.6, 1.5) | 7.2(5.0, 9.5)    | 0.4(0.2, 0.6) | 3.0(2.2, 3.8)    |
| Djibouti                              | Women | Ages 65 and older | 0.0656  | 0.2(0.1, 0.3) | 24 (19, 30) | 1 (0, 1)       | 4 (3, 5)       | 0 (0, 0)    | 5 (3, 6)       | 47 (30, 64)   | 232 (157, 309) | 6 (4, 8)    | 285 (206, 363)  | 0.4(0.3, 0.6) | 4.1(2.8, 5.4)    | 0.4(0.2, 0.5) | 1.7(1.2, 2.1)    |
| Djibouti                              | Women | Overall           | 0.191   | 0.3(0.1, 0.6) | 24 (20, 29) | 1 (1, 2)       | 8 (6, 10)      | 0 (0, 0)    | 10 (8, 12)     | 8 (5, 11)     | 42 (33, 51)    | 1 (1, 2)    | 51 (41, 61)     | 0.6(0.4, 0.8) | 5.5(4.4, 6.6)    | 0.4(0.2, 0.5) | 2.2(1.8, 2.7)    |
| Djibouti                              | Men   | Ages 20 to 44     | 0.0714  | 0.6(0.2, 1.0) | 23 (20, 26) | 0 (0, 0)       | 2 (3, 3)       | 0 (0, 0)    | 2 (2, 3)       | 1 (1, 2)      | 17 (12, 22)    | 0 (0, 0)    | 19 (14, 24)     | 0.8(0.4, 1.3) | 13.1(9.3, 16.9)  | 0.4(0.2, 0.6) | 6.5(4.7, 8.2)    |
| Djibouti                              | Men   | Ages 45 to 64     | 0.0529  | 0.3(0.1, 0.5) | 24 (21, 27) | 0 (0, 0)       | 4 (2, 5)       | 0 (0, 0)    | 4 (3, 5)       | 6 (3, 9)      | 68 (45, 91)    | 1 (1, 2)    | 76 (52, 98)     | 0.4(0.2, 0.6) | 6.9(4.6, 9.2)    | 0.3(0.2, 0.5) | 3.1(2.1, 4.0)    |
| Djibouti                              | Men   | Ages 65 and older | 0.0631  | 0.2(0.1, 0.4) | 23 (20, 26) | 0 (0, 0)       | 3 (2, 4)       | 0 (0, 0)    | 3 (2, 4)       | 21 (10, 31)   | 213 (139, 286) | 3 (2, 5)    | 237 (160, 309)  | 0.2(0.1, 0.3) | 4.1(2.7, 5.5)    | 0.3(0.1, 0.4) | 1.7(1.1, 2.2)    |
| Djibouti                              | Men   | Overall           | 0.187   | 0.4(0.1, 0.6) | 23 (20, 26) | 1 (0, 1)       | 9 (7, 10)      | 0 (0, 0)    | 9 (8, 11)      | 4 (2, 6)      | 45 (36, 55)    | 1 (0, 1)    | 50 (40, 60)     | 0.4(0.2, 0.5) | 6.3(5.0, 7.5)    | 0.3(0.2, 0.5) | 2.7(2.1, 3.2)    |
| Djibouti                              | Both  | Overall           | 0.379   | 0.4(0.1, 0.6) | 24 (20, 28) | 2 (2, 3)       | 17 (14, 19)    | 0 (0, 1)    | 19 (17, 22)    | 6 (4, 8)      | 44 (38, 50)    | 1 (1, 1)    | 51 (44, 58)     | 0.5(0.3, 0.6) | 5.9(5.1, 6.8)    | 0.3(0.2, 0.5) | 2.4(2.1, 2.8)    |
|                                       |       |                   |         |               |             |                |                |             |                |               |                |             |                 |               |                  |               |                  |
| Dominica                              | Women | Ages 20 to 44     | 0.00527 | 2.0(0.7, 3.4) | 28 (27, 29) | 0 (0, 0)       | 0 (0, 0)       | 0 (0, 0)    | 0 (0, 0)       | 2 (1, 3)      | 28 (22, 34)    | 1 (1, 2)    | 32 (24, 38)     | 5.7(3.4, 8.6) | 32.5(24.8, 39.7) | 1.1(0.7, 1.7) | 15.1(11.6, 18.3) |
| Dominica                              | Women | Ages 45 to 64     | 0.00691 | 1.0(0.3, 1.7) | 30 (29, 32) | 0 (0, 0)       | 1 (1, 1)       | 0 (0, 0)    | 1 (1, 1)       | 10 (6, 15)    | 141 (98, 184)  | 5 (3, 7)    | 156 (111, 199)  | 2.6(1.4, 3.8) | 16.1(11.2, 21.0) | 0.9(0.5, 1.4) | 10.1(7.2, 12.9)  |
| Dominica                              | Women | Ages 65 and older | 0.00817 | 0.8(0.2, 1.3) | 28 (24, 32) | 0 (0, 1)       | 2 (2, 3)       | 0 (0, 0)    | 3 (2, 4)       | 120 (65, 184) | 773 (569, 963) | 22 (13, 33) | 915 (692, 1140) | 1.0(0.5, 1.5) | 6.6(4.8, 8.2)    | 0.8(0.4, 1.1) | 4.0(3.0, 4.9)    |
| Dominica                              | Women | Overall           | 0.0203  | 1.3(0.4, 2.2) | 29 (26, 31) | 0 (0, 1)       | 4 (3, 4)       | 0 (0, 0)    | 4 (3, 5)       | 23 (13, 35)   | 184 (146, 221) | 6 (4, 8)    | 213 (169, 255)  | 1.1(0.6, 1.7) | 8.4(6.7, 10.1)   | 0.8(0.5, 1.2) | 5.0(4.0, 6.0)    |
| Dominica                              | Men   | Ages 20 to 44     | 0.00526 | 2.2(0.7, 3.7) | 24 (23, 25) | 0 (0, 0)       | 0 (0, 0)       | 0 (0, 0)    | 1 (0, 1)       | 3 (2, 5)      | 46 (34, 56)    | 1 (1, 2)    | 50 (38, 61)     | 4.3(2.7, 6.3) | 32.2(24.1, 39.3) | 0.7(0.3, 1.3) | 15.6(11.9, 18.9) |
| Dominica                              | Men   | Ages 45 to 64     | 0.00651 | 1.0(0.3, 1.7) | 25 (24, 26) | 0 (0, 0)       | 1 (1, 2)       | 0 (0, 0)    | 1 (1, 2)       | 19 (13, 27)   | 187 (133, 243) | 4 (3, 6)    | 210 (155, 268)  | 1.5(1.0, 2.1) | 16.2(11.6, 21.0) | 0.5(0.3, 0.8) | 7.4(5.5, 9.5)    |
| Dominica                              | Men   | Ages 65 and older | 0.00754 | 0.8(0.3, 1.3) | 23 (21, 25) | 0 (0, 0)       | 2 (1, 2)       | 0 (0, 0)    | 2 (1, 2)       | 63 (32, 98)   | 672 (486, 845) | 9 (5, 14)   | 744 (549, 925)  | 0.5(0.2, 0.7) | 6.9(5.0, 8.7)    | 0.2(0.1, 0.4) | 3.2(2.3, 3.9)    |
| Dominica                              | Men   | Overall           | 0.0193  | 1.4(0.4, 2.3) | 24 (23, 26) | 0 (0, 0)       | 3 (3, 4)       | 0 (0, 0)    | 4 (3, 5)       | 17 (11, 23)   | 181 (149, 212) | 3 (2, 5)    | 201 (168, 235)  | 0.7(0.5, 1.0) | 9.9(8.2, 11.6)   | 0.4(0.2, 0.5) | 4.6(3.8, 5.3)    |
| Dominica                              | Both  | Overall           | 0.0397  | 1.3(0.4, 2.2) | 26 (25, 28) | 1 (1, 1)       | 7 (6, 8)       | 0 (0, 0)    | 8 (7, 9)       | 20 (14, 28)   | 182 (156, 207) | 5 (3, 6)    | 207 (178, 236)  | 0.9(0.6, 1.3) | 9.1(7.8, 10.3)   | 0.6(0.4, 0.8) | 4.8(4.1, 5.5)    |
|                                       |       |                   |         |               |             |                |                |             |                |               |                |             |                 |               |                  |               |                  |
| Dominican Republic                    | Women | Ages 20 to 44     | 0.767   | 1.6(0.5, 2.7) | 26 (25, 28) | 7 (4, 10)      | 27 (20, 33)    | 1 (1, 1)    | 35 (27, 42)    | 5 (3, 7)      | 19 (15, 24)    | 1 (0, 1)    | 25 (20, 30)     | 3.8(2.3, 5.4) | 27.2(20.5, 33.3) | 0.9(0.5, 1.3) | 9.3(7.3, 11.3)   |
| Dominican Republic                    | Women | Ages 45 to 64     | 0.794   | 0.8(0.2, 1.3) | 28 (26, 31) | 19 (11, 26)    | 68 (47, 88)    | 2 (1, 3)    | 89 (64, 111)   | 24 (14, 33)   | 86 (60, 111)   | 3 (2, 4)    | 112 (81, 140)   | 1.9(1.1, 2.6) | 13.4(9.3, 17.4)  | 0.6(0.3, 0.9) | 5.0(3.6, 6.2)    |
| Dominican Republic                    | Women | Ages 65 and older | 0.944   | 0.6(0.2, 1.0) | 27 (24, 29) | 52 (30, 80)    | 132 (98, 166)  | 3 (2, 5)    | 187 (143, 236) | 164 (95, 251) | 413 (308, 520) | 10 (6, 14)  | 587 (448, 740)  | 0.7(0.4, 1.1) | 5.8(4.4, 7.4)    | 0.4(0.3, 0.6) | 1.9(1.5, 2.4)    |
| Dominican Republic                    | Women | Overall           | 2.51    | 1.0(0.3, 1.7) | 27 (25, 29) | 78 (46, 114)   | 227 (187, 268) | 6 (4, 9)    | 311 (251, 377) | 31 (18, 46)   | 91 (75, 107)   | 2 (2, 4)    | 124 (100, 151)  | 0.9(0.6, 1.4) | 7.9(6.5, 9.4)    | 0.5(0.3, 0.7) | 2.6(2.1, 3.2)    |
| Dominican Republic                    | Men   | Ages 20 to 44     | 0.759   | 1.7(0.5, 2.9) | 25 (23, 26) | 11 (7, 16)     | 36 (26, 44)    | 1 (0, 1)    | 47 (36, 59)    | 8 (5, 12)     | 26 (19, 32)    | 0 (0, 1)    | 34 (26, 43)     | 4.0(2.4, 5.8) | 28.4(20.8, 35.1) | 0.6(0.4, 1.0) | 11.2(8.6, 13.9)  |
| Dominican Republic                    | Men   | Ages 45 to 64     | 0.791   | 0.8(0.2, 1.4) | 26 (24, 28) | 38 (23, 54)    | 94 (65, 119)   | 2 (1, 2)    | 133 (97, 168)  | 48 (29, 68)   | 118 (83, 150)  | 2 (1, 3)    | 169 (123, 213)  | 2.0(1.2, 2.8) | 14.5(10.2, 18.4) | 0.5(0.3, 0.8) | 5.0(3.6, 6.3)    |
| Dominican Republic                    | Men   | Ages 65 and older | 0.921   | 0.6(0.2, 1.0) | 24 (23, 26) | 43 (28, 59)    | 98 (74, 121)   | 2 (1, 3)    | 143 (113, 173) | 143 (93, 195) | 321 (243, 399) | 7 (4, 9)    | 470 (371, 569)  | 0.6(0.4, 0.8) | 6.4(4.8, 7.9)    | 0.2(0.2, 0.4) | 1.5(1.2, 1.8)    |
| Dominican Republic                    | Men   | Overall           | 2.47    | 1.1(0.3, 1.8) | 25 (23, 27) | 93 (60, 128)   | 227 (187, 265) | 4 (3, 5)    | 324 (262, 383) | 38 (24, 52)   | 92 (76, 107)   | 2 (1, 2)    | 131 (106, 155)  | 0.9(0.6, 1.3) | 9.9(8.1, 11.5)   | 0.3(0.2, 0.5) | 2.5(2.1, 3.0)    |
| Dominican Republic                    | Both  | Overall           | 4.98    | 1.0(0.3, 1.8) | 26 (24, 28) | 171 (108, 237) | 454 (394, 515) | 10 (7, 14)  | 635 (530, 745) | 34 (22, 48)   | 91 (79, 104)   | 2 (1, 3)    | 128 (107, 150)  | 0.9(0.6, 1.3) | 8.8(7.6, 10.0)   | 0.5(0.3, 0.7) | 2.6(2.2, 3.0)    |
|                                       |       |                   |         |               |             |                |                |             |                |               |                |             |                 |               |                  |               |                  |
| Ecuador                               | Women | Ages 20 to 44     | 1.17    | 0.7(0.2, 1.2) | 26 (25, 28) | 5 (3, 7)       | 18 (13, 24)    | 1 (0, 1)    | 24 (17, 30)    | 2 (1, 3)      | 9 (6, 11)      | 0 (0, 0)    | 11 (8, 15)      | 2.4(1.4, 3.5) | 16.1(11.3, 20.9) | 0.5(0.3, 0.8) | 5.8(4.3, 7.4)    |
| Ecuador</                             |       |                   |         |               |             |                |                |             |                |               |                |             |                 |               |                  |               |                  |

|                   |       |                   |        |                |             |              |                |           |                |               |                  |            |                   |                |                   |                |                   |
|-------------------|-------|-------------------|--------|----------------|-------------|--------------|----------------|-----------|----------------|---------------|------------------|------------|-------------------|----------------|-------------------|----------------|-------------------|
| El Salvador       | Women | Overall           | 1.61   | 1.4 (0.4, 2.4) | 27 (26, 29) | 38 (25, 52)  | 251 (208, 295) | 6 (4, 8)  | 294 (246, 342) | 23 (15, 32)   | 156 (129, 183)   | 4 (2, 5)   | 183 (153, 212)    | 1.0 (0.6, 1.3) | 10.9 (9.0, 12.8)  | 0.9 (0.5, 1.2) | 4.7 (4.0, 5.5)    |
| El Salvador       | Men   | Ages 20 to 44     | 0.413  | 2.3 (0.6, 3.9) | 26 (24, 28) | 10 (6, 14)   | 33 (25, 39)    | 1 (0, 1)  | 43 (33, 52)    | 14 (9, 20)    | 46 (35, 55)      | 1 (1, 1)   | 61 (47, 73)       | 5.5 (3.4, 7.7) | 35.3 (27.0, 42.2) | 0.9 (0.5, 1.3) | 14.7 (11.4, 17.8) |
| El Salvador       | Men   | Ages 45 to 64     | 0.368  | 1.2 (0.3, 2.1) | 27 (25, 29) | 14 (8, 20)   | 67 (46, 86)    | 1 (0, 1)  | 82 (60, 102)   | 37 (22, 53)   | 182 (126, 234)   | 2 (1, 3)   | 222 (162, 277)    | 2.6 (1.6, 3.8) | 19.0 (13.1, 24.3) | 0.7 (0.4, 1.1) | 9.7 (7.1, 12.1)   |
| El Salvador       | Men   | Ages 65 and older | 0.481  | 0.9 (0.2, 1.5) | 26 (23, 28) | 19 (12, 26)  | 70 (50, 89)    | 1 (1, 2)  | 90 (68, 113)   | 102 (65, 142) | 381 (270, 485)   | 8 (5, 10)  | 490 (368, 612)    | 0.7 (0.5, 1.0) | 8.0 (5.7, 10.2)   | 0.5 (0.4, 0.7) | 2.6 (1.9, 3.2)    |
| El Salvador       | Men   | Overall           | 1.26   | 1.5 (0.4, 2.5) | 26 (24, 28) | 42 (27, 59)  | 170 (141, 198) | 3 (2, 4)  | 215 (179, 254) | 33 (21, 47)   | 135 (112, 157)   | 2 (1, 3)   | 170 (142, 201)    | 1.3 (0.8, 1.8) | 12.8 (10.6, 15.0) | 0.6 (0.4, 0.9) | 4.6 (3.9, 5.5)    |
| El Salvador       | Both  | Overall           | 2.87   | 1.4 (0.4, 2.5) | 27 (25, 28) | 80 (52, 109) | 421 (370, 476) | 8 (5, 12) | 510 (440, 581) | 28 (18, 38)   | 147 (129, 166)   | 3 (2, 4)   | 177 (153, 202)    | 1.1 (0.7, 1.5) | 11.6 (10.2, 13.1) | 0.8 (0.5, 1.1) | 4.7 (4.0, 5.3)    |
| Equatorial Guinea | Women | Ages 20 to 44     | 0.0405 | 1.0 (0.3, 1.7) | 24 (20, 28) | 0 (0, 0)     | 1 (1, 1)       | 0 (0, 0)  | 1 (1, 1)       | 2 (1, 3)      | 12 (9, 15)       | 0 (0, 0)   | 14 (10, 17)       | 2.3 (1.4, 3.4) | 19.4 (14.1, 24.4) | 0.6 (0.3, 0.8) | 8.1 (6.0, 10.0)   |
| Equatorial Guinea | Women | Ages 45 to 64     | 0.0473 | 0.5 (0.1, 0.8) | 26 (22, 30) | 0 (0, 1)     | 2 (1, 3)       | 0 (0, 0)  | 3 (2, 3)       | 9 (5, 13)     | 43 (30, 56)      | 1 (1, 2)   | 53 (39, 68)       | 1.5 (0.9, 2.2) | 10.4 (7.2, 13.6)  | 0.5 (0.3, 0.8) | 4.4 (3.2, 5.7)    |
| Equatorial Guinea | Women | Ages 65 and older | 0.0493 | 0.4 (0.1, 0.6) | 25 (19, 30) | 1 (0, 1)     | 2 (1, 2)       | 0 (0, 0)  | 2 (2, 3)       | 49 (32, 66)   | 169 (118, 219)   | 4 (3, 5)   | 221 (164, 279)    | 0.4 (0.3, 0.6) | 5.3 (3.7, 6.9)    | 0.4 (0.2, 0.5) | 1.5 (1.1, 1.8)    |
| Equatorial Guinea | Women | Overall           | 0.137  | 0.6 (0.2, 1.1) | 25 (20, 29) | 1 (1, 1)     | 5 (4, 6)       | 0 (0, 0)  | 6 (5, 7)       | 8 (5, 11)     | 34 (28, 41)      | 1 (1, 1)   | 43 (35, 51)       | 0.7 (0.5, 1.0) | 8.3 (6.8, 9.8)    | 0.5 (0.3, 0.6) | 2.6 (2.1, 3.1)    |
| Equatorial Guinea | Men   | Ages 20 to 44     | 0.0437 | 1.1 (0.3, 1.9) | 23 (21, 26) | 0 (0, 0)     | 2 (1, 2)       | 0 (0, 0)  | 2 (1, 3)       | 2 (1, 4)      | 21 (15, 27)      | 0 (0, 0)   | 24 (17, 30)       | 1.3 (0.6, 1.9) | 19.1 (13.4, 24.9) | 0.3 (0.2, 0.5) | 7.8 (5.6, 10.1)   |
| Equatorial Guinea | Men   | Ages 45 to 64     | 0.0556 | 0.5 (0.1, 0.9) | 25 (21, 28) | 1 (0, 1)     | 4 (3, 6)       | 0 (0, 0)  | 5 (4, 7)       | 11 (6, 16)    | 79 (53, 104)     | 1 (0, 2)   | 91 (63, 118)      | 0.6 (0.3, 1.0) | 10.3 (7.0, 13.6)  | 0.3 (0.2, 0.5) | 3.6 (2.5, 4.7)    |
| Equatorial Guinea | Men   | Ages 65 and older | 0.0532 | 0.4 (0.1, 0.7) | 24 (20, 27) | 0 (0, 1)     | 2 (1, 3)       | 0 (0, 0)  | 3 (2, 3)       | 39 (20, 60)   | 215 (143, 289)   | 4 (2, 6)   | 258 (179, 335)    | 0.3 (0.2, 0.5) | 5.5 (3.7, 7.4)    | 0.2 (0.1, 0.4) | 1.5 (1.0, 1.9)    |
| Equatorial Guinea | Men   | Overall           | 0.152  | 0.7 (0.2, 1.2) | 24 (21, 27) | 1 (1, 2)     | 8 (7, 10)      | 0 (0, 0)  | 10 (8, 12)     | 8 (4, 12)     | 54 (44, 66)      | 1 (0, 1)   | 64 (50, 76)       | 0.5 (0.3, 0.8) | 9.2 (7.3, 11.0)   | 0.3 (0.1, 0.5) | 2.8 (2.2, 3.4)    |
| Equatorial Guinea | Both  | Overall           | 0.29   | 0.7 (0.2, 1.2) | 24 (20, 28) | 2 (1, 3)     | 13 (11, 15)    | 0 (0, 0)  | 16 (13, 18)    | 8 (5, 11)     | 45 (39, 52)      | 1 (1, 1)   | 54 (46, 62)       | 0.6 (0.4, 0.8) | 8.8 (7.6, 10.1)   | 0.4 (0.3, 0.5) | 2.7 (2.3, 3.1)    |
| Eritrea           | Women | Ages 20 to 44     | 0.468  | 0.1 (0.0, 0.2) | 21 (20, 22) | 0 (0, 0)     | 2 (1, 3)       | 0 (0, 0)  | 3 (2, 4)       | 0 (0, 1)      | 3 (2, 5)         | 0 (0, 0)   | 4 (2, 5)          | 0.3 (0.1, 0.5) | 4.1 (2.3, 6.2)    | 0.1 (0.0, 0.2) | 1.3 (0.7, 1.8)    |
| Eritrea           | Women | Ages 45 to 64     | 0.243  | 0.1 (0.0, 0.1) | 22 (20, 23) | 1 (1, 2)     | 10 (7, 14)     | 0 (0, 1)  | 12 (8, 15)     | 5 (2, 7)      | 41 (27, 57)      | 1 (1, 2)   | 48 (32, 63)       | 0.3 (0.1, 0.5) | 4.4 (2.9, 6.1)    | 0.2 (0.1, 0.3) | 1.4 (1.0, 1.9)    |
| Eritrea           | Women | Ages 65 and older | 0.343  | 0.0 (0.0, 0.1) | 21 (18, 25) | 2 (1, 2)     | 11 (7, 15)     | 0 (0, 0)  | 13 (8, 17)     | 19 (9, 29)    | 135 (83, 184)    | 3 (2, 5)   | 157 (103, 208)    | 0.1 (0.1, 0.2) | 2.5 (1.5, 3.4)    | 0.2 (0.1, 0.2) | 0.8 (0.5, 1.0)    |
| Eritrea           | Women | Overall           | 1.05   | 0.1 (0.0, 0.1) | 21 (19, 23) | 3 (1, 4)     | 23 (17, 29)    | 1 (0, 1)  | 27 (21, 33)    | 3 (1, 4)      | 22 (17, 27)      | 1 (0, 1)   | 25 (20, 31)       | 0.2 (0.1, 0.3) | 3.2 (2.4, 4.0)    | 0.2 (0.1, 0.2) | 1.0 (0.8, 1.2)    |
| Eritrea           | Men   | Ages 20 to 44     | 0.46   | 0.1 (0.0, 0.2) | 21 (20, 22) | 0 (0, 0)     | 4 (2, 5)       | 0 (0, 0)  | 4 (2, 6)       | 0 (0, 1)      | 5 (3, 7)         | 0 (0, 0)   | 5 (3, 8)          | 0.2 (0.1, 0.3) | 3.5 (1.9, 5.2)    | 0.2 (0.1, 0.3) | 1.7 (0.9, 2.4)    |
| Eritrea           | Men   | Ages 45 to 64     | 0.187  | 0.1 (0.0, 0.1) | 21 (20, 22) | 1 (0, 1)     | 10 (6, 13)     | 0 (0, 0)  | 11 (7, 14)     | 5 (2, 7)      | 51 (34, 70)      | 1 (1, 2)   | 57 (39, 77)       | 0.3 (0.1, 0.4) | 4.5 (3.0, 6.2)    | 0.2 (0.1, 0.4) | 1.8 (1.2, 2.4)    |
| Eritrea           | Men   | Ages 65 and older | 0.31   | 0.0 (0.0, 0.1) | 21 (19, 23) | 0 (0, 0)     | 0 (0, 0)       | 0 (0, 0)  | 0 (0, 0)       | 0 (0, 0)      | 0 (0, 0)         | 0 (0, 0)   | 0 (0, 0)          | 0.0 (0.0, 0.0) | 0.0 (0.0, 0.0)    | 0.0 (0.0, 0.0) | 0.0 (0.0, 0.0)    |
| Eritrea           | Men   | Overall           | 0.956  | 0.1 (0.0, 0.1) | 21 (19, 22) | 1 (1, 2)     | 13 (9, 17)     | 0 (0, 1)  | 15 (11, 18)    | 1 (1, 2)      | 14 (10, 18)      | 0 (0, 1)   | 15 (11, 19)       | 0.1 (0.1, 0.2) | 2.3 (1.6, 3.0)    | 0.1 (0.0, 0.2) | 0.9 (0.7, 1.1)    |
| Eritrea           | Both  | Overall           | 2.01   | 0.1 (0.0, 0.1) | 21 (19, 23) | 4 (2, 6)     | 36 (30, 43)    | 1 (1, 2)  | 41 (34, 49)    | 2 (1, 3)      | 18 (15, 21)      | 1 (0, 1)   | 21 (17, 24)       | 0.2 (0.1, 0.2) | 2.8 (2.3, 3.3)    | 0.1 (0.1, 0.2) | 1.0 (0.8, 1.1)    |
| Estonia           | Women | Ages 20 to 44     | 0.0972 | 0.5 (0.2, 0.9) | 24 (22, 26) | 0 (0, 0)     | 1 (0, 1)       | 0 (0, 0)  | 1 (0, 1)       | 0 (0, 0)      | 3 (2, 3)         | 0 (0, 0)   | 3 (2, 4)          | 0.8 (0.4, 1.2) | 12.9 (9.2, 16.5)  | 0.2 (0.1, 0.3) | 3.8 (2.8, 4.8)    |
| Estonia           | Women | Ages 45 to 64     | 0.191  | 0.3 (0.1, 0.4) | 27 (24, 29) | 2 (1, 2)     | 2 (1, 3)       | 0 (0, 1)  | 4 (3, 5)       | 8 (5, 12)     | 11 (8, 15)       | 2 (1, 3)   | 21 (16, 28)       | 0.9 (0.6, 1.3) | 7.1 (4.8, 9.5)    | 0.3 (0.2, 0.4) | 1.1 (0.8, 1.5)    |
| Estonia           | Women | Ages 65 and older | 0.245  | 0.2 (0.1, 0.3) | 27 (24, 29) | 15 (8, 24)   | 6 (5, 8)       | 1 (1, 2)  | 22 (15, 31)    | 99 (53, 154)  | 40 (30, 49)      | 7 (4, 11)  | 146 (95, 205)     | 0.3 (0.2, 0.5) | 3.5 (2.6, 4.3)    | 0.2 (0.1, 0.3) | 0.4 (0.3, 0.6)    |
| Estonia           | Women | Overall           | 0.534  | 0.3 (0.1, 0.6) | 26 (23, 28) | 17 (9, 26)   | 9 (7, 10)      | 2 (1, 2)  | 27 (19, 37)    | 31 (17, 48)   | 16 (13, 20)      | 3 (2, 4)   | 51 (35, 70)       | 0.3 (0.2, 0.5) | 4.2 (3.4, 5.0)    | 0.2 (0.1, 0.3) | 0.4 (0.3, 0.6)    |
| Estonia           | Men   | Ages 20 to 44     | 0.0991 | 0.6 (0.2, 1.0) | 25 (24, 27) | 0 (0, 1)     | 1 (1, 2)       | 0 (0, 0)  | 1 (1, 2)       | 2 (1, 3)      | 5 (4, 7)         | 0 (0, 0)   | 8 (6, 10)         | 1.8 (1.0, 2.6) | 14.0 (10.0, 17.9) | 0.2 (0.1, 0.3) | 3.8 (3.0, 4.7)    |
| Estonia           | Men   | Ages 45 to 64     | 0.156  | 0.3 (0.1, 0.5) | 28 (26, 29) | 6 (3, 8)     | 3 (2, 4)       | 1 (0, 1)  | 10 (7, 13)     | 38 (22, 54)   | 20 (13, 26)      | 3 (2, 5)   | 61 (43, 81)       | 1.0 (0.6, 1.4) | 7.5 (5.0, 9.8)    | 0.3 (0.2, 0.5) | 1.2 (0.8, 1.6)    |
| Estonia           | Men   | Ages 65 and older | 0.163  | 0.2 (0.1, 0.3) | 27 (25, 29) | 12 (7, 18)   | 3 (2, 4)       | 1 (1, 1)  | 17 (11, 23)    | 163 (99, 238) | 44 (31, 58)      | 13 (8, 18) | 220 (146, 301)    | 0.5 (0.3, 0.7) | 4.2 (3.0, 5.5)    | 0.2 (0.1, 0.2) | 0.5 (0.3, 0.7)    |
| Estonia           | Men   | Overall           | 0.418  | 0.4 (0.1, 0.6) | 27 (25, 28) | 19 (11, 27)  | 7 (6, 9)       | 2 (1, 2)  | 28 (19, 36)    | 44 (27, 64)   | 18 (14, 21)      | 4 (2, 5)   | 66 (46, 87)       | 0.6 (0.3, 0.8) | 5.8 (4.7, 7.0)    | 0.2 (0.1, 0.3) | 0.7 (0.5, 0.9)    |
| Estonia           | Both  | Overall           | 0.952  | 0.3 (0.1, 0.6) | 26 (24, 28) | 35 (21, 52)  | 16 (14, 19)    | 3 (2, 4)  | 55 (38, 73)    | 37 (22, 54)   | 17 (15, 19)      | 3 (2, 5)   | 57 (40, 76)       | 0.4 (0.3, 0.6) | 4.8 (4.1, 5.5)    | 0.2 (0.1, 0.3) | 0.5 (0.4, 0.7)    |
| Ethiopia          | Women | Ages 20 to 44     | 5.79   | 0.1 (0.0, 0.2) | 21 (20, 22) | 0 (0, 0)     | 0 (0, 0)       | 0 (0, 0)  | 0 (0, 0)       | 0 (0, 0)      | 0 (0, 0)         | 0 (0, 0)   | 0 (0, 0)          | 0.0 (0.0, 0.0) | 0.0 (0.0, 0.0)    | 0.0 (0.0, 0.0) | 0.0 (0.0, 0.0)    |
| Ethiopia          | Women | Ages 45 to 64     | 4.55   | 0.1 (0.0, 0.1) | 21 (20, 22) | 12 (6, 19)   | 156 (106, 209) | 5 (3, 8)  | 173 (120, 229) | 3 (1, 4)      | 34 (23, 46)      | 1 (1, 2)   | 38 (26, 50)       | 0.3 (0.2, 0.5) | 4.7 (3.2, 6.3)    | 0.1 (0.1, 0.2) | 1.7 (1.2, 2.3)    |
| Ethiopia          | Women | Ages 65 and older | 5.45   | 0.1 (0.0, 0.1) | 20 (17, 23) | 0 (0, 0)     | 0 (0, 0)       | 0 (0, 0)  | 0 (0, 0)       | 0 (0, 0)      | 0 (0, 0)         | 0 (0, 0)   | 0 (0, 0)          | 0.0 (0.0, 0.0) | 0.0 (0.0, 0.0)    | 0.0 (0.0, 0.0) | 0.0 (0.0, 0.0)    |
| Ethiopia          | Women | Overall           | 15.8   | 0.1 (0.0, 0.2) | 21 (19, 22) | 12 (6, 19)   | 156 (106, 209) | 5 (3, 8)  | 173 (120, 229) | 1 (0, 1)      | 10 (7, 13)       | 0 (0, 0)   | 11 (8, 14)        | 0.1 (0.0, 0.1) | 1.4 (1.0, 1.9)    | 0.1 (0.0, 0.1) | 0.5 (0.4, 0.7)    |
| Ethiopia          | Men   | Ages 20 to 44     | 5.73   | 0.2 (0.0, 0.3) | 20 (19, 21) | 0 (0, 0)     | 0 (0, 0)       | 0 (0, 0)  | 0 (0, 0)       | 0 (0, 0)      | 0 (0, 0)         | 0 (0, 0)   | 0 (0, 0)          | 0.0 (0.0, 0.0) | 0.0 (0.0, 0.0)    | 0.0 (0.0, 0.0) | 0.0 (0.0, 0.0)    |
| Ethiopia          | Men   | Ages 45 to 64     | 4.25   | 0.1 (0.0, 0.1) | 21 (19, 22) | 0 (0, 0)     | 0 (0, 0)       | 0 (0, 0)  | 0 (0, 0)       | 0 (0, 0)      | 0 (0, 0)         | 0 (0, 0)   | 0 (0, 0)          | 0.0 (0.0, 0.0) | 0.0 (0.0, 0.0)    | 0.0 (0.0, 0.0) | 0.0 (0.0, 0.0)    |
| Ethiopia          | Men   | Ages 65 and older | 5.21   | 0.1 (0.0, 0.1) | 21 (19, 23) | 0 (0, 0)     | 0 (0, 0)       | 0 (0, 0)  | 0 (0, 0)       | 0 (0, 0)      | 0 (0, 0)         | 0 (0, 0)   | 0 (0, 0)          | 0.0 (0.0, 0.0) | 0.0 (0.0, 0.0)    | 0.0 (0.0, 0.0) | 0.0 (0.0, 0.0)    |
| Ethiopia          | Men   | Overall           | 15.2   | 0.1 (0.0, 0.2) | 20 (19, 22) | 0 (0, 0)     | 0 (0, 0)       | 0 (0, 0)  | 0 (0, 0)       | 0 (0, 0)      | 0 (0, 0)         | 0 (0, 0)   | 0 (0, 0)          | 0.0 (0.0, 0.0) | 0.0 (0.0, 0.0)    | 0.0 (0.0, 0.0) | 0.0 (0.0, 0.0)    |
| Ethiopia          | Both  | Overall           | 31     | 0.1 (0.0, 0.2) | 21 (19, 22) | 12 (6, 19)   | 156 (106, 209) | 5 (3, 8)  | 173 (120, 229) | 0 (0, 1)      | 5 (3, 7)         | 0 (0, 0)   | 6 (4, 7)          | 0.0 (0.0, 0.1) | 0.8 (0.5, 1.1)    | 0.1 (0.0, 0.1) | 0.3 (0.2, 0.4)    |
| Fiji              | Women | Ages 20 to 44     | 0.0696 | 1.1 (0.3, 2.0) | 28 (27, 29) | 1 (1, 1)     | 14 (10, 18)    | 0 (0, 0)  | 15 (11, 20)    | 8 (5, 12)     | 114 (79, 150)    | 2 (1, 2)   | 123 (88, 160)     | 3.0 (1.8, 4.2) | 20.5 (14.3, 27.0) | 0.7 (0.4, 1.0) | 14.3 (10.2, 18.5) |
| Fiji              | Women | Ages 45 to 64     | 0.0788 | 0.6 (0.1, 1.0) | 32 (30, 34) | 3 (2, 4)     | 45 (31, 58)    | 0 (0, 0)  | 48 (34, 61)    | 35 (22, 51)   | 569 (388, 736)   | 4 (2, 6)   | 608 (429, 780)    | 1.5 (0.9, 2.1) | 10.9 (7.4, 14.1)  | 0.5 (0.3, 0.7) | 9.3 (6.6, 12.0)   |
| Fiji              | Women | Ages 65 and older | 0.0753 | 0.4 (0.1, 0.7) | 30 (26, 33) | 3 (2, 4)     | 36 (24, 47)    | 0 (0, 0)  | 39 (27, 50)    | 121 (72, 171) | 606 (1081, 2111) | 10 (6, 14) | 1737 (1198, 2252) | 0.7 (0.4, 1.0) | 6.2 (4.2, 8.1)    | 0.5 (0.3, 0.7) | 4.9 (3.4, 6.4)    |
| Fiji              | Women | Overall           | 0.224  | 0.7 (0.2, 1.2) | 29 (27, 32) | 6 (4, 9)     | 95 (75, 112)   | 1 (0, 1)  | 102 (82, 120)  | 29 (17, 41)   | 423 (337, 501)   | 3 (2, 5)   | 455 (366, 537)    | 1.1 (0.6, 1.5) | 8.9 (7.1, 10.6)   | 0.5 (0.3, 0.8) | 7.3 (5.8, 8.6)    |
| Fiji              | Men   | Ages 20 to 44     | 0.0733 | 1.2 (0.4, 2.1) | 26 (25, 27) | 3 (2, 5)     | 10 (7, 13)     | 0 (0, 0)  | 14 (10, 17)    | 26 (16, 37)   | 81 (57, 103)     | 0 (0, 1)   | 107 (79, 135)     | 2.9 (1.8, 4.2) | 21.9 (15.4, 28.0) | 0.8 (0.5, 1.2) | 9.0 (6.6, 11.3)   |
| Fiji              | Men   | Ages 45 to 64     | 0.0805 | 0.6 (0.2, 1.0) | 28 (26, 29) | 7 (4, 10)    | 46 (32, 61)    | 0 (0, 0)  | 54 (38, 69)    | 89 (54, 126)  | 574 (396, 757)   | 2 (1, 3)   | 666 (472, 859)    | 1.5 (0.9, 2.1) | 11.5 (8.0, 15.0)  | 0.5 (0.3, 0.8) | 7.0 (4.9, 9.0)    |
| Fiji              | Men   | Ages 65 and older | 0.0749 | 0.4 (0.1, 0.7) | 27 (25, 29) | 3 (2, 4)     | 30 (19, 40)    | 0 (0, 0)  | 33 (23, 44)    | 154 (92, 217) | 552 (1009, 2071) | 9 (5, 12)  | 1715 (1171, 2271) | 0.8 (0.5, 1.1) | 6.6 (4.3, 8.9)    | 0.6 (0.3, 0.9) | 4.8 (3.3, 6.3)    |
| Fiji              | Men   | Overall           | 0.229  | 0.8 (0.2, 1.3) | 27 (25, 28) | 14 (8, 19)   | 87 (68, 105)   | 0 (0, 1)  | 101 (81, 121)  | 59 (36, 83)   | 379 (298, 459)   | 2 (1, 2)   | 439 (353, 530)    | 1.4 (0.8, 1.9) | 9.6 (7.6, 11.7)   | 0.6 (0.3, 0.8) | 6.2 (5.0, 7.5)    |
| Fiji              | Both  | Overall           | 0.452  | 0.7 (0.2, 1.3) | 28 (26, 30) | 20 (12, 28)  | 181 (152, 208) | 1 (1, 2)  | 202 (170, 232) | 44 (27, 62)   | 400 (336, 460)   | 2 (1, 4)   | 447 (376, 513)    | 1.3 (0.8, 1.8) | 9.3 (7.8, 10.6)   | 0.5 (0.3, 0.8) | 6.7 (5.6, 7.7)    |
| Finland           | Women | Ages 20 to 44     | 0.331  | 0.7 (0.5, 0.8) | 24 (23, 25) | 0 (0, 0)     | 2 (2, 3)       | 0 (0, 0)  | 3 (2, 3)       |               |                  |            |                   |                |                   |                |                   |

|         |       |                   |        |                |             |                  |                   |                   |                   |                |                |             |                 |                 |                   |                |                   |
|---------|-------|-------------------|--------|----------------|-------------|------------------|-------------------|-------------------|-------------------|----------------|----------------|-------------|-----------------|-----------------|-------------------|----------------|-------------------|
| Gabon   | Women | Ages 20 to 44     | 0.116  | 3.8 (0.9, 6.7) | 25 (24, 26) | 2 (1, 2)         | 9 (7, 10)         | 0 (0, 0)          | 11 (9, 12)        | 8 (5, 11)      | 45 (36, 52)    | 1 (1, 2)    | 54 (44, 63)     | 9.1 (5.5, 13.2) | 47.5 (38.4, 54.7) | 2.1 (1.2, 3.0) | 23.7 (19.1, 27.7) |
| Gabon   | Women | Ages 45 to 64     | 0.0958 | 1.8 (0.4, 3.2) | 27 (26, 29) | 4 (2, 6)         | 22 (16, 28)       | 1 (0, 1)          | 26 (20, 33)       | 41 (24, 59)    | 228 (168, 288) | 7 (4, 10)   | 276 (208, 344)  | 4.1 (2.4, 5.9)  | 25.5 (18.7, 32.2) | 1.5 (0.8, 2.1) | 12.7 (9.6, 15.9)  |
| Gabon   | Women | Ages 65 and older | 0.117  | 1.3 (0.3, 2.4) | 25 (22, 28) | 6 (4, 8)         | 23 (17, 29)       | 0 (0, 1)          | 29 (22, 36)       | 159 (107, 217) | 661 (482, 832) | 13 (9, 19)  | 833 (640, 1018) | 1.1 (0.7, 1.5)  | 12.9 (9.4, 16.3)  | 0.9 (0.6, 1.3) | 4.1 (3.1, 5.0)    |
| Gabon   | Women | Overall           | 0.328  | 2.4 (0.6, 4.2) | 26 (24, 28) | 11 (7, 15)       | 54 (45, 62)       | 1 (1, 2)          | 66 (56, 76)       | 34 (22, 46)    | 164 (136, 189) | 4 (3, 6)    | 202 (170, 233)  | 1.8 (1.1, 2.4)  | 20.4 (15.8, 21.9) | 1.3 (0.8, 1.8) | 6.8 (5.8, 7.9)    |
| Gabon   | Men   | Ages 20 to 44     | 0.116  | 4.1 (1.2, 6.9) | 24 (23, 24) | 2 (1, 3)         | 14 (11, 16)       | 0 (0, 0)          | 16 (13, 19)       | 11 (6, 16)     | 70 (54, 80)    | 1 (0, 1)    | 81 (64, 94)     | 4.1 (2.2, 6.3)  | 44.0 (33.8, 50.5) | 1.0 (0.5, 1.6) | 19.7 (15.5, 22.9) |
| Gabon   | Men   | Ages 45 to 64     | 0.0966 | 2.0 (0.6, 3.3) | 25 (24, 26) | 5 (3, 8)         | 13 (23, 42)       | 0 (0, 1)          | 38 (28, 48)       | 52 (26, 78)    | 340 (241, 435) | 5 (2, 7)    | 397 (287, 496)  | 1.8 (0.9, 2.7)  | 24.7 (17.5, 31.7) | 0.9 (0.4, 1.4) | 8.9 (6.5, 11.2)   |
| Gabon   | Men   | Ages 65 and older | 0.112  | 1.4 (0.4, 2.5) | 24 (22, 26) | 4 (2, 6)         | 22 (15, 29)       | 0 (0, 1)          | 27 (19, 34)       | 136 (69, 206)  | 735 (505, 963) | 13 (7, 20)  | 884 (629, 1139) | 0.8 (0.4, 1.1)  | 13.5 (9.3, 17.6)  | 0.6 (0.3, 1.0) | 3.6 (2.6, 4.7)    |
| Gabon   | Men   | Overall           | 0.325  | 2.6 (0.8, 4.3) | 24 (23, 25) | 11 (6, 17)       | 69 (56, 81)       | 1 (1, 1)          | 81 (65, 96)       | 35 (18, 52)    | 212 (174, 251) | 3 (2, 4)    | 250 (201, 296)  | 1.3 (0.7, 1.9)  | 20.9 (17.1, 24.7) | 0.8 (0.4, 1.2) | 6.5 (5.2, 7.7)    |
| Gabon   | Both  | Overall           | 0.653  | 2.5 (0.7, 4.3) | 25 (23, 27) | 22 (15, 30)      | 123 (107, 138)    | 2 (2, 3)          | 147 (128, 168)    | 34 (23, 46)    | 188 (163, 210) | 4 (3, 5)    | 226 (196, 257)  | 1.5 (1.0, 2.0)  | 20.0 (17.4, 22.5) | 1.1 (0.7, 1.4) | 6.7 (5.8, 7.6)    |
| Gambia  | Women | Ages 20 to 44     | 0.139  | 0.9 (0.3, 1.5) | 24 (23, 26) | 1 (0, 1)         | 5 (4, 7)          | 0 (0, 0)          | 6 (4, 7)          | 2 (2, 4)       | 24 (18, 29)    | 0 (0, 0)    | 26 (20, 32)     | 2.0 (1.2, 2.9)  | 18.0 (13.5, 22.3) | 0.4 (0.3, 0.6) | 9.7 (7.4, 11.9)   |
| Gambia  | Women | Ages 45 to 64     | 0.077  | 0.5 (0.1, 0.7) | 26 (24, 28) | 1 (1, 2)         | 6 (4, 8)          | 0 (0, 0)          | 7 (5, 9)          | 14 (8, 20)     | 81 (56, 106)   | 1 (1, 2)    | 96 (68, 123)    | 1.3 (0.8, 1.9)  | 9.3 (6.4, 12.1)   | 0.5 (0.3, 0.7) | 5.1 (3.6, 6.5)    |
| Gambia  | Women | Ages 65 and older | 0.102  | 0.3 (0.1, 0.5) | 25 (22, 27) | 1 (1, 1)         | 6 (4, 8)          | 0 (0, 0)          | 7 (5, 9)          | 56 (37, 78)    | 329 (211, 442) | 2 (1, 4)    | 388 (266, 504)  | 0.6 (0.4, 0.8)  | 5.6 (3.6, 7.5)    | 0.5 (0.3, 0.7) | 2.8 (1.9, 3.6)    |
| Gambia  | Women | Overall           | 0.318  | 0.5 (0.2, 0.9) | 25 (23, 27) | 3 (2, 4)         | 17 (14, 21)       | 0 (0, 0)          | 20 (17, 24)       | 8 (5, 11)      | 55 (45, 65)    | 1 (0, 1)    | 64 (52, 75)     | 0.9 (0.6, 1.3)  | 8.6 (7.0, 10.2)   | 0.5 (0.3, 0.6) | 4.4 (3.6, 5.2)    |
| Gambia  | Men   | Ages 20 to 44     | 0.126  | 0.9 (0.3, 1.6) | 21 (20, 23) | 0 (0, 1)         | 3 (2, 3)          | 0 (0, 0)          | 3 (2, 4)          | 2 (1, 3)       | 13 (9, 16)     | 0 (0, 0)    | 14 (11, 19)     | 1.0 (0.5, 1.5)  | 14.6 (10.1, 19.1) | 0.3 (0.1, 0.5) | 5.2 (3.8, 6.7)    |
| Gambia  | Men   | Ages 45 to 64     | 0.0768 | 0.5 (0.1, 0.8) | 22 (21, 24) | 1 (0, 1)         | 6 (4, 8)          | 0 (0, 0)          | 6 (4, 8)          | 8 (4, 12)      | 75 (50, 100)   | 0 (0, 1)    | 83 (57, 109)    | 0.6 (0.3, 0.8)  | 8.9 (5.9, 11.8)   | 0.3 (0.1, 0.4) | 3.9 (2.6, 5.1)    |
| Gambia  | Men   | Ages 65 and older | 0.0939 | 0.3 (0.1, 0.6) | 22 (20, 23) | 1 (0, 1)         | 5 (3, 7)          | 0 (0, 0)          | 5 (4, 7)          | 28 (14, 43)    | 253 (162, 344) | 1 (0, 2)    | 282 (187, 376)  | 0.3 (0.2, 0.5)  | 5.4 (3.5, 7.4)    | 0.2 (0.1, 0.3) | 2.1 (1.4, 2.9)    |
| Gambia  | Men   | Overall           | 0.296  | 0.6 (0.2, 1.0) | 22 (20, 23) | 1 (1, 2)         | 13 (11, 16)       | 0 (0, 0)          | 15 (12, 18)       | 5 (3, 8)       | 45 (36, 54)    | 0 (0, 0)    | 50 (40, 60)     | 0.5 (0.2, 0.7)  | 7.6 (6.1, 9.3)    | 0.2 (0.1, 0.4) | 3.1 (2.5, 3.7)    |
| Gambia  | Both  | Overall           | 0.614  | 0.6 (0.2, 1.0) | 23 (21, 25) | 4 (3, 5)         | 31 (26, 35)       | 0 (0, 0)          | 35 (30, 40)       | 7 (5, 9)       | 50 (43, 57)    | 0 (0, 1)    | 57 (49, 65)     | 0.7 (0.5, 0.9)  | 8.2 (7.1, 9.3)    | 0.4 (0.3, 0.5) | 3.7 (3.2, 4.3)    |
| Georgia | Women | Ages 20 to 44     | 0.318  | 0.7 (0.2, 1.2) | 25 (22, 29) | 2 (1, 3)         | 3 (2, 3)          | 0 (0, 1)          | 5 (4, 6)          | 3 (2, 4)       | 4 (3, 6)       | 1 (0, 1)    | 8 (6, 11)       | 2.0 (1.2, 2.8)  | 15.9 (11.3, 20.4) | 0.5 (0.3, 0.8) | 2.3 (1.7, 2.9)    |
| Georgia | Women | Ages 45 to 64     | 0.613  | 0.3 (0.1, 0.6) | 28 (24, 32) | 9 (6, 13)        | 13 (9, 17)        | 1 (1, 2)          | 24 (18, 31)       | 15 (9, 22)     | 22 (14, 28)    | 2 (1, 3)    | 39 (29, 50)     | 1.1 (0.7, 1.5)  | 8.1 (5.3, 10.6)   | 0.3 (0.2, 0.5) | 1.6 (1.2, 2.0)    |
| Georgia | Women | Ages 65 and older | 0.068  | 0.2 (0.1, 0.4) | 27 (21, 32) | 39 (22, 57)      | 20 (15, 26)       | 2 (1, 2)          | 61 (42, 82)       | 100 (57, 149)  | 53 (38, 68)    | 4 (2, 6)    | 158 (109, 214)  | 0.6 (0.4, 0.8)  | 4.4 (3.1, 5.7)    | 0.3 (0.2, 0.4) | 0.6 (0.4, 0.8)    |
| Georgia | Women | Overall           | 1.61   | 0.4 (0.1, 0.8) | 27 (22, 31) | 50 (29, 72)      | 36 (29, 44)       | 3 (2, 5)          | 90 (66, 116)      | 31 (18, 44)    | 23 (18, 27)    | 2 (1, 3)    | 56 (41, 72)     | 0.5 (0.3, 0.8)  | 5.6 (4.4, 6.7)    | 0.3 (0.2, 0.5) | 0.8 (0.6, 1.0)    |
| Georgia | Men   | Ages 20 to 44     | 0.298  | 0.8 (0.2, 1.3) | 25 (22, 28) | 10 (6, 14)       | 5 (4, 7)          | 0 (0, 0)          | 15 (11, 20)       | 17 (11, 25)    | 9 (7, 12)      | 0 (0, 1)    | 27 (19, 36)     | 2.1 (1.3, 3.1)  | 16.8 (12.3, 21.3) | 0.3 (0.2, 0.5) | 2.7 (1.9, 3.6)    |
| Georgia | Men   | Ages 45 to 64     | 0.511  | 0.4 (0.1, 0.6) | 27 (24, 29) | 32 (19, 45)      | 20 (14, 27)       | 1 (1, 2)          | 54 (38, 70)       | 63 (38, 89)    | 40 (28, 52)    | 2 (1, 3)    | 105 (74, 136)   | 1.1 (0.7, 1.6)  | 8.7 (6.1, 11.3)   | 0.2 (0.1, 0.4) | 1.6 (1.1, 2.0)    |
| Georgia | Men   | Ages 65 and older | 0.504  | 0.3 (0.1, 0.5) | 25 (22, 29) | 41 (26, 58)      | 22 (15, 30)       | 1 (1, 2)          | 65 (47, 84)       | 173 (110, 243) | 92 (65, 123)   | 5 (3, 7)    | 270 (197, 350)  | 0.5 (0.3, 0.7)  | 4.8 (3.4, 6.5)    | 0.2 (0.1, 0.3) | 0.7 (0.5, 0.9)    |
| Georgia | Men   | Overall           | 1.07   | 0.5 (0.1, 0.8) | 25 (23, 28) | 83 (52, 116)     | 48 (38, 57)       | 3 (2, 4)          | 134 (98, 171)     | 63 (40, 89)    | 36 (29, 44)    | 2 (1, 3)    | 102 (75, 130)   | 0.7 (0.4, 1.0)  | 6.6 (5.3, 8.0)    | 0.2 (0.1, 0.3) | 1.0 (0.7, 1.2)    |
| Georgia | Both  | Overall           | 2.92   | 0.5 (0.1, 0.8) | 26 (22, 30) | 133 (83, 185)    | 84 (72, 96)       | 4 (4, 8)          | 223 (166, 282)    | 46 (28, 63)    | 29 (25, 33)    | 2 (1, 3)    | 76 (57, 96)     | 0.6 (0.4, 0.9)  | 6.2 (5.3, 7.0)    | 0.3 (0.2, 0.4) | 0.9 (0.7, 1.1)    |
| Germany | Women | Ages 20 to 44     | 4.89   | 0.7 (0.5, 0.8) | 24 (23, 25) | 5 (3, 7)         | 15 (10, 19)       | 3 (2, 5)          | 23 (17, 29)       | 0 (0, 1)       | 1 (1, 2)       | 0 (0, 0)    | 2 (2, 3)        | 1.6 (1.0, 2.3)  | 14.0 (9.6, 18.3)  | 0.3 (0.2, 0.5) | 1.6 (1.2, 2.0)    |
| Germany | Women | Ages 45 to 64     | 11.7   | 0.3 (0.2, 0.4) | 28 (26, 29) | 40 (24, 58)      | 80 (54, 107)      | 29 (17, 42)       | 149 (107, 192)    | 3 (2, 5)       | 7 (5, 9)       | 2 (1, 4)    | 13 (9, 16)      | 1.0 (0.6, 1.4)  | 7.6 (5.2, 10.2)   | 0.3 (0.2, 0.5) | 1.0 (0.7, 1.2)    |
| Germany | Women | Ages 65 and older | 15.5   | 0.2 (0.2, 0.3) | 28 (27, 30) | 506 (263, 795)   | 645 (479, 815)    | 116 (66, 170)     | 1267 (921, 1666)  | 53 (27, 83)    | 67 (50, 85)    | 12 (7, 18)  | 132 (96, 173)   | 0.4 (0.2, 0.6)  | 2.8 (2.1, 3.6)    | 0.3 (0.2, 0.4) | 0.6 (0.4, 0.8)    |
| Germany | Women | Overall           | 32.2   | 0.4 (0.3, 0.5) | 27 (25, 28) | 740 (567, 916)   | 148 (85, 217)     | 1439 (1068, 1851) | 17 (9, 27)        | 23 (18, 29)    | 5 (3, 7)       | 45 (33, 58) | 0.4 (0.2, 0.6)  | 3.1 (2.4, 3.8)  | 0.3 (0.2, 0.4)    | 0.6 (0.5, 0.8) |                   |
| Germany | Men   | Ages 20 to 44     | 4.96   | 0.8 (0.6, 0.9) | 26 (25, 27) | 23 (14, 33)      | 48 (32, 63)       | 3 (2, 5)          | 74 (55, 93)       | 2 (1, 3)       | 4 (3, 6)       | 0 (0, 0)    | 7 (5, 8)        | 1.9 (1.1, 2.7)  | 15.2 (10.0, 19.4) | 0.4 (0.2, 0.6) | 3.6 (2.7, 4.6)    |
| Germany | Men   | Ages 45 to 64     | 11.8   | 0.3 (0.2, 0.4) | 29 (28, 30) | 152 (90, 214)    | 221 (149, 291)    | 40 (23, 57)       | 413 (306, 529)    | 13 (8, 18)     | 19 (13, 25)    | 3 (2, 5)    | 35 (26, 45)     | 1.0 (0.6, 1.4)  | 7.9 (5.3, 10.9)   | 0.3 (0.2, 0.5) | 1.5 (1.1, 1.9)    |
| Germany | Men   | Ages 65 and older | 13.3   | 0.2 (0.2, 0.3) | 28 (27, 29) | 470 (277, 682)   | 545 (401, 692)    | 97 (58, 139)      | 1113 (803, 1420)  | 66 (39, 95)    | 76 (56, 97)    | 14 (8, 19)  | 155 (112, 198)  | 0.4 (0.3, 0.6)  | 3.7 (2.8, 4.7)    | 0.2 (0.1, 0.3) | 0.7 (0.5, 0.9)    |
| Germany | Men   | Overall           | 30     | 0.5 (0.4, 0.6) | 27 (27, 28) | 645 (376, 915)   | 814 (640, 974)    | 140 (84, 197)     | 1599 (1209, 1994) | 22 (13, 31)    | 27 (21, 32)    | 5 (3, 7)    | 53 (40, 67)     | 0.5 (0.3, 0.8)  | 4.6 (3.6, 5.5)    | 0.2 (0.1, 0.3) | 0.9 (0.7, 1.1)    |
| Germany | Both  | Overall           | 62     | 0.4 (0.3, 0.5) | 27 (26, 28) | 1196 (698, 1753) | 1554 (1314, 1798) | 88 (167, 414)     | 3039 (2320, 3774) | 19 (11, 28)    | 25 (21, 29)    | 5 (3, 7)    | 49 (37, 61)     | 0.4 (0.3, 0.7)  | 3.7 (3.2, 4.3)    | 0.3 (0.2, 0.4) | 0.7 (0.6, 0.9)    |
| Ghana   | Women | Ages 20 to 44     | 1.83   | 1.0 (0.3, 1.7) | 24 (23, 25) | 9 (6, 14)        | 63 (46, 78)       | 1 (1, 2)          | 73 (55, 90)       | 3 (2, 4)       | 20 (15, 25)    | 0 (0, 1)    | 23 (18, 29)     | 2.3 (1.4, 3.3)  | 19.4 (14.3, 24.3) | 0.5 (0.3, 0.7) | 8.2 (6.2, 10.1)   |
| Ghana   | Women | Ages 45 to 64     | 1.42   | 0.5 (0.1, 0.8) | 25 (24, 26) | 27 (15, 38)      | 100 (70, 129)     | 3 (2, 4)          | 129 (96, 163)     | 19 (11, 27)    | 71 (49, 91)    | 2 (1, 3)    | 91 (68, 115)    | 1.4 (0.8, 2.0)  | 10.3 (7.2, 13.2)  | 0.4 (0.3, 0.6) | 4.0 (2.9, 5.0)    |
| Ghana   | Women | Ages 65 and older | 1.77   | 0.4 (0.1, 0.6) | 23 (23, 24) | 9 (9, 28)        | 99 (64, 133)      | 1 (0, 1)          | 119 (81, 155)     | 38 (19, 58)    | 205 (131, 274) | 2 (1, 3)    | 245 (166, 319)  | 0.3 (0.1, 0.4)  | 5.0 (3.2, 6.7)    | 0.2 (0.1, 0.3) | 1.4 (0.9, 1.8)    |
| Ghana   | Women | Overall           | 5.02   | 0.6 (0.2, 1.1) | 24 (23, 25) | 54 (36, 74)      | 262 (209, 314)    | 5 (3, 6)          | 321 (263, 381)    | 1 (7, 15)      | 52 (42, 63)    | 1 (1, 1)    | 64 (52, 76)     | 0.6 (0.4, 0.9)  | 8.0 (6.4, 9.6)    | 0.4 (0.2, 0.5) | 2.5 (2.1, 3.0)    |
| Ghana   | Men   | Ages 20 to 44     | 1.9    | 1.1 (0.3, 1.9) | 23 (22, 23) | 11 (6, 16)       | 67 (50, 84)       | 0 (0, 1)          | 78 (59, 97)       | 3 (2, 5)       | 21 (15, 26)    | 0 (0, 0)    | 24 (18, 30)     | 1.4 (0.8, 2.2)  | 20.6 (15.3, 25.8) | 0.2 (0.1, 0.3) | 7.1 (5.3, 8.8)    |
| Ghana   | Men   | Ages 45 to 64     | 1.42   | 0.5 (0.1, 0.9) | 23 (23, 24) | 15 (8, 23)       | 133 (88, 174)     | 1 (0, 1)          | 148 (101, 192)    | 11 (5, 16)     | 93 (62, 122)   | 0 (0, 1)    | 104 (71, 135)   | 0.6 (0.3, 0.9)  | 9.8 (6.5, 12.8)   | 0.2 (0.1, 0.3) | 4.0 (2.8, 5.2)    |
| Ghana   | Men   | Ages 65 and older | 1.78   | 0.4 (0.1, 0.7) | 22 (22, 23) | 15 (8, 23)       | 126 (82, 168)     | 1 (0, 1)          | 142 (97, 186)     | 33 (17, 51)    | 283 (185, 377) | 2 (1, 3)    | 318 (217, 417)  | 0.3 (0.1, 0.5)  | 5.7 (3.7, 7.6)    | 0.2 (0.1, 0.3) | 2.0 (1.4, 2.6)    |
| Ghana   | Men   | Overall           | 5.1    | 0.7 (0.2, 1.2) | 23 (22, 23) | 41 (21, 62)      | 326 (260, 392)    | 2 (1, 3)          | 369 (295, 440)    | 8 (4, 12)      | 64 (51, 77)    | 0 (0, 1)    | 72 (58, 86)     | 0.5 (0.3, 0.8)  | 8.4 (6.7, 10.1)   | 0.2 (0.1, 0.3) | 3.1 (2.5, 3.7)    |
| Ghana   | Both  | Overall           | 10.1   | 0.7 (0.2, 1.1) | 23 (23, 24) | 95 (62, 130)     | 588 (507, 668)    | 7 (4, 9)          | 690 (590, 789)    | 9 (6, 13)      | 58 (50, 66)    | 1 (0, 1)    | 68 (58, 78)     | 0.6 (0.4, 0.8)  | 8.2 (7.1, 9.3)    | 0.3 (0.2, 0.4) | 2.8 (2.4, 3.2)    |
| Greece  | Women | Ages 20 to 44     | 0.81   | 0.4 (0.3, 0.4) | 23 (21, 25) | 1 (0, 1)         | 1 (1, 1)          | 0 (0, 0)          | 2 (1, 2)          | 0 (0, 0)       | 1 (0, 1)       | 0 (0, 0)    | 1 (1, 1)        | 0.6 (0.3, 0.9)  | 9.7 (6.5, 12.9)   | 0.1 (0.1, 0.2) | 0.7 (0.5, 0.9)    |
| Greece  | Women | Ages 45 to 64     | 1.49   | 0.2 (0.1, 0.2) | 27 (25, 29) | 5 (3, 7)         | 7 (4, 9)          | 2 (1, 3)          | 14 (10, 18)       | 3 (2, 5)       | 5 (3, 6)       | 1 (1, 2)    | 10 (7, 12)      | 0.8 (0.5, 1.1)  | 5.9 (3.8, 8.0)    | 0.2 (0.1, 0.3) | 0.8 (0.5, 1.0)    |
| Greece  | Women | Ages 65 and older | 2.06   | 0.1 (0.1, 0.2) | 27 (26, 29) | 57 (29, 91)      | 44 (32, 55)       | 10 (6, 14)        | 111 (77, 153)     | 48 (25, 76)    | 37 (27, 46)    | 8 (5, 12)   | 93 (65, 129)    | 0.3 (0.1, 0.4)  | 2.5 (1.8, 3.1)    | 0.2 (0.1, 0.3) | 0.4 (0.3, 0.5)    |
| Greece  | Women | Overall           | 4.36   | 0.2 (0.2, 0.3) | 26 (24, 27) | 63 (33, 98)      | 52 (40, 64)       | 12 (7, 17)        | 127 (91, 171)     | 14 (8, 22)     | 12 (9, 15)     | 3 (2, 4)    | 29 (21, 39)     | 0.3 (0.1, 0.4)  | 2.7 (2.1, 3.3)    | 0.2 (0.1, 0.3) | 0.4 (0.3, 0.5)    |
| Greece  | Men   | Ages 20 to 44     | 0.884  | 0.4 (0.3, 0.5) | 25 (24, 27) | 6 (3, 8)         | 2 (1, 3)          | 0 (0, 0)          | 8 (5, 11)         | 3 (2, 4)       | 1 (1, 2)       | 0 (0, 0)    | 4 (3, 6)        | 1.4 (0.8, 1.9)  | 11.1 (7.2, 14.8)  | 0.2 (0.1, 0.4) | 1.5 (1.0, 2.0)    |
| Greece  | Men   | Ages 45 to 64     | 1.44   | 0.2 (0.1, 0.2) | 28 (26, 29) | 21 (13, 29)      | 11 (8, 15)        | 2 (1, 3)          | 34 (24, 45)       | 14 (9, 21)     | 8 (5, 11)      | 1 (1        |                 |                 |                   |                |                   |

|               |       |                   |        |                |             |               |                |             |                |                |                 |            |                   |                |                   |                |                   |
|---------------|-------|-------------------|--------|----------------|-------------|---------------|----------------|-------------|----------------|----------------|-----------------|------------|-------------------|----------------|-------------------|----------------|-------------------|
| Guatemala     | Both  | Overall           | 5.51   | 0.7 (0.2, 1.3) | 26 (24, 27) | 68 (44, 92)   | 709 (612, 802) | 8 (5, 10)   | 784 (678, 883) | 12 (8, 17)     | 129 (111, 146)  | 1 (1, 2)   | 142 (123, 160)    | 0.8 (0.5, 1.1) | 9.2 (7.9, 10.4)   | 0.5 (0.3, 0.7) | 5.3 (4.6, 6.0)    |
| Guinea        | Women | Ages 20 to 44     | 0.687  | 0.6 (0.2, 1.0) | 22 (21, 23) | 1 (1, 2)      | 16 (11, 20)    | 0 (0, 0)    | 18 (13, 22)    | 1 (1, 2)       | 14 (10, 18)     | 0 (0, 0)   | 15 (11, 19)       | 0.9 (0.4, 1.4) | 13.4 (9.5, 16.9)  | 0.2 (0.2, 0.3) | 5.8 (4.2, 7.3)    |
| Guinea        | Women | Ages 45 to 64     | 0.534  | 0.3 (0.1, 0.5) | 23 (21, 24) | 3 (2, 5)      | 30 (20, 40)    | 0 (0, 0)    | 34 (23, 44)    | 6 (3, 10)      | 56 (37, 75)     | 1 (0, 1)   | 63 (43, 83)       | 0.5 (0.2, 0.7) | 7.0 (4.6, 9.3)    | 0.2 (0.1, 0.2) | 2.7 (1.8, 3.5)    |
| Guinea        | Women | Ages 65 and older | 0.642  | 0.2 (0.1, 0.3) | 22 (18, 25) | 4 (2, 7)      | 34 (21, 47)    | 0 (0, 0)    | 39 (25, 51)    | 25 (13, 37)    | 185 (116, 256)  | 1 (0, 1)   | 211 (140, 282)    | 0.2 (0.1, 0.3) | 3.6 (2.3, 5.0)    | 0.1 (0.1, 0.2) | 1.2 (0.8, 1.6)    |
| Guinea        | Women | Overall           | 1.86   | 0.4 (0.1, 0.6) | 22 (20, 24) | 9 (5, 14)     | 80 (64, 97)    | 1 (0, 1)    | 90 (72, 108)   | 5 (3, 8)       | 43 (34, 52)     | 0 (0, 0)   | 48 (39, 58)       | 0.3 (0.1, 0.4) | 5.4 (4.3, 6.6)    | 0.2 (0.1, 0.2) | 1.9 (1.5, 2.3)    |
| Guinea        | Men   | Ages 20 to 44     | 0.707  | 0.6 (0.2, 1.1) | 22 (20, 25) | 2 (1, 3)      | 14 (10, 18)    | 0 (0, 0)    | 16 (12, 20)    | 1 (1, 2)       | 12 (9, 15)      | 0 (0, 0)   | 14 (10, 17)       | 0.9 (0.5, 1.4) | 14.6 (10.6, 18.4) | 0.2 (0.1, 0.4) | 5.8 (4.4, 7.3)    |
| Guinea        | Men   | Ages 45 to 64     | 0.523  | 0.3 (0.1, 0.5) | 23 (21, 26) | 3 (1, 4)      | 31 (20, 41)    | 0 (0, 0)    | 34 (23, 44)    | 6 (3, 8)       | 59 (38, 79)     | 0 (0, 0)   | 65 (44, 84)       | 0.4 (0.2, 0.7) | 7.3 (4.7, 9.7)    | 0.1 (0.1, 0.2) | 3.4 (2.2, 4.4)    |
| Guinea        | Men   | Ages 65 and older | 0.626  | 0.2 (0.1, 0.4) | 22 (19, 25) | 3 (2, 5)      | 28 (19, 38)    | 0 (0, 0)    | 31 (22, 41)    | 20 (10, 30)    | 190 (125, 256)  | 1 (0, 1)   | 210 (144, 276)    | 0.2 (0.1, 0.3) | 4.4 (2.9, 5.9)    | 0.1 (0.1, 0.2) | 1.7 (1.2, 2.2)    |
| Guinea        | Men   | Overall           | 1.86   | 0.4 (0.1, 0.7) | 22 (20, 25) | 8 (4, 11)     | 74 (59, 88)    | 0 (0, 1)    | 81 (66, 97)    | 4 (2, 6)       | 40 (32, 48)     | 0 (0, 0)   | 44 (35, 52)       | 0.4 (0.2, 0.5) | 6.3 (5.1, 7.5)    | 0.1 (0.1, 0.2) | 2.6 (2.1, 3.2)    |
| Guinea        | Both  | Overall           | 3.72   | 0.4 (0.1, 0.7) | 22 (20, 25) | 17 (9, 26)    | 154 (132, 176) | 1 (0, 1)    | 171 (148, 197) | 5 (2, 7)       | 41 (36, 47)     | 0 (0, 0)   | 46 (40, 53)       | 0.3 (0.2, 0.5) | 5.8 (5.0, 6.6)    | 0.2 (0.1, 0.2) | 2.2 (1.9, 2.5)    |
| Guinea-Bissau | Women | Ages 20 to 44     | 0.11   | 0.4 (0.1, 0.7) | 22 (19, 26) | 0 (0, 0)      | 3 (2, 3)       | 0 (0, 0)    | 3 (2, 4)       | 1 (1, 2)       | 14 (10, 19)     | 0 (0, 0)   | 16 (12, 20)       | 0.7 (0.3, 1.1) | 10.7 (7.7, 13.8)  | 0.1 (0.1, 0.2) | 4.6 (3.4, 5.9)    |
| Guinea-Bissau | Women | Ages 45 to 64     | 0.0895 | 0.2 (0.0, 0.3) | 24 (20, 27) | 1 (0, 1)      | 5 (4, 7)       | 0 (0, 0)    | 6 (4, 8)       | 6 (3, 10)      | 59 (39, 80)     | 1 (0, 1)   | 66 (45, 87)       | 0.4 (0.2, 0.6) | 5.9 (3.9, 8.0)    | 0.1 (0.1, 0.2) | 2.4 (1.6, 3.2)    |
| Guinea-Bissau | Women | Ages 65 and older | 0.102  | 0.1 (0.0, 0.2) | 23 (17, 28) | 1 (0, 1)      | 5 (3, 8)       | 0 (0, 0)    | 6 (4, 8)       | 26 (13, 40)    | 196 (125, 273)  | 1 (1, 2)   | 224 (148, 301)    | 0.2 (0.1, 0.3) | 3.5 (2.3, 4.9)    | 0.2 (0.1, 0.2) | 1.3 (0.8, 1.7)    |
| Guinea-Bissau | Women | Overall           | 0.301  | 0.2 (0.1, 0.4) | 23 (19, 27) | 2 (1, 2)      | 13 (10, 16)    | 0 (0, 0)    | 15 (12, 18)    | 5 (3, 8)       | 44 (35, 54)     | 0 (0, 0)   | 50 (39, 60)       | 0.3 (0.1, 0.4) | 5.0 (3.9, 6.1)    | 0.1 (0.1, 0.2) | 1.9 (1.5, 2.3)    |
| Guinea-Bissau | Men   | Ages 20 to 44     | 0.109  | 0.4 (0.1, 0.7) | 21 (19, 24) | 0 (0, 0)      | 1 (1, 2)       | 0 (0, 0)    | 2 (1, 2)       | 1 (1, 2)       | 8 (5, 11)       | 0 (0, 0)   | 9 (6, 12)         | 0.6 (0.3, 0.9) | 9.0 (5.9, 12.1)   | 0.2 (0.1, 0.2) | 3.5 (2.4, 4.6)    |
| Guinea-Bissau | Men   | Ages 45 to 64     | 0.0827 | 0.2 (0.1, 0.3) | 22 (19, 25) | 0 (0, 1)      | 5 (3, 7)       | 0 (0, 0)    | 5 (4, 7)       | 6 (3, 9)       | 60 (38, 81)     | 0 (0, 1)   | 66 (45, 88)       | 0.4 (0.2, 0.6) | 6.0 (3.8, 8.1)    | 0.1 (0.1, 0.3) | 2.6 (1.8, 3.5)    |
| Guinea-Bissau | Men   | Ages 65 and older | 0.0951 | 0.1 (0.0, 0.3) | 21 (18, 25) | 0 (0, 1)      | 4 (3, 5)       | 0 (0, 0)    | 4 (3, 6)       | 20 (10, 30)    | 172 (113, 234)  | 1 (1, 2)   | 193 (130, 257)    | 0.2 (0.1, 0.3) | 3.7 (2.5, 5.1)    | 0.1 (0.1, 0.2) | 1.4 (0.9, 1.9)    |
| Guinea-Bissau | Men   | Overall           | 0.286  | 0.3 (0.1, 0.4) | 22 (19, 24) | 1 (1, 2)      | 10 (8, 13)     | 0 (0, 0)    | 12 (9, 14)     | 4 (2, 6)       | 36 (28, 44)     | 0 (0, 0)   | 40 (32, 49)       | 0.3 (0.1, 0.4) | 5.1 (3.9, 6.1)    | 0.1 (0.1, 0.2) | 2.0 (1.6, 2.4)    |
| Guinea-Bissau | Both  | Overall           | 0.587  | 0.3 (0.1, 0.4) | 22 (19, 26) | 3 (1, 4)      | 24 (20, 27)    | 0 (0, 0)    | 27 (22, 31)    | 4 (2, 7)       | 40 (34, 46)     | 0 (0, 0)   | 45 (37, 52)       | 0.3 (0.1, 0.4) | 5.0 (4.2, 5.8)    | 0.1 (0.1, 0.2) | 1.9 (1.6, 2.2)    |
| Guyana        | Women | Ages 20 to 44     | 0.0573 | 1.9 (0.5, 3.2) | 25 (22, 29) | 1 (1, 2)      | 9 (6, 11)      | 0 (0, 0)    | 10 (8, 12)     | 11 (6, 16)     | 81 (59, 102)    | 2 (1, 2)   | 93 (70, 115)      | 4.5 (2.6, 6.8) | 29.5 (21.4, 37.0) | 1.3 (0.7, 1.9) | 16.6 (12.4, 20.5) |
| Guyana        | Women | Ages 45 to 64     | 0.0585 | 0.9 (0.3, 1.6) | 28 (24, 32) | 3 (2, 5)      | 32 (23, 41)    | 0 (0, 0)    | 36 (26, 45)    | 55 (31, 81)    | 548 (395, 695)  | 5 (3, 8)   | 608 (446, 764)    | 2.3 (1.3, 3.4) | 15.8 (11.4, 20.0) | 0.9 (0.5, 1.3) | 11.7 (8.6, 14.8)  |
| Guyana        | Women | Ages 65 and older | 0.0701 | 0.7 (0.2, 1.2) | 26 (21, 32) | 5 (3, 8)      | 28 (19, 36)    | 0 (0, 0)    | 33 (24, 42)    | 278 (157, 399) | 426 (989, 1832) | 17 (9, 24) | 1720 (1233, 2162) | 1.0 (0.6, 1.5) | 8.1 (5.6, 10.3)   | 0.7 (0.4, 1.0) | 4.1 (3.0, 5.2)    |
| Guyana        | Women | Overall           | 0.186  | 1.2 (0.4, 2.1) | 26 (22, 31) | 10 (6, 14)    | 69 (56, 81)    | 1 (0, 1)    | 79 (64, 94)    | 53 (30, 75)    | 369 (300, 436)  | 4 (3, 6)   | 425 (347, 504)    | 1.4 (0.8, 2.0) | 11.9 (9.7, 14.1)  | 0.8 (0.5, 1.2) | 6.8 (5.5, 8.0)    |
| Guyana        | Men   | Ages 20 to 44     | 0.0544 | 2.0 (0.7, 3.4) | 23 (21, 26) | 1 (0, 1)      | 7 (5, 9)       | 0 (0, 0)    | 8 (6, 10)      | 7 (3, 11)      | 46 (46, 88)     | 0 (0, 1)   | 76 (53, 96)       | 2.0 (1.0, 3.2) | 28.3 (19.1, 36.5) | 0.4 (0.2, 0.7) | 13.0 (9.1, 16.5)  |
| Guyana        | Men   | Ages 45 to 64     | 0.0578 | 1.0 (0.3, 1.7) | 24 (22, 27) | 3 (1, 4)      | 28 (19, 36)    | 0 (0, 0)    | 31 (22, 39)    | 46 (23, 70)    | 483 (322, 627)  | 2 (1, 2)   | 531 (372, 679)    | 1.0 (0.5, 1.5) | 14.8 (9.9, 19.2)  | 0.3 (0.1, 0.4) | 7.3 (5.1, 9.3)    |
| Guyana        | Men   | Ages 65 and older | 0.0651 | 0.7 (0.2, 1.2) | 23 (20, 27) | 2 (1, 3)      | 14 (9, 19)     | 0 (0, 0)    | 16 (11, 21)    | 148 (77, 227)  | 087 (721, 1459) | 5 (3, 8)   | 1240 (847, 1636)  | 0.5 (0.3, 0.7) | 7.9 (5.3, 10.6)   | 0.2 (0.1, 0.3) | 2.9 (2.0, 3.8)    |
| Guyana        | Men   | Overall           | 0.177  | 1.3 (0.4, 2.2) | 24 (21, 27) | 5 (3, 8)      | 49 (39, 59)    | 0 (0, 0)    | 55 (44, 66)    | 30 (15, 45)    | 279 (220, 336)  | 1 (1, 2)   | 310 (249, 372)    | 0.8 (0.4, 1.2) | 12.6 (9.9, 15.1)  | 0.2 (0.1, 0.4) | 5.3 (4.3, 6.4)    |
| Guyana        | Both  | Overall           | 0.363  | 1.2 (0.4, 2.1) | 25 (21, 29) | 15 (10, 20)   | 118 (100, 134) | 1 (1, 1)    | 134 (116, 152) | 42 (28, 56)    | 325 (276, 369)  | 3 (2, 4)   | 369 (319, 418)    | 1.1 (0.7, 1.5) | 12.2 (10.3, 13.8) | 0.6 (0.4, 0.9) | 6.1 (5.2, 6.9)    |
| Haiti         | Women | Ages 20 to 44     | 0.814  | 0.9 (0.2, 1.5) | 23 (23, 24) | 5 (3, 8)      | 73 (51, 94)    | 1 (0, 1)    | 79 (56, 101)   | 4 (2, 6)       | 55 (39, 72)     | 1 (0, 1)   | 60 (43, 77)       | 1.2 (0.6, 1.9) | 17.0 (12.0, 22.1) | 0.4 (0.2, 0.6) | 8.2 (5.8, 10.5)   |
| Haiti         | Women | Ages 45 to 64     | 0.651  | 0.4 (0.1, 0.7) | 24 (22, 25) | 11 (5, 17)    | 163 (106, 217) | 1 (1, 2)    | 175 (116, 230) | 17 (8, 27)     | 250 (162, 333)  | 2 (1, 3)   | 269 (177, 353)    | 0.6 (0.3, 1.0) | 8.7 (5.6, 11.5)   | 0.2 (0.1, 0.4) | 4.8 (3.2, 6.3)    |
| Haiti         | Women | Ages 65 and older | 0.745  | 0.3 (0.1, 0.6) | 21 (18, 25) | 13 (6, 19)    | 171 (110, 234) | 1 (1, 2)    | 185 (125, 248) | 52 (27, 80)    | 711 (457, 969)  | 5 (2, 7)   | 768 (517, 1027)   | 0.3 (0.1, 0.4) | 4.3 (2.8, 5.9)    | 0.1 (0.1, 0.2) | 2.2 (1.5, 3.0)    |
| Haiti         | Women | Overall           | 2.21   | 0.6 (0.2, 1.0) | 23 (21, 25) | 29 (15, 45)   | 407 (320, 494) | 3 (2, 5)    | 439 (351, 529) | 13 (7, 20)     | 184 (145, 224)  | 1 (1, 2)   | 199 (159, 239)    | 0.4 (0.2, 0.6) | 6.5 (5.1, 7.9)    | 0.2 (0.1, 0.3) | 3.4 (2.7, 4.1)    |
| Haiti         | Men   | Ages 20 to 44     | 0.785  | 1.0 (0.3, 1.7) | 23 (21, 26) | 4 (2, 6)      | 46 (34, 59)    | 0 (0, 0)    | 50 (38, 63)    | 3 (2, 5)       | 36 (27, 46)     | 0 (0, 0)   | 40 (30, 50)       | 1.3 (0.7, 2.1) | 18.1 (13.3, 23.0) | 0.2 (0.1, 0.3) | 9.4 (7.1, 11.8)   |
| Haiti         | Men   | Ages 45 to 64     | 0.61   | 0.5 (0.1, 0.8) | 24 (22, 27) | 10 (5, 16)    | 111 (72, 147)  | 1 (0, 1)    | 122 (81, 158)  | 17 (8, 26)     | 381 (118, 240)  | 1 (0, 2)   | 199 (133, 259)    | 0.6 (0.3, 1.0) | 9.3 (6.3, 12.3)   | 0.1 (0.1, 0.2) | 4.3 (2.9, 5.6)    |
| Haiti         | Men   | Ages 65 and older | 0.682  | 0.3 (0.1, 0.6) | 23 (20, 27) | 10 (5, 15)    | 90 (58, 124)   | 1 (0, 1)    | 101 (67, 135)  | 50 (25, 77)    | 455 (291, 626)  | 3 (2, 5)   | 508 (337, 682)    | 0.3 (0.2, 0.5) | 5.1 (3.3, 7.0)    | 0.1 (0.0, 0.2) | 2.1 (1.4, 2.8)    |
| Haiti         | Men   | Overall           | 2.08   | 0.6 (0.2, 1.0) | 24 (21, 27) | 24 (12, 36)   | 247 (199, 299) | 1 (1, 2)    | 273 (218, 328) | 12 (6, 17)     | 119 (96, 144)   | 1 (0, 1)   | 131 (105, 158)    | 0.5 (0.2, 0.7) | 7.7 (6.2, 9.3)    | 0.1 (0.1, 0.2) | 3.4 (2.7, 4.0)    |
| Haiti         | Both  | Overall           | 4.29   | 0.6 (0.2, 1.0) | 23 (21, 26) | 53 (27, 80)   | 654 (552, 754) | 5 (2, 7)    | 712 (600, 824) | 12 (6, 19)     | 153 (129, 176)  | 1 (1, 2)   | 166 (140, 192)    | 0.4 (0.2, 0.7) | 6.9 (5.8, 8.0)    | 0.2 (0.1, 0.3) | 3.4 (2.8, 3.9)    |
| Honduras      | Women | Ages 20 to 44     | 0.602  | 2.5 (0.6, 4.3) | 26 (25, 27) | 15 (10, 21)   | 20 (15, 24)    | 1 (1, 1)    | 36 (28, 45)    | 15 (9, 21)     | 19 (15, 23)     | 1 (1, 1)   | 35 (27, 44)       | 5.9 (3.7, 8.2) | 37.4 (28.4, 45.2) | 2.0 (1.1, 2.9) | 9.7 (7.5, 12.2)   |
| Honduras      | Women | Ages 45 to 64     | 0.446  | 1.3 (0.4, 2.3) | 28 (27, 29) | 23 (14, 33)   | 59 (41, 76)    | 2 (1, 4)    | 85 (62, 105)   | 52 (31, 73)    | 133 (91, 171)   | 5 (3, 9)   | 190 (139, 236)    | 2.9 (1.7, 4.1) | 19.9 (13.6, 25.5) | 1.6 (0.8, 2.5) | 7.0 (5.1, 8.6)    |
| Honduras      | Women | Ages 65 and older | 0.583  | 0.9 (0.3, 1.6) | 25 (23, 27) | 26 (18, 36)   | 65 (48, 83)    | 2 (1, 3)    | 93 (74, 114)   | 149 (102, 204) | 371 (275, 473)  | 11 (6, 17) | 532 (422, 655)    | 0.7 (0.5, 1.0) | 8.7 (6.4, 11.1)   | 0.9 (0.5, 1.4) | 2.0 (1.6, 2.4)    |
| Honduras      | Women | Overall           | 1.63   | 1.6 (0.4, 2.8) | 26 (25, 28) | 64 (42, 87)   | 144 (118, 169) | 5 (3, 8)    | 213 (174, 252) | 39 (25, 53)    | 88 (72, 103)    | 3 (2, 5)   | 311 (107, 155)    | 1.3 (0.9, 1.8) | 13.1 (10.8, 15.4) | 1.3 (0.8, 1.9) | 3.4 (2.8, 4.0)    |
| Honduras      | Men   | Ages 20 to 44     | 0.583  | 2.6 (0.7, 4.5) | 25 (23, 26) | 11 (7, 16)    | 13 (10, 15)    | 0 (0, 0)    | 24 (19, 30)    | 11 (7, 16)     | 13 (10, 16)     | 0 (0, 0)   | 25 (19, 31)       | 6.1 (3.8, 8.7) | 38.9 (29.9, 46.4) | 1.1 (0.6, 1.7) | 10.4 (8.0, 12.9)  |
| Honduras      | Men   | Ages 45 to 64     | 0.439  | 1.4 (0.4, 2.4) | 26 (24, 28) | 27 (17, 38)   | 43 (31, 54)    | 1 (0, 1)    | 71 (54, 89)    | 62 (38, 87)    | 97 (70, 124)    | 2 (1, 3)   | 161 (122, 202)    | 2.9 (1.8, 4.1) | 20.8 (15.0, 26.3) | 1.0 (0.5, 1.6) | 5.9 (4.4, 7.3)    |
| Honduras      | Men   | Ages 65 and older | 0.536  | 1.0 (0.3, 1.7) | 24 (22, 26) | 17 (8, 25)    | 49 (34, 64)    | 0 (0, 1)    | 66 (48, 84)    | 109 (55, 166)  | 318 (219, 415)  | 3 (1, 5)   | 429 (313, 547)    | 0.5 (0.3, 0.8) | 9.3 (6.4, 12.2)   | 0.3 (0.1, 0.5) | 1.7 (1.2, 2.1)    |
| Honduras      | Men   | Overall           | 1.56   | 1.7 (0.5, 2.9) | 25 (23, 27) | 55 (38, 73)   | 104 (84, 124)  | 1 (1, 2)    | 160 (131, 189) | 35 (24, 47)    | 67 (54, 79)     | 1 (1, 1)   | 103 (84, 121)     | 1.3 (0.9, 1.7) | 13.7 (11.0, 16.3) | 0.6 (0.3, 0.8) | 3.0 (2.4, 3.5)    |
| Honduras      | Both  | Overall           | 3.19   | 1.7 (0.5, 2.9) | 25 (24, 27) | 119 (79, 159) | 248 (213, 279) | 7 (4, 10)   | 374 (314, 433) | 37 (25, 50)    | 78 (67, 87)     | 2 (1, 3)   | 117 (98, 136)     | 1.3 (0.9, 1.8) | 13.4 (11.5, 15.0) | 1.0 (0.7, 1.5) | 3.2 (2.7, 3.7)    |
| Hungary       | Women | Ages 20 to 44     | 0.748  | 0.4 (0.3, 0.5) | 24 (22, 26) | 1 (1, 2)      | 3 (2, 4)       | 0 (0, 1)    | 5 (3, 6)       | 1 (1, 1)       | 2 (1, 2)        | 0 (0, 0)   | 3 (2, 4)          | 1.2 (0.7, 1.8) | 10.4 (7.0, 13.8)  | 0.3 (0.2, 0.4) | 1.4 (1.0, 1.8)    |
| Hungary       | Women | Ages 45 to 64     | 1.4    | 0.2 (0.1, 0.2) | 28 (25, 31) | 16 (9, 22)    | 22 (15, 30)    | 4 (2, 6)    | 42 (30, 55)    | 11 (7, 16)     | 16 (11, 21)     | 3 (2, 5)   | 30 (21, 39)       | 0.8 (0.5, 1.2) | 6.1 (4.2, 8.2)    | 0.3 (0.1, 0.4) | 1.0 (0.7, 1.4)    |
| Hungary       | Women | Ages 65 and older | 1.78   | 0.1 (0.1, 0.2) | 29 (26, 32) | 97 (53, 145)  | 79 (57, 100)   | 12 (7, 18)  | 188 (132, 246) | 91 (50, 137)   | 75 (54, 94)     | 11 (6, 17) | 177 (125, 232)    | 0.3 (0.2, 0.5) | 3.0 (2.2, 3.7)    | 0.2 (0.1, 0.4) | 0.5 (0.3, 0.6)    |
| Hungary       | Women | Overall           | 3.93   | 0.2 (0.2, 0.3) | 27 (24, 29) | 114 (64, 168) | 104 (82, 128)  | 16 (10, 25) | 235 (171, 304) | 29 (16, 43)    | 27 (21, 33)     | 4 (2, 6)   | 60 (43, 77)       | 0.4 (0.2, 0.5) | 3.4 (2.7, 4.2)    | 0.2 (0.1, 0.4) | 0.5 (0.4, 0.7)    |
| Hungary       | Men   | Ages 20 to 44     | 0.779  |                |             |               |                |             |                |                |                 |            |                   |                |                   |                |                   |

|                            |       |                   |       |                |             |                  |                    |               |                    |               |                |            |                |                |                   |                |                 |
|----------------------------|-------|-------------------|-------|----------------|-------------|------------------|--------------------|---------------|--------------------|---------------|----------------|------------|----------------|----------------|-------------------|----------------|-----------------|
| India                      | Men   | Ages 45 to 64     | 102   | 0.2 (0.1, 0.4) | 21 (21, 22) | 514 (259, 776)   | 2169 (1121, 3186)  | 47 (23, 78)   | 2731 (1650, 3773)  | 5 (3, 8)      | 21 (11, 31)    | 0 (0, 1)   | 27 (16, 37)    | 0.2 (0.1, 0.3) | 2.6 (1.3, 3.8)    | 0.1 (0.1, 0.2) | 0.6 (0.4, 0.9)  |
| India                      | Men   | Ages 65 and older | 109   | 0.2 (0.0, 0.3) | 20 (20, 21) | 0 (0, 0)         | 0 (0, 0)           | 0 (0, 0)      | 0 (0, 0)           | 0 (0, 0)      | 0 (0, 0)       | 0 (0, 0)   | 0 (0, 0)       | 0.0 (0.0, 0.0) | 0.0 (0.0, 0.0)    | 0.0 (0.0, 0.0) | 0.0 (0.0, 0.0)  |
| India                      | Men   | Overall           | 315   | 0.3 (0.1, 0.5) | 21 (20, 21) | 810 (414, 1237)  | 3345 (2270, 4426)  | 62 (32, 100)  | 4217 (3022, 5418)  | 3 (1, 4)      | 11 (7, 14)     | 0 (0, 0)   | 13 (10, 17)    | 0.1 (0.0, 0.1) | 1.4 (1.0, 1.9)    | 0.1 (0.0, 0.1) | 0.4 (0.3, 0.5)  |
| India                      | Both  | Overall           | 615   | 0.3 (0.1, 0.5) | 21 (20, 21) | 1496 (768, 2233) | 7974 (6266, 9752)  | 187 (98, 284) | 9657 (7569, 11743) | 2 (1, 4)      | 13 (10, 16)    | 0 (0, 0)   | 16 (12, 19)    | 0.1 (0.1, 0.1) | 1.8 (1.4, 2.2)    | 0.1 (0.0, 0.1) | 0.5 (0.4, 0.6)  |
| Indonesia                  | Women | Ages 20 to 44     | 21    | 0.7 (0.2, 1.2) | 23 (22, 24) | 36 (17, 59)      | 843 (574, 1113)    | 7 (3, 10)     | 886 (616, 1160)    | 1 (0, 2)      | 22 (15, 29)    | 0 (0, 0)   | 23 (16, 30)    | 1.0 (0.5, 1.7) | 14.3 (9.7, 18.9)  | 0.2 (0.1, 0.3) | 8.3 (5.8, 10.9) |
| Indonesia                  | Women | Ages 45 to 64     | 20.7  | 0.4 (0.1, 0.6) | 23 (22, 25) | 120 (59, 188)    | 2849 (1885, 3798)  | 23 (11, 36)   | 2992 (2030, 3975)  | 6 (3, 9)      | 137 (91, 183)  | 1 (1, 2)   | 144 (98, 192)  | 0.6 (0.3, 0.9) | 8.0 (5.3, 10.6)   | 0.2 (0.1, 0.3) | 5.1 (3.5, 6.8)  |
| Indonesia                  | Women | Ages 65 and older | 25.4  | 0.3 (0.1, 0.4) | 21 (20, 22) | 136 (69, 205)    | 2151 (1186, 3131)  | 13 (7, 21)    | 2300 (1323, 3274)  | 18 (9, 28)    | 289 (159, 420) | 2 (1, 3)   | 309 (178, 439) | 0.1 (0.1, 0.2) | 2.7 (1.5, 4.0)    | 0.1 (0.0, 0.1) | 1.3 (0.7, 1.8)  |
| Indonesia                  | Women | Overall           | 67.1  | 0.4 (0.1, 0.8) | 22 (21, 23) | 291 (146, 436)   | 5843 (4404, 7207)  | 43 (21, 65)   | 6178 (4765, 7600)  | 4 (2, 6)      | 87 (66, 107)   | 1 (0, 1)   | 92 (71, 113)   | 0.2 (0.1, 0.3) | 4.8 (3.7, 6.0)    | 0.1 (0.1, 0.2) | 2.5 (1.9, 3.0)  |
| Indonesia                  | Men   | Ages 20 to 44     | 20.8  | 0.7 (0.2, 1.2) | 22 (21, 23) | 75 (38, 117)     | 853 (571, 1133)    | 4 (2, 6)      | 932 (641, 1219)    | 2 (1, 3)      | 22 (15, 29)    | 0 (0, 0)   | 24 (17, 32)    | 0.9 (0.5, 1.4) | 13.6 (9.1, 18.1)  | 0.2 (0.1, 0.3) | 6.7 (4.6, 8.8)  |
| Indonesia                  | Men   | Ages 45 to 64     | 20.4  | 0.4 (0.1, 0.6) | 22 (21, 23) | 223 (112, 347)   | 2078 (1389, 2752)  | 16 (8, 24)    | 2317 (1627, 3017)  | 11 (6, 17)    | 102 (68, 135)  | 1 (0, 1)   | 114 (80, 148)  | 0.5 (0.3, 0.8) | 8.3 (5.5, 11.0)   | 0.2 (0.1, 0.3) | 3.5 (2.5, 4.6)  |
| Indonesia                  | Men   | Ages 65 and older | 23.5  | 0.3 (0.1, 0.5) | 20 (19, 21) | 0 (0, 0)         | 0 (0, 0)           | 0 (0, 0)      | 0 (0, 0)           | 0 (0, 0)      | 0 (0, 0)       | 0 (0, 0)   | 0 (0, 0)       | 0.0 (0.0, 0.0) | 0.0 (0.0, 0.0)    | 0.0 (0.0, 0.0) | 0.0 (0.0, 0.0)  |
| Indonesia                  | Men   | Overall           | 64.7  | 0.5 (0.2, 0.8) | 21 (21, 22) | 298 (153, 460)   | 2931 (2192, 3636)  | 20 (10, 30)   | 3249 (2503, 3980)  | 5 (2, 7)      | 45 (34, 56)    | 0 (0, 0)   | 50 (39, 61)    | 0.2 (0.1, 0.3) | 4.2 (3.2, 5.3)    | 0.1 (0.0, 0.1) | 1.5 (1.2, 1.9)  |
| Indonesia                  | Both  | Overall           | 132   | 0.5 (0.1, 0.8) | 22 (21, 23) | 590 (305, 887)   | 8774 (7212, 10392) | 63 (31, 95)   | 9427 (7827, 11104) | 4 (2, 7)      | 67 (55, 79)    | 0 (0, 1)   | 71 (59, 84)    | 0.2 (0.1, 0.3) | 4.6 (3.8, 5.5)    | 0.1 (0.1, 0.2) | 2.1 (1.7, 2.4)  |
| Iran (Islamic Republic of) | Women | Ages 20 to 44     | 7.8   | 0.2 (0.2, 0.3) | 26 (26, 27) | 18 (11, 25)      | 34 (23, 45)        | 2 (1, 3)      | 54 (40, 68)        | 1 (1, 2)      | 3 (2, 4)       | 0 (0, 0)   | 4 (3, 5)       | 1.1 (0.7, 1.6) | 8.8 (6.1, 11.7)   | 0.3 (0.2, 0.4) | 1.9 (1.4, 2.4)  |
| Iran (Islamic Republic of) | Women | Ages 45 to 64     | 5.69  | 0.1 (0.1, 0.1) | 29 (28, 30) | 60 (36, 86)      | 102 (69, 138)      | 6 (4, 9)      | 168 (122, 213)     | 10 (6, 15)    | 18 (12, 24)    | 1 (1, 2)   | 29 (21, 37)    | 0.7 (0.4, 1.1) | 5.6 (3.8, 7.6)    | 0.3 (0.2, 0.5) | 1.4 (1.0, 1.8)  |
| Iran (Islamic Republic of) | Women | Ages 65 and older | 6.66  | 0.1 (0.1, 0.1) | 28 (27, 29) | 128 (73, 191)    | 137 (100, 172)     | 7 (4, 10)     | 271 (200, 353)     | 69 (39, 102)  | 74 (54, 92)    | 4 (2, 5)   | 146 (108, 190) | 0.4 (0.2, 0.5) | 2.9 (2.1, 3.6)    | 0.4 (0.2, 0.6) | 0.6 (0.5, 0.8)  |
| Iran (Islamic Republic of) | Women | Overall           | 20.2  | 0.1 (0.1, 0.2) | 27 (27, 28) | 205 (122, 296)   | 272 (225, 323)     | 15 (9, 22)    | 493 (376, 609)     | 10 (6, 15)    | 14 (11, 16)    | 1 (0, 1)   | 24 (19, 30)    | 0.5 (0.3, 0.7) | 3.9 (3.3, 4.7)    | 0.3 (0.2, 0.5) | 0.8 (0.6, 1.0)  |
| Iran (Islamic Republic of) | Men   | Ages 20 to 44     | 7.85  | 0.2 (0.2, 0.3) | 25 (24, 25) | 39 (24, 56)      | 38 (27, 49)        | 1 (1, 2)      | 78 (58, 101)       | 3 (2, 4)      | 3 (2, 4)       | 0 (0, 0)   | 6 (5, 8)       | 1.1 (0.7, 1.6) | 9.1 (6.6, 11.8)   | 0.3 (0.2, 0.5) | 1.8 (1.3, 2.3)  |
| Iran (Islamic Republic of) | Men   | Ages 45 to 64     | 5.72  | 0.1 (0.1, 0.1) | 26 (25, 27) | 128 (76, 183)    | 115 (79, 149)      | 6 (3, 8)      | 248 (179, 317)     | 22 (13, 32)   | 20 (14, 26)    | 1 (1, 1)   | 43 (31, 55)    | 0.7 (0.4, 1.0) | 5.6 (3.9, 7.3)    | 0.4 (0.2, 0.6) | 1.2 (0.8, 1.5)  |
| Iran (Islamic Republic of) | Men   | Ages 65 and older | 7.02  | 0.1 (0.1, 0.1) | 25 (24, 26) | 140 (95, 191)    | 158 (112, 202)     | 8 (5, 10)     | 305 (232, 376)     | 70 (47, 95)   | 78 (56, 100)   | 4 (3, 5)   | 152 (116, 187) | 0.3 (0.2, 0.3) | 2.8 (2.0, 3.6)    | 0.3 (0.2, 0.4) | 0.5 (0.4, 0.6)  |
| Iran (Islamic Republic of) | Men   | Overall           | 20.6  | 0.1 (0.1, 0.2) | 25 (25, 26) | 307 (199, 424)   | 310 (250, 363)     | 15 (10, 20)   | 631 (492, 772)     | 15 (10, 21)   | 15 (12, 18)    | 1 (0, 1)   | 31 (24, 37)    | 0.4 (0.3, 0.6) | 3.8 (3.1, 4.5)    | 0.3 (0.2, 0.5) | 0.7 (0.5, 0.8)  |
| Iran (Islamic Republic of) | Both  | Overall           | 40.7  | 0.1 (0.1, 0.2) | 26 (26, 27) | 512 (327, 712)   | 582 (506, 659)     | 30 (19, 41)   | 1124 (886, 1366)   | 13 (8, 17)    | 14 (12, 16)    | 1 (0, 1)   | 28 (22, 34)    | 0.4 (0.3, 0.6) | 3.9 (3.4, 4.4)    | 0.3 (0.2, 0.5) | 0.8 (0.6, 0.9)  |
| Iraq                       | Women | Ages 20 to 44     | 2.25  | 0.7 (0.2, 1.2) | 27 (26, 29) | 21 (13, 31)      | 90 (67, 114)       | 2 (1, 4)      | 114 (88, 142)      | 5 (3, 8)      | 23 (17, 29)    | 1 (0, 1)   | 29 (23, 36)    | 2.2 (1.3, 3.2) | 16.1 (12.0, 20.3) | 0.5 (0.3, 0.7) | 5.9 (4.5, 7.3)  |
| Iraq                       | Women | Ages 45 to 64     | 1.6   | 0.4 (0.1, 0.6) | 30 (29, 32) | 44 (26, 63)      | 159 (109, 207)     | 4 (2, 5)      | 207 (149, 262)     | 28 (16, 39)   | 99 (68, 129)   | 2 (1, 3)   | 129 (93, 163)  | 1.2 (0.7, 1.7) | 8.6 (5.9, 11.2)   | 0.4 (0.2, 0.5) | 3.3 (2.4, 4.2)  |
| Iraq                       | Women | Ages 65 and older | 2.27  | 0.3 (0.1, 0.4) | 28 (25, 32) | 85 (50, 121)     | 190 (132, 246)     | 3 (2, 4)      | 278 (206, 351)     | 137 (81, 195) | 306 (212, 396) | 4 (2, 6)   | 448 (332, 564) | 0.5 (0.3, 0.8) | 4.4 (3.1, 5.8)    | 0.3 (0.2, 0.5) | 1.4 (1.0, 1.7)  |
| Iraq                       | Women | Overall           | 6.12  | 0.4 (0.1, 0.8) | 28 (26, 30) | 151 (90, 211)    | 440 (365, 515)     | 9 (5, 12)     | 599 (492, 710)     | 25 (15, 34)   | 70 (60, 84)    | 1 (1, 2)   | 98 (80, 116)   | 0.7 (0.4, 1.0) | 6.6 (5.5, 7.7)    | 0.4 (0.2, 0.6) | 2.1 (1.7, 2.5)  |
| Iraq                       | Men   | Ages 20 to 44     | 2.36  | 0.7 (0.2, 1.3) | 26 (25, 27) | 20 (13, 30)      | 55 (39, 69)        | 0 (0, 1)      | 76 (57, 94)        | 5 (3, 7)      | 14 (10, 19)    | 0 (0, 0)   | 19 (14, 24)    | 2.1 (1.3, 3.0) | 16.5 (11.9, 20.9) | 0.3 (0.2, 0.5) | 5.7 (4.3, 7.0)  |
| Iraq                       | Men   | Ages 45 to 64     | 1.3   | 0.4 (0.1, 0.6) | 28 (27, 29) | 44 (26, 62)      | 97 (65, 128)       | 1 (0, 1)      | 142 (105, 181)     | 34 (20, 48)   | 75 (50, 99)    | 1 (0, 1)   | 109 (81, 140)  | 1.1 (0.7, 1.6) | 8.7 (5.9, 11.5)   | 0.3 (0.2, 0.5) | 2.8 (2.1, 3.6)  |
| Iraq                       | Men   | Ages 65 and older | 2.02  | 0.3 (0.1, 0.5) | 26 (24, 28) | 51 (31, 73)      | 96 (65, 125)       | 1 (1, 2)      | 149 (106, 189)     | 124 (74, 176) | 232 (156, 303) | 2 (1, 4)   | 359 (256, 457) | 0.6 (0.4, 0.9) | 5.0 (3.4, 6.5)    | 0.3 (0.1, 0.4) | 1.4 (1.0, 1.8)  |
| Iraq                       | Men   | Overall           | 5.68  | 0.5 (0.1, 0.8) | 27 (25, 28) | 116 (69, 163)    | 248 (200, 295)     | 2 (1, 3)      | 366 (293, 439)     | 20 (12, 29)   | 44 (35, 52)    | 0 (0, 1)   | 64 (52, 77)    | 0.9 (0.5, 1.2) | 7.4 (5.9, 8.8)    | 0.3 (0.2, 0.4) | 2.2 (1.7, 2.6)  |
| Iraq                       | Both  | Overall           | 11.8  | 0.5 (0.1, 0.8) | 27 (26, 29) | 266 (162, 371)   | 688 (593, 776)     | 11 (6, 16)    | 965 (796, 1134)    | 23 (14, 31)   | 58 (50, 66)    | 1 (1, 1)   | 82 (68, 96)    | 0.8 (0.5, 1.1) | 6.8 (5.9, 7.7)    | 0.4 (0.2, 0.5) | 2.1 (1.8, 2.5)  |
| Ireland                    | Women | Ages 20 to 44     | 0.392 | 0.6 (0.4, 0.7) | 26 (25, 27) | 0 (0, 0)         | 1 (1, 1)           | 0 (0, 0)      | 1 (1, 2)           | 0 (0, 1)      | 1 (1, 2)       | 0 (0, 0)   | 2 (1, 2)       | 1.7 (1.0, 2.4) | 13.6 (9.9, 17.4)  | 0.4 (0.2, 0.5) | 1.5 (1.1, 1.8)  |
| Ireland                    | Women | Ages 45 to 64     | 0.509 | 0.2 (0.2, 0.3) | 28 (27, 29) | 2 (1, 2)         | 2 (1, 3)           | 1 (1, 2)      | 5 (4, 6)           | 3 (2, 4)      | 4 (3, 6)       | 3 (2, 4)   | 10 (7, 13)     | 0.9 (0.5, 1.2) | 6.9 (4.7, 9.4)    | 0.3 (0.2, 0.4) | 0.7 (0.5, 0.9)  |
| Ireland                    | Women | Ages 65 and older | 0.614 | 0.2 (0.1, 0.2) | 28 (26, 29) | 12 (6, 19)       | 12 (9, 15)         | 3 (2, 5)      | 27 (19, 36)        | 42 (22, 69)   | 42 (30, 52)    | 11 (7, 16) | 95 (68, 128)   | 0.3 (0.2, 0.5) | 2.8 (2.0, 3.5)    | 0.3 (0.2, 0.4) | 0.5 (0.3, 0.6)  |
| Ireland                    | Women | Overall           | 1.52  | 0.3 (0.3, 0.4) | 27 (26, 28) | 14 (8, 22)       | 15 (11, 18)        | 5 (3, 7)      | 33 (24, 44)        | 9 (5, 14)     | 10 (8, 12)     | 3 (2, 4)   | 22 (16, 29)    | 0.3 (0.2, 0.5) | 3.2 (2.5, 3.9)    | 0.3 (0.2, 0.4) | 0.5 (0.4, 0.7)  |
| Ireland                    | Men   | Ages 20 to 44     | 0.384 | 0.6 (0.5, 0.8) | 27 (26, 28) | 1 (1, 2)         | 2 (1, 2)           | 0 (0, 0)      | 3 (2, 4)           | 2 (1, 2)      | 2 (2, 3)       | 0 (0, 0)   | 4 (3, 5)       | 1.7 (1.0, 2.5) | 14.5 (10.3, 18.5) | 0.4 (0.2, 0.6) | 2.7 (2.0, 3.4)  |
| Ireland                    | Men   | Ages 45 to 64     | 0.512 | 0.3 (0.2, 0.3) | 29 (28, 30) | 6 (4, 9)         | 5 (3, 6)           | 1 (1, 2)      | 12 (9, 16)         | 12 (7, 17)    | 9 (6, 12)      | 3 (2, 4)   | 24 (17, 32)    | 0.9 (0.5, 1.3) | 7.2 (5.0, 9.5)    | 0.3 (0.2, 0.5) | 1.1 (0.8, 1.4)  |
| Ireland                    | Men   | Ages 65 and older | 0.569 | 0.2 (0.2, 0.2) | 28 (27, 29) | 13 (8, 20)       | 15 (11, 19)        | 4 (2, 5)      | 32 (23, 41)        | 58 (34, 87)   | 64 (48, 81)    | 16 (9, 22) | 137 (99, 177)  | 0.4 (0.2, 0.6) | 3.3 (2.5, 4.1)    | 0.2 (0.1, 0.3) | 0.6 (0.5, 0.8)  |
| Ireland                    | Men   | Overall           | 1.46  | 0.4 (0.3, 0.5) | 28 (27, 29) | 21 (13, 30)      | 21 (17, 25)        | 5 (3, 8)      | 47 (35, 61)        | 14 (9, 21)    | 15 (12, 17)    | 4 (2, 5)   | 32 (24, 41)    | 0.5 (0.3, 0.7) | 4.0 (3.3, 4.8)    | 0.2 (0.1, 0.4) | 0.8 (0.6, 1.0)  |
| Ireland                    | Both  | Overall           | 2.98  | 0.4 (0.3, 0.4) | 27 (26, 28) | 35 (21, 51)      | 36 (30, 42)        | 10 (6, 14)    | 81 (61, 103)       | 12 (7, 17)    | 12 (10, 14)    | 3 (2, 5)   | 27 (20, 34)    | 0.4 (0.3, 0.6) | 3.6 (3.1, 4.2)    | 0.3 (0.2, 0.4) | 0.6 (0.5, 0.8)  |
| Israel                     | Women | Ages 20 to 44     | 0.557 | 0.6 (0.5, 0.8) | 25 (24, 27) | 0 (0, 0)         | 2 (1, 2)           | 0 (0, 1)      | 3 (2, 3)           | 0 (0, 0)      | 2 (1, 2)       | 0 (0, 1)   | 2 (2, 3)       | 1.8 (1.1, 2.6) | 13.9 (9.4, 18.1)  | 0.4 (0.2, 0.5) | 1.8 (1.3, 2.3)  |
| Israel                     | Women | Ages 45 to 64     | 0.768 | 0.3 (0.2, 0.3) | 30 (28, 31) | 2 (1, 3)         | 16 (11, 21)        | 2 (1, 3)      | 19 (13, 25)        | 2 (1, 3)      | 20 (14, 28)    | 2 (1, 3)   | 25 (17, 33)    | 1.0 (0.6, 1.3) | 7.2 (4.9, 9.9)    | 0.3 (0.2, 0.4) | 1.8 (1.3, 2.4)  |
| Israel                     | Women | Ages 65 and older | 0.902 | 0.2 (0.2, 0.3) | 29 (28, 31) | 16 (8, 25)       | 77 (56, 97)        | 5 (3, 7)      | 97 (73, 122)       | 37 (19, 60)   | 181 (133, 229) | 11 (7, 16) | 229 (173, 288) | 0.4 (0.2, 0.6) | 3.0 (2.2, 3.8)    | 0.2 (0.1, 0.3) | 1.2 (0.9, 1.5)  |
| Israel                     | Women | Overall           | 2.23  | 0.4 (0.3, 0.5) | 28 (27, 29) | 18 (10, 28)      | 94 (73, 116)       | 7 (4, 10)     | 119 (93, 145)      | 8 (4, 13)     | 42 (33, 52)    | 3 (2, 4)   | 53 (42, 65)    | 0.4 (0.2, 0.6) | 3.4 (2.6, 4.1)    | 0.2 (0.1, 0.3) | 1.2 (1.0, 1.5)  |
| Israel                     | Men   | Ages 20 to 44     | 0.561 | 0.7 (0.6, 0.9) | 26 (25, 27) | 1 (1, 2)         | 4 (3, 5)           | 0 (0, 0)      | 6 (4, 7)           | 1 (1, 2)      | 4 (3, 5)       | 0 (0, 0)   | 6 (4, 7)       | 1.9 (1.1, 2.7) | 15.1 (10.2, 20.0) | 0.2 (0.1, 0.4) | 4.1 (3.0, 5.2)  |
| Israel                     | Men   | Ages 45 to 64     | 0.716 | 0.3 (0.2, 0.4) | 29 (28, 30) | 6 (4, 9)         | 30 (20, 39)        | 1 (1, 2)      | 37 (27, 48)        | 9 (5, 13)     | 41 (28, 55)    | 2 (1, 3)   | 52 (37, 67)    | 1.0 (0.6, 1.4) | 7.6 (5.1, 10.1)   | 0.2 (0.1, 0.3) | 2.8 (2.0, 3.6)  |
| Israel                     | Men   | Ages 65 and older | 0.794 | 0.2 (0.2, 0.3) | 28 (27, 29) | 15 (8, 23)       | 64 (48, 81)        | 4 (2, 6)      | 83 (63, 104)       | 45 (24, 70)   | 199 (147, 250) | 13 (7, 18) | 257 (196, 321) | 0.4 (0.2, 0.6) | 3.4 (2.5, 4.2)    | 0.1 (0.1, 0.2) | 1.3 (1.0, 1.6)  |
| Israel                     | Men   | Overall           | 2.07  | 0.4 (0.3, 0.5) | 27 (27, 28) | 23 (13, 33)      | 98 (78, 117)       | 6 (3, 8)      | 126 (101, 153)     | 11 (6, 16)    | 47 (38, 57)    | 3 (2, 4)   | 61 (49, 74)    | 0.5 (0.3, 0.8) | 4.2 (3.4, 5.0)    | 0.2 (0.1, 0.2) | 1.6 (1.3, 2.0)  |
| Israel                     | Both  | Overall           | 4.3   | 0.4 (0.3, 0.5) | 28 (27, 29) | 41 (24, 61)      | 192 (162, 220)     | 13 (7, 18)    | 245 (204, 289)     | 9 (5, 14)     | 45 (38, 51)    | 3 (2, 4)   | 57 (48, 67)    | 0.4 (0.3, 0.7) | 3.7 (3.2, 4.3)    | 0.2 (0.1, 0.3) | 1.4 (1.2, 1.7)  |
| Italy                      | Women | Ages 20 to 44     | 3.66  | 0.2 (0.1, 0.2) | 23 (22, 24) | 1 (0, 1)         | 5 (3, 7)           | 1 (0, 1)      | 7 (4, 9)           | 0 (0, 0)      | 1 (0, 1)       | 0 (0, 0)   | 1 (1, 1)       | 0.4 (0.2, 0.7) | 7.2 (4.3, 10.1)   | 0.1 (0.0, 0.1) | 0.5 (0.3, 0.7)  |
| Italy                      |       |                   |       |                |             |                  |                    |               |                    |               |                |            |                |                |                   |                |                 |

|            |       |                   |         |                |             |                |                |               |                  |                |                  |             |                   |                |                   |                |                   |
|------------|-------|-------------------|---------|----------------|-------------|----------------|----------------|---------------|------------------|----------------|------------------|-------------|-------------------|----------------|-------------------|----------------|-------------------|
| Japan      | Women | Ages 65 and older | 25.6    | 0.1 (0.1, 0.1) | 23 (22, 24) | 152 (68, 257)  | 188 (130, 245) | 66 (32, 109)  | 406 (273, 556)   | 9 (4, 15)      | 11 (8, 15)       | 4 (2, 7)    | 24 (16, 33)       | 0.1 (0.0, 0.2) | 2.0 (1.4, 2.6)    | 0.1 (0.1, 0.2) | 0.2 (0.1, 0.2)    |
| Japan      | Women | Overall           | 50.2    | 0.2 (0.1, 0.2) | 22 (21, 23) | 165 (75, 277)  | 220 (162, 279) | 81 (40, 129)  | 466 (323, 621)   | 3 (2, 6)       | 4 (3, 6)         | 2 (1, 3)    | 9 (6, 12)         | 0.1 (0.0, 0.2) | 2.2 (1.6, 2.7)    | 0.1 (0.1, 0.2) | 0.2 (0.1, 0.3)    |
| Japan      | Men   | Ages 20 to 44     | 7.83    | 0.4 (0.3, 0.4) | 23 (23, 24) | 9 (5, 14)      | 26 (17, 35)    | 1 (1, 2)      | 37 (26, 48)      | 1 (0, 1)       | 2 (1, 2)         | 0 (0, 0)    | 2 (2, 3)          | 0.6 (0.3, 0.9) | 9.6 (6.2, 12.8)   | 0.1 (0.0, 0.1) | 1.3 (0.9, 1.8)    |
| Japan      | Men   | Ages 45 to 64     | 16.8    | 0.2 (0.1, 0.2) | 24 (23, 25) | 43 (22, 64)    | 111 (73, 149)  | 22 (11, 34)   | 176 (125, 225)   | 3 (1, 4)       | 7 (4, 9)         | 1 (1, 2)    | 10 (7, 13)        | 0.3 (0.2, 0.5) | 5.7 (3.8, 7.7)    | 0.1 (0.1, 0.2) | 0.6 (0.4, 0.8)    |
| Japan      | Men   | Ages 65 and older | 21.6    | 0.1 (0.1, 0.1) | 23 (23, 24) | 136 (67, 213)  | 195 (139, 245) | 69 (35, 107)  | 400 (282, 528)   | 11 (5, 17)     | 16 (11, 20)      | 6 (3, 9)    | 32 (23, 42)       | 0.2 (0.1, 0.2) | 3.6 (1.9, 3.3)    | 0.1 (0.0, 0.2) | 0.2 (0.2, 0.3)    |
| Japan      | Men   | Overall           | 46.3    | 0.2 (0.2, 0.3) | 23 (23, 24) | 188 (93, 287)  | 331 (262, 401) | 93 (47, 141)  | 612 (445, 779)   | 4 (2, 6)       | 7 (6, 9)         | 2 (1, 3)    | 3 (2, 4)          | 0.1 (0.1, 0.2) | 2.5 (2.7, 4.2)    | 0.1 (0.0, 0.2) | 0.3 (0.2, 0.4)    |
| Japan      | Both  | Overall           | 96.4    | 0.2 (0.2, 0.2) | 23 (22, 23) | 353 (176, 546) | 552 (463, 640) | 173 (87, 264) | 1078 (788, 1387) | 4 (2, 6)       | 6 (5, 7)         | 2 (1, 3)    | 11 (8, 14)        | 0.1 (0.1, 0.2) | 2.8 (2.3, 3.2)    | 0.1 (0.1, 0.2) | 0.2 (0.2, 0.3)    |
| Jordan     | Women | Ages 20 to 44     | 0.492   | 0.8 (0.2, 1.4) | 27 (27, 28) | 3 (2, 4)       | 10 (7, 13)     | 1 (0, 1)      | 13 (10, 17)      | 3 (2, 5)       | 12 (9, 16)       | 1 (1, 1)    | 17 (13, 21)       | 2.4 (1.4, 3.5) | 17.7 (12.8, 22.5) | 0.5 (0.3, 0.8) | 4.1 (3.1, 5.2)    |
| Jordan     | Women | Ages 45 to 64     | 0.302   | 0.4 (0.1, 0.7) | 32 (31, 33) | 8 (4, 11)      | 39 (26, 51)    | 1 (1, 2)      | 47 (34, 60)      | 25 (15, 37)    | 128 (85, 169)    | 4 (2, 5)    | 157 (113, 200)    | 1.3 (0.8, 2.0) | 9.4 (6.3, 12.4)   | 0.4 (0.2, 0.6) | 4.0 (2.9, 5.1)    |
| Jordan     | Women | Ages 65 and older | 0.436   | 0.3 (0.1, 0.5) | 30 (29, 31) | 15 (9, 21)     | 60 (44, 78)    | 1 (0, 1)      | 76 (57, 96)      | 127 (74, 181)  | 512 (373, 667)   | 7 (4, 10)   | 646 (484, 821)    | 0.6 (0.4, 0.9) | 5.0 (3.6, 6.5)    | 0.3 (0.2, 0.5) | 2.2 (1.6, 2.8)    |
| Jordan     | Women | Overall           | 1.23    | 0.5 (0.2, 0.9) | 29 (29, 30) | 25 (15, 35)    | 109 (86, 132)  | 3 (2, 4)      | 136 (110, 164)   | 20 (12, 29)    | 88 (70, 107)     | 2 (1, 3)    | 111 (89, 133)     | 0.8 (0.5, 1.2) | 6.5 (5.2, 7.9)    | 0.4 (0.2, 0.6) | 2.7 (2.2, 3.3)    |
| Jordan     | Men   | Ages 20 to 44     | 0.526   | 0.9 (0.3, 1.5) | 26 (25, 27) | 5 (3, 7)       | 9 (6, 11)      | 0 (0, 0)      | 13 (10, 17)      | 5 (3, 8)       | 10 (7, 12)       | 0 (0, 0)    | 15 (11, 19)       | 2.4 (1.4, 3.4) | 18.1 (12.6, 23.0) | 0.3 (0.2, 0.5) | 4.8 (3.6, 6.0)    |
| Jordan     | Men   | Ages 45 to 64     | 0.303   | 0.4 (0.1, 0.8) | 29 (28, 30) | 9 (6, 14)      | 27 (19, 37)    | 0 (0, 1)      | 37 (28, 47)      | 31 (19, 45)    | 91 (61, 121)     | 2 (1, 2)    | 123 (91, 156)     | 1.3 (0.8, 1.9) | 9.5 (6.5, 12.7)   | 0.2 (0.1, 0.4) | 3.5 (2.6, 4.5)    |
| Jordan     | Men   | Ages 65 and older | 0.476   | 0.3 (0.1, 0.6) | 28 (27, 29) | 14 (8, 20)     | 48 (33, 62)    | 1 (0, 1)      | 62 (46, 79)      | 114 (67, 162)  | 380 (260, 497)   | 5 (3, 8)    | 499 (369, 635)    | 0.7 (0.4, 0.9) | 5.2 (3.6, 6.8)    | 0.2 (0.1, 0.3) | 2.1 (1.5, 2.6)    |
| Jordan     | Men   | Overall           | 1.3     | 0.6 (0.2, 1.0) | 28 (27, 29) | 28 (17, 40)    | 83 (65, 101)   | 1 (1, 2)      | 113 (90, 136)    | 22 (13, 31)    | 64 (50, 77)      | 1 (1, 1)    | 87 (69, 104)      | 0.9 (0.6, 1.3) | 6.7 (5.2, 8.1)    | 0.2 (0.1, 0.3) | 2.6 (2.1, 3.1)    |
| Jordan     | Both  | Overall           | 2.53    | 0.6 (0.2, 0.9) | 29 (28, 29) | 53 (33, 75)    | 192 (162, 222) | 4 (2, 6)      | 250 (209, 292)   | 21 (13, 30)    | 76 (64, 88)      | 2 (1, 2)    | 98 (82, 115)      | 0.9 (0.5, 1.2) | 6.6 (5.6, 7.6)    | 0.3 (0.2, 0.5) | 2.7 (2.2, 3.1)    |
| Kazakhstan | Women | Ages 20 to 44     | 1.29    | 0.4 (0.1, 0.6) | 25 (23, 26) | 7 (5, 10)      | 12 (9, 15)     | 1 (1, 1)      | 20 (16, 25)      | 3 (2, 4)       | 5 (4, 6)         | 0 (0, 1)    | 8 (7, 10)         | 1.2 (0.7, 1.6) | 11.2 (8.2, 14.1)  | 0.3 (0.2, 0.4) | 1.8 (1.4, 2.2)    |
| Kazakhstan | Women | Ages 45 to 64     | 1.82    | 0.2 (0.1, 0.3) | 29 (27, 32) | 36 (22, 51)    | 35 (24, 46)    | 5 (3, 8)      | 77 (56, 100)     | 20 (12, 28)    | 19 (13, 25)      | 3 (2, 4)    | 42 (31, 55)       | 0.8 (0.5, 1.2) | 6.3 (4.3, 8.3)    | 0.3 (0.2, 0.5) | 1.1 (0.8, 1.4)    |
| Kazakhstan | Women | Ages 65 and older | 1.84    | 0.1 (0.0, 0.2) | 29 (25, 33) | 96 (57, 142)   | 40 (28, 53)    | 7 (4, 11)     | 143 (98, 196)    | 130 (77, 192)  | 54 (38, 72)      | 10 (6, 15)  | 195 (132, 265)    | 0.4 (0.2, 0.5) | 3.9 (2.7, 5.2)    | 0.4 (0.2, 0.5) | 0.4 (0.3, 0.6)    |
| Kazakhstan | Women | Overall           | 4.94    | 0.2 (0.1, 0.4) | 27 (25, 30) | 140 (85, 201)  | 87 (68, 106)   | 14 (8, 20)    | 240 (175, 313)   | 28 (17, 41)    | 18 (14, 21)      | 3 (2, 4)    | 49 (35, 63)       | 0.4 (0.3, 0.6) | 5.1 (4.0, 6.3)    | 0.3 (0.2, 0.5) | 0.6 (0.4, 0.5)    |
| Kazakhstan | Men   | Ages 20 to 44     | 1.28    | 0.4 (0.1, 0.8) | 25 (23, 27) | 26 (16, 38)    | 15 (11, 20)    | 1 (0, 1)      | 43 (30, 56)      | 11 (7, 16)     | 7 (5, 9)         | 0 (0, 0)    | 18 (13, 24)       | 1.4 (0.9, 2.1) | 12.0 (8.6, 15.4)  | 0.3 (0.2, 0.5) | 1.9 (1.4, 2.5)    |
| Kazakhstan | Men   | Ages 45 to 64     | 1.49    | 0.2 (0.1, 0.4) | 28 (25, 30) | 94 (57, 133)   | 32 (22, 42)    | 6 (4, 9)      | 132 (92, 177)    | 63 (38, 89)    | 21 (15, 28)      | 4 (2, 6)    | 89 (61, 118)      | 0.9 (0.5, 1.2) | 6.8 (4.7, 8.9)    | 0.4 (0.3, 0.7) | 1.0 (0.7, 1.3)    |
| Kazakhstan | Men   | Ages 65 and older | 1.39    | 0.2 (0.0, 0.3) | 27 (24, 30) | 77 (46, 109)   | 17 (11, 23)    | 6 (4, 9)      | 100 (66, 136)    | 222 (131, 313) | 49 (33, 65)      | 17 (10, 25) | 288 (190, 390)    | 0.5 (0.3, 0.7) | 4.2 (2.8, 5.7)    | 0.4 (0.2, 0.6) | 0.5 (0.3, 0.7)    |
| Kazakhstan | Men   | Overall           | 4.16    | 0.3 (0.1, 0.5) | 27 (24, 29) | 198 (120, 276) | 64 (52, 77)    | 13 (8, 18)    | 276 (192, 366)   | 48 (29, 66)    | 15 (13, 19)      | 3 (2, 4)    | 66 (46, 88)       | 0.7 (0.4, 0.9) | 6.4 (5.2, 7.7)    | 0.4 (0.2, 0.6) | 0.8 (0.5, 1.0)    |
| Kazakhstan | Both  | Overall           | 9.11    | 0.3 (0.1, 0.4) | 27 (24, 30) | 338 (204, 473) | 151 (128, 174) | 27 (16, 38)   | 516 (364, 672)   | 37 (22, 52)    | 17 (14, 19)      | 3 (2, 4)    | 57 (40, 74)       | 0.6 (0.3, 0.8) | 5.6 (4.8, 6.4)    | 0.4 (0.2, 0.5) | 0.7 (0.5, 0.9)    |
| Kenya      | Women | Ages 20 to 44     | 3.18    | 1.1 (0.3, 1.9) | 23 (22, 24) | 4 (2, 7)       | 43 (31, 53)    | 1 (0, 1)      | 48 (35, 59)      | 1 (0, 1)       | 9 (6, 11)        | 0 (0, 0)    | 10 (7, 12)        | 1.5 (0.7, 2.5) | 20.0 (14.4, 24.9) | 0.4 (0.2, 0.6) | 7.2 (5.3, 8.9)    |
| Kenya      | Women | Ages 45 to 64     | 1.98    | 0.5 (0.1, 0.9) | 24 (22, 25) | 7 (4, 11)      | 79 (52, 106)   | 3 (2, 5)      | 89 (62, 118)     | 4 (2, 6)       | 40 (27, 54)      | 2 (1, 2)    | 45 (31, 60)       | 0.7 (0.3, 1.0) | 9.7 (6.4, 13.0)   | 0.3 (0.1, 0.4) | 2.9 (2.0, 3.9)    |
| Kenya      | Women | Ages 65 and older | 2.36    | 0.4 (0.1, 0.7) | 22 (19, 25) | 14 (7, 22)     | 107 (73, 140)  | 2 (1, 3)      | 124 (89, 160)    | 25 (13, 38)    | 184 (126, 240)   | 4 (2, 6)    | 213 (152, 274)    | 0.3 (0.2, 0.5) | 4.9 (3.4, 6.4)    | 0.3 (0.1, 0.4) | 1.7 (1.2, 2.2)    |
| Kenya      | Women | Overall           | 7.51    | 0.7 (0.2, 1.2) | 23 (21, 25) | 26 (13, 39)    | 229 (185, 274) | 6 (3, 9)      | 261 (211, 311)   | 3 (2, 5)       | 30 (25, 37)      | 1 (0, 1)    | 35 (28, 41)       | 0.4 (0.2, 0.6) | 7.1 (5.7, 8.5)    | 0.3 (0.1, 0.4) | 2.4 (1.9, 2.8)    |
| Kenya      | Men   | Ages 20 to 44     | 3.21    | 1.2 (0.4, 2.0) | 21 (19, 23) | 8 (4, 12)      | 94 (66, 118)   | 1 (0, 1)      | 102 (73, 127)    | 2 (1, 2)       | 18 (13, 23)      | 0 (0, 0)    | 20 (14, 25)       | 1.2 (0.6, 1.8) | 18.5 (13.0, 23.3) | 0.6 (0.3, 1.0) | 5.1 (3.6, 6.4)    |
| Kenya      | Men   | Ages 45 to 64     | 1.77    | 0.6 (0.2, 1.0) | 22 (20, 24) | 10 (5, 15)     | 151 (102, 200) | 3 (1, 4)      | 164 (113, 214)   | 6 (3, 9)       | 85 (57, 112)     | 2 (1, 2)    | 92 (64, 121)      | 0.6 (0.3, 1.0) | 10.3 (6.9, 13.6)  | 0.5 (0.2, 0.8) | 9.2 (3.5, 11.7)   |
| Kenya      | Men   | Ages 65 and older | 2.37    | 0.4 (0.1, 0.7) | 22 (19, 24) | 11 (5, 16)     | 147 (103, 193) | 2 (1, 4)      | 160 (114, 206)   | 21 (11, 32)    | 299 (209, 391)   | 5 (3, 8)    | 326 (231, 419)    | 0.3 (0.1, 0.4) | 5.4 (3.8, 7.0)    | 0.4 (0.2, 0.7) | 2.5 (1.8, 3.2)    |
| Kenya      | Men   | Overall           | 7.35    | 0.8 (0.2, 1.3) | 22 (19, 24) | 29 (15, 43)    | 392 (318, 463) | 6 (3, 9)      | 426 (348, 502)   | 4 (2, 6)       | 53 (43, 63)      | 1 (0, 1)    | 58 (47, 68)       | 0.5 (0.2, 0.7) | 8.3 (6.8, 9.8)    | 0.5 (0.2, 0.7) | 4.0 (3.3, 4.7)    |
| Kenya      | Both  | Overall           | 14.9    | 0.7 (0.2, 1.2) | 22 (20, 24) | 55 (28, 82)    | 621 (530, 707) | 12 (6, 18)    | 687 (585, 787)   | 4 (2, 6)       | 42 (36, 48)      | 1 (0, 1)    | 46 (39, 53)       | 0.4 (0.2, 0.7) | 7.8 (6.7, 8.9)    | 0.3 (0.2, 0.5) | 3.2 (2.7, 3.6)    |
| Kiribati   | Women | Ages 20 to 44     | 0.00702 | 2.4 (0.6, 4.2) | 31 (30, 33) | 0 (0, 0)       | 3 (2, 3)       | 0 (0, 0)      | 3 (2, 4)         | 11 (7, 16)     | 216 (146, 267)   | 2 (1, 3)    | 229 (160, 282)    | 6.2 (3.7, 8.8) | 34.4 (23.3, 42.5) | 1.2 (0.7, 1.8) | 31.8 (22.2, 39.2) |
| Kiribati   | Women | Ages 45 to 64     | 0.00616 | 1.2 (0.3, 2.0) | 32 (31, 34) | 0 (0, 0)       | 8 (5, 10)      | 0 (0, 0)      | 8 (5, 10)        | 30 (18, 43)    | 1227 (851, 1559) | 7 (4, 10)   | 1265 (882, 1602)  | 2.7 (1.6, 3.9) | 18.9 (13.1, 23.9) | 0.9 (0.5, 1.3) | 22.1 (15.4, 28.1) |
| Kiribati   | Women | Ages 65 and older | 0.00715 | 0.9 (0.2, 1.5) | 27 (24, 31) | 0 (0, 0)       | 3 (2, 4)       | 0 (0, 0)      | 4 (2, 5)         | 95 (58, 136)   | 237 (1411, 3004) | 19 (12, 28) | 2351 (1524, 3134) | 1.3 (0.8, 1.8) | 10.6 (6.7, 14.2)  | 0.8 (0.5, 1.2) | 10.6 (6.8, 14.1)  |
| Kiribati   | Women | Overall           | 0.0203  | 1.5 (0.4, 2.6) | 30 (28, 32) | 0 (0, 1)       | 14 (11, 16)    | 0 (0, 0)      | 14 (11, 17)      | 23 (14, 32)    | 670 (536, 789)   | 5 (3, 7)    | 698 (559, 822)    | 2.3 (1.4, 3.3) | 17.1 (13.7, 20.2) | 0.9 (0.6, 1.3) | 18.3 (14.7, 21.6) |
| Kiribati   | Men   | Ages 20 to 44     | 0.00731 | 2.6 (0.7, 4.5) | 29 (28, 30) | 1 (0, 1)       | 3 (2, 4)       | 0 (0, 0)      | 4 (3, 5)         | 51 (31, 72)    | 258 (181, 321)   | 1 (1, 1)    | 310 (227, 380)    | 6.5 (4.0, 9.2) | 35.4 (24.8, 44.0) | 1.1 (0.6, 1.6) | 25.5 (17.2, 28.9) |
| Kiribati   | Men   | Ages 45 to 64     | 0.00609 | 1.2 (0.3, 2.1) | 30 (29, 31) | 1 (1, 1)       | 9 (7, 12)      | 0 (0, 0)      | 10 (7, 13)       | 145 (86, 203)  | 519 (1073, 1924) | 9 (5, 13)   | 1674 (1199, 2099) | 1.8 (1.7, 3.9) | 20.3 (14.3, 25.7) | 1.0 (0.6, 1.5) | 9.5 (11.3, 19.8)  |
| Kiribati   | Men   | Ages 65 and older | 0.00683 | 0.9 (0.3, 1.6) | 28 (26, 30) | 0 (0, 0)       | 3 (2, 4)       | 0 (0, 0)      | 4 (2, 5)         | 174 (104, 245) | 517 (1608, 3404) | 28 (17, 40) | 2719 (1777, 3622) | 2.3 (0.8, 1.8) | 11.8 (7.5, 15.9)  | 1.0 (0.6, 1.4) | 9.3 (6.1, 12.5)   |
| Kiribati   | Men   | Overall           | 0.0202  | 1.6 (0.4, 2.8) | 29 (27, 30) | 2 (1, 2)       | 16 (13, 19)    | 0 (0, 0)      | 18 (14, 21)      | 87 (52, 122)   | 784 (624, 924)   | 5 (3, 7)    | 877 (695, 1033)   | 3.0 (1.8, 4.2) | 19.1 (15.2, 22.5) | 1.0 (0.6, 1.5) | 14.8 (11.8, 17.5) |
| Kiribati   | Both  | Overall           | 0.0406  | 1.6 (0.4, 2.7) | 29 (28, 31) | 2 (1, 3)       | 29 (25, 34)    | 0 (0, 0)      | 32 (27, 37)      | 55 (33, 77)    | 727 (621, 836)   | 5 (3, 7)    | 787 (671, 909)    | 2.8 (1.7, 3.9) | 18.1 (15.5, 20.8) | 1.0 (0.6, 1.4) | 16.2 (13.8, 18.7) |
| Kuwait     | Women | Ages 20 to 44     | 0.24    | 0.6 (0.2, 1.0) | 30 (29, 31) | 1 (1, 1)       | 2 (1, 2)       | 0 (0, 0)      | 3 (2, 3)         | 2 (1, 3)       | 4 (3, 5)         | 0 (0, 0)    | 7 (5, 8)          | 2.0 (1.2, 3.0) | 14.2 (9.8, 18.4)  | 0.4 (0.2, 0.6) | 3.0 (2.2, 3.9)    |
| Kuwait     | Women | Ages 45 to 64     | 0.12    | 0.3 (0.1, 0.5) | 33 (32, 35) | 2 (1, 2)       | 5 (3, 7)       | 0 (0, 0)      | 7 (5, 9)         | 13 (8, 18)     | 42 (29, 55)      | 2 (1, 3)    | 56 (41, 71)       | 1.2 (0.7, 1.7) | 8.3 (5.7, 10.9)   | 0.3 (0.2, 0.5) | 2.7 (2.0, 3.4)    |
| Kuwait     | Women | Ages 65 and older | 0.199   | 0.2 (0.1, 0.4) | 31 (29, 33) | 2 (1, 3)       | 5 (4, 7)       | 0 (0, 0)      | 7 (5, 9)         | 79 (47, 115)   | 200 (143, 258)   | 5 (3, 7)    | 284 (212, 361)    | 0.6 (0.4, 0.9) | 4.3 (3.1, 5.6)    | 0.3 (0.2, 0.5) | 1.5 (1.1, 1.9)    |
| Kuwait     | Women | Overall           | 0.559   | 0.4 (0.1, 0.7) | 31 (30, 32) | 4 (3, 6)       | 12 (10, 14)    | 0 (0, 1)      | 17 (13, 20)      | 8 (5, 11)      | 21 (17, 25)      | 1 (0, 1)    | 30 (24, 36)       | 0.9 (0.5, 1.3) | 6.2 (5.1, 7.4)    | 0.4 (0.2, 0.5) | 2.1 (1.7, 2.5)    |
| Kuwait     | Men   | Ages 20 to 44     | 0.422   | 0.6 (0.2, 1.1) | 29 (28, 30) | 5 (3, 8)       | 3 (2, 4)       | 0 (0, 0)      | 9 (6, 11)        | 7 (4, 10)      | 4 (3, 6)         | 0 (0, 0)    | 12 (8, 15)        | 2.0 (1.1, 2.8) | 14.9 (10.6, 19.5) | 0.3 (0.2, 0.5) | 2.7 (1.9, 3.5)    |
| Kuwait     | Men   | Ages 45 to 64     | 0.219   | 0.3 (0.1, 0.6) | 30 (29, 31) | 6 (4, 9)       | 8 (5, 10)      | 0 (0, 0)      | 14 (10, 18)      | 28 (17, 40)    | 34 (24, 45)      | 1 (0, 1)    | 63 (47, 80)       | 1.1 (0.7, 1.6) | 8.2 (5.7, 10.7)   | 0.2 (0.1, 0.4) | 2.0 (1.5, 2.5)    |
| Kuwait     | Men   | Ages 65 and older | 0.382   | 0.2 (0.1, 0.4) | 28 (27, 29) | 5 (3, 7)       | 11 (8, 14)     | 0 (0, 0)      | 16 (12, 20)      | 116 (69, 167)  | 250 (183, 317)   | 5 (3, 7)    | 371 (285, 458)    | 0.6 (0.3, 0.8) | 4.2 (3.1, 5.4)    | 0.2 (0.1, 0.3) | 1.4 (1.0, 1.7)    |
| Kuwait     | Men   | Overall           | 1.02    | 0.4 (0.        |             |                |                |               |                  |                |                  |             |                   |                |                   |                |                   |

|                        |       |                   |        |                |             |             |                |          |                |               |                |            |                |                |                   |                |                  |
|------------------------|-------|-------------------|--------|----------------|-------------|-------------|----------------|----------|----------------|---------------|----------------|------------|----------------|----------------|-------------------|----------------|------------------|
| Latvia                 | Women | Ages 20 to 44     | 0.163  | 0.1 (0.1, 0.2) | 23 (21, 26) | 0 (0, 0)    | 1 (0, 1)       | 0 (0, 0) | 1 (0, 1)       | 0 (0, 0)      | 2 (1, 2)       | 0 (0, 0)   | 2 (2, 3)       | 0.9 (0.5, 1.2) | 7.5 (5.1, 9.9)    | 0.2 (0.1, 0.3) | 1.5 (1.1, 1.9)   |
| Latvia                 | Women | Ages 45 to 64     | 0.32   | 0.1 (0.1, 0.1) | 28 (25, 31) | 3 (2, 4)    | 3 (2, 4)       | 1 (0, 1) | 6 (4, 8)       | 9 (5, 12)     | 8 (5, 11)      | 2 (1, 2)   | 19 (13, 24)    | 0.6 (0.4, 0.9) | 4.9 (3.2, 6.7)    | 0.2 (0.1, 0.3) | 0.7 (0.5, 0.9)   |
| Latvia                 | Women | Ages 65 and older | 0.42   | 0.1 (0.0, 0.1) | 29 (26, 32) | 21 (11, 33) | 8 (6, 11)      | 1 (1, 2) | 31 (20, 44)    | 81 (43, 126)  | 32 (24, 40)    | 6 (3, 8)   | 118 (78, 166)  | 0.2 (0.1, 0.4) | 2.6 (1.9, 3.2)    | 0.2 (0.1, 0.2) | 0.3 (0.2, 0.4)   |
| Latvia                 | Women | Overall           | 0.903  | 0.1 (0.1, 0.1) | 27 (24, 29) | 24 (13, 37) | 12 (9, 14)     | 2 (1, 3) | 38 (26, 52)    | 27 (15, 41)   | 13 (10, 15)    | 2 (1, 3)   | 42 (28, 57)    | 0.2 (0.1, 0.4) | 3.0 (2.4, 3.6)    | 0.2 (0.1, 0.2) | 0.3 (0.2, 0.4)   |
| Latvia                 | Men   | Ages 20 to 44     | 0.168  | 0.2 (0.1, 0.2) | 25 (24, 27) | 1 (0, 1)    | 1 (1, 1)       | 0 (0, 0) | 2 (1, 2)       | 2 (1, 3)      | 3 (2, 4)       | 0 (0, 0)   | 5 (4, 7)       | 0.9 (0.6, 1.3) | 8.0 (5.5, 10.4)   | 0.2 (0.1, 0.3) | 1.6 (1.2, 2.0)   |
| Latvia                 | Men   | Ages 45 to 64     | 0.266  | 0.1 (0.1, 0.1) | 28 (26, 30) | 9 (5, 12)   | 3 (2, 4)       | 1 (0, 1) | 12 (8, 16)     | 32 (19, 45)   | 11 (8, 15)     | 2 (1, 4)   | 46 (31, 61)    | 0.6 (0.4, 0.9) | 5.1 (3.5, 6.7)    | 0.2 (0.1, 0.3) | 0.7 (0.5, 0.9)   |
| Latvia                 | Men   | Ages 65 and older | 0.282  | 0.1 (0.0, 0.1) | 28 (26, 29) | 16 (9, 22)  | 4 (3, 5)       | 1 (1, 2) | 21 (14, 28)    | 122 (72, 175) | 30 (20, 39)    | 10 (6, 14) | 162 (106, 220) | 0.3 (0.2, 0.5) | 3.0 (2.0, 3.9)    | 0.1 (0.1, 0.2) | 0.3 (0.2, 0.5)   |
| Latvia                 | Men   | Overall           | 0.717  | 0.1 (0.1, 0.1) | 27 (25, 29) | 25 (15, 35) | 8 (6, 9)       | 2 (1, 3) | 35 (23, 46)    | 35 (21, 49)   | 11 (9, 13)     | 3 (2, 4)   | 48 (32, 64)    | 0.4 (0.2, 0.6) | 4.0 (3.2, 4.7)    | 0.1 (0.1, 0.2) | 0.4 (0.3, 0.6)   |
| Latvia                 | Both  | Overall           | 1.62   | 0.1 (0.1, 0.1) | 27 (25, 29) | 49 (29, 70) | 19 (17, 22)    | 4 (2, 6) | 72 (49, 96)    | 30 (18, 43)   | 12 (10, 14)    | 2 (1, 4)   | 45 (30, 59)    | 0.3 (0.2, 0.4) | 3.3 (2.8, 3.8)    | 0.2 (0.1, 0.2) | 0.4 (0.2, 0.5)   |
| Lebanon                | Women | Ages 20 to 44     | 0.366  | 0.9 (0.7, 1.1) | 26 (24, 27) | 2 (1, 2)    | 3 (2, 3)       | 0 (0, 1) | 5 (3, 6)       | 2 (1, 3)      | 4 (3, 5)       | 1 (0, 1)   | 7 (5, 9)       | 2.5 (1.5, 3.6) | 18.3 (13.1, 23.5) | 0.5 (0.3, 0.8) | 2.4 (1.8, 3.1)   |
| Lebanon                | Women | Ages 45 to 64     | 0.425  | 0.5 (0.4, 0.6) | 30 (28, 33) | 6 (4, 9)    | 11 (8, 15)     | 1 (1, 2) | 18 (13, 23)    | 14 (9, 20)    | 26 (18, 34)    | 3 (2, 5)   | 43 (32, 55)    | 1.3 (0.8, 1.9) | 9.9 (7.0, 13.1)   | 0.4 (0.2, 0.6) | 1.9 (1.4, 2.4)   |
| Lebanon                | Women | Ages 65 and older | 0.485  | 0.3 (0.3, 0.4) | 30 (28, 32) | 16 (10, 23) | 20 (15, 26)    | 1 (1, 2) | 38 (28, 49)    | 98 (58, 141)  | 123 (90, 157)  | 8 (5, 12)  | 229 (168, 297) | 0.6 (0.3, 0.8) | 4.9 (3.6, 6.3)    | 0.3 (0.2, 0.5) | 1.0 (0.7, 1.3)   |
| Lebanon                | Women | Overall           | 1.28   | 0.6 (0.4, 0.7) | 28 (26, 30) | 24 (14, 34) | 34 (27, 41)    | 3 (2, 5) | 61 (46, 76)    | 19 (11, 27)   | 27 (21, 32)    | 2 (1, 4)   | 48 (36, 60)    | 0.7 (0.4, 1.0) | 6.3 (5.1, 7.5)    | 0.4 (0.2, 0.5) | 1.2 (0.9, 1.5)   |
| Lebanon                | Men   | Ages 20 to 44     | 0.357  | 1.0 (0.7, 1.2) | 26 (25, 28) | 5 (3, 7)    | 3 (3, 4)       | 0 (0, 0) | 9 (6, 11)      | 8 (5, 11)     | 5 (4, 7)       | 0 (0, 0)   | 14 (10, 17)    | 2.5 (1.6, 3.5) | 19.4 (14.2, 24.1) | 0.2 (0.1, 0.4) | 3.4 (2.5, 4.4)   |
| Lebanon                | Men   | Ages 45 to 64     | 0.36   | 0.5 (0.4, 0.6) | 28 (27, 30) | 11 (7, 16)  | 11 (7, 14)     | 0 (0, 1) | 22 (16, 28)    | 31 (18, 43)   | 30 (21, 39)    | 1 (1, 2)   | 62 (45, 79)    | 1.3 (0.8, 1.8) | 9.9 (6.8, 13.0)   | 0.2 (0.1, 0.3) | 2.0 (1.5, 2.6)   |
| Lebanon                | Men   | Ages 65 and older | 0.429  | 0.4 (0.3, 0.4) | 27 (26, 29) | 19 (11, 27) | 40 (27, 52)    | 1 (0, 1) | 59 (43, 75)    | 130 (78, 190) | 278 (193, 362) | 6 (3, 8)   | 414 (305, 528) | 0.6 (0.4, 0.9) | 5.5 (3.8, 7.2)    | 0.2 (0.1, 0.2) | 1.5 (1.1, 2.0)   |
| Lebanon                | Men   | Overall           | 1.15   | 0.6 (0.5, 0.8) | 27 (26, 29) | 35 (21, 49) | 54 (42, 66)    | 1 (1, 2) | 90 (69, 113)   | 30 (18, 43)   | 47 (36, 58)    | 1 (1, 2)   | 78 (61, 99)    | 0.9 (0.5, 1.2) | 6.4 (4.9, 7.8)    | 0.2 (0.1, 0.3) | 1.7 (1.3, 2.2)   |
| Lebanon                | Both  | Overall           | 2.42   | 0.6 (0.5, 0.7) | 28 (26, 30) | 59 (36, 82) | 88 (73, 103)   | 5 (3, 7) | 151 (118, 185) | 24 (15, 34)   | 36 (30, 42)    | 2 (1, 3)   | 62 (49, 77)    | 0.8 (0.5, 1.1) | 6.3 (5.3, 7.4)    | 0.3 (0.2, 0.5) | 1.5 (1.2, 1.8)   |
| Lesotho                | Women | Ages 20 to 44     | 0.177  | 0.6 (0.2, 1.1) | 26 (25, 27) | 1 (1, 2)    | 12 (9, 15)     | 0 (0, 0) | 14 (11, 17)    | 5 (3, 8)      | 47 (35, 58)    | 1 (0, 1)   | 53 (40, 65)    | 2.3 (1.4, 3.7) | 15.9 (12.0, 19.8) | 0.7 (0.4, 1.0) | 10.0 (7.6, 12.4) |
| Lesotho                | Women | Ages 45 to 64     | 0.129  | 0.3 (0.1, 0.5) | 28 (26, 30) | 2 (1, 3)    | 22 (14, 29)    | 0 (0, 1) | 24 (16, 31)    | 15 (8, 23)    | 167 (109, 225) | 3 (2, 5)   | 186 (126, 244) | 1.2 (0.7, 1.8) | 7.7 (5.0, 10.4)   | 0.5 (0.3, 0.8) | 5.6 (3.8, 7.3)   |
| Lesotho                | Women | Ages 65 and older | 0.143  | 0.2 (0.1, 0.4) | 26 (22, 30) | 5 (3, 7)    | 31 (21, 41)    | 1 (0, 1) | 36 (26, 46)    | 83 (50, 119)  | 565 (389, 742) | 12 (7, 18) | 661 (478, 844) | 0.6 (0.3, 0.8) | 4.4 (3.0, 5.8)    | 0.5 (0.3, 0.7) | 2.5 (1.8, 3.3)   |
| Lesotho                | Women | Overall           | 0.449  | 0.4 (0.1, 0.7) | 27 (24, 29) | 8 (5, 11)   | 65 (52, 78)    | 1 (1, 2) | 74 (60, 88)    | 18 (11, 25)   | 145 (117, 173) | 3 (2, 4)   | 165 (133, 197) | 0.8 (0.5, 1.1) | 6.1 (4.9, 7.3)    | 0.5 (0.3, 0.7) | 3.7 (3.0, 4.4)   |
| Lesotho                | Men   | Ages 20 to 44     | 0.195  | 0.7 (0.2, 1.2) | 22 (19, 24) | 1 (0, 1)    | 8 (5, 10)      | 0 (0, 0) | 8 (6, 11)      | 2 (1, 4)      | 27 (18, 35)    | 0 (0, 0)   | 29 (20, 38)    | 1.0 (0.5, 1.6) | 13.2 (9.0, 17.3)  | 0.4 (0.2, 0.7) | 7.0 (4.9, 9.1)   |
| Lesotho                | Men   | Ages 45 to 64     | 0.0835 | 0.3 (0.1, 0.6) | 22 (20, 25) | 1 (1, 2)    | 13 (9, 18)     | 0 (0, 0) | 15 (10, 19)    | 13 (6, 20)    | 159 (104, 212) | 4 (2, 5)   | 175 (118, 229) | 0.5 (0.3, 0.8) | 7.5 (4.9, 10.0)   | 0.4 (0.2, 0.6) | 3.6 (2.4, 4.7)   |
| Lesotho                | Men   | Ages 65 and older | 0.125  | 0.2 (0.1, 0.4) | 22 (18, 25) | 2 (1, 2)    | 14 (10, 19)    | 0 (0, 1) | 16 (11, 21)    | 42 (21, 65)   | 372 (252, 494) | 10 (5, 15) | 424 (294, 552) | 0.3 (0.1, 0.4) | 4.2 (2.9, 5.6)    | 0.3 (0.2, 0.5) | 1.7 (1.2, 2.2)   |
| Lesotho                | Men   | Overall           | 0.403  | 0.4 (0.1, 0.7) | 22 (19, 25) | 3 (2, 5)    | 35 (28, 42)    | 1 (0, 1) | 39 (31, 46)    | 8 (4, 12)     | 87 (69, 104)   | 2 (1, 3)   | 97 (78, 115)   | 0.4 (0.2, 0.6) | 6.1 (4.8, 7.3)    | 0.3 (0.2, 0.5) | 2.6 (2.1, 3.1)   |
| Lesotho                | Both  | Overall           | 0.852  | 0.4 (0.1, 0.7) | 24 (22, 27) | 11 (8, 15)  | 100 (86, 115)  | 2 (1, 3) | 113 (98, 130)  | 13 (9, 18)    | 117 (101, 135) | 2 (2, 3)   | 133 (115, 153) | 0.6 (0.4, 0.8) | 6.1 (5.2, 7.0)    | 0.4 (0.3, 0.6) | 3.2 (2.8, 3.7)   |
| Liberia                | Women | Ages 20 to 44     | 0.291  | 0.2 (0.1, 0.4) | 23 (22, 24) | 0 (0, 1)    | 5 (4, 6)       | 0 (0, 0) | 5 (4, 7)       | 1 (0, 1)      | 10 (7, 13)     | 0 (0, 0)   | 11 (8, 14)     | 0.6 (0.3, 0.9) | 8.8 (6.4, 11.2)   | 0.1 (0.1, 0.2) | 4.2 (3.1, 5.3)   |
| Liberia                | Women | Ages 45 to 64     | 0.207  | 0.1 (0.0, 0.2) | 24 (23, 25) | 1 (0, 1)    | 9 (6, 12)      | 0 (0, 0) | 10 (7, 13)     | 4 (2, 6)      | 44 (29, 59)    | 0 (0, 1)   | 48 (33, 63)    | 0.3 (0.2, 0.5) | 5.3 (3.4, 7.0)    | 0.1 (0.1, 0.2) | 2.3 (1.6, 3.0)   |
| Liberia                | Women | Ages 65 and older | 0.25   | 0.1 (0.0, 0.1) | 23 (19, 26) | 1 (1, 2)    | 10 (6, 13)     | 0 (0, 0) | 11 (7, 15)     | 19 (10, 29)   | 161 (103, 217) | 1 (0, 1)   | 180 (121, 239) | 0.2 (0.1, 0.3) | 3.2 (2.1, 4.4)    | 0.1 (0.1, 0.2) | 1.2 (0.8, 1.6)   |
| Liberia                | Women | Overall           | 0.749  | 0.2 (0.0, 0.3) | 23 (21, 25) | 2 (1, 4)    | 24 (19, 29)    | 0 (0, 0) | 26 (21, 32)    | 3 (2, 5)      | 32 (26, 39)    | 0 (0, 0)   | 35 (28, 43)    | 0.3 (0.1, 0.4) | 4.5 (3.6, 5.4)    | 0.1 (0.1, 0.2) | 1.8 (1.5, 2.2)   |
| Liberia                | Men   | Ages 20 to 44     | 0.298  | 0.3 (0.1, 0.5) | 22 (19, 24) | 0 (0, 0)    | 3 (2, 4)       | 0 (0, 0) | 3 (2, 4)       | 1 (0, 1)      | 3 (3, 7)       | 0 (0, 0)   | 6 (4, 8)       | 0.5 (0.2, 0.7) | 7.0 (4.7, 9.5)    | 0.1 (0.0, 0.1) | 3.0 (2.1, 4.0)   |
| Liberia                | Men   | Ages 45 to 64     | 0.189  | 0.1 (0.0, 0.2) | 22 (20, 25) | 1 (0, 1)    | 7 (4, 9)       | 0 (0, 0) | 7 (5, 9)       | 3 (2, 5)      | 35 (23, 46)    | 0 (0, 0)   | 38 (26, 49)    | 0.3 (0.2, 0.5) | 5.3 (3.5, 7.1)    | 0.1 (0.1, 0.2) | 2.5 (1.7, 3.2)   |
| Liberia                | Men   | Ages 65 and older | 0.243  | 0.1 (0.0, 0.2) | 22 (18, 25) | 1 (0, 1)    | 6 (3, 7)       | 0 (0, 0) | 6 (4, 8)       | 12 (6, 17)    | 112 (68, 151)  | 1 (0, 1)   | 124 (81, 165)  | 0.2 (0.1, 0.3) | 3.3 (2.0, 4.5)    | 0.1 (0.0, 0.2) | 1.3 (0.9, 1.8)   |
| Liberia                | Men   | Overall           | 0.73   | 0.2 (0.0, 0.3) | 22 (19, 25) | 1 (1, 2)    | 15 (11, 18)    | 0 (0, 0) | 16 (13, 19)    | 2 (1, 3)      | 20 (16, 24)    | 0 (0, 0)   | 22 (17, 26)    | 0.3 (0.1, 0.4) | 4.5 (3.5, 5.5)    | 0.1 (0.1, 0.2) | 1.9 (1.5, 2.3)   |
| Liberia                | Both  | Overall           | 1.48   | 0.2 (0.0, 0.3) | 22 (20, 25) | 4 (2, 6)    | 38 (33, 44)    | 0 (0, 0) | 43 (36, 49)    | 3 (1, 4)      | 26 (22, 30)    | 0 (0, 0)   | 29 (24, 33)    | 0.7 (0.4, 1.0) | 5.6 (3.8, 5.2)    | 0.1 (0.1, 0.2) | 1.8 (1.6, 2.1)   |
| Libyan Arab Jamahiriya | Women | Ages 20 to 44     | 0.636  | 0.6 (0.2, 0.9) | 27 (26, 28) | 3 (2, 5)    | 9 (6, 12)      | 0 (0, 1) | 13 (10, 16)    | 3 (2, 5)      | 8 (6, 11)      | 0 (0, 1)   | 12 (9, 15)     | 1.8 (1.1, 2.7) | 13.7 (9.5, 17.6)  | 0.4 (0.2, 0.6) | 3.4 (2.5, 4.3)   |
| Libyan Arab Jamahiriya | Women | Ages 45 to 64     | 0.416  | 0.3 (0.1, 0.5) | 32 (31, 33) | 8 (4, 11)   | 27 (19, 35)    | 1 (0, 1) | 35 (26, 45)    | 18 (11, 26)   | 65 (46, 85)    | 2 (1, 2)   | 84 (62, 108)   | 1.1 (0.6, 1.5) | 7.9 (5.6, 10.4)   | 0.3 (0.2, 0.5) | 2.9 (2.2, 3.7)   |
| Libyan Arab Jamahiriya | Women | Ages 65 and older | 0.59   | 0.2 (0.1, 0.4) | 30 (27, 33) | 13 (8, 19)  | 39 (28, 50)    | 1 (0, 1) | 53 (40, 66)    | 92 (55, 135)  | 277 (201, 354) | 4 (2, 5)   | 374 (282, 469) | 0.7 (0.3, 0.7) | 3.9 (2.8, 5.0)    | 0.3 (0.2, 0.4) | 1.4 (1.1, 1.8)   |
| Libyan Arab Jamahiriya | Women | Overall           | 1.64   | 0.4 (0.1, 0.6) | 30 (28, 31) | 24 (14, 34) | 75 (61, 89)    | 2 (1, 2) | 101 (80, 122)  | 15 (9, 21)    | 46 (37, 54)    | 1 (1, 1)   | 61 (49, 74)    | 0.5 (0.4, 0.9) | 5.3 (4.3, 6.3)    | 0.3 (0.2, 0.5) | 1.9 (1.5, 2.3)   |
| Libyan Arab Jamahiriya | Men   | Ages 20 to 44     | 0.641  | 0.6 (0.2, 1.0) | 26 (25, 27) | 7 (4, 10)   | 9 (6, 12)      | 0 (0, 0) | 16 (12, 20)    | 6 (4, 9)      | 8 (6, 11)      | 0 (0, 0)   | 15 (11, 19)    | 1.9 (1.1, 2.6) | 14.3 (10.2, 18.4) | 0.2 (0.1, 0.4) | 3.4 (2.6, 4.3)   |
| Libyan Arab Jamahiriya | Men   | Ages 45 to 64     | 0.452  | 0.3 (0.1, 0.5) | 28 (27, 29) | 15 (9, 21)  | 28 (20, 37)    | 0 (0, 1) | 43 (32, 54)    | 32 (19, 46)   | 61 (43, 81)    | 1 (1, 1)   | 94 (70, 120)   | 1.0 (0.6, 1.5) | 7.9 (5.6, 10.4)   | 0.3 (0.1, 0.4) | 2.3 (1.7, 3.0)   |
| Libyan Arab Jamahiriya | Men   | Ages 65 and older | 0.564  | 0.2 (0.1, 0.4) | 26 (25, 28) | 15 (9, 22)  | 33 (23, 44)    | 0 (0, 1) | 49 (36, 62)    | 114 (67, 163) | 251 (175, 328) | 4 (2, 5)   | 368 (274, 467) | 0.5 (0.3, 0.8) | 4.4 (3.1, 5.8)    | 0.3 (0.2, 0.4) | 1.3 (1.0, 1.7)   |
| Libyan Arab Jamahiriya | Men   | Overall           | 1.66   | 0.4 (0.1, 0.7) | 26 (25, 27) | 36 (22, 52) | 70 (57, 83)    | 1 (1, 2) | 107 (85, 132)  | 22 (13, 31)   | 42 (34, 50)    | 1 (0, 1)   | 65 (52, 80)    | 0.8 (0.5, 1.1) | 6.0 (4.8, 7.1)    | 0.3 (0.2, 0.4) | 1.8 (1.4, 2.2)   |
| Libyan Arab Jamahiriya | Both  | Overall           | 3.3    | 0.4 (0.1, 0.6) | 28 (27, 29) | 60 (37, 85) | 145 (124, 165) | 3 (2, 4) | 208 (169, 248) | 18 (11, 26)   | 44 (38, 50)    | 1 (1, 1)   | 63 (51, 75)    | 0.7 (0.4, 1.0) | 5.6 (4.8, 6.4)    | 0.3 (0.2, 0.4) | 1.9 (1.5, 2.2)   |
| Lithuania              | Women | Ages 20 to 44     | 0.23   | 0.4 (0.1, 0.7) | 24 (21, 26) | 0 (0, 0)    | 1 (1, 2)       | 0 (0, 0) | 2 (1, 2)       | 1 (0, 1)      | 2 (2, 3)       | 0 (0, 0)   | 3 (3, 4)       | 1.3 (0.8, 1.8) | 11.4 (8.0, 14.7)  | 0.3 (0.2, 0.4) | 1.9 (1.4, 2.4)   |
| Lithuania              | Women | Ages 45 to 64     | 0.467  | 0.2 (0.1, 0.3) | 29 (26, 31) | 4 (3, 6)    | 3 (2, 4)       | 1 (1, 1) | 8 (6, 11)      | 9 (5, 13)     | 7 (5, 9)       | 2 (1, 3)   | 18 (13, 23)    | 0.8 (0.5, 1.2) | 6.5 (4.2, 8.6)    | 0.2 (0.1, 0.4) | 0.8 (0.6, 1.0)   |
| Lithuania              | Women | Ages 65 and older | 0.599  | 0.1 (0.0, 0.2) | 29 (27, 32) | 33 (17, 50) | 6 (5, 8)       | 2 (1, 4) | 41 (25, 60)    | 91 (47, 141)  | 18 (13, 23)    | 7 (4, 10)  | 116 (69, 168)  | 0.3 (0.2, 0.5) | 3.3 (2.4, 4.3)    | 0.2 (0.1, 0.3) | 0.3 (0.2, 0.4)   |
| Lithuania              | Women | Overall           | 1.3    | 0.3 (0.1, 0.4) | 27 (25, 30) | 37 (20, 56) | 11 (9, 13)     | 4 (2, 5) | 52 (33, 72)    | 29 (15, 44)   | 8 (7, 10)      | 3 (2, 4)   | 40 (25, 56)    | 0.3 (0.2, 0.5) | 4.3 (3.5, 5.2)    | 0.2 (0.1, 0.3) | 0.4 (0.2, 0.5)   |
| Lithuania              | Men   | Ages 20 to 44     | 0.237  | 0.4 (0.1, 0.7) | 26 (24, 27) | 2 (1, 3)    | 3 (2, 4)       | 0 (0, 0) | 5 (4, 7)       | 5 (3, 7)      | 7 (5, 9)       | 0 (0, 0)   | 12 (9, 15)     | 1.4 (0.9, 2.0) | 12.1 (8.4, 15.4)  | 0.3 (0.2, 0.5) | 2.6 (1.9, 3.2)   |
| Lithuania              | Men   | Ages 45 to 64     | 0.389  | 0.2 (0.1, 0.4) | 28 (26, 30) | 15 (9, 21)  | 5 (3, 6)       | 1 (1, 2) | 21 (14, 28)    | 38 (22, 53)   | 12 (8, 16)     | 4 (2, 5)   | 53 (36, 71)    | 0.9 (0.5, 1.2) | 7.0 (4.7, 9.1)    | 0.3 (0.2, 0.4) | 0.9 (0.6, 1.2)   |
| Lithuania              | Men   | Ages 65 and older | 0.414  | 0.2 (0.0, 0.3) | 2           |             |                |          |                |               |                |            |                |                |                   |                |                  |

|                                         |       |                   |        |                |             |                |                   |             |                   |                |                |            |                |                 |                   |                |                   |
|-----------------------------------------|-------|-------------------|--------|----------------|-------------|----------------|-------------------|-------------|-------------------|----------------|----------------|------------|----------------|-----------------|-------------------|----------------|-------------------|
| Macedonia (Former Yugoslav Republic of) | Men   | Overall           | 0.682  | 0.3 (0.1, 0.5) | 26 (23, 29) | 21 (13, 30)    | 24 (18, 29)       | 1 (1, 2)    | 46 (35, 58)       | 31 (19, 44)    | 35 (27, 42)    | 2 (1, 3)   | 68 (51, 85)    | 0.5 (0.3, 0.7)  | 4.7 (3.6, 5.7)    | 0.1 (0.1, 0.2) | 0.9 (0.7, 1.1)    |
|                                         | Both  | Overall           | 1.38   | 0.3 (0.1, 0.5) | 26 (23, 29) | 40 (24, 56)    | 52 (43, 60)       | 3 (2, 4)    | 94 (73, 117)      | 29 (17, 40)    | 37 (31, 43)    | 2 (1, 3)   | 68 (53, 85)    | 0.5 (0.3, 0.6)  | 4.3 (3.6, 5.0)    | 0.2 (0.1, 0.3) | 0.8 (0.7, 1.0)    |
| <b>16</b>                               |       |                   |        |                |             |                |                   |             |                   |                |                |            |                |                 |                   |                |                   |
| Madagascar                              | Women | Ages 20 to 44     | 1.41   | 0.3 (0.1, 0.5) | 21 (20, 21) | 0 (0, 0)       | 0 (0, 0)          | 0 (0, 0)    | 0 (0, 0)          | 0 (0, 0)       | 0 (0, 0)       | 0 (0, 0)   | 0 (0, 0)       | 0.0 (0.0, 0.0)  | 0.0 (0.0, 0.0)    | 0.0 (0.0, 0.0) | 0.0 (0.0, 0.0)    |
| Madagascar                              | Women | Ages 45 to 64     | 1.11   | 0.1 (0.0, 0.3) | 21 (20, 22) | 0 (0, 0)       | 0 (0, 0)          | 0 (0, 0)    | 0 (0, 0)          | 0 (0, 0)       | 0 (0, 0)       | 0 (0, 0)   | 0 (0, 0)       | 0.0 (0.0, 0.0)  | 0.0 (0.0, 0.0)    | 0.0 (0.0, 0.0) | 0.0 (0.0, 0.0)    |
| Madagascar                              | Women | Ages 65 and older | 1.38   | 0.1 (0.0, 0.2) | 20 (19, 22) | 0 (0, 0)       | 0 (0, 0)          | 0 (0, 0)    | 0 (0, 0)          | 0 (0, 0)       | 0 (0, 0)       | 0 (0, 0)   | 0 (0, 0)       | 0.0 (0.0, 0.0)  | 0.0 (0.0, 0.0)    | 0.0 (0.0, 0.0) | 0.0 (0.0, 0.0)    |
| Madagascar                              | Women | Overall           | 3.89   | 0.2 (0.1, 0.3) | 21 (20, 22) | 0 (0, 0)       | 0 (0, 0)          | 0 (0, 0)    | 0 (0, 0)          | 0 (0, 0)       | 0 (0, 0)       | 0 (0, 0)   | 0 (0, 0)       | 0.0 (0.0, 0.0)  | 0.0 (0.0, 0.0)    | 0.0 (0.0, 0.0) | 0.0 (0.0, 0.0)    |
| Madagascar                              | Men   | Ages 20 to 44     | 1.39   | 0.3 (0.1, 0.6) | 21 (20, 22) | 5 (2, 7)       | 20 (13, 27)       | 0 (0, 0)    | 25 (17, 33)       | 2 (1, 3)       | 8 (5, 11)      | 0 (0, 0)   | 10 (7, 14)     | 0.5 (0.3, 0.8)  | 8.6 (5.6, 11.5)   | 0.3 (0.1, 0.5) | 2.2 (1.5, 2.8)    |
| Madagascar                              | Men   | Ages 45 to 64     | 1.07   | 0.2 (0.0, 0.3) | 22 (20, 23) | 9 (4, 13)      | 42 (27, 56)       | 1 (0, 1)    | 51 (36, 67)       | 8 (4, 12)      | 39 (26, 53)    | 1 (0, 1)   | 48 (33, 62)    | 0.3 (0.2, 0.5)  | 5.6 (3.7, 7.5)    | 0.3 (0.1, 0.4) | 1.5 (1.0, 1.9)    |
| Madagascar                              | Men   | Ages 65 and older | 1.32   | 0.1 (0.0, 0.2) | 21 (20, 23) | 7 (4, 11)      | 36 (23, 50)       | 1 (0, 1)    | 44 (30, 57)       | 23 (12, 34)    | 118 (76, 163)  | 2 (1, 3)   | 143 (97, 188)  | 0.1 (0.1, 0.2)  | 2.8 (1.8, 3.8)    | 0.2 (0.1, 0.3) | 0.7 (0.5, 0.9)    |
| Madagascar                              | Men   | Overall           | 3.79   | 0.2 (0.1, 0.4) | 21 (20, 23) | 20 (10, 30)    | 98 (78, 119)      | 2 (1, 2)    | 120 (95, 146)     | 5 (3, 8)       | 26 (21, 31)    | 0 (0, 1)   | 32 (25, 38)    | 0.2 (0.1, 0.4)  | 4.3 (3.4, 5.2)    | 0.2 (0.1, 0.4) | 1.1 (0.9, 1.3)    |
| Madagascar                              | Both  | Overall           | 7.68   | 0.2 (0.1, 0.3) | 21 (20, 22) | 20 (10, 30)    | 98 (78, 119)      | 2 (1, 2)    | 120 (95, 146)     | 3 (1, 4)       | 13 (10, 15)    | 0 (0, 0)   | 16 (12, 19)    | 0.1 (0.1, 0.2)  | 2.3 (1.9, 2.8)    | 0.1 (0.0, 0.1) | 0.5 (0.4, 0.6)    |
| Malawi                                  | Women | Ages 20 to 44     | 1.01   | 0.9 (0.2, 1.5) | 23 (22, 24) | 6 (3, 10)      | 21 (15, 27)       | 0 (0, 0)    | 28 (21, 35)       | 4 (2, 6)       | 14 (10, 17)    | 0 (0, 0)   | 18 (13, 22)    | 1.3 (0.6, 2.1)  | 17.7 (12.8, 22.5) | 0.5 (0.2, 0.7) | 4.3 (3.2, 5.4)    |
| Malawi                                  | Women | Ages 45 to 64     | 0.725  | 0.4 (0.1, 0.7) | 23 (22, 24) | 9 (5, 15)      | 40 (26, 55)       | 1 (0, 2)    | 51 (35, 66)       | 13 (7, 20)     | 56 (36, 76)    | 1 (1, 2)   | 70 (48, 91)    | 0.6 (0.3, 0.9)  | 8.3 (5.4, 11.3)   | 0.4 (0.2, 0.6) | 2.2 (1.5, 2.8)    |
| Malawi                                  | Women | Ages 65 and older | 0.821  | 0.3 (0.1, 0.5) | 22 (20, 23) | 14 (7, 21)     | 52 (36, 72)       | 1 (0, 1)    | 67 (49, 88)       | 55 (28, 85)    | 211 (143, 288) | 3 (1, 4)   | 268 (196, 354) | 0.3 (0.2, 0.5)  | 4.8 (3.3, 6.6)    | 0.4 (0.2, 0.6) | 1.1 (0.8, 1.5)    |
| Malawi                                  | Women | Overall           | 2.56   | 0.5 (0.1, 1.0) | 23 (22, 24) | 29 (15, 44)    | 114 (91, 138)     | 2 (1, 3)    | 145 (115, 174)    | 11 (6, 17)     | 45 (36, 54)    | 1 (0, 1)   | 57 (45, 68)    | 0.4 (0.2, 0.7)  | 6.8 (5.4, 8.2)    | 0.4 (0.2, 0.6) | 1.7 (1.3, 2.0)    |
| Malawi                                  | Men   | Ages 20 to 44     | 1.04   | 0.9 (0.3, 1.5) | 22 (21, 23) | 5 (2, 7)       | 51 (37, 64)       | 1 (0, 1)    | 56 (41, 70)       | 3 (1, 4)       | 31 (23, 39)    | 0 (0, 1)   | 34 (25, 43)    | 1.3 (0.7, 1.9)  | 18.6 (13.6, 23.5) | 0.8 (0.4, 1.3) | 8.3 (6.2, 10.4)   |
| Malawi                                  | Men   | Ages 45 to 64     | 0.624  | 0.4 (0.1, 0.8) | 22 (21, 23) | 6 (3, 9)       | 59 (40, 79)       | 2 (1, 3)    | 67 (47, 87)       | 10 (5, 15)     | 95 (64, 127)   | 3 (1, 4)   | 107 (75, 140)  | 0.5 (0.3, 0.8)  | 8.8 (5.9, 11.7)   | 0.6 (0.3, 0.9) | 3.4 (2.4, 4.5)    |
| Malawi                                  | Men   | Ages 65 and older | 0.814  | 0.3 (0.1, 0.6) | 21 (20, 22) | 6 (3, 9)       | 53 (34, 72)       | 1 (0, 1)    | 60 (41, 79)       | 29 (15, 44)    | 249 (163, 341) | 4 (2, 6)   | 282 (193, 374) | 0.2 (0.1, 0.4)  | 4.6 (3.0, 6.3)    | 0.4 (0.2, 0.6) | 1.6 (1.1, 2.2)    |
| Malawi                                  | Men   | Overall           | 2.123  | 0.6 (0.2, 1.0) | 22 (21, 23) | 17 (9, 26)     | 163 (130, 194)    | 3 (2, 5)    | 183 (149, 217)    | 7 (3, 10)      | 66 (53, 78)    | 1 (1, 2)   | 74 (60, 88)    | 0.4 (0.2, 0.6)  | 7.8 (6.2, 9.3)    | 0.5 (0.3, 0.8) | 2.9 (2.4, 3.5)    |
| Malawi                                  | Both  | Overall           | 5.04   | 0.6 (0.2, 1.0) | 22 (21, 23) | 46 (24, 70)    | 277 (239, 314)    | 5 (3, 8)    | 328 (280, 378)    | 9 (5, 14)      | 55 (48, 62)    | 1 (1, 2)   | 65 (56, 75)    | 0.4 (0.2, 0.7)  | 7.3 (6.3, 8.3)    | 0.5 (0.2, 0.7) | 2.2 (1.9, 2.5)    |
| Malaysia                                | Women | Ages 20 to 44     | 2.21   | 3.7 (2.8, 4.7) | 25 (24, 26) | 18 (11, 26)    | 68 (53, 79)       | 5 (3, 8)    | 91 (72, 108)      | 4 (3, 6)       | 17 (13, 19)    | 1 (1, 2)   | 23 (18, 27)    | 8.5 (5.1, 12.2) | 46.7 (36.2, 54.2) | 2.0 (1.1, 2.9) | 14.5 (11.4, 17.1) |
| Malaysia                                | Women | Ages 45 to 64     | 2.55   | 2.0 (1.5, 2.5) | 27 (25, 28) | 108 (64, 151)  | 395 (291, 491)    | 18 (10, 26) | 521 (396, 642)    | 42 (25, 59)    | 155 (114, 192) | 7 (4, 10)  | 204 (155, 251) | 4.0 (2.3, 5.5)  | 27.2 (20.0, 33.7) | 1.3 (0.7, 1.9) | 9.8 (7.5, 12.1)   |
| Malaysia                                | Women | Ages 65 and older | 2.54   | 1.4 (1.1, 1.7) | 24 (23, 26) | 131 (87, 179)  | 382 (270, 491)    | 9 (6, 12)   | 522 (391, 647)    | 190 (126, 258) | 552 (389, 710) | 12 (8, 17) | 754 (565, 935) | 1.3 (0.8, 1.7)  | 13.3 (9.4, 17.1)  | 0.6 (0.4, 0.9) | 3.6 (2.7, 4.5)    |
| Malaysia                                | Women | Overall           | 7.3    | 2.4 (1.8, 3.0) | 25 (24, 26) | 257 (166, 350) | 846 (694, 999)    | 32 (20, 45) | 1134 (935, 1337)  | 35 (23, 48)    | 116 (95, 137)  | 4 (3, 6)   | 155 (128, 183) | 1.9 (1.2, 2.6)  | 18.6 (15.5, 22.3) | 1.1 (0.7, 1.5) | 5.6 (4.6, 6.6)    |
| Malaysia                                | Men   | Ages 20 to 44     | 2.24   | 3.9 (2.9, 4.9) | 25 (24, 25) | 56 (36, 78)    | 86 (68, 99)       | 2 (1, 3)    | 144 (115, 174)    | 14 (9, 19)     | 21 (17, 24)    | 1 (0, 1)   | 35 (28, 42)    | 7.2 (4.6, 10.0) | 46.9 (37.3, 53.8) | 1.1 (0.7, 1.6) | 13.6 (10.8, 16.4) |
| Malaysia                                | Men   | Ages 45 to 64     | 2.6    | 2.1 (1.6, 2.7) | 25 (25, 26) | 293 (176, 416) | 482 (354, 598)    | 14 (8, 20)  | 789 (582, 981)    | 113 (68, 160)  | 185 (136, 230) | 5 (3, 8)   | 303 (223, 377) | 4.2 (2.5, 6.0)  | 28.4 (20.8, 35.3) | 1.1 (0.6, 1.6) | 8.5 (6.2, 10.5)   |
| Malaysia                                | Men   | Ages 65 and older | 2.53   | 1.5 (1.1, 1.9) | 24 (23, 25) | 101 (52, 153)  | 305 (209, 393)    | 7 (4, 11)   | 413 (300, 521)    | 153 (78, 231)  | 461 (316, 594) | 11 (5, 16) | 624 (454, 787) | 0.8 (0.4, 1.3)  | 13.8 (9.5, 17.8)  | 0.3 (0.2, 0.5) | 2.7 (1.9, 3.4)    |
| Malaysia                                | Men   | Overall           | 7.38   | 2.6 (1.9, 3.2) | 24 (24, 25) | 451 (305, 598) | 873 (709, 1027)   | 23 (16, 31) | 1347 (1091, 1601) | 61 (41, 81)    | 118 (96, 139)  | 3 (2, 4)   | 183 (148, 217) | 2.3 (1.6, 3.0)  | 21.3 (17.3, 25.1) | 0.7 (0.4, 0.9) | 5.2 (4.2, 6.2)    |
| Malaysia                                | Both  | Overall           | 14.7   | 2.5 (1.9, 3.1) | 25 (24, 26) | 707 (465, 952) | 1719 (1491, 1946) | 55 (36, 75) | 2481 (2088, 2883) | 48 (32, 65)    | 117 (102, 133) | 4 (2, 5)   | 169 (142, 196) | 2.1 (1.4, 2.9)  | 20.1 (17.4, 22.7) | 0.9 (0.6, 1.3) | 5.4 (4.5, 6.3)    |
| Maldives                                | Women | Ages 20 to 44     | 0.0298 | 0.7 (0.2, 1.2) | 24 (22, 25) | 0 (0, 0)       | 0 (0, 0)          | 0 (0, 0)    | 0 (0, 0)          | 0 (0, 0)       | 3 (2, 4)       | 0 (0, 0)   | 3 (3, 4)       | 1.7 (1.1, 2.5)  | 15.4 (11.0, 19.7) | 0.4 (0.3, 0.5) | 5.3 (3.9, 6.6)    |
| Maldives                                | Women | Ages 45 to 64     | 0.0205 | 0.4 (0.1, 0.6) | 29 (27, 32) | 0 (0, 0)       | 0 (0, 0)          | 0 (0, 0)    | 0 (0, 0)          | 4 (2, 6)       | 14 (10, 18)    | 1 (0, 1)   | 18 (14, 24)    | 1.2 (0.7, 1.7)  | 9.1 (6.5, 11.8)   | 0.5 (0.3, 0.7) | 2.9 (2.2, 3.7)    |
| Maldives                                | Women | Ages 65 and older | 0.0276 | 0.3 (0.1, 0.4) | 30 (26, 34) | 0 (0, 0)       | 0 (0, 1)          | 0 (0, 0)    | 1 (1, 1)          | 33 (20, 47)    | 59 (41, 76)    | 3 (2, 5)   | 95 (71, 120)   | 0.5 (0.3, 0.7)  | 4.4 (3.1, 5.7)    | 0.4 (0.2, 0.6) | 1.1 (0.8, 1.4)    |
| Maldives                                | Women | Overall           | 0.0779 | 0.4 (0.1, 0.8) | 27 (25, 30) | 0 (0, 0)       | 1 (1, 1)          | 0 (0, 0)    | 1 (1, 2)          | 4 (3, 6)       | 11 (9, 13)     | 1 (0, 1)   | 16 (13, 20)    | 0.6 (0.4, 0.9)  | 6.2 (5.0, 7.4)    | 0.4 (0.2, 0.6) | 1.6 (1.3, 1.9)    |
| Maldives                                | Men   | Ages 20 to 44     | 0.0278 | 0.7 (0.2, 1.3) | 23 (20, 26) | 0 (0, 0)       | 0 (0, 0)          | 0 (0, 0)    | 0 (0, 0)          | 1 (0, 1)       | 7 (5, 9)       | 0 (0, 0)   | 8 (6, 9)       | 1.1 (0.6, 1.6)  | 16.5 (12.1, 20.6) | 0.2 (0.1, 0.3) | 6.1 (4.6, 7.5)    |
| Maldives                                | Men   | Ages 45 to 64     | 0.021  | 0.4 (0.1, 0.7) | 24 (21, 27) | 0 (0, 0)       | 0 (0, 0)          | 0 (0, 0)    | 0 (0, 0)          | 4 (2, 6)       | 13 (9, 18)     | 1 (0, 1)   | 18 (13, 23)    | 0.5 (0.3, 0.8)  | 8.6 (5.6, 11.5)   | 0.2 (0.1, 0.3) | 1.4 (1.0, 1.8)    |
| Maldives                                | Men   | Ages 65 and older | 0.0279 | 0.3 (0.1, 0.5) | 23 (20, 26) | 0 (0, 0)       | 0 (0, 1)          | 0 (0, 0)    | 1 (0, 1)          | 24 (12, 36)    | 50 (35, 65)    | 2 (1, 3)   | 76 (55, 96)    | 0.2 (0.1, 0.3)  | 4.1 (2.9, 5.3)    | 0.1 (0.1, 0.2) | 0.6 (0.4, 0.7)    |
| Maldives                                | Men   | Overall           | 0.0767 | 0.5 (0.2, 0.8) | 23 (20, 26) | 0 (0, 0)       | 1 (1, 1)          | 0 (0, 0)    | 1 (1, 2)          | 4 (2, 6)       | 14 (11, 16)    | 0 (0, 1)   | 18 (15, 22)    | 0.3 (0.1, 0.4)  | 6.6 (5.3, 7.7)    | 0.1 (0.1, 0.2) | 0.9 (0.7, 1.1)    |
| Maldives                                | Both  | Overall           | 0.155  | 0.5 (0.1, 0.8) | 25 (22, 28) | 1 (0, 1)       | 2 (2, 2)          | 0 (0, 0)    | 3 (2, 3)          | 4 (3, 6)       | 13 (11, 14)    | 1 (0, 1)   | 17 (15, 20)    | 0.4 (0.3, 0.5)  | 6.4 (5.5, 7.3)    | 0.2 (0.2, 0.3) | 1.1 (1.0, 1.3)    |
| Mali                                    | Women | Ages 20 to 44     | 1.07   | 0.4 (0.1, 0.7) | 23 (22, 24) | 3 (2, 5)       | 28 (20, 36)       | 0 (0, 0)    | 32 (24, 41)       | 2 (1, 3)       | 16 (12, 21)    | 0 (0, 0)   | 18 (14, 23)    | 0.8 (0.4, 1.2)  | 11.4 (8.2, 14.7)  | 0.2 (0.1, 0.2) | 4.0 (3.0, 5.1)    |
| Mali                                    | Women | Ages 45 to 64     | 0.693  | 0.2 (0.1, 0.4) | 24 (23, 25) | 4 (2, 7)       | 41 (27, 55)       | 0 (0, 1)    | 46 (33, 60)       | 6 (3, 10)      | 60 (39, 79)    | 1 (0, 1)   | 67 (47, 87)    | 0.4 (0.2, 0.6)  | 6.2 (4.1, 8.2)    | 0.1 (0.1, 0.2) | 2.4 (1.7, 3.2)    |
| Mali                                    | Women | Ages 65 and older | 0.89   | 0.2 (0.0, 0.3) | 22 (19, 25) | 5 (3, 8)       | 40 (25, 56)       | 0 (0, 0)    | 46 (29, 61)       | 26 (13, 38)    | 202 (125, 281) | 1 (1, 2)   | 228 (146, 308) | 0.2 (0.1, 0.2)  | 3.6 (2.2, 5.0)    | 0.1 (0.1, 0.2) | 1.3 (0.8, 1.8)    |
| Mali                                    | Women | Overall           | 2.65   | 0.3 (0.1, 0.5) | 23 (21, 25) | 13 (7, 20)     | 110 (88, 132)     | 1 (0, 1)    | 124 (100, 148)    | 5 (3, 7)       | 41 (33, 50)    | 0 (0, 0)   | 47 (38, 56)    | 0.3 (0.2, 0.5)  | 5.4 (4.3, 6.5)    | 0.1 (0.1, 0.2) | 2.0 (1.6, 2.4)    |
| Mali                                    | Men   | Ages 20 to 44     | 1.08   | 0.5 (0.1, 0.8) | 22 (20, 23) | 1 (1, 2)       | 13 (9, 17)        | 0 (0, 0)    | 15 (10, 19)       | 1 (0, 1)       | 7 (5, 10)      | 0 (0, 0)   | 8 (6, 11)      | 0.6 (0.3, 0.9)  | 9.4 (6.2, 12.5)   | 0.1 (0.0, 0.2) | 3.5 (2.4, 4.6)    |
| Mali                                    | Men   | Ages 45 to 64     | 0.557  | 0.2 (0.1, 0.4) | 22 (21, 24) | 2 (1, 3)       | 26 (17, 35)       | 0 (0, 0)    | 29 (19, 38)       | 4 (2, 6)       | 47 (31, 63)    | 0 (0, 1)   | 51 (35, 68)    | 0.2 (0.2, 0.6)  | 6.4 (4.2, 8.6)    | 0.2 (0.1, 0.2) | 3.0 (2.0, 3.9)    |
| Mali                                    | Men   | Ages 65 and older | 0.797  | 0.2 (0.1, 0.3) | 22 (19, 24) | 2 (1, 3)       | 23 (14, 31)       | 0 (0, 0)    | 25 (16, 35)       | 16 (8, 25)     | 163 (102, 226) | 1 (1, 2)   | 180 (116, 250) | 0.2 (0.1, 0.3)  | 3.9 (2.5, 5.5)    | 0.1 (0.0, 0.1) | 1.6 (1.0, 2.2)    |
| Mali                                    | Men   | Overall           | 2.44   | 0.3 (0.0, 0.5) | 22 (20, 23) | 6 (3, 9)       | 62 (49, 75)       | 1 (0, 1)    | 68 (54, 82)       | 2 (1, 4)       | 25 (20, 31)    | 0 (0, 0)   | 28 (22, 34)    | 0.3 (0.2, 0.3)  | 5.5 (4.3, 6.7)    | 0.1 (0.1, 0.2) | 2.3 (1.8, 2.8)    |
| Mali                                    | Both  | Overall           | 5.09   | 0.3 (0.1, 0.5) | 22 (21, 24) | 19 (10, 28)    | 172 (146, 199)    | 1 (1, 2)    | 192 (163, 221)    | 4 (2, 6)       | 34 (29, 39)    | 0 (0, 0)   | 38 (32, 43)    | 0.3 (0.2, 0.5)  | 5.4 (4.6, 6.3)    | 0.1 (0.1, 0.2) | 2.1 (1.8, 2.4)    |
| Malta                                   |       |                   |        |                |             |                |                   |             |                   |                |                |            |                |                 |                   |                |                   |



|                                  |       |                   |         |                |             |                   |                      |               |                      |                |                  |               |                   |                 |                   |                |                   |
|----------------------------------|-------|-------------------|---------|----------------|-------------|-------------------|----------------------|---------------|----------------------|----------------|------------------|---------------|-------------------|-----------------|-------------------|----------------|-------------------|
| Mauritania                       | Men   | Ages 20 to 44     | 0.271   | 1.4 (0.4, 2.4) | 22 (21, 23) | 1 (1, 2)          | 7 (5, 9)             | 0 (0, 0)      | 8 (6, 11)            | 2 (1, 3)       | 16 (11, 20)      | 0 (0, 0)      | 18 (13, 23)       | 1.3 (0.7, 2.0)  | 19.5 (13.1, 25.2) | 0.3 (0.2, 0.5) | 7.2 (5.0, 9.1)    |
| Mauritania                       | Men   | Ages 45 to 64     | 0.184   | 0.7 (0.2, 1.2) | 23 (22, 25) | 2 (1, 3)          | 17 (12, 22)          | 0 (0, 0)      | 19 (13, 24)          | 9 (5, 14)      | 91 (63, 119)     | 1 (0, 1)      | 101 (73, 130)     | 0.7 (0.4, 1.1)  | 11.6 (8.0, 15.1)  | 0.3 (0.2, 0.5) | 5.1 (3.7, 6.5)    |
| Mauritania                       | Men   | Ages 65 and older | 0.23    | 0.5 (0.1, 0.9) | 23 (21, 25) | 1 (1, 2)          | 11 (7, 15)           | 0 (0, 0)      | 12 (8, 16)           | 31 (16, 47)    | 283 (174, 388)   | 2 (1, 3)      | 316 (200, 421)    | 0.4 (0.2, 0.6)  | 6.8 (4.2, 9.3)    | 0.2 (0.1, 0.4) | 2.7 (1.7, 3.5)    |
| Mauritania                       | Men   | Overall           | 0.685   | 0.9 (0.2, 1.5) | 23 (21, 25) | 4 (2, 6)          | 35 (28, 42)          | 0 (0, 0)      | 39 (31, 47)          | 6 (3, 9)       | 51 (41, 61)      | 0 (0, 1)      | 57 (46, 68)       | 0.6 (0.3, 0.9)  | 10.2 (8.2, 12.2)  | 0.3 (0.2, 0.4) | 4.2 (3.3, 5.0)    |
| Mauritania                       | Both  | Overall           | 1.39    | 0.8 (0.2, 1.4) | 24 (22, 26) | 14 (10, 19)       | 92 (80, 105)         | 1 (1, 1)      | 107 (93, 123)        | 10 (7, 14)     | 66 (57, 76)      | 1 (1, 1)      | 77 (67, 88)       | 1.0 (0.7, 1.3)  | 10.3 (8.9, 11.8)  | 0.5 (0.3, 0.7) | 4.7 (4.1, 5.4)    |
| Mauritius                        | Women | Ages 20 to 44     | 0.104   | 1.0 (0.3, 1.6) | 25 (23, 26) | 0 (0, 1)          | 3 (2, 5)             | 0 (0, 0)      | 4 (3, 5)             | 2 (1, 3)       | 17 (11, 23)      | 0 (0, 1)      | 19 (13, 25)       | 2.4 (1.4, 3.6)  | 18.5 (11.6, 24.8) | 0.6 (0.4, 0.8) | 8.4 (5.6, 11.0)   |
| Mauritius                        | Women | Ages 45 to 64     | 0.156   | 0.5 (0.2, 0.9) | 28 (26, 30) | 3 (2, 4)          | 38 (26, 50)          | 0 (0, 1)      | 41 (29, 53)          | 18 (11, 26)    | 242 (169, 321)   | 3 (2, 4)      | 262 (187, 341)    | 1.4 (0.9, 2.1)  | 10.2 (7.2, 13.6)  | 0.5 (0.3, 0.7) | 8.0 (5.7, 10.4)   |
| Mauritius                        | Women | Ages 65 and older | 0.151   | 0.4 (0.1, 0.6) | 26 (24, 28) | 6 (3, 8)          | 46 (34, 58)          | 0 (0, 1)      | 52 (39, 64)          | 106 (61, 160)  | 864 (639, 1097)  | 7 (4, 11)     | 978 (737, 1221)   | 0.5 (0.3, 0.8)  | 4.5 (3.3, 5.7)    | 0.4 (0.2, 0.6) | 2.8 (2.1, 3.5)    |
| Mauritius                        | Women | Overall           | 0.411   | 0.6 (0.2, 1.1) | 26 (24, 28) | 9 (5, 13)         | 87 (70, 104)         | 1 (1, 1)      | 96 (78, 115)         | 21 (13, 31)    | 211 (171, 253)   | 2 (1, 3)      | 234 (191, 280)    | 0.7 (0.4, 1.0)  | 6.2 (5.0, 7.4)    | 0.5 (0.3, 0.7) | 4.0 (3.3, 4.8)    |
| Mauritius                        | Men   | Ages 20 to 44     | 0.105   | 1.1 (0.3, 1.8) | 23 (23, 26) | 1 (1, 2)          | 7 (4, 9)             | 0 (0, 0)      | 8 (5, 10)            | 5 (3, 7)       | 34 (22, 45)      | 0 (0, 0)      | 40 (27, 51)       | 2.3 (1.5, 3.2)  | 19.6 (12.7, 26.0) | 0.4 (0.2, 0.6) | 10.6 (7.2, 13.7)  |
| Mauritius                        | Men   | Ages 45 to 64     | 0.15    | 0.6 (0.2, 1.0) | 26 (24, 28) | 7 (4, 10)         | 63 (44, 82)          | 0 (0, 0)      | 71 (51, 91)          | 47 (28, 68)    | 424 (297, 552)   | 2 (1, 3)      | 473 (342, 609)    | 1.5 (0.9, 2.2)  | 11.2 (7.8, 14.5)  | 0.4 (0.2, 0.6) | 8.1 (5.9, 10.4)   |
| Mauritius                        | Men   | Ages 65 and older | 0.133   | 0.4 (0.1, 0.7) | 24 (23, 26) | 4 (3, 6)          | 42 (30, 55)          | 0 (0, 0)      | 47 (34, 59)          | 114 (76, 154)  | 141 (809, 1489)  | 7 (4, 9)      | 1263 (925, 1609)  | 0.5 (0.3, 0.6)  | 5.3 (3.7, 6.9)    | 0.2 (0.1, 0.3) | 3.1 (2.3, 3.9)    |
| Mauritius                        | Men   | Overall           | 0.388   | 0.7 (0.2, 1.2) | 25 (23, 26) | 12 (8, 17)        | 112 (90, 135)        | 1 (0, 1)      | 125 (100, 149)       | 32 (20, 44)    | 290 (231, 349)   | 2 (1, 2)      | 323 (259, 386)    | 0.9 (0.6, 1.2)  | 8.0 (6.4, 9.6)    | 0.3 (0.2, 0.4) | 5.1 (4.1, 6.1)    |
| Mauritius                        | Both  | Overall           | 0.798   | 0.7 (0.2, 1.1) | 26 (24, 27) | 21 (13, 30)       | 199 (169, 228)       | 1 (1, 2)      | 222 (188, 253)       | 26 (17, 37)    | 249 (212, 286)   | 2 (1, 3)      | 278 (236, 317)    | 0.8 (0.5, 1.1)  | 7.1 (6.0, 8.1)    | 0.4 (0.2, 0.6) | 4.6 (3.9, 5.2)    |
| Mexico                           | Women | Ages 20 to 44     | 9.09    | 3.8 (2.9, 4.8) | 28 (27, 29) | 108 (66, 150)     | 944 (731, 1110)      | 29 (17, 43)   | 1082 (843, 1278)     | 6 (4, 9)       | 55 (42, 64)      | 2 (1, 3)      | 63 (49, 74)       | 9.3 (5.7, 12.9) | 47.6 (36.9, 56.0) | 2.2 (1.3, 3.3) | 27.6 (21.5, 32.6) |
| Mexico                           | Women | Ages 45 to 64     | 9.67    | 2.1 (1.6, 2.6) | 31 (29, 32) | 274 (163, 391)    | 4186 (2970, 5200)    | 81 (47, 124)  | 4541 (3300, 5578)    | 28 (17, 40)    | 433 (307, 538)   | 8 (5, 13)     | 470 (341, 577)    | 4.3 (2.5, 6.1)  | 27.7 (19.7, 34.4) | 1.7 (1.0, 2.7) | 21.8 (15.9, 26.8) |
| Mexico                           | Women | Ages 65 and older | 12.1    | 1.4 (1.1, 1.8) | 28 (27, 29) | 653 (367, 992)    | 4953 (3656, 6173)    | 86 (49, 131)  | 5693 (4302, 7027)    | 166 (93, 253)  | 1261 (931, 1571) | 22 (12, 33)   | 1449 (1095, 1789) | 1.5 (0.8, 2.2)  | 12.5 (9.2, 15.5)  | 1.4 (0.8, 2.2) | 7.4 (5.6, 9.1)    |
| Mexico                           | Women | Overall           | 30.8    | 2.5 (1.9, 3.1) | 29 (28, 30) | 1036 (619, 1491)  | 10083 (8295, 11788)  | 97 (115, 284) | 11316 (9247, 13190)  | 34 (20, 48)    | 327 (269, 383)   | 6 (4, 9)      | 367 (300, 428)    | 2.0 (1.2, 2.9)  | 17.7 (14.6, 20.7) | 1.6 (0.9, 2.3) | 11.1 (9.1, 12.9)  |
| Mexico                           | Men   | Ages 20 to 44     | 8.65    | 4.2 (3.1, 5.2) | 27 (26, 28) | 287 (175, 410)    | 1588 (1243, 1836)    | 15 (9, 22)    | 1891 (1484, 2222)    | 17 (11, 25)    | 97 (76, 112)     | 1 (1, 1)      | 115 (90, 135)     | 9.6 (5.9, 13.7) | 49.3 (38.6, 57.0) | 1.3 (0.7, 2.0) | 33.6 (26.4, 39.5) |
| Mexico                           | Men   | Ages 45 to 64     | 9.11    | 2.2 (1.7, 2.7) | 28 (28, 29) | 562 (342, 793)    | 5144 (3732, 6399)    | 41 (25, 59)   | 5748 (4202, 7076)    | 62 (38, 87)    | 565 (410, 702)   | 5 (3, 6)      | 631 (461, 777)    | 4.4 (2.7, 6.3)  | 29.7 (21.5, 36.9) | 1.1 (0.7, 1.7) | 22.1 (16.2, 27.2) |
| Mexico                           | Men   | Ages 65 and older | 11.1    | 1.6 (1.2, 1.9) | 27 (26, 27) | 717 (425, 1069)   | 4401 (3246, 5525)    | 55 (33, 80)   | 5173 (3943, 6382)    | 219 (130, 327) | 1345 (992, 1688) | 17 (10, 25)   | 1581 (1205, 1950) | 1.7 (1.0, 2.6)  | 14.5 (10.7, 18.2) | 0.9 (0.5, 1.4) | 7.8 (5.9, 9.6)    |
| Mexico                           | Men   | Overall           | 28.8    | 2.7 (2.1, 3.3) | 27 (26, 28) | 1567 (944, 2208)  | 11133 (9164, 12920)  | 112 (67, 159) | 12812 (10608, 15035) | 54 (33, 77)    | 386 (318, 448)   | 4 (2, 6)      | 444 (368, 521)    | 2.7 (1.7, 3.9)  | 21.8 (18.0, 25.4) | 1.0 (0.6, 1.5) | 13.1 (10.8, 15.3) |
| Mexico                           | Both  | Overall           | 59.6    | 2.6 (2.0, 3.2) | 28 (27, 29) | 2602 (1560, 3672) | 21216 (18345, 23880) | 09 (184, 438) | 42127 (20550, 27569) | 44 (26, 62)    | 356 (308, 400)   | 5 (3, 7)      | 405 (345, 462)    | 2.4 (1.4, 3.4)  | 19.7 (17.0, 22.1) | 1.4 (0.8, 2.0) | 12.1 (10.3, 13.8) |
| Micronesia (Federated States of) | Women | Ages 20 to 44     | 0.00796 | 1.2 (0.4, 2.0) | 32 (30, 33) | 0 (0, 0)          | 2 (1, 2)             | 0 (0, 0)      | 2 (1, 2)             | 5 (3, 8)       | 117 (83, 150)    | 1 (1, 2)      | 124 (89, 158)     | 3.3 (1.9, 4.7)  | 21.8 (15.5, 28.0) | 0.7 (0.4, 1.1) | 19.4 (13.9, 24.7) |
| Micronesia (Federated States of) | Women | Ages 45 to 64     | 0.00768 | 0.6 (0.2, 1.0) | 32 (30, 34) | 0 (0, 0)          | 5 (4, 7)             | 0 (0, 0)      | 6 (4, 7)             | 23 (14, 33)    | 690 (476, 907)   | 4 (3, 7)      | 718 (505, 932)    | 1.6 (1.0, 2.3)  | 11.6 (8.0, 15.2)  | 0.5 (0.3, 0.8) | 12.3 (8.7, 16.0)  |
| Micronesia (Federated States of) | Women | Ages 65 and older | 0.00726 | 0.4 (0.1, 0.7) | 27 (24, 31) | 0 (0, 0)          | 3 (2, 4)             | 0 (0, 0)      | 3 (2, 4)             | 83 (48, 119)   | 335 (930, 1763)  | 11 (6, 16)    | 1429 (1018, 1874) | 0.7 (0.4, 1.0)  | 6.1 (4.2, 8.0)    | 0.4 (0.3, 0.6) | 5.1 (3.7, 6.7)    |
| Micronesia (Federated States of) | Women | Overall           | 0.0229  | 0.8 (0.3, 1.3) | 30 (28, 33) | 0 (0, 1)          | 10 (8, 12)           | 0 (0, 0)      | 10 (8, 12)           | 19 (11, 27)    | 431 (341, 519)   | 3 (2, 5)      | 453 (366, 544)    | 1.1 (0.6, 1.5)  | 9.6 (7.6, 11.6)   | 0.5 (0.3, 0.7) | 8.9 (7.2, 10.7)   |
| Micronesia (Federated States of) | Men   | Ages 20 to 44     | 0.00857 | 1.3 (0.4, 2.2) | 27 (26, 29) | 0 (0, 0)          | 1 (1, 2)             | 0 (0, 0)      | 1 (1, 2)             | 22 (13, 31)    | 62 (66, 117)     | 0 (0, 1)      | 114 (85, 143)     | 3.7 (2.2, 5.2)  | 23.5 (16.9, 30.1) | 0.5 (0.3, 0.8) | 12.5 (9.3, 15.7)  |
| Micronesia (Federated States of) | Men   | Ages 45 to 64     | 0.00769 | 0.6 (0.2, 1.1) | 29 (28, 31) | 1 (0, 1)          | 5 (3, 6)             | 0 (0, 0)      | 5 (4, 7)             | 80 (48, 111)   | 624 (437, 805)   | 3 (2, 5)      | 707 (510, 884)    | 1.6 (1.0, 2.2)  | 12.4 (8.6, 15.9)  | 0.6 (0.4, 0.9) | 8.2 (5.9, 10.2)   |
| Micronesia (Federated States of) | Men   | Ages 65 and older | 0.00626 | 0.5 (0.2, 0.8) | 28 (26, 30) | 0 (0, 0)          | 2 (1, 3)             | 0 (0, 0)      | 2 (2, 3)             | 123 (75, 173)  | 1068 (728, 1422) | 12 (7, 18)    | 1204 (851, 1565)  | 0.7 (0.4, 1.0)  | 6.8 (4.6, 9.1)    | 0.6 (0.3, 0.8) | 4.0 (2.8, 5.2)    |
| Micronesia (Federated States of) | Men   | Overall           | 0.0225  | 0.8 (0.3, 1.4) | 28 (26, 30) | 1 (1, 2)          | 8 (6, 9)             | 0 (0, 0)      | 9 (7, 11)            | 50 (30, 69)    | 351 (277, 420)   | 2 (1, 3)      | 404 (324, 477)    | 1.4 (0.9, 2.0)  | 11.0 (8.7, 13.1)  | 0.6 (0.4, 0.9) | 6.9 (5.5, 8.1)    |
| Micronesia (Federated States of) | Both  | Overall           | 0.0454  | 0.8 (0.3, 1.3) | 29 (27, 31) | 2 (1, 2)          | 18 (15, 20)          | 0 (0, 0)      | 19 (17, 22)          | 34 (21, 48)    | 391 (336, 448)   | 3 (2, 4)      | 428 (365, 492)    | 1.3 (0.8, 1.8)  | 10.2 (8.7, 11.7)  | 0.5 (0.3, 0.8) | 7.8 (6.7, 9.0)    |
| Moldova                          | Women | Ages 20 to 44     | 0.273   | 0.5 (0.2, 0.9) | 25 (24, 26) | 1 (0, 1)          | 1 (1, 2)             | 2 (2, 2)      | 2 (2, 2)             | 1 (1, 2)       | 2 (2, 3)         | 0 (0, 0)      | 4 (3, 5)          | 1.6 (1.0, 2.3)  | 14.1 (10.6, 17.4) | 0.3 (0.2, 0.5) | 2.2 (1.7, 2.7)    |
| Moldova                          | Women | Ages 45 to 64     | 0.511   | 0.3 (0.1, 0.4) | 30 (28, 31) | 9 (5, 13)         | 7 (5, 10)            | 1 (1, 2)      | 18 (12, 23)          | 18 (11, 25)    | 14 (9, 19)       | 2 (1, 4)      | 34 (24, 44)       | 0.9 (0.5, 1.3)  | 7.0 (4.7, 9.4)    | 0.3 (0.1, 0.4) | 1.0 (0.7, 1.3)    |
| Moldova                          | Women | Ages 65 and older | 0.479   | 0.2 (0.1, 0.3) | 29 (25, 33) | 41 (23, 60)       | 9 (6, 11)            | 1 (1, 2)      | 51 (32, 71)          | 161 (91, 238)  | 34 (24, 45)      | 5 (3, 8)      | 200 (127, 283)    | 0.4 (0.2, 0.6)  | 4.3 (3.1, 5.7)    | 0.2 (0.1, 0.3) | 0.4 (0.3, 0.6)    |
| Moldova                          | Women | Overall           | 1.26    | 0.3 (0.1, 0.6) | 28 (25, 30) | 51 (30, 74)       | 17 (13, 21)          | 3 (2, 4)      | 70 (47, 97)          | 40 (23, 59)    | 13 (10, 16)      | 2 (1, 3)      | 56 (37, 77)       | 0.4 (0.3, 0.6)  | 5.5 (4.3, 6.8)    | 0.2 (0.1, 0.3) | 0.5 (0.3, 0.7)    |
| Moldova                          | Men   | Ages 20 to 44     | 0.267   | 0.6 (0.2, 1.0) | 24 (21, 26) | 1 (1, 2)          | 3 (2, 4)             | 0 (0, 0)      | 4 (3, 5)             | 3 (1, 5)       | 6 (4, 7)         | 0 (0, 0)      | 9 (6, 11)         | 0.8 (0.4, 1.2)  | 13.1 (9.2, 17.0)  | 0.1 (0.1, 0.2) | 1.7 (1.2, 2.1)    |
| Moldova                          | Men   | Ages 45 to 64     | 0.447   | 0.3 (0.1, 0.5) | 25 (22, 28) | 13 (9, 18)        | 8 (5, 11)            | 1 (1, 1)      | 22 (17, 28)          | 30 (20, 40)    | 18 (12, 24)      | 2 (1, 3)      | 50 (38, 62)       | 0.6 (0.4, 0.8)  | 7.4 (4.9, 9.7)    | 0.2 (0.1, 0.2) | 0.8 (0.6, 1.0)    |
| Moldova                          | Men   | Ages 65 and older | 0.357   | 0.2 (0.1, 0.3) | 24 (21, 27) | 15 (7, 23)        | 5 (3, 7)             | 1 (0, 1)      | 21 (13, 30)          | 102 (51, 158)  | 36 (23, 50)      | 4 (2, 6)      | 143 (88, 203)     | 0.2 (0.1, 0.3)  | 4.3 (2.7, 5.8)    | 0.1 (0.0, 0.1) | 0.2 (0.2, 0.3)    |
| Moldova                          | Men   | Overall           | 1.07    | 0.4 (0.1, 0.6) | 24 (21, 27) | 30 (19, 41)       | 16 (13, 19)          | 2 (1, 2)      | 47 (35, 61)          | 28 (17, 38)    | 15 (12, 18)      | 2 (1, 2)      | 44 (32, 57)       | 0.3 (0.2, 0.4)  | 6.3 (4.9, 7.6)    | 0.1 (0.1, 0.2) | 0.4 (0.3, 0.5)    |
| Moldova                          | Both  | Overall           | 2.33    | 0.4 (0.1, 0.6) | 26 (23, 29) | 80 (53, 109)      | 33 (28, 38)          | 4 (3, 6)      | 118 (88, 149)        | 34 (23, 47)    | 14 (12, 16)      | 2 (1, 3)      | 50 (38, 64)       | 0.4 (0.3, 0.5)  | 5.9 (5.0, 6.7)    | 0.2 (0.1, 0.2) | 0.5 (0.3, 0.6)    |
| Mongolia                         | Women | Ages 20 to 44     | 0.244   | 0.1 (0.0, 0.2) | 25 (24, 25) | 1 (1, 2)          | 2 (2, 3)             | 0 (0, 0)      | 4 (3, 5)             | 3 (2, 4)       | 5 (4, 7)         | 0 (0, 0)      | 8 (6, 10)         | 0.8 (0.5, 1.1)  | 7.6 (5.4, 9.9)    | 0.3 (0.2, 0.4) | 1.7 (1.3, 2.2)    |
| Mongolia                         | Women | Ages 45 to 64     | 0.215   | 0.1 (0.0, 0.1) | 27 (26, 28) | 3 (2, 4)          | 2 (1, 3)             | 0 (0, 1)      | 5 (4, 7)             | 13 (8, 19)     | 9 (6, 12)        | 2 (1, 2)      | 24 (17, 31)       | 0.7 (0.4, 1.0)  | 5.4 (3.6, 7.2)    | 0.4 (0.2, 0.6) | 0.9 (0.6, 1.1)    |
| Mongolia                         | Women | Ages 65 and older | 0.264   | 0.1 (0.0, 0.1) | 26 (23, 29) | 5 (3, 8)          | 1 (1, 1)             | 7 (4, 9)      | 82 (47, 118)         | 12 (9, 16)     | 10 (6, 14)       | 104 (64, 146) | 0.3 (0.2, 0.5)    | 3.0 (2.1, 3.9)  | 0.5 (0.3, 0.7)    | 0.4 (0.2, 0.5) |                   |
| Mongolia                         | Women | Overall           | 0.723   | 0.1 (0.0, 0.2) | 26 (24, 27) | 9 (5, 13)         | 5 (4, 6)             | 1 (1, 2)      | 16 (11, 20)          | 13 (7, 18)     | 7 (6, 9)         | 1 (1, 2)      | 22 (15, 28)       | 0.4 (0.2, 0.6)  | 5.5 (4.3, 6.5)    | 0.4 (0.3, 0.6) | 0.6 (0.4, 0.8)    |
| Mongolia                         | Men   | Ages 20 to 44     | 0.246   | 0.2 (0.0, 0.3) | 24 (24, 25) | 3 (2, 4)          | 4 (3, 6)             | 0 (0, 0)      | 6 (4, 9)             | 6 (4, 9)       | 10 (7, 13)       | 0 (0, 0)      | 17 (13, 21)       | 0.8 (0.5, 1.2)  | 7.9 (5.6, 10.1)   | 0.2 (0.1, 0.3) | 1.7 (1.3, 2.1)    |
| Mongolia                         | Men   | Ages 45 to 64     | 0.191   | 0.1 (0.0, 0.1) | 26 (25, 27) | 7 (4, 10)         | 3 (2, 4)             | 0 (0, 1)      | 10 (7, 14)           | 35 (21, 50)    | 16 (10, 21)      | 2 (1, 4)      | 53 (36, 71)       | 0.7 (0.4, 1.0)  | 5.5 (3.7, 7.5)    | 0.4 (0.3, 0.7) | 0.8 (0.6, 1.1)    |
| Mongolia                         | Men   | Ages 65 and older | 0.24    | 0.1 (0.0, 0.1) | 25 (24, 27) | 6 (4, 9)          | 1 (1, 2)             | 1 (0, 1)      | 8 (5, 11)            | 128 (75, 183)  | 28 (19, 38)      | 12 (7, 18)    | 168 (109, 228)    | 0.4 (0.2, 0.5)  | 3.3 (2.2, 4.4)    | 0.5 (0.3, 0.8) | 0.4 (0.3, 0.6)    |
| Mongolia                         | Men   | Overall           | 0.677   | 0.1 (0.0, 0.2) | 25 (24, 26) | 16 (10, 22)       | 9 (7, 10)            | 1 (1, 2)      | 25 (18, 33)          | 23 (14, 32)    | 13 (10, 15)      | 2 (1, 2)      | 38 (27, 49)       | 0.5 (0.3, 0.7)  | 5.8 (4.6, 6.9)    | 0.5 (0.3, 0.7) | 0.7 (0.5, 0.9)    |
| Mongolia                         | Both  | Overall           | 1.4     | 0.1 (0.0, 0.2) | 26 (24, 27) | 25                |                      |               |                      |                |                  |               |                   |                 |                   |                |                   |

|             |       |                   |       |                |             |               |                   |             |                   |             |                |             |                |                |                   |                |                |
|-------------|-------|-------------------|-------|----------------|-------------|---------------|-------------------|-------------|-------------------|-------------|----------------|-------------|----------------|----------------|-------------------|----------------|----------------|
| Mozambique  | Women | Ages 45 to 64     | 1.3   | 0.1(0.0, 0.2)  | 24 (23, 25) | 3 (1, 5)      | 33 (22, 45)       | 1 (1, 2)    | 37 (26, 49)       | 2 (1, 4)    | 26 (17, 35)    | 1 (0, 1)    | 29 (20, 38)    | 0.4 (0.2, 0.6) | 5.2 (3.5, 7.1)    | 0.1 (0.1, 0.2) | 1.6 (1.1, 2.2) |
| Mozambique  | Women | Ages 65 and older | 1.62  | 0.1(0.0, 0.1)  | 23 (19, 26) | 7 (4, 11)     | 40 (27, 53)       | 2 (1, 2)    | 49 (34, 63)       | 16 (8, 25)  | 91 (61, 119)   | 3 (2, 5)    | 111 (77, 141)  | 0.2 (0.1, 0.3) | 2.9 (1.9, 3.7)    | 0.1 (0.1, 0.2) | 0.8 (0.5, 1.0) |
| Mozambique  | Women | Overall           | 4.57  | 0.1(0.0, 0.2)  | 23 (21, 25) | 11 (6, 17)    | 104 (85, 124)     | 3 (2, 5)    | 118 (95, 140)     | 2 (1, 4)    | 23 (19, 27)    | 1 (0, 1)    | 26 (21, 31)    | 0.2 (0.1, 0.3) | 4.3 (3.5, 5.2)    | 0.1 (0.1, 0.2) | 1.3 (1.0, 1.5) |
| Mozambique  | Men   | Ages 20 to 44     | 1.59  | 0.3 (0.1, 0.4) | 22 (21, 23) | 1 (1, 2)      | 41 (28, 55)       | 0 (0, 1)    | 43 (29, 56)       | 0 (0, 1)    | 16 (11, 22)    | 0 (0, 0)    | 17 (12, 22)    | 0.5 (0.2, 0.7) | 7.4 (5.1, 9.9)    | 0.1 (0.1, 0.2) | 5.6 (3.9, 7.4) |
| Mozambique  | Men   | Ages 45 to 64     | 1.06  | 0.1(0.0, 0.2)  | 22 (21, 24) | 3 (2, 5)      | 57 (38, 75)       | 1 (1, 2)    | 61 (42, 80)       | 3 (2, 5)    | 53 (36, 70)    | 1 (1, 2)    | 58 (40, 75)    | 0.3 (0.2, 0.5) | 5.3 (3.5, 6.9)    | 0.1 (0.1, 0.2) | 2.5 (1.7, 3.3) |
| Mozambique  | Men   | Ages 65 and older | 1.25  | 0.1(0.0, 0.2)  | 22 (20, 24) | 4 (2, 6)      | 41 (27, 55)       | 2 (1, 3)    | 47 (32, 61)       | 12 (6, 18)  | 125 (83, 167)  | 5 (2, 8)    | 142 (98, 185)  | 0.2 (0.1, 0.3) | 3.1 (2.1, 4.1)    | 0.1 (0.1, 0.2) | 1.1 (0.8, 1.5) |
| Mozambique  | Men   | Overall           | 3.91  | 0.2 (0.0, 0.3) | 22 (21, 23) | 8 (4, 12)     | 139 (110, 166)    | 3 (2, 5)    | 150 (119, 178)    | 2 (1, 3)    | 36 (28, 43)    | 1 (0, 1)    | 39 (31, 46)    | 0.2 (0.1, 0.3) | 4.7 (3.7, 5.6)    | 0.1 (0.1, 0.2) | 2.0 (1.6, 2.4) |
| Mozambique  | Both  | Overall           | 8.47  | 0.2 (0.0, 0.3) | 23 (21, 24) | 19 (10, 29)   | 243 (205, 277)    | 6 (3, 10)   | 268 (228, 305)    | 2 (1, 3)    | 29 (24, 33)    | 1 (0, 1)    | 32 (27, 36)    | 0.2 (0.1, 0.3) | 4.5 (3.8, 5.2)    | 0.1 (0.1, 0.2) | 1.6 (1.4, 1.8) |
| Myanmar     | Women | Ages 20 to 44     | 4.17  | 0.5 (0.1, 0.8) | 22 (18, 26) | 6 (3, 10)     | 99 (66, 131)      | 1 (1, 2)    | 107 (73, 139)     | 1 (0, 1)    | 13 (8, 17)     | 0 (0, 0)    | 14 (9, 18)     | 0.8 (0.4, 1.4) | 11.6 (7.7, 15.3)  | 0.2 (0.1, 0.3) | 4.7 (3.2, 6.1) |
| Myanmar     | Women | Ages 45 to 64     | 4.53  | 0.3 (0.1, 0.4) | 23 (20, 27) | 27 (14, 43)   | 351 (229, 467)    | 4 (2, 6)    | 382 (260, 499)    | 6 (3, 9)    | 77 (51, 103)   | 1 (0, 1)    | 84 (57, 110)   | 0.5 (0.2, 0.7) | 6.7 (4.4, 8.9)    | 0.1 (0.1, 0.2) | 3.0 (2.1, 4.0) |
| Myanmar     | Women | Ages 65 and older | 5.07  | 0.2 (0.1, 0.3) | 22 (17, 28) | 45 (23, 69)   | 319 (215, 423)    | 3 (2, 5)    | 368 (255, 483)    | 33 (17, 50) | 233 (157, 308) | 2 (1, 4)    | 269 (186, 352) | 0.2 (0.1, 0.3) | 3.7 (2.5, 4.8)    | 0.1 (0.1, 0.2) | 1.2 (0.8, 1.6) |
| Myanmar     | Women | Overall           | 13.8  | 0.3 (0.1, 0.5) | 23 (18, 27) | 79 (41, 119)  | 769 (599, 916)    | 9 (4, 13)   | 857 (674, 1021)   | 6 (3, 9)    | 56 (44, 67)    | 1 (0, 1)    | 62 (49, 74)    | 0.3 (0.1, 0.4) | 5.2 (4.0, 6.2)    | 0.1 (0.1, 0.2) | 1.9 (1.5, 2.2) |
| Myanmar     | Men   | Ages 20 to 44     | 4.05  | 0.5 (0.2, 0.9) | 21 (19, 24) | 8 (4, 13)     | 111 (70, 154)     | 1 (0, 1)    | 120 (77, 163)     | 1 (1, 2)    | 15 (9, 20)     | 0 (0, 0)    | 16 (10, 21)    | 0.8 (0.4, 1.3) | 11.2 (7.1, 15.5)  | 0.1 (0.1, 0.2) | 6.2 (4.0, 8.4) |
| Myanmar     | Men   | Ages 45 to 64     | 4.23  | 0.3 (0.1, 0.5) | 22 (19, 25) | 36 (19, 56)   | 310 (209, 415)    | 3 (1, 4)    | 349 (247, 459)    | 4 (4, 13)   | 73 (49, 98)    | 1 (0, 1)    | 82 (58, 109)   | 0.5 (0.2, 0.7) | 7.1 (4.8, 9.5)    | 0.2 (0.1, 0.2) | 2.8 (2.0, 3.7) |
| Myanmar     | Men   | Ages 65 and older | 4.66  | 0.2 (0.1, 0.3) | 21 (18, 24) | 29 (15, 42)   | 185 (120, 254)    | 2 (1, 3)    | 216 (146, 288)    | 26 (14, 39) | 170 (110, 233) | 2 (1, 2)    | 198 (134, 265) | 0.2 (0.1, 0.3) | 3.5 (2.3, 4.8)    | 0.1 (0.1, 0.2) | 1.0 (0.7, 1.4) |
| Myanmar     | Men   | Overall           | 12.9  | 0.3 (0.1, 0.6) | 21 (19, 24) | 73 (38, 112)  | 606 (474, 737)    | 5 (3, 7)    | 684 (544, 828)    | 6 (3, 9)    | 47 (37, 57)    | 0 (0, 1)    | 53 (42, 64)    | 0.3 (0.2, 0.5) | 5.7 (4.4, 6.9)    | 0.1 (0.1, 0.2) | 1.9 (1.5, 2.3) |
| Myanmar     | Both  | Overall           | 26.7  | 0.3 (0.1, 0.6) | 22 (18, 26) | 152 (80, 228) | 1375 (1150, 1585) | 14 (7, 21)  | 1541 (1284, 1781) | 6 (3, 9)    | 51 (43, 59)    | 1 (0, 1)    | 58 (48, 67)    | 0.3 (0.1, 0.4) | 5.4 (4.5, 6.2)    | 0.1 (0.1, 0.2) | 1.9 (1.6, 2.2) |
| Namibia     | Women | Ages 20 to 44     | 0.178 | 0.6 (0.2, 1.0) | 24 (24, 25) | 1 (0, 1)      | 5 (4, 6)          | 0 (0, 0)    | 6 (4, 7)          | 2 (1, 3)    | 16 (12, 21)    | 0 (0, 1)    | 18 (14, 23)    | 1.7 (0.9, 2.9) | 13.9 (10.1, 17.8) | 0.5 (0.3, 0.7) | 6.7 (5.0, 8.4) |
| Namibia     | Women | Ages 45 to 64     | 0.148 | 0.3 (0.1, 0.5) | 26 (25, 28) | 2 (1, 4)      | 19 (13, 25)       | 0 (0, 1)    | 22 (15, 28)       | 17 (9, 26)  | 126 (87, 168)  | 3 (2, 5)    | 145 (104, 190) | 1.2 (0.7, 1.8) | 7.5 (5.2, 10.1)   | 0.5 (0.3, 0.7) | 4.6 (3.3, 6.0) |
| Namibia     | Women | Ages 65 and older | 0.17  | 0.2 (0.1, 0.4) | 25 (22, 28) | 3 (2, 4)      | 19 (13, 25)       | 0 (0, 1)    | 22 (16, 29)       | 65 (43, 88) | 399 (270, 525) | 8 (5, 11)   | 472 (340, 604) | 0.4 (0.3, 0.6) | 4.2 (2.8, 5.5)    | 0.3 (0.2, 0.5) | 1.9 (1.4, 2.5) |
| Namibia     | Women | Overall           | 0.496 | 0.4 (0.1, 0.6) | 25 (23, 27) | 6 (4, 9)      | 43 (33, 52)       | 1 (1, 1)    | 50 (39, 60)       | 12 (8, 17)  | 86 (67, 104)   | 2 (1, 3)    | 100 (80, 120)  | 0.6 (0.4, 0.9) | 5.7 (4.5, 7.0)    | 0.4 (0.3, 0.6) | 2.9 (2.3, 3.5) |
| Namibia     | Men   | Ages 20 to 44     | 0.183 | 0.6 (0.2, 1.1) | 22 (21, 23) | 0 (0, 1)      | 6 (4, 8)          | 0 (0, 0)    | 7 (4, 9)          | 1 (1, 2)    | 20 (12, 26)    | 0 (0, 0)    | 21 (14, 28)    | 0.9 (0.4, 1.4) | 12.3 (7.6, 16.6)  | 0.4 (0.2, 0.6) | 6.4 (4.1, 8.6) |
| Namibia     | Men   | Ages 45 to 64     | 0.125 | 0.3 (0.1, 0.5) | 24 (22, 25) | 2 (1, 2)      | 17 (12, 23)       | 0 (0, 1)    | 19 (13, 25)       | 12 (6, 20)  | 138 (93, 180)  | 3 (1, 5)    | 154 (107, 199) | 0.5 (0.2, 0.8) | 7.4 (4.9, 9.6)    | 0.4 (0.2, 0.6) | 3.3 (2.3, 4.3) |
| Namibia     | Men   | Ages 65 and older | 0.163 | 0.2 (0.1, 0.4) | 23 (21, 25) | 1 (1, 2)      | 12 (8, 16)        | 0 (0, 0)    | 14 (10, 18)       | 41 (20, 62) | 334 (220, 444) | 8 (4, 12)   | 383 (269, 498) | 0.3 (0.1, 0.4) | 4.2 (2.8, 5.6)    | 0.3 (0.1, 0.5) | 1.6 (1.1, 2.0) |
| Namibia     | Men   | Overall           | 0.472 | 0.4 (0.1, 0.7) | 23 (21, 24) | 3 (2, 5)      | 35 (28, 43)       | 1 (0, 1)    | 40 (32, 48)       | 7 (4, 11)   | 75 (60, 91)    | 2 (1, 2)    | 84 (67, 101)   | 0.4 (0.2, 0.6) | 6.2 (4.9, 7.5)    | 0.3 (0.2, 0.5) | 2.5 (2.0, 3.0) |
| Namibia     | Both  | Overall           | 0.969 | 0.4 (0.1, 0.7) | 24 (22, 26) | 10 (7, 13)    | 78 (65, 90)       | 2 (1, 2)    | 89 (75, 102)      | 10 (7, 13)  | 81 (67, 93)    | 2 (1, 2)    | 92 (78, 106)   | 0.5 (0.3, 0.7) | 5.9 (5.0, 6.9)    | 0.4 (0.3, 0.5) | 2.7 (2.3, 3.1) |
| Nepal       | Women | Ages 20 to 44     | 2.33  | 0.1 (0.0, 0.2) | 21 (20, 22) | 2 (1, 4)      | 17 (11, 23)       | 0 (0, 1)    | 20 (13, 26)       | 1 (0, 1)    | 4 (3, 6)       | 0 (0, 0)    | 5 (3, 6)       | 0.4 (0.2, 0.6) | 6.2 (4.0, 8.4)    | 0.1 (0.1, 0.2) | 1.8 (1.2, 2.4) |
| Nepal       | Women | Ages 45 to 64     | 2.01  | 0.1 (0.0, 0.1) | 21 (20, 22) | 2 (1, 4)      | 20 (11, 30)       | 1 (0, 1)    | 23 (14, 34)       | 1 (1, 2)    | 10 (5, 15)     | 0 (0, 0)    | 12 (7, 17)     | 0.1 (0.1, 0.2) | 1.9 (1.0, 2.8)    | 0.1 (0.0, 0.1) | 0.6 (0.4, 0.9) |
| Nepal       | Women | Ages 65 and older | 2.45  | 0.1 (0.0, 0.1) | 19 (16, 22) | 0 (0, 0)      | 0 (0, 0)          | 0 (0, 0)    | 0 (0, 0)          | 0 (0, 0)    | 0 (0, 0)       | 0 (0, 0)    | 0 (0, 0)       | 0.0 (0.0, 0.0) | 0.0 (0.0, 0.0)    | 0.0 (0.0, 0.0) | 0.0 (0.0, 0.0) |
| Nepal       | Women | Overall           | 6.79  | 0.1 (0.0, 0.2) | 20 (19, 22) | 5 (2, 7)      | 37 (26, 49)       | 1 (1, 2)    | 43 (31, 55)       | 1 (0, 1)    | 5 (4, 7)       | 0 (0, 0)    | 6 (5, 8)       | 0.0 (0.0, 0.1) | 1.6 (0.7, 1.3)    | 0.1 (0.0, 0.1) | 0.3 (0.2, 0.4) |
| Nepal       | Men   | Ages 20 to 44     | 2.31  | 0.2 (0.0, 0.3) | 21 (19, 23) | 2 (1, 3)      | 17 (9, 21)        | 0 (0, 0)    | 15 (9, 21)        | 1 (0, 1)    | 3 (2, 5)       | 0 (0, 0)    | 4 (2, 6)       | 0.2 (0.1, 0.4) | 3.0 (1.9, 5.4)    | 0.1 (0.1, 0.2) | 1.2 (0.7, 1.8) |
| Nepal       | Men   | Ages 45 to 64     | 1.71  | 0.1 (0.0, 0.1) | 21 (19, 23) | 3 (2, 5)      | 19 (11, 29)       | 0 (0, 1)    | 23 (13, 32)       | 2 (1, 3)    | 11 (6, 17)     | 0 (0, 0)    | 13 (8, 19)     | 0.1 (0.0, 0.2) | 1.9 (1.0, 2.7)    | 0.1 (0.0, 0.1) | 0.6 (0.3, 0.8) |
| Nepal       | Men   | Ages 65 and older | 2.1   | 0.1 (0.0, 0.1) | 20 (18, 23) | 0 (0, 0)      | 0 (0, 0)          | 0 (0, 0)    | 0 (0, 0)          | 0 (0, 0)    | 0 (0, 0)       | 0 (0, 0)    | 0 (0, 0)       | 0.0 (0.0, 0.0) | 0.0 (0.0, 0.0)    | 0.0 (0.0, 0.0) | 0.0 (0.0, 0.0) |
| Nepal       | Men   | Overall           | 6.12  | 0.1 (0.0, 0.2) | 21 (18, 23) | 5 (2, 7)      | 32 (21, 43)       | 0 (0, 1)    | 38 (26, 49)       | 1 (0, 1)    | 5 (3, 7)       | 0 (0, 0)    | 6 (4, 8)       | 0.1 (0.0, 0.1) | 0.9 (0.6, 1.3)    | 0.0 (0.0, 0.1) | 0.3 (0.2, 0.4) |
| Nepal       | Both  | Overall           | 12.9  | 0.1 (0.0, 0.2) | 20 (18, 22) | 10 (5, 15)    | 70 (53, 86)       | 1 (1, 2)    | 81 (64, 99)       | 1 (0, 1)    | 5 (4, 7)       | 0 (0, 0)    | 6 (5, 8)       | 0.1 (0.0, 0.1) | 1.0 (0.7, 1.2)    | 0.1 (0.0, 0.1) | 0.3 (0.2, 0.4) |
| Netherlands | Women | Ages 20 to 44     | 0.984 | 0.6 (0.5, 0.8) | 24 (23, 26) | 1 (1, 1)      | 3 (2, 4)          | 1 (0, 1)    | 5 (4, 6)          | 0 (0, 1)    | 1 (1, 2)       | 0 (0, 1)    | 2 (2, 3)       | 1.5 (1.0, 2.1) | 13.2 (8.5, 17.8)  | 0.3 (0.2, 0.5) | 1.3 (1.0, 1.7) |
| Netherlands | Women | Ages 45 to 64     | 2.32  | 0.3 (0.2, 0.3) | 27 (25, 29) | 7 (4, 9)      | 21 (14, 28)       | 7 (4, 10)   | 34 (25, 44)       | 3 (2, 4)    | 9 (6, 12)      | 3 (2, 4)    | 15 (11, 19)    | 0.9 (0.6, 1.3) | 7.3 (4.9, 9.9)    | 0.3 (0.2, 0.4) | 1.0 (0.7, 1.2) |
| Netherlands | Women | Ages 65 and older | 2.66  | 0.2 (0.2, 0.3) | 28 (26, 30) | 44 (23, 69)   | 93 (68, 118)      | 18 (11, 26) | 155 (115, 195)    | 31 (16, 48) | 64 (47, 82)    | 12 (7, 18)  | 107 (79, 135)  | 0.3 (0.2, 0.5) | 2.8 (2.0, 3.5)    | 0.2 (0.1, 0.3) | 0.6 (0.5, 0.8) |
| Netherlands | Women | Overall           | 5.96  | 0.4 (0.3, 0.5) | 26 (24, 28) | 52 (28, 80)   | 117 (90, 142)     | 25 (15, 36) | 194 (149, 240)    | 9 (5, 13)   | 20 (15, 24)    | 4 (3, 6)    | 33 (25, 40)    | 0.4 (0.2, 0.6) | 3.2 (2.5, 3.9)    | 0.2 (0.2, 0.4) | 0.7 (0.5, 0.9) |
| Netherlands | Men   | Ages 20 to 44     | 0.991 | 0.7 (0.6, 0.9) | 25 (24, 26) | 3 (2, 5)      | 8 (5, 10)         | 1 (0, 1)    | 12 (8, 15)        | 2 (1, 2)    | 3 (2, 5)       | 0 (0, 0)    | 5 (4, 7)       | 1.8 (1.1, 2.6) | 14.4 (9.4, 19.4)  | 0.4 (0.2, 0.5) | 3.5 (2.5, 4.5) |
| Netherlands | Men   | Ages 45 to 64     | 2.34  | 0.3 (0.2, 0.4) | 27 (26, 29) | 20 (12, 28)   | 47 (33, 61)       | 8 (5, 12)   | 75 (56, 96)       | 8 (5, 12)   | 20 (14, 26)    | 3 (2, 5)    | 32 (24, 41)    | 1.0 (0.6, 1.4) | 7.5 (5.4, 9.9)    | 0.3 (0.2, 0.5) | 1.6 (1.2, 2.1) |
| Netherlands | Men   | Ages 65 and older | 2.36  | 0.2 (0.2, 0.3) | 27 (26, 29) | 45 (27, 68)   | 78 (58, 97)       | 19 (11, 27) | 142 (107, 177)    | 40 (24, 60) | 69 (51, 86)    | 17 (10, 24) | 126 (95, 157)  | 0.4 (0.3, 0.6) | 3.5 (2.6, 4.3)    | 0.2 (0.1, 0.3) | 0.8 (0.6, 1.0) |
| Netherlands | Men   | Overall           | 5.69  | 0.4 (0.3, 0.5) | 26 (25, 28) | 68 (41, 100)  | 133 (107, 157)    | 27 (17, 39) | 228 (177, 282)    | 12 (7, 18)  | 23 (19, 28)    | 5 (3, 7)    | 40 (31, 50)    | 0.5 (0.3, 0.8) | 4.6 (3.7, 5.4)    | 0.2 (0.1, 0.4) | 1.0 (0.8, 1.2) |
| Netherlands | Both  | Overall           | 11.7  | 0.4 (0.3, 0.5) | 26 (25, 28) | 120 (70, 172) | 249 (211, 287)    | 53 (32, 75) | 422 (332, 514)    | 10 (6, 15)  | 21 (18, 25)    | 5 (3, 6)    | 36 (29, 44)    | 0.4 (0.3, 0.6) | 3.8 (3.2, 4.4)    | 0.2 (0.1, 0.3) | 0.8 (0.7, 1.0) |
| New Zealand | Women | Ages 20 to 44     | 0.285 | 0.2 (0.2, 0.3) | 26 (25, 27) | 0 (0, 0)      | 1 (0, 1)          | 0 (0, 0)    | 1 (1, 1)          | 0 (0, 0)    | 1 (1, 2)       | 0 (0, 0)    | 2 (1, 2)       | 1.1 (0.6, 1.6) | 8.7 (5.8, 11.4)   | 0.2 (0.1, 0.3) | 1.0 (0.7, 1.2) |
| New Zealand | Women | Ages 45 to 64     | 0.562 | 0.1 (0.1, 0.1) | 29 (28, 30) | 1 (1, 2)      | 4 (3, 6)          | 1 (1, 1)    | 6 (5, 8)          | 2 (1, 3)    | 8 (5, 10)      | 2 (1, 2)    | 12 (8, 15)     | 0.7 (0.4, 1.0) | 5.4 (3.6, 7.2)    | 0.2 (0.1, 0.3) | 0.8 (0.6, 1.1) |
| New Zealand | Women | Ages 65 and older | 0.63  | 0.1 (0.1, 0.1) | 28 (27, 29) | 9 (5, 15)     | 13 (10, 17)       | 3 (2, 4)    | 25 (18, 33)       | 30 (16, 48) | 42 (31, 54)    | 8 (5, 12)   | 81 (58, 107)   | 0.2 (0.1, 0.4) | 2.3 (1.7, 3.0)    | 0.2 (0.1, 0.2) | 0.4 (0.3, 0.5) |
| New Zealand | Women | Overall           | 1.48  | 0.1 (0.1, 0.2) | 28 (26, 29) | 11 (6, 17)    | 18 (14, 22)       | 4 (2, 5)    | 33 (25, 42)       | 7 (4, 11)   | 12 (10, 15)    | 3 (2, 4)    | 22 (17, 28)    | 0.3 (0.1, 0.4) | 2.8 (2.2, 3.4)    | 0.2 (0.1, 0.3) | 0.5 (0.4, 0.6) |
| New Zealand | Men   | Ages 20 to 44     | 0.272 | 0.2 (0.2, 0.3) | 27 (26, 28) | 1 (0, 1)      | 1 (1, 2)          | 0 (0, 0)    | 2 (1, 2)          | 1 (1, 2)    | 2 (1, 3)       | 0 (0, 0)    | 3 (3, 4)       | 1.1 (0.6, 1.5) | 8.9 (6.0, 12.1)   | 0.2 (0.1, 0.3) | 1.9 (1.4, 2.5) |
| New Zealand | Men   | Ages 45 to 64     | 0.537 | 0.1 (0.1, 0.1) | 29 (28, 30) | 4 (2, 6)      | 8 (6, 11)         | 1 (1, 1)    | 13 (10, 17)       | 8 (5, 11)   | 15 (11, 20)    | 2 (1, 3)    | 25 (19, 32)    | 0.7 (0.4, 1.0) | 5.7 (4.0, 7.5)    | 0.2 (0.1, 0.3) | 1.2 (0.9, 1.6) |
| New Zealand | Men   | Ages 65 and older | 0.55  | 0.1 (0.1, 0.1) | 28 (27, 29) | 10 (6, 15)    | 16 (11, 20)       | 3 (2, 4)    | 28 (21, 37)       | 39 (22, 59) | 60 (44, 76)    | 11 (7, 16)  | 110 (81, 143)  | 0.3 (0.2, 0.5) | 2.7 (2.0, 3.4)    | 0.1 (0.1, 0.2) | 0.6 (0.4, 0.7) |
| New Zealand | Men   | Overall           | 1.36  | 0.2 (0.1, 0.2) | 28 (27, 29) | 15 (9, 22)    | 25 (20, 30)       | 4 (2, 6)    | 44 (33, 55)       | 11 (6, 1    |                |             |                |                |                   |                |                |

|                                |       |                   |       |                |             |                |                   |             |                   |              |                |            |                |                |                   |                |                |
|--------------------------------|-------|-------------------|-------|----------------|-------------|----------------|-------------------|-------------|-------------------|--------------|----------------|------------|----------------|----------------|-------------------|----------------|----------------|
| Nigeria                        | Women | Ages 20 to 44     | 11.4  | 0.5 (0.2, 0.8) | 23 (23, 24) | 15 (7, 23)     | 232 (166, 297)    | 1 (1, 2)    | 248 (181, 316)    | 1 (0, 1)     | 13 (9, 16)     | 0 (0, 0)   | 13 (10, 17)    | 0.8 (0.4, 1.3) | 12.3 (8.8, 15.7)  | 0.2 (0.1, 0.3) | 6.4 (4.7, 8.2) |
| Nigeria                        | Women | Ages 45 to 64     | 8.46  | 0.2 (0.1, 0.4) | 24 (23, 25) | 31 (16, 47)    | 379 (252, 508)    | 3 (2, 5)    | 413 (287, 543)    | 4 (2, 6)     | 45 (30, 60)    | 0 (0, 1)   | 49 (34, 64)    | 0.4 (0.2, 0.6) | 6.4 (4.3, 8.6)    | 0.2 (0.1, 0.3) | 3.0 (2.1, 4.0) |
| Nigeria                        | Women | Ages 65 and older | 10    | 0.2 (0.1, 0.3) | 23 (22, 24) | 50 (25, 76)    | 501 (331, 678)    | 3 (1, 5)    | 555 (381, 728)    | 17 (9, 27)   | 174 (115, 236) | 1 (0, 2)   | 193 (133, 253) | 0.2 (0.1, 0.3) | 3.7 (2.5, 5.0)    | 0.2 (0.1, 0.3) | 1.6 (1.1, 2.1) |
| Nigeria                        | Women | Overall           | 29.9  | 0.3 (0.1, 0.5) | 24 (23, 24) | 96 (49, 144)   | 1113 (889, 1334)  | 7 (4, 11)   | 1216 (974, 1450)  | 3 (2, 5)     | 173 (130, 215) | 0 (0, 0)   | 214 (154, 273) | 0.3 (0.1, 0.4) | 5.2 (4.2, 6.3)    | 0.2 (0.1, 0.3) | 2.3 (1.9, 2.8) |
| Nigeria                        | Men   | Ages 20 to 44     | 11.8  | 0.5 (0.1, 0.9) | 23 (22, 24) | 16 (8, 25)     | 154 (111, 194)    | 1 (0, 1)    | 171 (126, 214)    | 1 (0, 1)     | 8 (6, 10)      | 0 (0, 0)   | 9 (7, 11)      | 0.8 (0.4, 1.3) | 13.0 (9.3, 16.3)  | 0.1 (0.1, 0.2) | 5.4 (4.0, 6.7) |
| Nigeria                        | Men   | Ages 45 to 64     | 8.04  | 0.3 (0.1, 0.4) | 24 (22, 25) | 27 (14, 40)    | 303 (197, 400)    | 2 (1, 3)    | 332 (224, 431)    | 3 (2, 5)     | 38 (24, 50)    | 0 (0, 0)   | 41 (28, 54)    | 0.4 (0.2, 0.6) | 6.6 (4.3, 8.7)    | 0.1 (0.1, 0.2) | 3.1 (2.1, 4.0) |
| Nigeria                        | Men   | Ages 65 and older | 9.98  | 0.2 (0.1, 0.3) | 23 (21, 24) | 33 (17, 50)    | 322 (210, 428)    | 2 (1, 3)    | 357 (239, 468)    | 13 (7, 20)   | 129 (84, 171)  | 1 (0, 1)   | 143 (95, 187)  | 0.2 (0.1, 0.3) | 4.0 (2.6, 5.3)    | 0.1 (0.1, 0.2) | 1.6 (1.1, 2.1) |
| Nigeria                        | Men   | Overall           | 29.8  | 0.3 (0.1, 0.6) | 23 (22, 24) | 76 (39, 114)   | 779 (624, 936)    | 5 (3, 8)    | 860 (695, 1019)   | 3 (1, 4)     | 26 (21, 31)    | 0 (0, 0)   | 29 (23, 34)    | 0.3 (0.2, 0.5) | 5.6 (4.5, 6.7)    | 0.1 (0.1, 0.2) | 2.3 (1.9, 2.8) |
| Nigeria                        | Both  | Overall           | 59.7  | 0.3 (0.1, 0.5) | 23 (22, 24) | 171 (88, 260)  | 1892 (1619, 2171) | 12 (6, 18)  | 2076 (1772, 2375) | 3 (1, 4)     | 32 (27, 36)    | 0 (0, 0)   | 35 (30, 40)    | 0.3 (0.2, 0.5) | 5.4 (4.6, 6.2)    | 0.2 (0.1, 0.2) | 2.3 (2.0, 2.7) |
| Norway                         | Women | Ages 20 to 44     | 0.302 | 0.8 (0.6, 1.0) | 25 (24, 26) | 0 (0, 0)       | 2 (1, 2)          | 0 (0, 0)    | 2 (2, 3)          | 0 (0, 0)     | 3 (2, 3)       | 0 (0, 0)   | 3 (2, 4)       | 1.8 (1.1, 2.6) | 16.4 (11.6, 21.1) | 0.4 (0.2, 0.5) | 2.6 (1.9, 3.2) |
| Norway                         | Women | Ages 45 to 64     | 0.611 | 0.4 (0.3, 0.4) | 27 (25, 28) | 2 (1, 2)       | 4 (3, 5)          | 2 (1, 2)    | 7 (5, 9)          | 3 (2, 4)     | 6 (4, 8)       | 2 (1, 4)   | 12 (9, 15)     | 1.0 (0.6, 1.5) | 8.3 (5.6, 10.8)   | 0.3 (0.2, 0.4) | 0.9 (0.7, 1.2) |
| Norway                         | Women | Ages 65 and older | 0.764 | 0.3 (0.2, 0.3) | 27 (26, 28) | 18 (8, 30)     | 22 (15, 28)       | 5 (3, 7)    | 45 (31, 60)       | 44 (20, 72)  | 53 (37, 69)    | 11 (6, 16) | 108 (74, 146)  | 0.3 (0.2, 0.5) | 2.9 (2.0, 3.8)    | 0.2 (0.1, 0.3) | 0.5 (0.4, 0.7) |
| Norway                         | Women | Overall           | 1.68  | 0.5 (0.4, 0.6) | 26 (25, 27) | 20 (10, 32)    | 27 (20, 34)       | 6 (4, 9)    | 54 (39, 71)       | 12 (6, 19)   | 16 (12, 20)    | 4 (2, 5)   | 32 (23, 42)    | 0.4 (0.2, 0.6) | 3.4 (2.5, 4.2)    | 0.2 (0.1, 0.4) | 0.6 (0.4, 0.8) |
| Norway                         | Men   | Ages 20 to 44     | 0.312 | 0.9 (0.7, 1.1) | 26 (25, 27) | 1 (1, 2)       | 5 (3, 6)          | 0 (0, 0)    | 6 (5, 8)          | 2 (1, 2)     | 7 (5, 9)       | 0 (0, 0)   | 9 (7, 11)      | 2.2 (1.3, 3.1) | 18.4 (12.9, 23.3) | 0.3 (0.2, 0.5) | 6.6 (4.8, 8.2) |
| Norway                         | Men   | Ages 45 to 64     | 0.633 | 0.4 (0.3, 0.5) | 28 (27, 29) | 7 (4, 10)      | 11 (7, 14)        | 2 (1, 3)    | 20 (15, 26)       | 11 (7, 16)   | 17 (12, 23)    | 3 (2, 4)   | 31 (23, 40)    | 1.1 (0.7, 1.6) | 8.7 (5.9, 11.4)   | 0.3 (0.1, 0.4) | 1.6 (1.2, 2.1) |
| Norway                         | Men   | Ages 65 and older | 0.689 | 0.3 (0.2, 0.3) | 27 (26, 28) | 18 (10, 27)    | 21 (16, 26)       | 5 (3, 7)    | 44 (32, 56)       | 55 (31, 84)  | 66 (49, 82)    | 15 (9, 22) | 137 (99, 175)  | 0.4 (0.2, 0.6) | 3.6 (2.7, 4.5)    | 0.2 (0.1, 0.3) | 0.7 (0.5, 0.9) |
| Norway                         | Men   | Overall           | 1.63  | 0.6 (0.4, 0.7) | 27 (26, 28) | 26 (15, 38)    | 37 (30, 44)       | 7 (4, 10)   | 70 (54, 88)       | 16 (9, 23)   | 23 (18, 27)    | 4 (3, 6)   | 43 (33, 54)    | 0.5 (0.3, 0.8) | 5.0 (4.1, 5.9)    | 0.2 (0.1, 0.3) | 0.9 (0.7, 1.2) |
| Norway                         | Both  | Overall           | 3.31  | 0.5 (0.4, 0.6) | 27 (26, 28) | 46 (26, 68)    | 64 (54, 74)       | 13 (8, 19)  | 124 (94, 156)     | 14 (8, 21)   | 19 (16, 22)    | 4 (2, 6)   | 37 (28, 47)    | 0.4 (0.2, 0.6) | 4.2 (3.5, 4.8)    | 0.2 (0.1, 0.3) | 0.7 (0.6, 0.9) |
| Occupied Palestinian Territory | Women | Ages 20 to 44     | 0.282 | 0.4 (0.1, 0.6) | 27 (26, 29) | 1 (0, 1)       | 3 (2, 4)          | 0 (0, 0)    | 4 (3, 5)          | 1 (1, 2)     | 7 (5, 8)       | 1 (0, 1)   | 8 (6, 10)      | 1.5 (0.9, 2.3) | 11.3 (8.3, 14.2)  | 0.3 (0.2, 0.4) | 2.6 (2.0, 3.3) |
| Occupied Palestinian Territory | Women | Ages 45 to 64     | 0.193 | 0.2 (0.1, 0.3) | 32 (30, 34) | 2 (1, 2)       | 7 (5, 9)          | 0 (0, 0)    | 9 (6, 11)         | 8 (5, 12)    | 34 (24, 45)    | 2 (1, 2)   | 44 (32, 57)    | 0.9 (0.5, 1.3) | 6.5 (4.5, 8.6)    | 0.2 (0.1, 0.3) | 2.1 (1.5, 2.7) |
| Occupied Palestinian Territory | Women | Ages 65 and older | 0.254 | 0.1 (0.0, 0.2) | 30 (26, 33) | 2 (1, 3)       | 10 (7, 13)        | 0 (0, 0)    | 13 (9, 16)        | 38 (23, 55)  | 174 (123, 225) | 4 (2, 6)   | 216 (157, 272) | 0.4 (0.2, 0.5) | 3.6 (2.5, 4.6)    | 0.2 (0.1, 0.3) | 1.4 (1.0, 1.7) |
| Occupied Palestinian Territory | Women | Overall           | 0.729 | 0.2 (0.1, 0.4) | 29 (27, 32) | 4 (3, 6)       | 20 (16, 24)       | 1 (1, 1)    | 25 (20, 30)       | 6 (4, 9)     | 27 (22, 33)    | 1 (1, 2)   | 35 (28, 42)    | 0.5 (0.3, 0.8) | 4.9 (3.9, 5.7)    | 0.2 (0.1, 0.4) | 1.7 (1.4, 2.0) |
| Occupied Palestinian Territory | Men   | Ages 20 to 44     | 0.291 | 0.4 (0.1, 0.7) | 25 (24, 27) | 3 (2, 4)       | 6 (4, 8)          | 0 (0, 0)    | 9 (7, 11)         | 5 (3, 8)     | 12 (9, 16)     | 0 (0, 1)   | 18 (14, 23)    | 1.5 (0.9, 2.1) | 11.9 (8.7, 15.1)  | 0.2 (0.1, 0.2) | 3.3 (2.5, 4.1) |
| Occupied Palestinian Territory | Men   | Ages 45 to 64     | 0.194 | 0.2 (0.1, 0.4) | 28 (26, 29) | 6 (3, 8)       | 9 (6, 12)         | 0 (0, 0)    | 15 (11, 19)       | 29 (17, 41)  | 48 (33, 64)    | 2 (1, 2)   | 79 (58, 99)    | 0.9 (0.5, 1.3) | 6.6 (4.5, 8.7)    | 0.1 (0.1, 0.2) | 1.8 (1.3, 2.2) |
| Occupied Palestinian Territory | Men   | Ages 65 and older | 0.251 | 0.2 (0.1, 0.3) | 27 (25, 29) | 4 (3, 6)       | 10 (7, 13)        | 0 (0, 0)    | 15 (11, 19)       | 86 (52, 122) | 191 (129, 250) | 6 (4, 8)   | 283 (204, 361) | 0.5 (0.3, 0.7) | 4.0 (2.7, 5.2)    | 0.2 (0.1, 0.3) | 1.2 (0.9, 1.5) |
| Occupied Palestinian Territory | Men   | Overall           | 0.735 | 0.3 (0.1, 0.4) | 27 (25, 28) | 13 (8, 18)     | 25 (20, 30)       | 1 (0, 1)    | 39 (30, 47)       | 17 (11, 24)  | 35 (28, 41)    | 1 (1, 2)   | 53 (41, 64)    | 0.7 (0.4, 1.0) | 5.7 (4.6, 6.8)    | 0.2 (0.1, 0.2) | 1.6 (1.3, 2.0) |
| Occupied Palestinian Territory | Both  | Overall           | 1.46  | 0.2 (0.1, 0.4) | 28 (26, 30) | 17 (10, 24)    | 45 (39, 52)       | 2 (1, 2)    | 64 (52, 76)       | 12 (7, 16)   | 31 (27, 35)    | 1 (1, 2)   | 44 (36, 52)    | 0.7 (0.4, 0.9) | 5.3 (4.6, 6.0)    | 0.2 (0.1, 0.3) | 1.7 (1.4, 2.0) |
| Oman                           | Women | Ages 20 to 44     | 0.24  | 0.7 (0.2, 1.1) | 26 (25, 27) | 0 (0, 1)       | 3 (2, 4)          | 0 (0, 0)    | 4 (3, 5)          | 1 (1, 2)     | 9 (6, 11)      | 0 (0, 0)   | 10 (7, 13)     | 2.1 (1.3, 3.1) | 15.1 (10.5, 19.4) | 0.4 (0.2, 0.6) | 6.2 (4.5, 7.9) |
| Oman                           | Women | Ages 45 to 64     | 0.112 | 0.4 (0.1, 0.6) | 28 (26, 30) | 1 (1, 2)       | 12 (8, 16)        | 0 (0, 0)    | 13 (9, 17)        | 11 (6, 16)   | 108 (75, 143)  | 1 (1, 2)   | 120 (84, 156)  | 1.2 (0.7, 1.7) | 8.7 (6.1, 11.5)   | 0.4 (0.2, 0.5) | 5.8 (4.1, 7.6) |
| Oman                           | Women | Ages 65 and older | 0.164 | 0.3 (0.1, 0.5) | 25 (23, 26) | 2 (1, 2)       | 14 (10, 17)       | 0 (0, 0)    | 15 (11, 19)       | 48 (31, 65)  | 389 (277, 495) | 2 (1, 3)   | 439 (326, 551) | 0.3 (0.2, 0.4) | 3.7 (2.6, 4.7)    | 0.3 (0.2, 0.4) | 1.9 (1.4, 2.4) |
| Oman                           | Women | Overall           | 0.516 | 0.4 (0.1, 0.8) | 26 (24, 28) | 3 (2, 5)       | 29 (23, 35)       | 0 (0, 0)    | 33 (27, 39)       | 6 (4, 9)     | 56 (45, 67)    | 1 (0, 1)   | 63 (51, 75)    | 0.5 (0.3, 0.7) | 5.5 (4.4, 6.6)    | 0.3 (0.2, 0.5) | 3.0 (2.4, 3.5) |
| Oman                           | Men   | Ages 20 to 44     | 0.444 | 0.7 (0.2, 1.3) | 26 (25, 27) | 3 (2, 4)       | 8 (5, 11)         | 0 (0, 0)    | 11 (8, 14)        | 4 (2, 6)     | 12 (8, 16)     | 0 (0, 0)   | 16 (11, 20)    | 2.2 (1.3, 3.1) | 15.7 (10.5, 20.9) | 0.3 (0.2, 0.5) | 6.3 (4.4, 8.0) |
| Oman                           | Men   | Ages 45 to 64     | 0.178 | 0.4 (0.1, 0.6) | 27 (26, 29) | 3 (2, 4)       | 30 (21, 39)       | 0 (0, 0)    | 34 (25, 44)       | 23 (14, 33)  | 168 (119, 222) | 1 (0, 1)   | 193 (140, 248) | 1.2 (0.7, 1.7) | 8.8 (6.2, 11.6)   | 0.3 (0.2, 0.5) | 5.8 (4.2, 7.4) |
| Oman                           | Men   | Ages 65 and older | 0.278 | 0.3 (0.1, 0.5) | 25 (24, 26) | 4 (3, 6)       | 20 (14, 26)       | 0 (0, 0)    | 23 (16, 28)       | 75 (50, 101) | 554 (385, 717) | 2 (1, 3)   | 631 (456, 797) | 0.4 (0.3, 0.5) | 4.2 (2.9, 5.5)    | 0.3 (0.2, 0.4) | 2.2 (1.6, 2.8) |
| Oman                           | Men   | Overall           | 0.9   | 0.5 (0.1, 0.8) | 26 (25, 27) | 9 (6, 13)      | 58 (47, 70)       | 0 (0, 0)    | 68 (55, 81)       | 11 (7, 15)   | 64 (52, 77)    | 0 (0, 0)   | 75 (61, 90)    | 0.8 (0.5, 1.2) | 6.7 (5.5, 8.1)    | 0.3 (0.2, 0.4) | 3.8 (3.1, 4.5) |
| Oman                           | Both  | Overall           | 1.42  | 0.5 (0.1, 0.8) | 26 (24, 27) | 13 (8, 18)     | 87 (75, 100)      | 1 (0, 1)    | 100 (86, 116)     | 9 (6, 12)    | 61 (53, 70)    | 0 (0, 1)   | 71 (61, 82)    | 0.7 (0.5, 1.0) | 6.3 (5.4, 7.2)    | 0.3 (0.2, 0.5) | 3.5 (3.0, 4.0) |
| Pakistan                       | Women | Ages 20 to 44     | 13.4  | 0.5 (0.1, 0.8) | 23 (22, 25) | 35 (17, 54)    | 299 (203, 388)    | 7 (4, 11)   | 341 (244, 428)    | 2 (1, 2)     | 13 (9, 17)     | 0 (0, 1)   | 15 (11, 19)    | 0.7 (0.4, 1.2) | 11.6 (7.9, 15.0)  | 0.2 (0.1, 0.4) | 3.4 (2.4, 4.2) |
| Pakistan                       | Women | Ages 45 to 64     | 10.8  | 0.2 (0.1, 0.4) | 24 (22, 26) | 57 (28, 87)    | 657 (429, 875)    | 16 (8, 25)  | 729 (498, 958)    | 5 (3, 8)     | 61 (40, 81)    | 1 (1, 2)   | 68 (46, 89)    | 0.4 (0.2, 0.6) | 3.3 (4.1, 8.5)    | 0.2 (0.1, 0.3) | 2.4 (1.7, 3.2) |
| Pakistan                       | Women | Ages 65 and older | 12.8  | 0.2 (0.0, 0.3) | 22 (20, 24) | 104 (52, 160)  | 794 (553, 1064)   | 12 (6, 18)  | 909 (658, 1195)   | 29 (15, 45)  | 221 (154, 296) | 3 (1, 5)   | 253 (183, 332) | 0.2 (0.1, 0.3) | 6.5 (2.4, 4.7)    | 0.2 (0.1, 0.3) | 1.2 (0.9, 1.6) |
| Pakistan                       | Women | Overall           | 37    | 0.3 (0.1, 0.5) | 23 (21, 25) | 195 (99, 296)  | 1750 (1404, 2105) | 35 (18, 53) | 1980 (1602, 2374) | 5 (3, 8)     | 47 (38, 57)    | 1 (0, 1)   | 54 (43, 64)    | 0.3 (0.1, 0.4) | 4.9 (3.9, 5.9)    | 0.2 (0.1, 0.3) | 1.7 (1.4, 2.1) |
| Pakistan                       | Men   | Ages 20 to 44     | 13.6  | 0.5 (0.1, 0.9) | 22 (21, 23) | 50 (26, 79)    | 358 (257, 459)    | 5 (2, 8)    | 413 (303, 523)    | 2 (1, 3)     | 16 (11, 20)    | 0 (0, 0)   | 18 (13, 23)    | 0.8 (0.4, 1.2) | 12.1 (8.6, 15.4)  | 0.3 (0.1, 0.4) | 4.0 (2.9, 5.1) |
| Pakistan                       | Men   | Ages 45 to 64     | 11.1  | 0.2 (0.1, 0.4) | 23 (21, 24) | 91 (47, 139)   | 666 (441, 903)    | 9 (4, 14)   | 766 (541, 1010)   | 8 (4, 13)    | 60 (40, 82)    | 1 (0, 1)   | 69 (49, 91)    | 0.4 (0.2, 0.6) | 6.7 (4.4, 9.1)    | 0.3 (0.1, 0.4) | 2.3 (1.6, 3.0) |
| Pakistan                       | Men   | Ages 65 and older | 13.3  | 0.2 (0.1, 0.3) | 21 (20, 23) | 89 (46, 135)   | 587 (377, 802)    | 6 (3, 10)   | 682 (460, 911)    | 23 (12, 35)  | 151 (97, 207)  | 2 (1, 3)   | 176 (119, 235) | 0.2 (0.1, 0.3) | 3.0 (1.9, 4.1)    | 0.2 (0.1, 0.3) | 1.0 (0.7, 1.3) |
| Pakistan                       | Men   | Overall           | 38    | 0.3 (0.1, 0.5) | 22 (20, 23) | 230 (119, 352) | 1612 (1293, 1948) | 20 (10, 30) | 1862 (1511, 2237) | 6 (3, 9)     | 42 (34, 51)    | 1 (0, 1)   | 49 (40, 59)    | 0.3 (0.1, 0.4) | 4.9 (4.0, 6.0)    | 0.2 (0.1, 0.4) | 1.6 (1.3, 2.0) |
| Pakistan                       | Both  | Overall           | 74.9  | 0.3 (0.1, 0.5) | 23 (21, 24) | 425 (219, 638) | 3361 (2866, 3846) | 55 (28, 83) | 3842 (3252, 4430) | 6 (3, 9)     | 45 (38, 51)    | 1 (0, 1)   | 51 (43, 59)    | 0.3 (0.1, 0.4) | 4.9 (4.2, 5.6)    | 0.2 (0.1, 0.3) | 1.7 (1.4, 1.9) |
| Panama                         | Women | Ages 20 to 44     | 0.269 | 0.9 (0.3, 1.6) | 27 (25, 29) | 0 (0, 1)       | 3 (2, 3)          | 0 (0, 0)    | 3 (3, 4)          | 1 (1, 1)     | 5 (4, 6)       | 0 (0, 1)   | 6 (5, 8)       | 2.7 (1.6, 4.0) | 19.6 (14.7, 24.8) | 0.8 (0.4, 1.2) | 5.5 (4.2, 6.9) |
| Panama                         | Women | Ages 45 to 64     | 0.309 | 0.5 (0.2, 0.8) | 29 (27, 31) | 2 (1, 3)       | 17 (12, 23)       | 1 (0, 1)    | 20 (14, 26)       | 6 (4, 9)     | 57 (38, 74)    | 2 (1, 3)   | 65 (46, 84)    | 1.3 (0.8, 1.9) | 9.9 (6.6, 13.1)   | 0.5 (0.3, 0.8) | 4.8 (3.4, 6.2) |
| Panama                         | Women | Ages 65 and older | 0.37  | 0.4 (0.1, 0.6) | 27 (25, 29) | 6 (3, 9)       | 36 (26, 46)       | 1 (1, 2)    | 43 (33, 53)       | 48 (28, 72)  | 297 (216, 374) | 9 (5, 14)  | 355 (269, 438) | 0.5 (0.3, 0.7) | 4.6 (3.4, 5.8)    | 0.4 (0.2, 0.6) | 2.1 (1.6, 2.5) |
| Panama                         | Women | Overall           | 0.948 | 0.6 (0.2, 1.3) | 28 (26, 29) | 8 (5, 12)      | 56 (44, 67)       | 2 (1, 3)    | 67 (53, 80)       | 5 (5, 13)    | 59 (47, 71)    | 2 (1, 3)   | 70 (56, 85)    | 0.6 (0.3, 0.8) | 5.8 (4.6, 6.9)    | 0.5 (0.3, 0.7) | 2.6 (2.1, 3.1) |
| Panama                         | Men   | Ages 20 to 44     | 0.276 | 1.0 (0.3, 1.7) | 26 (25, 28) | 1 (1, 2)       | 4 (3, 6)          | 0 (0, 0)    | 6 (4, 7)          | 2 (2, 4)     | 8 (6, 11)      | 0 (0, 0)   | 11 (8, 14)     | 2.6 (1.7, 3.8) | 19.6 (13.8, 25.4) | 0.4 (0.2, 0.6) | 7.0 (5.2, 8.8) |
| Panama                         | Men   | Ages 45 to 64     | 0.305 | 0.5 (0.2, 0.9) | 27 (26, 29) | 6 (4, 9)       | 25 (17, 32)       | 1 (0, 1)    | 31 (23, 40)       | 20 (12, 29)  | 80 (55, 10     |            |                |                |                   |                |                |

|             |       |                   |        |                |             |                |                   |             |                   |              |                |            |                |                |                   |                |                |
|-------------|-------|-------------------|--------|----------------|-------------|----------------|-------------------|-------------|-------------------|--------------|----------------|------------|----------------|----------------|-------------------|----------------|----------------|
| Paraguay    | Men   | Ages 65 and older | 0.506  | 0.2 (0.1, 0.3) | 25 (22, 29) | 11 (7, 15)     | 50 (35, 65)       | 1 (1, 2)    | 63 (46, 78)       | 71 (46, 98)  | 321 (224, 416) | 8 (5, 11)  | 400 (296, 499) | 0.4 (0.3, 0.6) | 3.9 (2.7, 5.0)    | 0.3 (0.2, 0.4) | 1.5 (1.1, 1.9) |
| Paraguay    | Men   | Overall           | 1.49   | 0.3 (0.1, 0.6) | 26 (22, 29) | 22 (14, 31)    | 97 (75, 117)      | 2 (1, 3)    | 121 (96, 145)     | 15 (9, 21)   | 65 (51, 78)    | 1 (1, 2)   | 81 (64, 97)    | 0.6 (0.4, 0.8) | 5.1 (4.0, 6.2)    | 0.3 (0.2, 0.4) | 2.1 (1.7, 2.5) |
| Paraguay    | Both  | Overall           | 2.98   | 0.3 (0.1, 0.6) | 26 (22, 30) | 40 (24, 56)    | 221 (188, 256)    | 5 (3, 7)    | 266 (224, 310)    | 13 (8, 19)   | 74 (63, 86)    | 2 (1, 2)   | 89 (75, 104)   | 0.5 (0.3, 0.8) | 4.7 (4.0, 5.4)    | 0.3 (0.2, 0.4) | 2.2 (1.8, 2.5) |
| <b>20</b>   |       |                   |        |                |             |                |                   |             |                   |              |                |            |                |                |                   |                |                |
| Peru        | Women | Ages 20 to 44     | 2.34   | 1.0 (0.3, 1.7) | 25 (25, 26) | 7 (5, 11)      | 22 (16, 28)       | 2 (1, 3)    | 32 (24, 39)       | 2 (1, 3)     | 5 (4, 7)       | 0 (0, 1)   | 8 (6, 9)       | 2.6 (1.6, 3.7) | 19.2 (14.1, 24.3) | 0.7 (0.4, 1.1) | 4.6 (3.5, 5.7) |
| Peru        | Women | Ages 45 to 64     | 2.32   | 0.5 (0.1, 0.8) | 27 (26, 28) | 14 (9, 20)     | 66 (44, 88)       | 7 (3, 10)   | 87 (63, 111)      | 6 (4, 9)     | 28 (19, 38)    | 3 (1, 4)   | 37 (27, 48)    | 1.3 (0.8, 1.9) | 9.6 (6.4, 12.8)   | 0.6 (0.3, 0.9) | 3.0 (2.2, 3.9) |
| Peru        | Women | Ages 65 and older | 2.83   | 0.3 (0.1, 0.6) | 26 (24, 27) | 32 (21, 43)    | 100 (73, 128)     | 9 (5, 14)   | 141 (107, 173)    | 33 (22, 45)  | 104 (76, 133)  | 9 (5, 14)  | 146 (112, 180) | 0.4 (0.3, 0.5) | 4.6 (3.3, 5.9)    | 0.5 (0.2, 0.7) | 1.1 (0.9, 1.4) |
| Peru        | Women | Overall           | 7.49   | 0.6 (0.2, 1.0) | 26 (25, 27) | 53 (35, 74)    | 188 (154, 223)    | 17 (10, 25) | 259 (211, 307)    | 7 (5, 10)    | 25 (21, 30)    | 2 (1, 3)   | 35 (28, 41)    | 0.6 (0.4, 0.8) | 6.3 (5.2, 7.5)    | 0.4 (0.3, 0.7) | 1.6 (1.3, 1.9) |
| Peru        | Men   | Ages 20 to 44     | 2.38   | 1.0 (0.3, 1.8) | 24 (23, 25) | 12 (8, 17)     | 30 (22, 37)       | 1 (0, 1)    | 42 (33, 52)       | 3 (2, 4)     | 7 (5, 9)       | 0 (0, 0)   | 10 (8, 12)     | 2.1 (1.4, 2.8) | 19.8 (14.8, 24.8) | 0.3 (0.2, 0.5) | 5.1 (3.9, 6.2) |
| Peru        | Men   | Ages 45 to 64     | 2.25   | 0.5 (0.1, 0.9) | 26 (25, 27) | 25 (15, 36)    | 84 (59, 109)      | 3 (2, 4)    | 111 (82, 140)     | 11 (7, 16)   | 37 (26, 48)    | 1 (1, 2)   | 49 (37, 62)    | 1.4 (0.8, 2.0) | 10.4 (7.3, 13.6)  | 0.3 (0.2, 0.5) | 3.8 (2.8, 4.8) |
| Peru        | Men   | Ages 65 and older | 2.69   | 0.4 (0.1, 0.7) | 25 (24, 26) | 30 (20, 40)    | 84 (59, 107)      | 4 (3, 5)    | 117 (89, 145)     | 37 (25, 49)  | 103 (73, 133)  | 5 (3, 6)   | 145 (110, 179) | 0.4 (0.3, 0.6) | 5.1 (3.6, 6.6)    | 0.2 (0.2, 0.4) | 1.2 (0.9, 1.5) |
| Peru        | Men   | Overall           | 7.62   | 0.7 (0.2, 1.2) | 25 (24, 26) | 67 (44, 90)    | 197 (161, 234)    | 7 (5, 9)    | 270 (222, 320)    | 9 (6, 12)    | 27 (22, 32)    | 1 (1, 1)   | 37 (30, 44)    | 0.7 (0.5, 1.0) | 7.6 (6.2, 9.0)    | 0.3 (0.2, 0.4) | 2.0 (1.6, 2.4) |
| Peru        | Both  | Overall           | 14.8   | 0.6 (0.2, 1.1) | 25 (24, 26) | 120 (79, 164)  | 385 (334, 435)    | 24 (16, 34) | 529 (449, 610)    | 8 (5, 11)    | 26 (23, 29)    | 2 (1, 2)   | 36 (30, 41)    | 0.6 (0.4, 0.9) | 6.9 (6.0, 7.8)    | 0.4 (0.3, 0.6) | 1.8 (1.5, 2.1) |
| Philippines | Women | Ages 20 to 44     | 7.18   | 0.8 (0.2, 1.3) | 23 (22, 24) | 29 (14, 45)    | 164 (116, 210)    | 3 (2, 5)    | 196 (144, 247)    | 2 (1, 4)     | 13 (9, 17)     | 0 (0, 0)   | 16 (11, 20)    | 1.1 (0.5, 1.7) | 15.6 (11.0, 20.0) | 0.2 (0.1, 0.3) | 3.7 (2.7, 4.7) |
| Philippines | Women | Ages 45 to 64     | 6.72   | 0.4 (0.1, 0.7) | 24 (23, 26) | 56 (28, 86)    | 596 (401, 797)    | 7 (4, 12)   | 660 (462, 854)    | 8 (4, 13)    | 89 (60, 119)   | 1 (1, 2)   | 98 (69, 127)   | 0.6 (0.3, 0.9) | 8.5 (5.7, 11.4)   | 0.2 (0.1, 0.3) | 3.3 (2.3, 4.3) |
| Philippines | Women | Ages 65 and older | 7.35   | 0.3 (0.1, 0.5) | 22 (21, 23) | 79 (41, 122)   | 498 (351, 660)    | 5 (2, 7)    | 581 (423, 749)    | 40 (21, 62)  | 254 (179, 336) | 2 (1, 4)   | 296 (215, 382) | 0.3 (0.1, 0.4) | 4.5 (3.2, 5.9)    | 0.1 (0.1, 0.2) | 1.3 (1.0, 1.7) |
| Philippines | Women | Overall           | 21.2   | 0.5 (0.2, 0.9) | 23 (22, 24) | 164 (85, 249)  | 1258 (1019, 1505) | 15 (8, 23)  | 1438 (1168, 1720) | 8 (4, 12)    | 59 (48, 71)    | 1 (0, 1)   | 68 (55, 81)    | 0.4 (0.2, 0.6) | 6.6 (5.3, 7.9)    | 0.2 (0.1, 0.2) | 2.1 (1.7, 2.5) |
| Philippines | Men   | Ages 20 to 44     | 7.31   | 0.8 (0.2, 1.4) | 23 (22, 24) | 82 (42, 127)   | 263 (170, 352)    | 2 (1, 3)    | 348 (248, 450)    | 7 (3, 10)    | 21 (13, 28)    | 0 (0, 0)   | 27 (20, 36)    | 1.1 (0.5, 1.7) | 15.7 (10.2, 21.1) | 0.1 (0.1, 0.2) | 3.5 (2.5, 4.6) |
| Philippines | Men   | Ages 45 to 64     | 6.32   | 0.4 (0.1, 0.8) | 23 (22, 24) | 134 (67, 205)  | 781 (514, 1031)   | 5 (2, 7)    | 919 (643, 1179)   | 21 (11, 32)  | 124 (81, 163)  | 1 (0, 1)   | 145 (102, 187) | 0.6 (0.3, 0.9) | 9.0 (5.9, 11.8)   | 0.1 (0.1, 0.2) | 2.9 (2.0, 3.7) |
| Philippines | Men   | Ages 65 and older | 6.77   | 0.3 (0.1, 0.5) | 21 (20, 22) | 85 (44, 127)   | 356 (241, 473)    | 3 (2, 5)    | 445 (313, 576)    | 60 (31, 89)  | 250 (168, 331) | 2 (1, 4)   | 312 (219, 404) | 0.3 (0.2, 0.4) | 4.9 (3.3, 6.5)    | 0.1 (0.0, 0.2) | 1.2 (0.8, 1.5) |
| Philippines | Men   | Overall           | 20.4   | 0.5 (0.2, 0.9) | 22 (21, 23) | 301 (157, 458) | 1400 (1094, 1694) | 10 (5, 15)  | 1712 (1355, 2068) | 15 (8, 22)   | 69 (54, 83)    | 0 (0, 1)   | 84 (66, 101)   | 0.5 (0.3, 0.8) | 7.9 (6.2, 9.6)    | 0.1 (0.1, 0.2) | 2.2 (1.7, 2.6) |
| Philippines | Both  | Overall           | 41.6   | 0.5 (0.2, 0.9) | 23 (22, 24) | 465 (242, 701) | 2659 (2280, 3078) | 25 (13, 37) | 3149 (2657, 3643) | 11 (6, 17)   | 64 (55, 74)    | 1 (0, 1)   | 76 (64, 87)    | 0.5 (0.2, 0.7) | 7.2 (6.2, 8.4)    | 0.1 (0.1, 0.2) | 2.1 (1.8, 2.5) |
| Poland      | Women | Ages 20 to 44     | 3.13   | 0.2 (0.1, 0.2) | 24 (23, 25) | 2 (1, 3)       | 5 (3, 6)          | 1 (0, 1)    | 7 (6, 9)          | 0 (0, 0)     | 1 (1, 1)       | 0 (0, 0)   | 1 (1, 2)       | 0.9 (0.6, 1.3) | 7.8 (5.4, 10.3)   | 0.2 (0.1, 0.3) | 1.0 (0.8, 1.3) |
| Poland      | Women | Ages 45 to 64     | 5.47   | 0.1 (0.0, 0.1) | 28 (27, 30) | 28 (17, 40)    | 43 (29, 58)       | 11 (6, 17)  | 82 (59, 107)      | 5 (3, 7)     | 8 (5, 11)      | 2 (1, 3)   | 15 (11, 19)    | 0.7 (0.4, 0.9) | 5.0 (3.4, 6.8)    | 0.2 (0.1, 0.3) | 0.8 (0.5, 1.0) |
| Poland      | Women | Ages 65 and older | 5.72   | 0.1 (0.0, 0.1) | 29 (28, 30) | 179 (100, 274) | 146 (107, 183)    | 25 (15, 37) | 350 (245, 458)    | 55 (31, 85)  | 45 (33, 57)    | 8 (4, 12)  | 108 (76, 142)  | 0.3 (0.1, 0.4) | 2.4 (1.7, 3.0)    | 0.2 (0.1, 0.3) | 0.4 (0.3, 0.5) |
| Poland      | Women | Overall           | 14.3   | 0.1 (0.1, 0.1) | 27 (26, 28) | 209 (121, 311) | 194 (152, 234)    | 37 (22, 53) | 439 (318, 570)    | 15 (8, 22)   | 14 (11, 16)    | 3 (2, 4)   | 31 (22, 40)    | 0.3 (0.2, 0.4) | 7.2 (2.2, 3.3)    | 0.2 (0.1, 0.3) | 0.4 (0.3, 0.5) |
| Poland      | Men   | Ages 20 to 44     | 3.21   | 0.2 (0.1, 0.2) | 26 (25, 26) | 12 (7, 17)     | 20 (13, 28)       | 1 (0, 1)    | 32 (23, 42)       | 2 (1, 3)     | 3 (2, 5)       | 0 (0, 0)   | 6 (4, 7)       | 1.0 (0.6, 1.5) | 8.2 (5.5, 11.4)   | 0.2 (0.1, 0.3) | 1.9 (1.4, 2.5) |
| Poland      | Men   | Ages 45 to 64     | 5.04   | 0.1 (0.1, 0.1) | 28 (27, 29) | 106 (64, 151)  | 97 (68, 128)      | 12 (7, 18)  | 216 (156, 285)    | 21 (13, 30)  | 19 (13, 25)    | 2 (1, 4)   | 43 (31, 57)    | 0.7 (0.4, 0.9) | 5.2 (3.6, 6.9)    | 0.2 (0.1, 0.3) | 0.9 (0.7, 1.2) |
| Poland      | Men   | Ages 65 and older | 4.48   | 0.1 (0.0, 0.1) | 27 (26, 28) | 149 (88, 216)  | 98 (70, 127)      | 18 (11, 26) | 266 (187, 354)    | 76 (45, 111) | 50 (36, 65)    | 9 (6, 14)  | 136 (96, 181)  | 0.4 (0.2, 0.5) | 2.8 (2.0, 3.7)    | 0.1 (0.1, 0.2) | 0.4 (0.3, 0.6) |
| Poland      | Men   | Overall           | 12.7   | 0.1 (0.1, 0.1) | 27 (26, 28) | 267 (160, 379) | 215 (171, 258)    | 32 (19, 45) | 513 (377, 657)    | 21 (13, 30)  | 17 (13, 20)    | 2 (1, 4)   | 40 (30, 52)    | 0.3 (0.2, 0.6) | 3.8 (3.1, 4.6)    | 0.1 (0.1, 0.2) | 0.6 (0.4, 0.8) |
| Poland      | Both  | Overall           | 27     | 0.1 (0.1, 0.1) | 27 (26, 28) | 476 (280, 683) | 408 (351, 471)    | 68 (40, 98) | 953 (706, 1214)   | 18 (10, 25)  | 15 (13, 17)    | 3 (1, 4)   | 35 (26, 45)    | 0.3 (0.2, 0.5) | 3.2 (2.8, 3.7)    | 0.2 (0.1, 0.3) | 0.5 (0.4, 0.6) |
| Portugal    | Women | Ages 20 to 44     | 0.768  | 0.4 (0.3, 0.4) | 24 (23, 26) | 0 (0, 1)       | 2 (1, 2)          | 0 (0, 1)    | 2 (2, 3)          | 0 (0, 0)     | 1 (1, 1)       | 0 (0, 0)   | 2 (1, 2)       | 1.1 (0.7, 1.6) | 10.1 (6.9, 13.6)  | 0.3 (0.2, 0.4) | 0.9 (0.7, 1.2) |
| Portugal    | Women | Ages 45 to 64     | 1.43   | 0.2 (0.1, 0.2) | 28 (27, 30) | 3 (2, 5)       | 13 (8, 17)        | 3 (1, 4)    | 19 (13, 24)       | 2 (1, 3)     | 9 (6, 12)      | 2 (1, 3)   | 13 (9, 17)     | 0.8 (0.5, 1.1) | 5.9 (3.9, 8.0)    | 0.2 (0.1, 0.3) | 1.0 (0.7, 1.3) |
| Portugal    | Women | Ages 65 and older | 1.93   | 0.1 (0.1, 0.1) | 29 (27, 30) | 39 (22, 60)    | 117 (89, 147)     | 9 (5, 12)   | 164 (126, 205)    | 35 (19, 54)  | 104 (79, 131)  | 8 (4, 11)  | 147 (113, 183) | 0.2 (0.1, 0.4) | 2.5 (1.9, 3.4)    | 0.2 (0.1, 0.3) | 0.7 (0.5, 0.8) |
| Portugal    | Women | Overall           | 4.13   | 0.2 (0.2, 0.3) | 27 (25, 28) | 43 (24, 65)    | 131 (102, 161)    | 12 (7, 16)  | 185 (145, 229)    | 3 (2, 4)     | 45 (35, 55)    | 3 (2, 4)   | 45 (31, 53)    | 0.3 (0.1, 0.4) | 2.7 (2.1, 3.2)    | 0.2 (0.1, 0.3) | 0.7 (0.5, 0.9) |
| Portugal    | Men   | Ages 20 to 44     | 0.785  | 0.4 (0.3, 0.5) | 26 (25, 27) | 2 (1, 3)       | 4 (2, 5)          | 0 (0, 1)    | 6 (5, 8)          | 1 (1, 2)     | 2 (2, 3)       | 0 (0, 0)   | 4 (3, 5)       | 1.3 (0.8, 2.0) | 10.9 (7.3, 14.4)  | 0.3 (0.2, 0.5) | 2.1 (1.5, 2.6) |
| Portugal    | Men   | Ages 45 to 64     | 1.33   | 0.2 (0.1, 0.2) | 28 (27, 29) | 10 (6, 14)     | 25 (16, 32)       | 4 (2, 6)    | 38 (28, 49)       | 7 (4, 10)    | 18 (12, 24)    | 3 (2, 4)   | 29 (21, 37)    | 0.8 (0.5, 1.1) | 6.1 (4.1, 8.0)    | 0.3 (0.2, 0.4) | 1.4 (1.0, 1.8) |
| Portugal    | Men   | Ages 65 and older | 1.6    | 0.1 (0.1, 0.2) | 27 (26, 28) | 31 (18, 47)    | 92 (67, 114)      | 10 (6, 14)  | 133 (100, 166)    | 39 (23, 58)  | 114 (84, 143)  | 13 (8, 18) | 166 (125, 208) | 0.3 (0.2, 0.4) | 2.9 (2.1, 3.6)    | 0.1 (0.1, 0.2) | 0.8 (0.6, 1.0) |
| Portugal    | Men   | Overall           | 3.72   | 0.2 (0.2, 0.3) | 27 (26, 28) | 43 (25, 63)    | 120 (95, 146)     | 15 (9, 21)  | 178 (138, 216)    | 12 (7, 17)   | 32 (26, 39)    | 4 (2, 6)   | 48 (37, 58)    | 0.4 (0.2, 0.5) | 3.3 (2.6, 4.0)    | 0.2 (0.1, 0.2) | 0.9 (0.7, 1.1) |
| Portugal    | Both  | Overall           | 7.85   | 0.2 (0.2, 0.3) | 27 (25, 28) | 86 (52, 123)   | 251 (211, 289)    | 26 (16, 37) | 363 (294, 435)    | 11 (7, 16)   | 32 (27, 37)    | 3 (2, 5)   | 46 (38, 55)    | 0.3 (0.2, 0.4) | 3.0 (2.5, 3.4)    | 0.2 (0.1, 0.3) | 0.8 (0.6, 0.9) |
| Qatar       | Women | Ages 20 to 44     | 0.116  | 0.6 (0.2, 1.0) | 28 (27, 29) | 0 (0, 0)       | 0 (0, 1)          | 0 (0, 0)    | 1 (0, 1)          | 0 (0, 0)     | 2 (2, 3)       | 0 (0, 0)   | 3 (2, 4)       | 2.0 (1.2, 2.9) | 14.5 (9.8, 18.9)  | 0.5 (0.3, 0.7) | 3.0 (2.1, 3.8) |
| Qatar       | Women | Ages 45 to 64     | 0.0499 | 0.3 (0.1, 0.6) | 31 (29, 32) | 0 (0, 0)       | 2 (1, 2)          | 0 (0, 0)    | 2 (1, 3)          | 4 (2, 5)     | 34 (24, 45)    | 2 (1, 2)   | 39 (28, 50)    | 1.1 (0.6, 1.5) | 8.4 (5.9, 11.1)   | 0.4 (0.2, 0.6) | 3.7 (2.7, 4.8) |
| Qatar       | Women | Ages 65 and older | 0.0807 | 0.2 (0.1, 0.4) | 28 (25, 31) | 0 (0, 0)       | 2 (2, 3)          | 0 (0, 0)    | 2 (2, 3)          | 32 (19, 46)  | 362 (257, 465) | 5 (3, 8)   | 399 (292, 507) | 0.5 (0.3, 0.7) | 3.6 (2.6, 4.7)    | 0.4 (0.2, 0.6) | 2.8 (2.0, 3.5) |
| Qatar       | Women | Overall           | 0.246  | 0.4 (0.1, 0.7) | 29 (27, 30) | 0 (0, 1)       | 4 (4, 5)          | 0 (0, 0)    | 5 (4, 6)          | 2 (1, 2)     | 18 (15, 21)    | 1 (0, 1)   | 20 (17, 24)    | 0.7 (0.4, 1.0) | 5.2 (4.2, 6.2)    | 0.4 (0.2, 0.6) | 3.1 (2.6, 3.7) |
| Qatar       | Men   | Ages 20 to 44     | 0.458  | 0.7 (0.2, 1.1) | 28 (27, 29) | 1 (0, 1)       | 3 (2, 3)          | 0 (0, 0)    | 3 (2, 4)          | 1 (1, 1)     | 3 (2, 4)       | 0 (0, 0)   | 4 (3, 5)       | 1.9 (1.1, 2.7) | 14.5 (9.7, 19.0)  | 0.4 (0.2, 0.6) | 4.5 (3.2, 5.7) |
| Qatar       | Men   | Ages 45 to 64     | 0.196  | 0.3 (0.1, 0.6) | 29 (28, 30) | 1 (1, 2)       | 9 (6, 12)         | 0 (0, 0)    | 11 (8, 14)        | 7 (5, 11)    | 47 (33, 60)    | 1 (0, 1)   | 55 (40, 69)    | 1.1 (0.7, 1.5) | 8.6 (6.0, 11.1)   | 0.3 (0.2, 0.5) | 4.4 (3.2, 5.6) |
| Qatar       | Men   | Ages 65 and older | 0.366  | 0.2 (0.1, 0.4) | 27 (26, 29) | 1 (0, 1)       | 5 (4, 7)          | 0 (0, 0)    | 6 (4, 8)          | 47 (28, 68)  | 450 (302, 590) | 5 (3, 7)   | 502 (347, 656) | 0.5 (0.3, 0.8) | 4.3 (2.9, 5.7)    | 0.3 (0.2, 0.5) | 3.0 (2.1, 4.0) |
| Qatar       | Men   | Overall           | 1.02   | 0.4 (0.1, 0.7) | 28 (27, 29) | 3 (2, 4)       | 17 (14, 21)       | 0 (0, 0)    | 20 (1             |              |                |            |                |                |                   |                |                |

|                                  |       |                   |         |                |             |                   |                  |               |                   |                |                 |             |                  |                |                   |                |                   |
|----------------------------------|-------|-------------------|---------|----------------|-------------|-------------------|------------------|---------------|-------------------|----------------|-----------------|-------------|------------------|----------------|-------------------|----------------|-------------------|
| Russian Federation               | Women | Overall           | 55.7    | 0.3 (0.1, 0.5) | 28 (27, 29) | 2322 (1348, 3366) | 723 (585, 867)   | 74 (104, 245) | 3219 (2128, 4359) | 42 (24, 60)    | 13 (11, 16)     | 3 (2, 4)    | 58 (38, 78)      | 0.4 (0.2, 0.6) | 5.3 (4.3, 6.4)    | 0.3 (0.1, 0.4) | 0.4 (0.3, 0.6)    |
| Russian Federation               | Men   | Ages 20 to 44     | 11.5    | 0.6 (0.2, 1.0) | 25 (25, 26) | 283 (176, 410)    | 128 (94, 164)    | 5 (3, 8)      | 416 (293, 557)    | 14 (8, 20)     | 6 (5, 8)        | 0 (0, 0)    | 20 (14, 27)      | 1.7 (1.1, 2.5) | 14.3 (10.6, 18.3) | 0.3 (0.2, 0.5) | 2.1 (1.5, 2.8)    |
| Russian Federation               | Men   | Ages 45 to 64     | 17.6    | 0.3 (0.1, 0.5) | 27 (27, 28) | 1249 (752, 1748)  | 184 (123, 247)   | 69 (41, 99)   | 1502 (961, 2047)  | 71 (43, 99)    | 10 (7, 14)      | 4 (2, 6)    | 85 (55, 116)     | 0.9 (0.6, 1.3) | 7.6 (5.1, 10.2)   | 0.3 (0.2, 0.5) | 0.9 (0.6, 1.3)    |
| Russian Federation               | Men   | Ages 65 and older | 15      | 0.2 (0.1, 0.3) | 27 (26, 28) | 1280 (752, 1845)  | 115 (76, 154)    | 80 (48, 113)  | 1474 (907, 2077)  | 226 (133, 326) | 20 (13, 27)     | 14 (8, 20)  | 260 (160, 367)   | 0.4 (0.3, 0.6) | 4.4 (2.9, 5.9)    | 0.2 (0.1, 0.3) | 0.4 (0.3, 0.6)    |
| Russian Federation               | Men   | Overall           | 44.1    | 0.4 (0.1, 0.6) | 26 (26, 27) | 2811 (1689, 4011) | 427 (348, 505)   | 154 (93, 218) | 3392 (2184, 4659) | 64 (38, 91)    | 10 (8, 11)      | 3 (2, 5)    | 77 (49, 106)     | 0.6 (0.4, 0.9) | 7.2 (5.9, 8.6)    | 0.3 (0.1, 0.4) | 0.7 (0.4, 0.9)    |
| Russian Federation               | Both  | Overall           | 99.8    | 0.3 (0.1, 0.6) | 27 (26, 28) | 5133 (3061, 7334) | 1150 (982, 1314) | 28 (197, 461) | 6611 (4353, 9069) | 51 (31, 73)    | 12 (10, 13)     | 3 (2, 5)    | 66 (44, 91)      | 0.5 (0.3, 0.7) | 5.9 (5.0, 6.7)    | 0.3 (0.2, 0.4) | 0.5 (0.3, 0.7)    |
| Rwanda                           | Women | Ages 20 to 44     | 0.839   | 0.6 (0.2, 1.0) | 23 (22, 24) | 1 (1, 2)          | 10 (7, 13)       | 0 (0, 0)      | 12 (9, 15)        | 1 (0, 1)       | 8 (6, 10)       | 0 (0, 0)    | 9 (6, 11)        | 0.9 (0.4, 1.5) | 13.1 (9.5, 17.0)  | 0.2 (0.1, 0.3) | 4.1 (3.1, 5.3)    |
| Rwanda                           | Women | Ages 45 to 64     | 0.534   | 0.3 (0.1, 0.5) | 22 (20, 23) | 3 (1, 4)          | 23 (15, 31)      | 1 (0, 1)      | 27 (18, 35)       | 5 (3, 8)       | 44 (29, 59)     | 1 (1, 2)    | 50 (34, 65)      | 0.5 (0.2, 0.7) | 6.8 (4.5, 9.2)    | 0.2 (0.1, 0.3) | 2.4 (1.6, 3.1)    |
| Rwanda                           | Women | Ages 65 and older | 0.656   | 0.2 (0.1, 0.3) | 20 (16, 23) | 0 (0, 0)          | 0 (0, 0)         | 0 (0, 0)      | 0 (0, 0)          | 0 (0, 0)       | 0 (0, 0)        | 0 (0, 0)    | 0 (0, 0)         | 0 (0, 0, 0)    | 0 (0, 0, 0)       | 0 (0, 0, 0)    | 0 (0, 0, 0)       |
| Rwanda                           | Women | Overall           | 2.02    | 0.4 (0.1, 0.6) | 21 (19, 24) | 4 (2, 6)          | 34 (25, 42)      | 1 (0, 1)      | 38 (28, 48)       | 2 (1, 3)       | 17 (12, 21)     | 0 (0, 1)    | 19 (14, 24)      | 0.2 (0.1, 0.2) | 3.0 (2.2, 3.8)    | 0.1 (0.1, 0.2) | 1.0 (0.7, 1.2)    |
| Rwanda                           | Men   | Ages 20 to 44     | 0.805   | 0.6 (0.2, 1.1) | 22 (20, 25) | 2 (1, 3)          | 22 (15, 29)      | 0 (0, 0)      | 24 (17, 31)       | 1 (1, 2)       | 18 (12, 23)     | 0 (0, 0)    | 19 (14, 25)      | 0.9 (0.5, 1.4) | 14.1 (9.8, 18.1)  | 0.4 (0.2, 0.6) | 7.0 (5.0, 8.9)    |
| Rwanda                           | Men   | Ages 45 to 64     | 0.485   | 0.3 (0.1, 0.5) | 23 (20, 26) | 3 (2, 5)          | 35 (24, 46)      | 1 (0, 1)      | 39 (27, 51)       | 7 (4, 11)      | 72 (49, 96)     | 1 (1, 2)    | 80 (56, 105)     | 0.4 (0.2, 0.7) | 7.3 (4.9, 9.7)    | 0.3 (0.2, 0.5) | 3.1 (2.1, 4.0)    |
| Rwanda                           | Men   | Ages 65 and older | 0.57    | 0.2 (0.1, 0.4) | 22 (19, 26) | 3 (2, 4)          | 27 (18, 36)      | 0 (0, 1)      | 30 (22, 40)       | 23 (12, 35)    | 212 (145, 283)  | 3 (2, 5)    | 238 (170, 312)   | 0.4 (0.1, 0.3) | 4.1 (2.8, 5.5)    | 0.3 (0.1, 0.4) | 1.5 (1.1, 2.0)    |
| Rwanda                           | Men   | Overall           | 1.86    | 0.4 (0.1, 0.7) | 23 (19, 26) | 8 (4, 12)         | 84 (67, 101)     | 1 (1, 2)      | 93 (76, 111)      | 4 (2, 7)       | 56 (36, 54)     | 1 (0, 1)    | 50 (41, 60)      | 0.2 (0.2, 0.5) | 6.5 (5.2, 7.8)    | 0.3 (0.2, 0.5) | 2.6 (2.1, 3.1)    |
| Rwanda                           | Both  | Overall           | 3.88    | 0.4 (0.1, 0.6) | 22 (19, 25) | 12 (6, 18)        | 118 (99, 136)    | 2 (1, 3)      | 131 (112, 153)    | 3 (2, 5)       | 30 (26, 35)     | 0 (0, 1)    | 34 (29, 39)      | 0.3 (0.1, 0.4) | 4.9 (4.1, 5.6)    | 0.2 (0.1, 0.3) | 1.7 (1.5, 2.0)    |
| Saint Lucia                      | Women | Ages 20 to 44     | 0.015   | 1.5 (0.4, 2.5) | 26 (24, 29) | 0 (0, 0)          | 1 (1, 1)         | 0 (0, 0)      | 1 (1, 1)          | 2 (1, 3)       | 37 (27, 47)     | 3 (2, 5)    | 43 (31, 53)      | 3.9 (2.3, 5.8) | 25.5 (18.1, 32.2) | 1.8 (0.9, 2.9) | 11.9 (8.6, 14.8)  |
| Saint Lucia                      | Women | Ages 45 to 64     | 0.0158  | 0.7 (0.2, 1.3) | 29 (26, 32) | 0 (0, 0)          | 3 (2, 4)         | 0 (0, 0)      | 3 (2, 4)          | 10 (6, 15)     | 191 (129, 246)  | 5 (3, 8)    | 206 (143, 263)   | 1.9 (1.2, 2.8) | 12.9 (8.7, 16.6)  | 0.8 (0.5, 1.3) | 9.8 (6.8, 12.6)   |
| Saint Lucia                      | Women | Ages 65 and older | 0.019   | 0.5 (0.2, 0.9) | 27 (24, 30) | 1 (0, 1)          | 8 (6, 9)         | 0 (0, 0)      | 8 (6, 10)         | 112 (59, 177)  | 133 (869, 1415) | 18 (10, 27) | 1262 (965, 1572) | 0.6 (0.3, 1.0) | 5.3 (4.1, 6.6)    | 0.6 (0.3, 0.9) | 3.6 (2.8, 4.5)    |
| Saint Lucia                      | Women | Overall           | 0.0498  | 0.9 (0.3, 1.6) | 27 (24, 30) | 1 (1, 1)          | 12 (9, 14)       | 0 (0, 0)      | 13 (10, 15)       | 19 (11, 30)    | 232 (190, 276)  | 6 (3, 8)    | 257 (210, 306)   | 0.7 (0.4, 1.1) | 6.8 (5.6, 8.1)    | 0.8 (0.5, 1.2) | 4.6 (3.8, 5.5)    |
| Saint Lucia                      | Men   | Ages 20 to 44     | 0.0144  | 1.6 (0.4, 2.8) | 24 (22, 26) | 0 (0, 0)          | 1 (1, 2)         | 0 (0, 0)      | 1 (1, 2)          | 4 (3, 6)       | 47 (34, 59)     | 1 (1, 1)    | 52 (39, 64)      | 3.3 (2.1, 4.7) | 26.3 (19.2, 33.0) | 0.7 (0.4, 1.1) | 14.0 (10.5, 17.3) |
| Saint Lucia                      | Men   | Ages 45 to 64     | 0.0141  | 0.8 (0.2, 1.4) | 25 (23, 28) | 0 (0, 1)          | 3 (2, 4)         | 0 (0, 0)      | 3 (2, 4)          | 28 (17, 41)    | 212 (144, 276)  | 4 (2, 6)    | 245 (176, 314)   | 1.9 (1.2, 2.8) | 13.7 (9.3, 17.8)  | 0.6 (0.4, 1.0) | 8.0 (5.7, 10.2)   |
| Saint Lucia                      | Men   | Ages 65 and older | 0.0165  | 0.6 (0.2, 1.0) | 25 (23, 27) | 1 (0, 1)          | 5 (3, 6)         | 0 (0, 0)      | 5 (4, 6)          | 108 (65, 157)  | 890 (660, 1123) | 14 (9, 21)  | 1012 (759, 1253) | 0.6 (0.4, 0.9) | 6.1 (4.5, 7.7)    | 0.4 (0.2, 0.6) | 3.3 (2.5, 4.1)    |
| Saint Lucia                      | Men   | Overall           | 0.045   | 1.0 (0.3, 1.8) | 25 (23, 27) | 1 (1, 2)          | 9 (7, 10)        | 0 (0, 0)      | 10 (8, 12)        | 24 (15, 33)    | 194 (158, 227)  | 4 (2, 5)    | 221 (183, 256)   | 0.9 (0.6, 1.3) | 8.7 (7.1, 10.2)   | 0.5 (0.3, 0.7) | 4.8 (4.0, 5.6)    |
| Saint Lucia                      | Both  | Overall           | 0.0948  | 1.0 (0.3, 1.7) | 26 (24, 28) | 2 (1, 3)          | 20 (18, 23)      | 0 (0, 1)      | 23 (19, 26)       | 21 (13, 31)    | 214 (185, 242)  | 5 (3, 7)    | 240 (205, 274)   | 0.8 (0.5, 1.2) | 7.5 (6.5, 8.5)    | 0.7 (0.4, 1.0) | 4.7 (4.0, 5.4)    |
| Saint Vincent and the Grenadines | Women | Ages 20 to 44     | 0.00865 | 1.6 (0.5, 2.8) | 26 (23, 30) | 0 (0, 0)          | 1 (1, 1)         | 0 (0, 0)      | 1 (1, 1)          | 4 (2, 6)       | 44 (32, 54)     | 2 (1, 2)    | 49 (37, 60)      | 4.3 (2.5, 6.6) | 27.7 (20.3, 34.3) | 0.9 (0.5, 1.3) | 12.8 (9.6, 15.7)  |
| Saint Vincent and the Grenadines | Women | Ages 45 to 64     | 0.01    | 0.8 (0.3, 1.4) | 29 (26, 33) | 0 (0, 0)          | 2 (1, 2)         | 0 (0, 0)      | 2 (2, 3)          | 18 (11, 26)    | 183 (133, 236)  | 5 (3, 8)    | 206 (152, 262)   | 2.1 (1.2, 3.0) | 14.1 (10.2, 18.1) | 0.8 (0.5, 1.2) | 8.4 (6.2, 10.6)   |
| Saint Vincent and the Grenadines | Women | Ages 65 and older | 0.011   | 0.6 (0.2, 1.0) | 28 (22, 33) | 1 (0, 1)          | 4 (3, 5)         | 0 (0, 0)      | 4 (3, 6)          | 165 (94, 243)  | 910 (679, 1141) | 19 (11, 29) | 1094 (828, 1357) | 0.8 (0.5, 1.2) | 6.1 (4.6, 7.7)    | 0.6 (0.4, 0.9) | 3.2 (2.4, 4.0)    |
| Saint Vincent and the Grenadines | Women | Overall           | 0.0297  | 1.0 (0.3, 1.8) | 28 (28, 32) | 1 (1, 1)          | 6 (5, 7)         | 0 (0, 0)      | 7 (6, 9)          | 31 (18, 45)    | 210 (172, 245)  | 5 (3, 7)    | 246 (204, 292)   | 1.0 (0.6, 1.4) | 8.2 (6.7, 9.6)    | 0.7 (0.4, 1.0) | 4.3 (3.5, 5.1)    |
| Saint Vincent and the Grenadines | Men   | Ages 20 to 44     | 0.00891 | 1.8 (0.5, 3.1) | 25 (22, 27) | 0 (0, 0)          | 1 (1, 1)         | 0 (0, 0)      | 1 (1, 1)          | 5 (3, 8)       | 40 (31, 50)     | 1 (1, 1)    | 46 (36, 57)      | 4.4 (2.6, 6.5) | 29.4 (22.5, 36.6) | 0.9 (0.6, 1.4) | 16.6 (12.8, 20.4) |
| Saint Vincent and the Grenadines | Men   | Ages 45 to 64     | 0.0105  | 0.9 (0.2, 1.5) | 26 (24, 29) | 0 (0, 0)          | 2 (1, 3)         | 0 (0, 0)      | 2 (2, 3)          | 32 (19, 47)    | 196 (142, 252)  | 4 (2, 6)    | 232 (173, 292)   | 2.1 (1.3, 3.1) | 14.6 (10.6, 18.9) | 0.8 (0.5, 1.2) | 8.0 (6.0, 10.1)   |
| Saint Vincent and the Grenadines | Men   | Ages 65 and older | 0.0108  | 0.6 (0.2, 1.1) | 25 (22, 29) | 0 (0, 1)          | 3 (2, 3)         | 0 (0, 0)      | 3 (2, 4)          | 139 (89, 193)  | 885 (552, 996)  | 10 (6, 15)  | 934 (690, 1163)  | 0.7 (0.5, 1.0) | 7.2 (5.1, 9.1)    | 0.4 (0.2, 0.6) | 3.3 (2.4, 4.1)    |
| Saint Vincent and the Grenadines | Men   | Overall           | 0.0303  | 1.1 (0.3, 2.0) | 25 (23, 28) | 1 (1, 1)          | 5 (4, 6)         | 0 (0, 0)      | 6 (5, 7)          | 29 (19, 41)    | 176 (143, 208)  | 3 (2, 4)    | 208 (169, 247)   | 1.1 (0.7, 1.5) | 10.1 (8.2, 12.0)  | 0.6 (0.4, 0.9) | 4.9 (3.9, 5.8)    |
| Saint Vincent and the Grenadines | Both  | Overall           | 0.06    | 1.1 (0.3, 1.9) | 27 (23, 30) | 2 (1, 3)          | 12 (10, 13)      | 0 (0, 0)      | 14 (12, 16)       | 30 (19, 42)    | 193 (167, 221)  | 4 (3, 6)    | 227 (195, 263)   | 1.0 (0.6, 1.4) | 9.0 (7.8, 10.3)   | 0.7 (0.4, 1.0) | 4.5 (3.9, 5.2)    |
| Samoa                            | Women | Ages 20 to 44     | 0.0112  | 1.0 (0.3, 1.8) | 33 (31, 34) | 0 (0, 0)          | 1 (1, 1)         | 0 (0, 0)      | 1 (1, 1)          | 1 (1, 2)       | 43 (29, 56)     | 1 (0, 1)    | 45 (31, 58)      | 2.9 (1.7, 4.1) | 19.1 (13.1, 25.0) | 0.4 (0.2, 0.6) | 15.7 (10.9, 20.5) |
| Samoa                            | Women | Ages 45 to 64     | 0.0126  | 0.5 (0.1, 0.9) | 36 (34, 38) | 0 (0, 0)          | 4 (3, 5)         | 0 (0, 0)      | 4 (3, 6)          | 7 (4, 10)      | 331 (231, 430)  | 1 (1, 2)    | 340 (239, 439)   | 1.4 (0.8, 2.0) | 10.2 (7.1, 13.3)  | 0.5 (0.3, 0.7) | 12.7 (9.0, 16.5)  |
| Samoa                            | Women | Ages 65 and older | 0.0155  | 0.4 (0.1, 0.6) | 32 (29, 35) | 0 (0, 0)          | 4 (3, 6)         | 0 (0, 0)      | 5 (3, 6)          | 35 (20, 50)    | 834 (590, 1090) | 5 (3, 7)    | 874 (627, 1139)  | 0.6 (0.3, 0.8) | 5.2 (3.7, 6.7)    | 0.3 (0.2, 0.5) | 5.2 (3.7, 6.8)    |
| Samoa                            | Women | Overall           | 0.0393  | 0.6 (0.2, 1.1) | 33 (31, 36) | 0 (0, 0)          | 9 (8, 11)        | 0 (0, 0)      | 10 (8, 12)        | 8 (5, 11)      | 241 (195, 291)  | 1 (1, 2)    | 250 (204, 302)   | 0.8 (0.5, 1.1) | 7.3 (5.9, 8.8)    | 0.4 (0.2, 0.5) | 7.7 (6.3, 9.3)    |
| Samoa                            | Men   | Ages 20 to 44     | 0.0119  | 1.1 (0.3, 1.9) | 29 (28, 31) | 0 (0, 0)          | 1 (1, 2)         | 0 (0, 0)      | 2 (1, 2)          | 7 (4, 10)      | 59 (40, 79)     | 0 (0, 0)    | 66 (47, 86)      | 3.0 (1.8, 4.1) | 19.7 (13.4, 26.1) | 0.5 (0.3, 0.8) | 15.4 (10.9, 20.0) |
| Samoa                            | Men   | Ages 45 to 64     | 0.0131  | 0.5 (0.2, 0.9) | 32 (31, 34) | 0 (0, 0)          | 5 (4, 7)         | 0 (0, 0)      | 6 (4, 7)          | 27 (17, 38)    | 393 (274, 509)  | 1 (1, 2)    | 421 (301, 536)   | 1.4 (0.9, 2.0) | 10.9 (7.6, 14.1)  | 0.3 (0.1, 0.5) | 9.8 (7.0, 12.4)   |
| Samoa                            | Men   | Ages 65 and older | 0.0153  | 0.4 (0.1, 0.7) | 31 (28, 33) | 0 (0, 0)          | 4 (2, 5)         | 0 (0, 0)      | 4 (3, 5)          | 56 (32, 80)    | 895 (587, 1221) | 6 (4, 8)    | 959 (639, 1287)  | 0.6 (0.4, 0.9) | 6.0 (3.9, 8.1)    | 0.2 (0.1, 0.4) | 4.9 (3.3, 6.6)    |
| Samoa                            | Men   | Overall           | 0.0404  | 0.7 (0.2, 1.2) | 31 (29, 32) | 1 (0, 1)          | 10 (8, 12)       | 0 (0, 0)      | 11 (9, 13)        | 18 (11, 26)    | 251 (197, 301)  | 1 (1, 1)    | 270 (211, 323)   | 1.1 (0.7, 1.5) | 8.9 (7.0, 10.7)   | 0.3 (0.2, 0.4) | 7.6 (5.9, 9.1)    |
| Samoa                            | Both  | Overall           | 0.0796  | 0.7 (0.2, 1.1) | 32 (30, 34) | 1 (1, 1)          | 20 (17, 22)      | 0 (0, 0)      | 21 (18, 24)       | 13 (8, 18)     | 246 (208, 282)  | 1 (1, 2)    | 260 (221, 300)   | 0.7 (0.6, 1.4) | 8.6 (6.8, 9.2)    | 0.3 (0.2, 0.5) | 7.6 (6.5, 8.8)    |
| São Tomé and Príncipe            | Women | Ages 20 to 44     | 0.0139  | 1.2 (0.4, 2.0) | 24 (23, 25) | 0 (0, 0)          | 0 (0, 0)         | 0 (0, 0)      | 0 (0, 0)          | 2 (2, 3)       | 11 (8, 13)      | 0 (0, 0)    | 13 (10, 16)      | 2.4 (1.6, 3.4) | 23.3 (18.0, 28.5) | 0.6 (0.3, 0.8) | 7.9 (6.3, 9.5)    |
| São Tomé and Príncipe            | Women | Ages 45 to 64     | 0.00881 | 0.6 (0.2, 1.0) | 26 (25, 28) | 0 (0, 0)          | 0 (0, 1)         | 0 (0, 0)      | 0 (0, 1)          | 14 (8, 21)     | 45 (31, 58)     | 1 (1, 2)    | 60 (45, 76)      | 1.6 (0.9, 2.4) | 11.7 (8.0, 15.2)  | 0.6 (0.3, 0.8) | 4.2 (3.1, 5.4)    |
| São Tomé and Príncipe            | Women | Ages 65 and older | 0.0105  | 0.4 (0.1, 0.7) | 25 (22, 28) | 0 (0, 0)          | 1 (0, 1)         | 0 (0, 0)      | 1 (1, 1)          | 70 (44, 97)    | 150 (106, 193)  | 3 (2, 4)    | 223 (167, 276)   | 0.6 (0.4, 0.9) | 5.9 (4.2, 7.6)    | 0.5 (0.3, 0.7) | 1.5 (1.1, 1.9)    |
| São Tomé and Príncipe            | Women | Overall           | 0.0332  | 0.8 (0.2, 1.3) | 25 (23, 27) | 0 (0, 1)          | 1 (1, 1)         | 0 (0, 0)      | 2 (1, 2)          | 13 (8, 18)     | 35 (29, 41)     | 1 (1, 1)    | 48 (39, 58)      | 0.8 (0.5, 1.2) | 8.6 (7.0, 10.2)   | 0.5 (0.3, 0.8) | 2.3 (1.9, 2.8)    |
| São Tomé and Príncipe            | Men   | Ages 20 to 44     | 0.014   | 1.3 (0.3, 2.3) | 23 (22, 24) | 0 (0, 0)          | 0 (0, 0)         | 0 (0, 0)      | 0 (0, 0)          | 3 (1, 4)       | 11 (8, 13)      | 0 (0, 0)    | 14 (10, 17)      | 1.8 (0.9, 2.7) | 23.9 (18.0, 29.4) | 0.2 (0.1, 0.3) | 7.0 (5.3, 8.6)    |
| São Tomé and Príncipe            | Men   | Ages 45 to 64     | 0.00703 | 0.6 (0.2, 1.1) | 24 (23, 25) | 0 (0, 0)          | 0 (0, 1)         | 0 (0, 0)      | 0 (0, 1)          | 7 (3, 10)      | 55 (38, 72)     | 0 (0, 1)    | 62 (43, 81)      | 0.7 (0.4, 1.1) | 11.1 (7.6, 14.6)  | 0.2 (0.1, 0.4) | 4.4 (3.1, 5.8)    |
| São Tomé and Príncipe            | Men   | Ages 65 and older | 0.00957 | 0.5 (0.1, 0.8) | 23 (21, 25) | 0 (0, 0)          | 0 (0, 1)         | 0 (0, 0)      | 1 (0, 1)          | 25 (13, 39)    | 179 (121, 238)  | 2 (1, 3)    | 206 (146, 267)   | 0.3 (0.2, 0.5) | 5.9 (4.0, 7.9)    | 0.1 (0.1, 0.2) | 1.8 (1.3, 2.3)    |
| São Tomé and Príncipe            | Men   | Overall           | 0.0306  | 0.8 (0.2, 1.4) | 24 (22, 25) | 0 (0, 0)          | 1 (1, 1)         | 0 (0, 0)      | 1 (1, 2)          | 5 (3, 8)       | 36 (29, 43)     | 0 (0, 0)    | 42 (34, 50)      | 0.5 (0.3, 0.8) | 8.6 (7.0, 10.3)   | 0.2 (0.1, 0.3) | 2.8 (2.3, 3.4)    |
| São Tomé and Príncipe            | Both  | Overall           | 0.0638  | 0.8 (0.2, 1.4) | 24 (23, 26) |                   |                  |               |                   |                |                 |             |                  |                |                   |                |                   |

|        |       |                   |       |                |             |                |                |             |                |               |               |            |                |                |                  |                |                |
|--------|-------|-------------------|-------|----------------|-------------|----------------|----------------|-------------|----------------|---------------|---------------|------------|----------------|----------------|------------------|----------------|----------------|
| Serbia | Women | Ages 20 to 44     | 0.723 | 0.4 (0.3, 0.5) | 23 (22, 25) | 1 (1, 1)       | 3 (2, 4)       | 0 (0, 1)    | 5 (3, 6)       | 1 (0, 1)      | 2 (2, 3)      | 0 (0, 0)   | 3 (2, 4)       | 1.2 (0.8, 1.7) | 10.6 (7.1, 13.7) | 0.3 (0.2, 0.4) | 1.6 (1.2, 2.0) |
| Serbia | Women | Ages 45 to 64     | 1.28  | 0.2 (0.2, 0.3) | 28 (26, 30) | 11 (7, 15)     | 23 (16, 32)    | 3 (2, 5)    | 37 (27, 47)    | 9 (5, 12)     | 18 (12, 25)   | 2 (1, 4)   | 29 (21, 37)    | 0.8 (0.5, 1.2) | 6.4 (4.3, 8.7)   | 0.3 (0.2, 0.4) | 1.3 (0.9, 1.6) |
| Serbia | Women | Ages 65 and older | 1.48  | 0.2 (0.1, 0.2) | 29 (25, 32) | 71 (41, 104)   | 84 (63, 105)   | 6 (3, 8)    | 161 (117, 207) | 88 (51, 129)  | 104 (78, 130) | 7 (4, 10)  | 199 (145, 257) | 0.3 (0.2, 0.5) | 3.3 (2.5, 4.2)   | 0.2 (0.1, 0.3) | 0.6 (0.4, 0.7) |
| Serbia | Women | Overall           | 3.48  | 0.3 (0.2, 0.3) | 27 (24, 29) | 83 (48, 120)   | 110 (88, 134)  | 9 (5, 13)   | 203 (153, 258) | 24 (14, 34)   | 32 (25, 38)   | 3 (2, 4)   | 58 (44, 73)    | 0.4 (0.2, 0.5) | 3.8 (3.0, 4.6)   | 0.2 (0.2, 0.4) | 0.7 (0.5, 0.8) |
| Serbia | Men   | Ages 20 to 44     | 0.749 | 0.5 (0.4, 0.6) | 26 (24, 27) | 5 (3, 7)       | 8 (6, 11)      | 0 (0, 1)    | 13 (10, 17)    | 3 (2, 5)      | 6 (4, 8)      | 0 (0, 0)   | 9 (7, 12)      | 1.6 (0.9, 2.3) | 12.5 (8.7, 16.6) | 0.2 (0.1, 0.4) | 2.9 (2.1, 3.7) |
| Serbia | Men   | Ages 45 to 64     | 1.24  | 0.2 (0.2, 0.3) | 28 (26, 30) | 27 (17, 39)    | 40 (26, 53)    | 3 (2, 5)    | 70 (51, 91)    | 22 (13, 31)   | 32 (21, 43)   | 3 (2, 4)   | 57 (41, 73)    | 0.9 (0.5, 1.2) | 6.8 (4.5, 9.1)   | 0.2 (0.1, 0.3) | 1.5 (1.1, 2.0) |
| Serbia | Men   | Ages 65 and older | 1.29  | 0.2 (0.1, 0.2) | 27 (25, 29) | 72 (43, 105)   | 68 (49, 87)    | 6 (4, 8)    | 145 (106, 188) | 118 (71, 173) | 112 (81, 143) | 10 (6, 14) | 240 (175, 310) | 0.4 (0.2, 0.5) | 3.6 (2.6, 4.6)   | 0.1 (0.1, 0.2) | 0.6 (0.4, 0.8) |
| Serbia | Men   | Overall           | 3.28  | 0.3 (0.2, 0.4) | 27 (25, 28) | 104 (62, 149)  | 116 (93, 140)  | 10 (6, 14)  | 229 (174, 291) | 32 (19, 45)   | 35 (28, 43)   | 3 (2, 4)   | 70 (53, 89)    | 0.5 (0.3, 0.7) | 4.6 (3.7, 5.5)   | 0.2 (0.1, 0.2) | 0.8 (0.6, 1.0) |
| Serbia | Both  | Overall           | 6.76  | 0.3 (0.2, 0.4) | 27 (25, 29) | 187 (111, 267) | 226 (192, 261) | 19 (11, 27) | 432 (333, 536) | 28 (16, 39)   | 33 (28, 39)   | 3 (2, 4)   | 64 (49, 79)    | 0.4 (0.2, 0.6) | 4.1 (3.5, 4.8)   | 0.2 (0.1, 0.2) | 0.7 (0.6, 0.9) |

|            |       |                   |         |                |             |          |          |          |          |               |                |            |                |                |                   |                |                |
|------------|-------|-------------------|---------|----------------|-------------|----------|----------|----------|----------|---------------|----------------|------------|----------------|----------------|-------------------|----------------|----------------|
| Seychelles | Women | Ages 20 to 44     | 0.00611 | 0.6 (0.2, 1.1) | 26 (25, 28) | 0 (0, 0) | 0 (0, 0) | 0 (0, 0) | 0 (0, 0) | 5 (3, 8)      | 11 (8, 14)     | 1 (1, 1)   | 17 (12, 21)    | 2.1 (1.1, 3.3) | 15.0 (10.6, 19.4) | 0.4 (0.2, 0.6) | 3.0 (2.2, 3.9) |
| Seychelles | Women | Ages 45 to 64     | 0.00044 | 0.3 (0.1, 0.6) | 30 (29, 32) | 0 (0, 0) | 0 (0, 0) | 0 (0, 0) | 0 (0, 0) | 25 (14, 38)   | 60 (42, 78)    | 4 (2, 5)   | 89 (64, 113)   | 1.2 (0.7, 1.8) | 8.4 (5.9, 11.0)   | 0.3 (0.2, 0.5) | 2.3 (1.7, 3.0) |
| Seychelles | Women | Ages 65 and older | 0.00533 | 0.2 (0.1, 0.4) | 29 (26, 32) | 0 (0, 0) | 0 (0, 1) | 0 (0, 0) | 1 (0, 1) | 134 (79, 197) | 276 (194, 358) | 10 (6, 15) | 420 (312, 530) | 0.7 (0.4, 1.0) | 4.5 (3.2, 5.9)    | 0.3 (0.2, 0.4) | 1.4 (1.1, 1.8) |
| Seychelles | Women | Overall           | 0.0158  | 0.4 (0.1, 0.7) | 28 (26, 30) | 0 (0, 1) | 1 (1, 1) | 0 (0, 0) | 1 (1, 1) | 22 (13, 32)   | 48 (39, 58)    | 2 (1, 3)   | 73 (58, 89)    | 0.9 (0.5, 1.3) | 6.1 (4.9, 7.3)    | 0.3 (0.2, 0.5) | 1.8 (1.4, 2.2) |
| Seychelles | Men   | Ages 20 to 44     | 0.00611 | 0.7 (0.2, 1.1) | 25 (24, 26) | 0 (0, 0) | 0 (0, 0) | 0 (0, 0) | 1 (0, 1) | 15 (8, 22)    | 18 (13, 22)    | 1 (0, 1)   | 33 (24, 43)    | 2.1 (1.2, 3.2) | 15.7 (11.2, 20.0) | 0.4 (0.2, 0.5) | 3.5 (2.6, 4.6) |
| Seychelles | Men   | Ages 45 to 64     | 0.00398 | 0.4 (0.1, 0.6) | 27 (25, 28) | 0 (0, 0) | 0 (0, 0) | 0 (0, 0) | 1 (0, 1) | 76 (44, 114)  | 77 (52, 103)   | 6 (3, 9)   | 160 (116, 210) | 1.2 (0.7, 1.9) | 8.9 (6.1, 11.8)   | 0.4 (0.2, 0.7) | 1.9 (1.4, 2.5) |
| Seychelles | Men   | Ages 65 and older | 0.00506 | 0.3 (0.1, 0.4) | 25 (23, 27) | 0 (0, 0) | 0 (0, 0) | 0 (0, 0) | 1 (0, 1) | 154 (94, 216) | 196 (136, 259) | 15 (9, 21) | 365 (270, 463) | 0.6 (0.4, 0.9) | 5.0 (3.5, 6.6)    | 0.3 (0.1, 0.4) | 1.1 (0.8, 1.4) |
| Seychelles | Men   | Overall           | 0.0152  | 0.4 (0.1, 0.7) | 26 (24, 27) | 1 (0, 1) | 1 (1, 1) | 0 (0, 0) | 1 (1, 2) | 42 (26, 60)   | 47 (39, 56)    | 3 (2, 4)   | 92 (71, 116)   | 1.1 (0.7, 1.5) | 7.8 (6.4, 9.2)    | 0.3 (0.2, 0.5) | 1.7 (1.3, 2.2) |
| Seychelles | Both  | Overall           | 0.031   | 0.4 (0.1, 0.7) | 27 (25, 29) | 1 (1, 1) | 1 (1, 2) | 0 (0, 0) | 3 (2, 3) | 32 (20, 46)   | 48 (41, 55)    | 3 (2, 4)   | 83 (65, 101)   | 1.0 (0.6, 1.4) | 6.8 (5.8, 7.9)    | 0.3 (0.2, 0.5) | 1.8 (1.4, 2.2) |

|              |       |                   |       |                |             |           |             |          |             |             |                |          |                |                |                  |                |                |
|--------------|-------|-------------------|-------|----------------|-------------|-----------|-------------|----------|-------------|-------------|----------------|----------|----------------|----------------|------------------|----------------|----------------|
| Sierra Leone | Women | Ages 20 to 44     | 0.445 | 0.3 (0.1, 0.6) | 24 (23, 25) | 1 (0, 1)  | 10 (7, 13)  | 0 (0, 0) | 11 (8, 14)  | 1 (0, 2)    | 14 (10, 18)    | 0 (0, 0) | 15 (11, 19)    | 0.6 (0.3, 1.0) | 9.8 (7.0, 12.7)  | 0.1 (0.1, 0.2) | 4.7 (3.4, 6.0) |
| Sierra Leone | Women | Ages 45 to 64     | 0.336 | 0.2 (0.1, 0.3) | 25 (24, 26) | 2 (1, 2)  | 18 (12, 24) | 0 (0, 0) | 20 (13, 26) | 5 (2, 7)    | 54 (35, 72)    | 0 (0, 1) | 59 (39, 78)    | 0.4 (0.2, 0.6) | 5.8 (3.7, 7.7)   | 0.1 (0.1, 0.2) | 2.6 (1.7, 3.5) |
| Sierra Leone | Women | Ages 65 and older | 0.364 | 0.1 (0.0, 0.2) | 22 (19, 26) | 1 (1, 2)  | 11 (6, 15)  | 0 (0, 0) | 12 (7, 16)  | 19 (10, 28) | 196 (115, 275) | 1 (0, 2) | 215 (133, 296) | 0.2 (0.1, 0.4) | 3.8 (2.3, 5.4)   | 0.2 (0.1, 0.3) | 1.8 (1.1, 2.4) |
| Sierra Leone | Women | Overall           | 1.15  | 0.2 (0.1, 0.4) | 24 (22, 25) | 3 (2, 5)  | 39 (30, 47) | 0 (0, 0) | 43 (33, 51) | 3 (1, 4)    | 34 (26, 41)    | 0 (0, 0) | 37 (29, 45)    | 0.3 (0.2, 0.5) | 5.6 (4.3, 6.8)   | 0.1 (0.1, 0.2) | 2.6 (2.0, 3.1) |
| Sierra Leone | Men   | Ages 20 to 44     | 0.425 | 0.4 (0.1, 0.6) | 23 (22, 23) | 1 (0, 1)  | 8 (6, 11)   | 0 (0, 0) | 9 (7, 12)   | 1 (1, 2)    | 12 (8, 15)     | 0 (0, 0) | 13 (10, 17)    | 0.6 (0.3, 1.0) | 10.4 (7.5, 13.5) | 0.1 (0.1, 0.2) | 4.1 (3.1, 5.3) |
| Sierra Leone | Men   | Ages 45 to 64     | 0.298 | 0.2 (0.1, 0.3) | 23 (22, 24) | 2 (1, 3)  | 18 (12, 24) | 0 (0, 0) | 20 (14, 26) | 6 (3, 9)    | 61 (39, 81)    | 0 (0, 1) | 67 (46, 87)    | 0.4 (0.2, 0.5) | 5.9 (3.8, 7.8)   | 0.1 (0.1, 0.2) | 2.6 (1.8, 3.4) |
| Sierra Leone | Men   | Ages 65 and older | 0.341 | 0.1 (0.0, 0.2) | 22 (20, 23) | 1 (1, 2)  | 10 (6, 14)  | 0 (0, 0) | 11 (7, 15)  | 18 (9, 27)  | 179 (105, 247) | 1 (0, 1) | 198 (122, 268) | 0.2 (0.1, 0.3) | 3.8 (2.2, 5.3)   | 0.1 (0.1, 0.2) | 1.6 (1.0, 2.2) |
| Sierra Leone | Men   | Overall           | 1.06  | 0.2 (0.1, 0.4) | 22 (21, 23) | 4 (2, 6)  | 37 (28, 44) | 0 (0, 0) | 40 (32, 49) | 3 (2, 5)    | 34 (27, 42)    | 0 (0, 0) | 38 (30, 46)    | 0.3 (0.2, 0.5) | 5.6 (4.4, 6.8)   | 0.1 (0.1, 0.2) | 2.4 (1.9, 2.9) |
| Sierra Leone | Both  | Overall           | 2.21  | 0.2 (0.1, 0.4) | 23 (22, 24) | 7 (4, 10) | 76 (63, 86) | 0 (0, 1) | 83 (69, 95) | 3 (2, 5)    | 34 (29, 39)    | 0 (0, 0) | 38 (31, 43)    | 0.3 (0.2, 0.5) | 4.6 (4.7, 6.4)   | 0.1 (0.1, 0.2) | 2.5 (2.1, 2.8) |

|           |       |                   |       |                |             |            |             |          |             |             |             |          |              |                |                  |                |                |
|-----------|-------|-------------------|-------|----------------|-------------|------------|-------------|----------|-------------|-------------|-------------|----------|--------------|----------------|------------------|----------------|----------------|
| Singapore | Women | Ages 20 to 44     | 0.303 | 0.4 (0.3, 0.5) | 22 (21, 23) | 0 (0, 0)   | 1 (1, 1)    | 0 (0, 0) | 1 (1, 2)    | 0 (0, 0)    | 2 (1, 2)    | 0 (0, 0) | 2 (1, 2)     | 0.6 (0.3, 1.0) | 9.8 (6.1, 13.3)  | 0.1 (0.1, 0.2) | 1.4 (0.9, 1.9) |
| Singapore | Women | Ages 45 to 64     | 0.48  | 0.2 (0.1, 0.2) | 24 (23, 25) | 1 (0, 1)   | 5 (4, 7)    | 0 (0, 0) | 7 (5, 8)    | 2 (1, 3)    | 11 (7, 15)  | 1 (0, 1) | 14 (10, 18)  | 0.4 (0.2, 0.6) | 5.9 (3.9, 7.9)   | 0.1 (0.0, 0.1) | 1.1 (0.8, 1.4) |
| Singapore | Women | Ages 65 and older | 0.486 | 0.1 (0.1, 0.2) | 24 (22, 25) | 3 (1, 4)   | 9 (7, 12)   | 0 (0, 1) | 12 (9, 16)  | 17 (8, 27)  | 62 (43, 82) | 2 (1, 4) | 82 (58, 105) | 0.2 (0.1, 0.3) | 3.0 (2.1, 3.9)   | 0.1 (0.0, 0.1) | 0.5 (0.4, 0.7) |
| Singapore | Women | Overall           | 1.27  | 0.3 (0.2, 0.3) | 23 (22, 24) | 3 (2, 5)   | 16 (12, 20) | 1 (0, 1) | 20 (16, 25) | 3 (1, 4)    | 13 (10, 15) | 1 (0, 1) | 16 (12, 19)  | 0.2 (0.1, 0.3) | 3.8 (2.9, 4.7)   | 0.1 (0.0, 0.1) | 0.7 (0.5, 0.8) |
| Singapore | Men   | Ages 20 to 44     | 0.276 | 0.5 (0.4, 0.6) | 23 (23, 24) | 1 (0, 1)   | 2 (1, 2)    | 0 (0, 0) | 2 (2, 3)    | 1 (0, 2)    | 3 (2, 4)    | 0 (0, 0) | 4 (3, 5)     | 0.7 (0.3, 1.1) | 11.1 (7.3, 14.8) | 0.1 (0.0, 0.1) | 1.9 (1.3, 2.5) |
| Singapore | Men   | Ages 45 to 64     | 0.483 | 0.2 (0.2, 0.3) | 24 (24, 25) | 3 (1, 4)   | 9 (6, 12)   | 0 (0, 0) | 12 (9, 15)  | 5 (3, 8)    | 18 (12, 24) | 1 (0, 1) | 24 (18, 32)  | 0.4 (0.2, 0.6) | 6.5 (4.3, 8.6)   | 0.1 (0.1, 0.2) | 1.2 (0.9, 1.6) |
| Singapore | Men   | Ages 65 and older | 0.458 | 0.2 (0.1, 0.2) | 23 (22, 24) | 3 (2, 5)   | 8 (5, 11)   | 1 (0, 1) | 12 (8, 15)  | 24 (12, 36) | 61 (42, 81) | 4 (2, 6) | 89 (63, 115) | 0.2 (0.1, 0.3) | 3.3 (2.2, 4.4)   | 0.1 (0.0, 0.1) | 0.5 (0.4, 0.6) |
| Singapore | Men   | Overall           | 1.22  | 0.3 (0.2, 0.4) | 24 (23, 24) | 6 (3, 9)   | 19 (15, 22) | 1 (0, 1) | 26 (20, 32) | 5 (3, 8)    | 15 (12, 18) | 1 (0, 1) | 21 (17, 26)  | 0.3 (0.1, 0.4) | 4.7 (3.8, 5.7)   | 0.1 (0.1, 0.2) | 0.8 (0.6, 0.9) |
| Singapore | Both  | Overall           | 2.49  | 0.3 (0.2, 0.3) | 23 (22, 24) | 10 (5, 15) | 35 (29, 40) | 2 (1, 2) | 46 (37, 54) | 4 (2, 6)    | 14 (12, 16) | 1 (0, 1) | 18 (15, 22)  | 0.2 (0.1, 0.3) | 4.3 (3.6, 4.9)   | 0.1 (0.0, 0.1) | 0.7 (0.6, 0.8) |

|          |       |                   |       |                |             |               |             |             |                |                |             |             |                |                |                   |                |                |
|----------|-------|-------------------|-------|----------------|-------------|---------------|-------------|-------------|----------------|----------------|-------------|-------------|----------------|----------------|-------------------|----------------|----------------|
| Slovakia | Women | Ages 20 to 44     | 0.452 | 0.7 (0.5, 0.8) | 25 (21, 29) | 1 (0, 1)      | 1 (1, 2)    | 0 (0, 0)    | 2 (2, 3)       | 1 (1, 1)       | 1 (1, 2)    | 0 (0, 1)    | 3 (2, 4)       | 1.9 (1.1, 2.8) | 15.0 (10.6, 19.4) | 0.4 (0.3, 0.7) | 1.8 (1.4, 2.4) |
| Slovakia | Women | Ages 45 to 64     | 0.749 | 0.3 (0.2, 0.4) | 28 (24, 32) | 8 (5, 11)     | 9 (6, 12)   | 2 (1, 4)    | 20 (14, 25)    | 11 (6, 15)     | 12 (8, 16)  | 3 (2, 5)    | 26 (18, 34)    | 1.0 (0.6, 1.5) | 7.9 (5.2, 10.6)   | 0.3 (0.2, 0.5) | 1.1 (0.8, 1.5) |
| Slovakia | Women | Ages 65 and older | 0.806 | 0.2 (0.2, 0.3) | 26 (21, 32) | 50 (28, 76)   | 26 (19, 33) | 6 (3, 8)    | 82 (55, 111)   | 119 (66, 180)  | 62 (45, 78) | 13 (8, 20)  | 195 (132, 264) | 0.4 (0.2, 0.6) | 3.7 (2.7, 4.7)    | 0.3 (0.2, 0.5) | 0.5 (0.3, 0.7) |
| Slovakia | Women | Overall           | 2.01  | 0.4 (0.3, 0.5) | 26 (22, 31) | 59 (34, 88)   | 36 (28, 45) | 8 (5, 12)   | 104 (73, 138)  | 29 (17, 44)    | 18 (14, 22) | 4 (2, 6)    | 52 (36, 69)    | 0.4 (0.2, 0.6) | 4.4 (3.4, 5.4)    | 0.3 (0.2, 0.5) | 0.6 (0.4, 0.7) |
| Slovakia | Men   | Ages 20 to 44     | 0.472 | 0.8 (0.6, 1.0) | 26 (24, 29) | 4 (2, 5)      | 4 (3, 6)    | 0 (0, 1)    | 9 (6, 11)      | 4 (3, 6)       | 5 (3, 7)    | 0 (0, 1)    | 10 (7, 13)     | 2.1 (1.3, 3.0) | 16.2 (11.0, 21.3) | 0.4 (0.2, 0.7) | 3.2 (2.3, 4.0) |
| Slovakia | Men   | Ages 45 to 64     | 0.699 | 0.4 (0.3, 0.5) | 28 (25, 31) | 27 (16, 38)   | 17 (12, 22) | 4 (2, 6)    | 48 (34, 63)    | 39 (23, 55)    | 24 (17, 32) | 6 (4, 8)    | 69 (49, 90)    | 1.1 (0.7, 1.5) | 8.6 (5.8, 11.3)   | 0.3 (0.2, 0.5) | 1.3 (0.9, 1.7) |
| Slovakia | Men   | Ages 65 and older | 0.646 | 0.3 (0.2, 0.3) | 27 (24, 30) | 42 (25, 63)   | 19 (14, 24) | 5 (3, 7)    | 66 (46, 90)    | 169 (100, 254) | 76 (54, 98) | 19 (11, 27) | 264 (183, 361) | 0.5 (0.3, 0.7) | 4.4 (3.2, 5.7)    | 0.2 (0.1, 0.2) | 0.6 (0.4, 0.8) |
| Slovakia | Men   | Overall           | 1.82  | 0.5 (0.4, 0.6) | 27 (24, 30) | 73 (43, 107)  | 40 (33, 49) | 9 (6, 13)   | 123 (89, 163)  | 40 (24, 59)    | 22 (18, 27) | 5 (3, 7)    | 68 (49, 90)    | 0.6 (0.4, 0.9) | 6.2 (5.0, 7.5)    | 0.2 (0.1, 0.3) | 0.8 (0.6, 1.1) |
| Slovakia | Both  | Overall           | 3.82  | 0.5 (0.4, 0.6) | 27 (23, 30) | 132 (79, 190) | 77 (66, 89) | 18 (11, 25) | 227 (164, 297) | 35 (21, 50)    | 20 (17, 23) | 5 (3, 7)    | 59 (43, 78)    | 0.5 (0.3, 0.7) | 5.2 (4.4, 6.0)    | 0.3 (0.2, 0.4) | 0.7 (0.5, 0.9) |

|          |       |                   |       |                |             |            |             |          |             |             |             |            |               |                |                  |                |                |
|----------|-------|-------------------|-------|----------------|-------------|------------|-------------|----------|-------------|-------------|-------------|------------|---------------|----------------|------------------|----------------|----------------|
| Slovenia | Women | Ages 20 to 44     | 0.144 | 0.5 (0.4, 0.6) | 25 (22, 29) | 0 (0, 0)   | 0 (0, 0)    | 0 (0, 0) | 0 (0, 0)    | 0 (0, 0)    | 1 (0, 1)    | 0 (0, 0)   | 1 (1, 1)      | 1.6 (0.9, 2.5) | 12.3 (8.6, 16.1) | 0.3 (0.2, 0.5) | 1.1 (0.8, 1.5) |
| Slovenia | Women | Ages 45 to 64     | 0.286 | 0.2 (0.2, 0.3) | 28 (24, 32) | 1 (0, 1)   | 2 (1, 2)    | 1 (0, 1) | 3 (2, 4)    | 3 (2, 4)    | 6 (4, 8)    | 2 (1, 3)   | 11 (8, 14)    | 0.9 (0.6, 1.3) | 7.0 (4.6, 9.2)   | 0.3 (0.2, 0.4) | 0.9 (0.6, 1.1) |
| Slovenia | Women | Ages 65 and older | 0.351 | 0.2 (0.1, 0.2) | 27 (21, 32) | 12 (6, 18) | 11 (8, 14)  | 2 (1, 3) | 25 (18, 33) | 57 (31, 87) | 53 (39, 66) | 11 (7, 17) | 121 (86, 159) | 0.3 (0.2, 0.5) | 2.9 (2.1, 3.6)   | 0.3 (0.1, 0.4) | 0.5 (0.3, 0.6) |
| Slovenia | Women | Overall           | 0.781 | 0.3 (0.2, 0.4) | 27 (22, 31) | 13 (7, 19) | 13 (10, 16) | 3 (2, 4) | 28 (21, 37) | 16 (9, 24)  | 16 (13, 20) | 4 (2, 6)   | 36 (26, 47)   | 0.3 (0.2, 0.5) | 3.2 (2.5, 3.9)   | 0.3 (0.2, 0.4) | 0.5 (0.4, 0.7) |
| Slovenia | Men   | Ages 20 to 44     | 0.16  | 0.6 (0.4, 0.7) | 27 (24, 29) | 0 (0, 1)   | 0 (0, 1)    | 0 (0, 0) | 1 (1, 1)    | 1 (1, 2)    | 1 (1, 2)    | 0 (0, 0)   | 3 (2, 4)      | 1.7 (1.0, 2.4) | 13.6 (9.1, 17.7) | 0.3 (0.2, 0.5) | 2.0 (1.4, 2.6) |
| Slovenia | Men   | Ages 45 to 64     | 0.293 | 0.3 (0.2, 0.3) | 29 (26, 31) | 4 (2, 5)   | 4 (3, 5)    | 1 (0, 1) | 9 (6, 11)</ |             |             |            |               |                |                  |                |                |

|              |       |                   |        |                |             |                |                   |              |                   |               |                 |             |                  |                |                   |                |                   |
|--------------|-------|-------------------|--------|----------------|-------------|----------------|-------------------|--------------|-------------------|---------------|-----------------|-------------|------------------|----------------|-------------------|----------------|-------------------|
| Somalia      | Both  | Overall           | 3.41   | 0.2 (0.1, 0.4) | 22 (19, 26) | 12 (6, 18)     | 117 (99, 135)     | 2 (1, 3)     | 131 (110, 152)    | 3 (2, 5)      | 34 (29, 40)     | 1 (0, 1)    | 38 (32, 44)      | 0.3 (0.1, 0.4) | 4.8 (4.0, 5.5)    | 0.2 (0.1, 0.3) | 1.8 (1.5, 2.1)    |
| South Africa | Women | Ages 20 to 44     | 4.16   | 0.9 (0.3, 1.6) | 28 (27, 29) | 37 (20, 60)    | 342 (250, 424)    | 6 (3, 9)     | 384 (290, 471)    | 5 (3, 8)      | 48 (35, 59)     | 1 (0, 1)    | 54 (41, 66)      | 3.3 (1.7, 5.3) | 19.6 (14.4, 24.4) | 0.9 (0.3, 1.3) | 12.9 (9.8, 15.9)  |
| South Africa | Women | Ages 45 to 64     | 4.21   | 0.5 (0.1, 0.8) | 32 (31, 33) | 61 (33, 94)    | 720 (495, 960)    | 12 (7, 18)   | 793 (563, 1037)   | 14 (8, 22)    | 171 (118, 228)  | 3 (2, 4)    | 188 (134, 246)   | 1.5 (0.8, 2.4) | 9.7 (6.6, 12.9)   | 0.6 (0.4, 0.9) | 7.4 (5.3, 9.7)    |
| South Africa | Women | Ages 65 and older | 4.41   | 0.3 (0.1, 0.6) | 29 (28, 30) | 113 (67, 165)  | 820 (556, 1083)   | 15 (9, 22)   | 948 (672, 1223)   | 79 (47, 115)  | 432 (388, 757)  | 11 (6, 16)  | 662 (469, 855)   | 0.7 (0.4, 1.1) | 5.2 (3.6, 6.9)    | 0.5 (0.3, 0.8) | 3.3 (2.3, 4.2)    |
| South Africa | Women | Overall           | 12.8   | 0.6 (0.2, 1.0) | 29 (29, 30) | 211 (126, 304) | 1882 (1516, 2251) | 34 (20, 47)  | 2126 (1735, 2528) | 16 (10, 24)   | 147 (119, 176)  | 3 (2, 4)    | 166 (136, 198)   | 1.0 (0.6, 1.5) | 7.6 (6.1, 9.1)    | 0.6 (0.4, 0.9) | 5.0 (4.1, 5.9)    |
| South Africa | Men   | Ages 20 to 44     | 4.5    | 3.6 (2.1, 5.6) | 26 (25, 27) | 36 (21, 56)    | 302 (217, 385)    | 4 (3, 6)     | 342 (252, 429)    | 5 (3, 7)      | 40 (28, 50)     | 1 (0, 1)    | 45 (33, 56)      | 2.9 (1.7, 4.5) | 19.9 (14.3, 25.3) | 1.0 (0.6, 1.5) | 13.3 (9.8, 16.7)  |
| South Africa | Men   | Ages 45 to 64     | 3.64   | 1.0 (0.1, 0.8) | 29 (28, 30) | 92 (56, 138)   | 726 (509, 952)    | 21 (12, 32)  | 840 (609, 1070)   | 25 (15, 38)   | 199 (140, 261)  | 6 (3, 9)    | 230 (167, 294)   | 1.5 (0.9, 2.2) | 10.2 (7.2, 13.4)  | 1.0 (0.6, 1.5) | 6.4 (4.7, 8.2)    |
| South Africa | Men   | Ages 65 and older | 4.03   | 0.4 (0.1, 0.6) | 28 (27, 28) | 73 (44, 105)   | 431 (299, 572)    | 15 (9, 21)   | 519 (380, 663)    | 82 (49, 117)  | 483 (336, 641)  | 16 (10, 23) | 581 (426, 742)   | 1.8 (0.5, 1.1) | 5.8 (4.0, 7.7)    | 0.7 (0.4, 1.0) | 3.2 (2.4, 4.1)    |
| South Africa | Men   | Overall           | 12.2   | 0.6 (0.2, 1.1) | 27 (26, 28) | 201 (123, 288) | 1460 (1183, 1740) | 40 (24, 58)  | 1701 (1391, 2029) | 16 (10, 24)   | 120 (97, 143)   | 3 (2, 5)    | 140 (114, 167)   | 1.2 (0.7, 1.7) | 9.1 (7.4, 10.8)   | 0.9 (0.5, 1.2) | 5.4 (4.4, 6.4)    |
| South Africa | Both  | Overall           | 25     | 0.6 (0.2, 1.1) | 28 (28, 29) | 412 (251, 587) | 3341 (2870, 3799) | 74 (45, 104) | 3827 (3277, 4405) | 16 (10, 24)   | 134 (115, 152)  | 3 (2, 4)    | 153 (131, 176)   | 1.1 (0.7, 1.6) | 8.2 (7.0, 9.3)    | 0.7 (0.4, 1.0) | 5.1 (4.4, 5.9)    |
| Spain        | Women | Ages 20 to 44     | 3.31   | 0.4 (0.3, 0.4) | 24 (23, 25) | 2 (2, 3)       | 4 (3, 6)          | 2 (1, 2)     | 8 (6, 10)         | 0 (0, 0)      | 1 (0, 1)        | 0 (0, 0)    | 1 (1, 1)         | 1.1 (0.7, 1.5) | 10.0 (6.4, 13.2)  | 0.2 (0.1, 0.3) | 0.8 (0.6, 1.0)    |
| Spain        | Women | Ages 45 to 64     | 5.75   | 0.2 (0.1, 0.2) | 29 (28, 30) | 10 (6, 14)     | 24 (16, 33)       | 9 (5, 13)    | 43 (31, 56)       | 2 (1, 2)      | 4 (3, 6)        | 2 (1, 2)    | 7 (5, 10)        | 0.8 (0.5, 1.1) | 5.9 (3.8, 8.0)    | 0.2 (0.1, 0.3) | 0.7 (0.5, 0.9)    |
| Spain        | Women | Ages 65 and older | 8.12   | 0.1 (0.1, 0.1) | 29 (28, 30) | 134 (69, 210)  | 290 (203, 376)    | 35 (20, 51)  | 459 (341, 591)    | 30 (15, 47)   | 65 (45, 84)     | 8 (4, 11)   | 102 (76, 132)    | 0.2 (0.1, 0.4) | 2.2 (1.6, 2.9)    | 0.2 (0.1, 0.3) | 0.6 (0.4, 0.7)    |
| Spain        | Women | Overall           | 17.2   | 0.2 (0.2, 0.3) | 27 (26, 28) | 147 (79, 226)  | 319 (233, 403)    | 45 (27, 65)  | 511 (386, 652)    | 9 (5, 13)     | 19 (14, 23)     | 3 (2, 4)    | 30 (22, 38)      | 0.3 (0.1, 0.4) | 2.4 (1.7, 3.0)    | 0.2 (0.1, 0.3) | 0.6 (0.4, 0.7)    |
| Spain        | Men   | Ages 20 to 44     | 3.51   | 0.4 (0.3, 0.5) | 26 (26, 27) | 12 (7, 17)     | 11 (7, 14)        | 1 (1, 2)     | 24 (17, 31)       | 2 (1, 2)      | 1 (1, 2)        | 0 (0, 0)    | 3 (2, 4)         | 1.3 (0.8, 1.9) | 10.8 (6.9, 14.4)  | 0.3 (0.2, 0.4) | 1.7 (1.2, 2.2)    |
| Spain        | Men   | Ages 45 to 64     | 5.6    | 0.2 (0.1, 0.2) | 29 (28, 30) | 41 (25, 58)    | 54 (36, 73)       | 13 (8, 20)   | 109 (78, 139)     | 7 (4, 10)     | 10 (6, 13)      | 2 (1, 3)    | 19 (14, 25)      | 0.8 (0.5, 1.1) | 6.1 (4.0, 8.1)    | 0.2 (0.1, 0.4) | 1.1 (0.8, 1.3)    |
| Spain        | Men   | Ages 65 and older | 7.14   | 0.1 (0.1, 0.2) | 28 (28, 29) | 116 (66, 170)  | 209 (158, 262)    | 37 (23, 53)  | 362 (266, 449)    | 35 (20, 51)   | 63 (48, 79)     | 11 (7, 16)  | 110 (80, 136)    | 0.3 (0.2, 0.4) | 2.6 (2.0, 3.3)    | 0.1 (0.1, 0.2) | 0.6 (0.4, 0.7)    |
| Spain        | Men   | Overall           | 16.2   | 0.2 (0.2, 0.3) | 28 (27, 29) | 168 (101, 241) | 274 (217, 331)    | 52 (32, 74)  | 495 (370, 608)    | 10 (6, 15)    | 17 (13, 20)     | 3 (2, 5)    | 30 (23, 37)      | 0.4 (0.2, 0.5) | 3.1 (2.4, 3.7)    | 0.2 (0.1, 0.2) | 0.7 (0.5, 0.8)    |
| Spain        | Both  | Overall           | 33.4   | 0.2 (0.2, 0.3) | 27 (27, 28) | 315 (188, 450) | 593 (494, 696)    | 98 (60, 140) | 1006 (779, 1226)  | 9 (6, 13)     | 18 (15, 21)     | 3 (2, 4)    | 30 (23, 37)      | 0.3 (0.2, 0.4) | 2.6 (2.2, 3.1)    | 0.2 (0.1, 0.3) | 0.6 (0.5, 0.8)    |
| Sri Lanka    | Women | Ages 20 to 44     | 1.69   | 0.9 (0.7, 1.1) | 23 (22, 24) | 3 (2, 5)       | 20 (14, 25)       | 0 (0, 1)     | 23 (17, 29)       | 1 (0, 2)      | 6 (4, 8)        | 0 (0, 0)    | 7 (5, 9)         | 1.1 (0.6, 1.8) | 17.0 (11.9, 21.9) | 0.3 (0.2, 0.5) | 4.6 (3.3, 5.8)    |
| Sri Lanka    | Women | Ages 45 to 64     | 2.31   | 0.5 (0.4, 0.6) | 24 (23, 25) | 11 (6, 16)     | 100 (67, 136)     | 2 (1, 2)     | 113 (77, 147)     | 5 (2, 7)      | 43 (29, 59)     | 1 (0, 1)    | 49 (33, 64)      | 0.6 (0.3, 0.9) | 8.9 (6.0, 12.1)   | 0.3 (0.1, 0.5) | 3.4 (2.3, 4.4)    |
| Sri Lanka    | Women | Ages 65 and older | 2.39   | 0.3 (0.3, 0.4) | 22 (19, 25) | 29 (15, 45)    | 268 (190, 341)    | 2 (1, 3)     | 299 (218, 377)    | 31 (16, 49)   | 289 (205, 367)  | 2 (1, 3)    | 321 (235, 408)   | 0.2 (0.1, 0.4) | 3.9 (2.8, 4.9)    | 0.2 (0.1, 0.4) | 1.6 (1.2, 2.1)    |
| Sri Lanka    | Women | Overall           | 6.4    | 0.6 (0.4, 0.7) | 23 (21, 25) | 42 (22, 65)    | 388 (308, 470)    | 4 (2, 6)     | 434 (346, 525)    | 7 (3, 10)     | 61 (48, 73)     | 1 (0, 1)    | 68 (54, 82)      | 0.3 (0.2, 0.4) | 4.4 (3.8, 5.8)    | 0.3 (0.1, 0.4) | 2.0 (1.6, 2.4)    |
| Sri Lanka    | Men   | Ages 20 to 44     | 1.68   | 0.9 (0.7, 1.2) | 22 (21, 23) | 10 (5, 16)     | 45 (28, 59)       | 0 (0, 0)     | 55 (38, 71)       | 3 (2, 5)      | 14 (9, 19)      | 0 (0, 0)    | 18 (12, 23)      | 1.1 (0.6, 1.7) | 17.0 (10.7, 22.6) | 0.4 (0.2, 0.7) | 4.6 (3.2, 5.9)    |
| Sri Lanka    | Men   | Ages 45 to 64     | 2.14   | 0.5 (0.4, 0.6) | 22 (21, 23) | 36 (18, 55)    | 212 (142, 284)    | 1 (1, 2)     | 250 (179, 327)    | 17 (9, 26)    | 99 (66, 133)    | 1 (0, 1)    | 117 (84, 153)    | 0.6 (0.3, 0.9) | 9.3 (6.2, 12.5)   | 0.4 (0.2, 0.7) | 3.0 (2.1, 3.9)    |
| Sri Lanka    | Men   | Ages 65 and older | 2.18   | 0.4 (0.3, 0.4) | 21 (19, 23) | 32 (16, 48)    | 255 (167, 341)    | 1 (1, 2)     | 288 (196, 378)    | 41 (21, 62)   | 330 (216, 440)  | 2 (1, 3)    | 373 (253, 489)   | 0.2 (0.1, 0.3) | 2.9 (1.9, 3.9)    | 0.3 (0.1, 0.4) | 1.2 (0.8, 1.6)    |
| Sri Lanka    | Men   | Overall           | 6      | 0.6 (0.5, 0.8) | 22 (21, 23) | 78 (40, 120)   | 512 (394, 629)    | 3 (1, 5)     | 593 (462, 725)    | 13 (7, 20)    | 85 (66, 105)    | 0 (0, 1)    | 99 (77, 121)     | 0.3 (0.2, 0.5) | 4.6 (3.5, 5.6)    | 0.3 (0.2, 0.5) | 1.8 (1.4, 2.2)    |
| Sri Lanka    | Both  | Overall           | 12.4   | 0.6 (0.4, 0.7) | 22 (21, 24) | 121 (62, 184)  | 900 (755, 1046)   | 7 (3, 10)    | 1027 (851, 1192)  | 10 (5, 15)    | 73 (61, 84)     | 1 (0, 1)    | 83 (69, 96)      | 0.3 (0.2, 0.5) | 4.6 (3.9, 5.4)    | 0.3 (0.1, 0.4) | 1.8 (1.5, 2.1)    |
| Sudan        | Women | Ages 20 to 44     | 3.19   | 0.7 (0.2, 1.3) | 23 (19, 26) | 2 (1, 3)       | 18 (14, 23)       | 1 (0, 1)     | 21 (15, 26)       | 0 (0, 0)      | 3 (3, 4)        | 0 (0, 0)    | 4 (3, 5)         | 1.1 (0.5, 1.8) | 15.2 (11.2, 19.3) | 0.2 (0.1, 0.4) | 4.1 (3.1, 5.1)    |
| Sudan        | Women | Ages 45 to 64     | 2.54   | 0.4 (0.1, 0.6) | 24 (20, 28) | 7 (3, 11)      | 71 (46, 96)       | 2 (1, 4)     | 80 (55, 107)      | 3 (1, 4)      | 28 (18, 38)     | 1 (0, 1)    | 32 (22, 42)      | 0.5 (0.3, 0.8) | 7.7 (5.0, 10.4)   | 0.2 (0.1, 0.3) | 2.6 (1.7, 3.4)    |
| Sudan        | Women | Ages 65 and older | 3.09   | 0.3 (0.1, 0.4) | 23 (18, 28) | 14 (7, 22)     | 108 (71, 146)     | 2 (1, 3)     | 124 (86, 164)     | 17 (9, 27)    | 130 (86, 175)   | 2 (1, 4)    | 149 (103, 197)   | 0.3 (0.1, 0.4) | 4.3 (2.8, 5.8)    | 0.2 (0.1, 0.3) | 1.5 (1.0, 1.9)    |
| Sudan        | Women | Overall           | 8.83   | 0.5 (0.1, 0.8) | 23 (19, 28) | 23 (12, 35)    | 198 (151, 242)    | 5 (3, 8)     | 225 (177, 275)    | 3 (1, 4)      | 22 (17, 27)     | 1 (0, 1)    | 26 (20, 31)      | 0.3 (0.2, 0.5) | 5.5 (4.2, 6.7)    | 0.2 (0.1, 0.3) | 1.9 (1.5, 2.3)    |
| Sudan        | Men   | Ages 20 to 44     | 3.25   | 0.8 (0.2, 1.4) | 22 (20, 25) | 4 (2, 6)       | 64 (46, 82)       | 1 (0, 1)     | 69 (50, 87)       | 1 (0, 1)      | 12 (8, 15)      | 0 (0, 0)    | 12 (9, 16)       | 1.1 (0.6, 1.7) | 16.5 (11.8, 21.0) | 0.5 (0.3, 0.8) | 9.6 (7.0, 12.1)   |
| Sudan        | Men   | Ages 45 to 64     | 2.46   | 0.4 (0.1, 0.7) | 23 (20, 26) | 8 (4, 12)      | 114 (74, 154)     | 3 (2, 5)     | 126 (84, 166)     | 3 (2, 5)      | 47 (30, 63)     | 1 (0, 2)    | 51 (34, 67)      | 0.5 (0.3, 0.8) | 8.2 (5.3, 11.0)   | 0.4 (0.2, 0.7) | 3.7 (2.5, 4.9)    |
| Sudan        | Men   | Ages 65 and older | 2.99   | 0.3 (0.1, 0.5) | 22 (19, 25) | 11 (6, 17)     | 120 (81, 163)     | 3 (1, 4)     | 133 (94, 177)     | 15 (8, 23)    | 166 (113, 226)  | 4 (2, 6)    | 185 (131, 246)   | 0.2 (0.1, 0.4) | 4.6 (3.1, 6.3)    | 0.3 (0.2, 0.6) | 1.9 (1.3, 2.5)    |
| Sudan        | Men   | Overall           | 8.7    | 0.5 (0.2, 0.9) | 22 (20, 25) | 23 (12, 35)    | 298 (237, 361)    | 7 (3, 10)    | 328 (261, 393)    | 3 (1, 4)      | 34 (27, 41)     | 1 (0, 1)    | 38 (30, 45)      | 0.4 (0.2, 0.5) | 6.8 (4.4, 8.2)    | 0.3 (0.2, 0.6) | 2.9 (2.3, 3.5)    |
| Sudan        | Both  | Overall           | 17.5   | 0.5 (0.2, 0.8) | 23 (19, 26) | 46 (24, 69)    | 496 (416, 573)    | 11 (6, 17)   | 553 (464, 642)    | 3 (1, 4)      | 28 (24, 33)     | 1 (0, 1)    | 32 (26, 37)      | 0.3 (0.2, 0.5) | 6.2 (5.2, 7.2)    | 0.3 (0.2, 0.4) | 2.4 (2.0, 2.7)    |
| Suriname     | Women | Ages 20 to 44     | 0.0395 | 1.4 (0.4, 2.3) | 27 (23, 30) | 0 (0, 0)       | 2 (1, 2)          | 0 (0, 0)     | 2 (1, 2)          | 3 (2, 4)      | 21 (15, 27)     | 1 (1, 1)    | 25 (19, 32)      | 3.5 (2.1, 5.1) | 23.7 (16.8, 30.1) | 1.1 (0.6, 1.7) | 10.1 (7.5, 12.8)  |
| Suriname     | Women | Ages 45 to 64     | 0.0484 | 0.7 (0.2, 1.1) | 30 (26, 33) | 1 (1, 1)       | 5 (4, 7)          | 0 (0, 0)     | 6 (5, 8)          | 18 (11, 26)   | 105 (74, 138)   | 3 (2, 4)    | 126 (93, 162)    | 1.8 (1.1, 2.6) | 12.5 (8.8, 16.5)  | 0.6 (0.4, 1.0) | 6.0 (4.4, 7.7)    |
| Suriname     | Women | Ages 65 and older | 0.0558 | 0.5 (0.2, 0.8) | 28 (23, 33) | 2 (1, 3)       | 7 (5, 9)          | 0 (0, 0)     | 10 (7, 12)        | 107 (64, 154) | 379 (282, 480)  | 14 (8, 21)  | 500 (386, 628)   | 0.7 (0.4, 1.0) | 5.6 (4.2, 7.1)    | 0.5 (0.3, 0.8) | 2.1 (1.7, 2.7)    |
| Suriname     | Women | Overall           | 0.144  | 0.9 (0.3, 1.4) | 28 (24, 32) | 3 (2, 4)       | 14 (11, 17)       | 0 (0, 1)     | 18 (14, 21)       | 22 (13, 31)   | 98 (79, 117)    | 3 (2, 5)    | 123 (100, 147)   | 0.9 (0.5, 1.3) | 7.9 (6.4, 9.5)    | 0.6 (0.4, 0.9) | 3.1 (2.5, 3.7)    |
| Suriname     | Men   | Ages 20 to 44     | 0.0411 | 1.5 (0.4, 2.5) | 25 (22, 28) | 0 (0, 1)       | 2 (2, 3)          | 0 (0, 0)     | 3 (2, 3)          | 6 (4, 8)      | 27 (19, 33)     | 0 (0, 1)    | 33 (25, 41)      | 3.5 (2.1, 5.1) | 25.3 (18.2, 31.8) | 0.6 (0.3, 1.0) | 10.8 (8.2, 13.4)  |
| Suriname     | Men   | Ages 45 to 64     | 0.0473 | 0.7 (0.2, 1.2) | 27 (24, 29) | 2 (1, 2)       | 5 (3, 6)          | 0 (0, 0)     | 7 (5, 8)          | 33 (20, 48)   | 105 (73, 135)   | 2 (1, 3)    | 141 (102, 179)   | 1.8 (1.1, 2.5) | 13.2 (9.1, 16.9)  | 0.4 (0.2, 0.7) | 5.0 (3.6, 6.4)    |
| Suriname     | Men   | Ages 65 and older | 0.0529 | 0.5 (0.2, 0.9) | 25 (22, 29) | 2 (1, 2)       | 5 (3, 6)          | 0 (0, 0)     | 6 (5, 8)          | 111 (70, 154) | 314 (223, 400)  | 7 (4, 10)   | 432 (320, 533)   | 0.7 (0.5, 1.0) | 6.6 (4.7, 8.4)    | 0.2 (0.1, 0.4) | 2.1 (1.5, 2.5)    |
| Suriname     | Men   | Overall           | 0.141  | 0.9 (0.3, 1.6) | 26 (23, 28) | 4 (2, 5)       | 12 (9, 14)        | 0 (0, 0)     | 16 (12, 18)       | 26 (16, 36)   | 82 (66, 97)     | 2 (1, 2)    | 110 (88, 130)    | 1.1 (0.7, 1.6) | 10.1 (8.1, 11.9)  | 0.3 (0.2, 0.5) | 3.4 (2.7, 4.0)    |
| Suriname     | Both  | Overall           | 0.285  | 0.9 (0.3, 1.5) | 27 (23, 30) | 7 (4, 10)      | 26 (22, 29)       | 1 (0, 1)     | 33 (28, 39)       | 24 (15, 33)   | 90 (77, 102)    | 2 (2, 4)    | 116 (97, 137)    | 1.0 (0.6, 1.4) | 8.8 (7.4, 9.9)    | 0.5 (0.3, 0.7) | 3.2 (2.7, 3.8)    |
| Swaziland    | Women | Ages 20 to 44     | 0.0899 | 1.0 (0.3, 1.8) | 27 (26, 28) | 1 (1, 2)       | 10 (8, 12)        | 0 (0, 0)     | 11 (9, 14)        | 9 (5, 14)     | 71 (54, 87)     | 1 (1, 1)    | 81 (63, 98)      | 3.2 (1.7, 5.1) | 21.5 (16.2, 26.1) | 0.9 (0.6, 1.3) | 13.4 (10.4, 16.2) |
| Swaziland    | Women | Ages 45 to 64     | 0.0676 | 0.5 (0.1, 0.9) | 31 (29, 32) | 2 (1, 3)       | 19 (13, 26)       | 0 (0, 1)     | 21 (15, 28)       | 28 (15, 42)   | 284 (197, 378)  | 5 (3, 8)    | 317 (225, 416)   | 1.6 (0.9, 2.4) | 9.9 (6.9, 13.2)   | 0.7 (0.4, 1.0) | 7.3 (5.2, 9.5)    |
| Swaziland    | Women | Ages 65 and older | 0.0726 | 0.4 (0.1, 0.6) | 29 (25, 32) | 3 (2, 4)       | 21 (14, 27)       | 0 (0, 1)     | 24 (17, 31)       | 133 (79, 191) | 899 (608, 1181) | 18 (10, 26) | 1050 (750, 1360) | 0.8 (0.5, 1.1) | 5.8 (3.9, 7.6)    | 0.6 (0.3, 0.9) | 3.5 (2.5, 4.5)    |
| Swaziland    | Women | Overall           | 0.23   | 0.7 (0.2, 1.1) | 28 (26, 31) | 6 (4, 9)       | 50 (40, 60)       | 1 (1, 1)     | 57 (46, 68)       | 27 (16, 38)   | 216 (173, 260)  | 4 (2, 5)    | 247 (200, 295)   | 1.1 (0.7       |                   |                |                   |

|                      |       |                   |        |                |             |                |                   |             |                   |               |                |            |                |                |                   |                |                |
|----------------------|-------|-------------------|--------|----------------|-------------|----------------|-------------------|-------------|-------------------|---------------|----------------|------------|----------------|----------------|-------------------|----------------|----------------|
| Switzerland          | Men   | Ages 45 to 64     | 1.07   | 0.1 (0.1, 0.2) | 28 (26, 29) | 6 (4, 9)       | 10 (7, 14)        | 2 (1, 3)    | 19 (14, 24)       | 6 (4, 8)      | 10 (6, 13)     | 2 (1, 3)   | 18 (13, 22)    | 0.7 (0.4, 1.0) | 5.7 (3.7, 7.5)    | 0.3 (0.1, 0.4) | 1.1 (0.8, 1.4) |
| Switzerland          | Men   | Ages 65 and older | 1.15   | 0.1 (0.1, 0.1) | 28 (26, 30) | 22 (12, 34)    | 36 (27, 45)       | 6 (3, 8)    | 64 (46, 81)       | 39 (21, 60)   | 63 (47, 79)    | 10 (6, 14) | 112 (81, 141)  | 0.3 (0.2, 0.4) | 2.6 (1.9, 3.2)    | 0.2 (0.1, 0.3) | 0.6 (0.4, 0.7) |
| Switzerland          | Men   | Overall           | 2.69   | 0.2 (0.2, 0.2) | 27 (25, 28) | 30 (17, 44)    | 48 (38, 58)       | 8 (5, 11)   | 85 (64, 106)      | 11 (6, 16)    | 18 (14, 22)    | 3 (2, 4)   | 32 (24, 39)    | 0.3 (0.2, 0.5) | 3.0 (2.4, 3.6)    | 0.2 (0.1, 0.3) | 0.6 (0.5, 0.8) |
| Switzerland          | Both  | Overall           | 5.57   | 0.2 (0.1, 0.2) | 26 (24, 28) | 57 (32, 85)    | 96 (79, 112)      | 16 (9, 22)  | 168 (129, 210)    | 10 (6, 15)    | 17 (14, 20)    | 3 (2, 4)   | 30 (23, 38)    | 0.3 (0.2, 0.4) | 2.6 (2.1, 3.0)    | 0.2 (0.1, 0.3) | 0.5 (0.4, 0.7) |
| Syrian Arab Republic | Women | Ages 20 to 44     | 1.54   | 0.8 (0.2, 1.3) | 27 (26, 28) | 14 (9, 20)     | 9 (7, 11)         | 0 (0, 1)    | 24 (17, 30)       | 5 (3, 8)      | 3 (2, 4)       | 0 (0, 0)   | 9 (6, 11)      | 2.1 (1.3, 3.1) | 17.1 (12.8, 21.5) | 0.5 (0.3, 0.8) | 2.8 (2.0, 3.6) |
| Syrian Arab Republic | Women | Ages 45 to 64     | 1.3    | 0.4 (0.1, 0.7) | 31 (30, 33) | 26 (16, 37)    | 24 (16, 32)       | 1 (1, 1)    | 51 (38, 66)       | 20 (12, 29)   | 19 (13, 25)    | 1 (0, 1)   | 40 (29, 51)    | 1.2 (0.7, 1.7) | 9.3 (6.2, 12.1)   | 0.4 (0.2, 0.6) | 1.9 (1.4, 2.4) |
| Syrian Arab Republic | Women | Ages 65 and older | 1.58   | 0.3 (0.1, 0.5) | 30 (26, 33) | 44 (25, 63)    | 30 (21, 38)       | 1 (1, 1)    | 74 (53, 98)       | 102 (59, 147) | 70 (49, 90)    | 2 (1, 3)   | 174 (125, 229) | 0.5 (0.3, 0.8) | 4.6 (3.2, 5.9)    | 0.4 (0.2, 0.6) | 0.8 (0.6, 1.1) |
| Syrian Arab Republic | Women | Overall           | 4.42   | 0.5 (0.2, 0.9) | 29 (27, 31) | 84 (51, 118)   | 63 (51, 75)       | 2 (1, 3)    | 149 (110, 190)    | 19 (12, 27)   | 14 (12, 17)    | 1 (0, 1)   | 34 (25, 43)    | 0.8 (0.5, 1.1) | 6.5 (5.3, 7.8)    | 0.4 (0.3, 0.6) | 1.2 (0.9, 1.5) |
| Syrian Arab Republic | Men   | Ages 20 to 44     | 1.49   | 0.8 (0.3, 1.4) | 26 (25, 27) | 32 (20, 45)    | 15 (11, 19)       | 0 (0, 0)    | 47 (34, 61)       | 12 (8, 17)    | 6 (4, 7)       | 0 (0, 0)   | 18 (13, 23)    | 2.2 (1.4, 3.2) | 18.7 (14.0, 23.5) | 0.3 (0.2, 0.5) | 2.8 (2.1, 3.7) |
| Syrian Arab Republic | Men   | Ages 45 to 64     | 1.31   | 0.4 (0.1, 0.7) | 28 (27, 30) | 53 (32, 76)    | 25 (17, 33)       | 1 (0, 1)    | 79 (54, 106)      | 41 (25, 58)   | 19 (13, 26)    | 0 (0, 1)   | 61 (42, 81)    | 1.2 (0.7, 1.7) | 9.4 (6.4, 12.4)   | 0.3 (0.2, 0.4) | 1.5 (1.1, 2.0) |
| Syrian Arab Republic | Men   | Ages 65 and older | 1.5    | 0.3 (0.1, 0.5) | 27 (25, 29) | 55 (32, 77)    | 27 (19, 35)       | 1 (0, 1)    | 83 (58, 108)      | 145 (86, 205) | 73 (51, 93)    | 2 (1, 3)   | 220 (154, 287) | 0.6 (0.3, 0.8) | 4.9 (3.5, 6.2)    | 0.2 (0.1, 0.4) | 0.8 (0.5, 1.0) |
| Syrian Arab Republic | Men   | Overall           | 4.29   | 0.5 (0.2, 0.9) | 27 (25, 29) | 140 (85, 196)  | 68 (55, 80)       | 2 (1, 2)    | 209 (150, 272)    | 33 (20, 46)   | 16 (13, 19)    | 0 (0, 1)   | 49 (35, 63)    | 0.9 (0.6, 1.3) | 7.4 (6.1, 8.8)    | 0.3 (0.2, 0.4) | 1.2 (0.8, 1.5) |
| Syrian Arab Republic | Both  | Overall           | 8.71   | 0.5 (0.2, 0.9) | 28 (26, 30) | 224 (135, 314) | 131 (113, 149)    | 4 (2, 5)    | 359 (257, 459)    | 26 (16, 36)   | 15 (13, 17)    | 0 (0, 1)   | 41 (30, 53)    | 0.9 (0.5, 1.2) | 7.0 (6.0, 7.9)    | 0.4 (0.2, 0.5) | 1.2 (0.8, 1.5) |
| Taiwan               | Women | Ages 20 to 44     | 1.94   | 1.1 (0.8, 1.3) | 22 (21, 23) | 1 (1, 2)       | 20 (14, 26)       | 1 (0, 1)    | 22 (16, 28)       | 0 (0, 0)      | 5 (4, 7)       | 0 (0, 0)   | 6 (4, 8)       | 1.2 (0.6, 1.9) | 17.3 (11.9, 22.5) | 0.2 (0.1, 0.3) | 4.0 (2.9, 5.2) |
| Taiwan               | Women | Ages 45 to 64     | 3.11   | 0.5 (0.4, 0.6) | 24 (23, 25) | 5 (2, 7)       | 133 (85, 182)     | 3 (1, 5)    | 141 (93, 189)     | 1 (1, 2)      | 43 (27, 58)    | 1 (0, 1)   | 45 (30, 61)    | 0.6 (0.3, 1.0) | 9.2 (5.9, 12.6)   | 0.2 (0.1, 0.3) | 4.1 (2.7, 5.5) |
| Taiwan               | Women | Ages 65 and older | 3.12   | 0.4 (0.3, 0.5) | 24 (23, 25) | 22 (11, 36)    | 374 (271, 471)    | 4 (2, 6)    | 401 (297, 503)    | 17 (8, 28)    | 291 (211, 366) | 3 (1, 4)   | 311 (231, 391) | 0.2 (0.1, 0.3) | 4.1 (3.0, 5.1)    | 0.1 (0.1, 0.2) | 2.1 (1.6, 2.7) |
| Taiwan               | Women | Overall           | 8.17   | 0.7 (0.5, 0.8) | 23 (22, 24) | 28 (14, 43)    | 528 (415, 641)    | 7 (4, 11)   | 563 (449, 682)    | 3 (2, 5)      | 65 (51, 78)    | 1 (0, 1)   | 69 (55, 83)    | 0.2 (0.1, 0.4) | 4.9 (3.9, 6.0)    | 0.1 (0.1, 0.2) | 2.5 (2.0, 3.0) |
| Taiwan               | Men   | Ages 20 to 44     | 1.97   | 1.1 (0.8, 1.4) | 24 (24, 25) | 6 (3, 9)       | 62 (39, 83)       | 2 (1, 2)    | 69 (45, 89)       | 1 (1, 2)      | 16 (10, 22)    | 0 (0, 1)   | 18 (12, 23)    | 1.3 (0.6, 1.9) | 18.6 (11.7, 24.9) | 0.4 (0.2, 0.7) | 7.0 (4.6, 9.1) |
| Taiwan               | Men   | Ages 45 to 64     | 3.06   | 0.5 (0.4, 0.7) | 25 (24, 26) | 26 (17, 35)    | 250 (171, 328)    | 11 (8, 15)  | 287 (205, 368)    | 8 (5, 11)     | 82 (56, 107)   | 4 (2, 5)   | 94 (67, 120)   | 1.0 (0.7, 1.4) | 10.3 (7.1, 13.5)  | 0.5 (0.3, 0.7) | 4.6 (3.3, 6.0) |
| Taiwan               | Men   | Ages 65 and older | 3.01   | 0.4 (0.3, 0.5) | 24 (23, 25) | 28 (14, 45)    | 335 (244, 427)    | 9 (4, 13)   | 372 (273, 466)    | 24 (12, 38)   | 283 (206, 360) | 7 (4, 11)  | 314 (230, 393) | 0.2 (0.1, 0.4) | 4.5 (3.3, 5.7)    | 0.1 (0.1, 0.2) | 1.8 (1.3, 2.2) |
| Taiwan               | Men   | Overall           | 8.05   | 0.7 (0.5, 0.9) | 24 (24, 25) | 59 (37, 83)    | 647 (520, 775)    | 21 (14, 30) | 728 (588, 869)    | 7 (5, 10)     | 80 (65, 96)    | 3 (2, 4)   | 90 (73, 108)   | 0.4 (0.3, 0.6) | 6.3 (5.1, 7.6)    | 0.3 (0.2, 0.4) | 2.6 (2.1, 3.1) |
| Taiwan               | Both  | Overall           | 16.2   | 0.7 (0.5, 0.9) | 24 (23, 25) | 87 (53, 125)   | 1175 (1006, 1345) | 29 (18, 41) | 1291 (1110, 1475) | 5 (3, 8)      | 72 (62, 83)    | 2 (1, 3)   | 80 (68, 91)    | 0.3 (0.2, 0.5) | 5.6 (4.8, 6.4)    | 0.2 (0.1, 0.3) | 2.5 (2.2, 2.9) |
| Tajikistan           | Women | Ages 20 to 44     | 0.504  | 0.2 (0.0, 0.3) | 23 (20, 25) | 1 (0, 1)       | 5 (3, 6)          | 0 (0, 0)    | 6 (4, 7)          | 1 (0, 1)      | 6 (4, 7)       | 0 (0, 0)   | 7 (5, 8)       | 0.5 (0.2, 0.7) | 7.7 (5.6, 10.1)   | 0.1 (0.1, 0.2) | 1.6 (1.2, 2.1) |
| Tajikistan           | Women | Ages 45 to 64     | 0.437  | 0.1 (0.0, 0.1) | 25 (22, 28) | 6 (4, 8)       | 13 (9, 17)        | 1 (0, 1)    | 20 (15, 25)       | 14 (8, 19)    | 30 (21, 39)    | 2 (1, 2)   | 45 (33, 57)    | 0.7 (0.4, 0.9) | 5.3 (3.7, 6.9)    | 0.3 (0.2, 0.5) | 1.4 (1.1, 1.8) |
| Tajikistan           | Women | Ages 65 and older | 0.504  | 0.1 (0.0, 0.1) | 24 (19, 30) | 6 (3, 10)      | 7 (5, 9)          | 0 (0, 0)    | 13 (9, 18)        | 45 (23, 71)   | 52 (34, 69)    | 2 (1, 3)   | 99 (68, 134)   | 0.2 (0.1, 0.2) | 2.8 (1.9, 3.8)    | 0.2 (0.1, 0.3) | 0.2 (0.2, 0.3) |
| Tajikistan           | Women | Overall           | 1.44   | 0.2 (0.0, 0.2) | 24 (20, 28) | 13 (9, 17)     | 25 (20, 30)       | 1 (1, 2)    | 39 (31, 46)       | 9 (6, 12)     | 17 (14, 21)    | 1 (1, 1)   | 27 (22, 32)    | 0.1 (0.1, 0.3) | 4.5 (3.6, 5.4)    | 0.2 (0.2, 0.3) | 0.5 (0.4, 0.6) |
| Tajikistan           | Men   | Ages 20 to 44     | 0.464  | 0.2 (0.1, 0.3) | 23 (21, 26) | 2 (1, 2)       | 7 (5, 9)          | 0 (0, 0)    | 9 (7, 11)         | 2 (1, 3)      | 9 (7, 12)      | 0 (0, 0)   | 11 (8, 14)     | 0.5 (0.2, 0.7) | 7.9 (5.6, 10.2)   | 0.1 (0.1, 0.2) | 1.9 (1.4, 2.4) |
| Tajikistan           | Men   | Ages 45 to 64     | 0.39   | 0.1 (0.0, 0.1) | 25 (22, 27) | 5 (3, 8)       | 16 (11, 21)       | 0 (0, 1)    | 21 (15, 27)       | 13 (7, 20)    | 40 (27, 53)    | 1 (0, 1)   | 54 (38, 70)    | 0.3 (0.2, 0.4) | 5.0 (3.4, 6.6)    | 0.2 (0.1, 0.3) | 0.9 (0.7, 1.2) |
| Tajikistan           | Men   | Ages 65 and older | 0.421  | 0.1 (0.0, 0.1) | 24 (20, 27) | 6 (3, 9)       | 7 (4, 9)          | 0 (0, 1)    | 13 (9, 17)        | 57 (29, 88)   | 66 (41, 92)    | 3 (2, 5)   | 126 (86, 168)  | 0.2 (0.1, 0.2) | 3.1 (1.9, 4.3)    | 0.2 (0.1, 0.3) | 0.3 (0.2, 0.4) |
| Tajikistan           | Men   | Overall           | 1.28   | 0.1 (0.0, 0.2) | 24 (21, 27) | 12 (6, 19)     | 30 (23, 36)       | 1 (0, 1)    | 43 (34, 53)       | 10 (5, 15)    | 23 (18, 28)    | 1 (0, 1)   | 34 (26, 42)    | 0.2 (0.1, 0.3) | 4.8 (3.7, 5.7)    | 0.2 (0.1, 0.3) | 0.6 (0.5, 0.7) |
| Tajikistan           | Both  | Overall           | 2.72   | 0.1 (0.0, 0.2) | 24 (21, 27) | 25 (16, 36)    | 55 (46, 63)       | 2 (1, 3)    | 82 (67, 97)       | 9 (6, 13)     | 20 (17, 23)    | 1 (0, 1)   | 30 (25, 36)    | 0.2 (0.1, 0.3) | 4.6 (3.9, 5.3)    | 0.2 (0.1, 0.3) | 0.6 (0.5, 0.7) |
| Thailand             | Women | Ages 20 to 44     | 5.38   | 0.9 (0.7, 1.2) | 24 (23, 25) | 13 (8, 20)     | 78 (52, 102)      | 3 (2, 5)    | 94 (67, 121)      | 1 (1, 2)      | 7 (5, 9)       | 0 (0, 0)   | 8 (6, 11)      | 2.3 (1.4, 3.4) | 18.1 (12.0, 23.8) | 0.5 (0.3, 0.7) | 5.7 (4.0, 7.3) |
| Thailand             | Women | Ages 45 to 64     | 8.57   | 0.5 (0.4, 0.6) | 25 (24, 27) | 74 (44, 108)   | 631 (430, 833)    | 18 (10, 27) | 723 (512, 939)    | 9 (5, 13)     | 74 (50, 97)    | 2 (1, 3)   | 84 (60, 110)   | 1.5 (0.9, 2.1) | 10.0 (6.8, 13.2)  | 0.5 (0.3, 0.7) | 5.6 (3.9, 7.2) |
| Thailand             | Women | Ages 65 and older | 9.16   | 0.4 (0.3, 0.4) | 23 (22, 24) | 93 (44, 147)   | 869 (621, 1142)   | 11 (6, 18)  | 973 (711, 1248)   | 27 (13, 43)   | 253 (181, 333) | 3 (2, 5)   | 283 (207, 364) | 0.2 (0.1, 0.4) | 4.5 (3.2, 5.9)    | 0.2 (0.1, 0.3) | 1.6 (1.2, 2.0) |
| Thailand             | Women | Overall           | 23.1   | 0.6 (0.5, 0.8) | 24 (23, 25) | 180 (121, 244) | 1578 (1254, 1929) | 32 (21, 44) | 1790 (1442, 2146) | 8 (5, 11)     | 68 (54, 83)    | 1 (1, 2)   | 77 (62, 93)    | 0.4 (0.3, 0.5) | 6.0 (4.8, 7.4)    | 0.3 (0.2, 0.4) | 2.3 (1.9, 2.8) |
| Thailand             | Men   | Ages 20 to 44     | 5.44   | 1.2 (0.7, 1.2) | 23 (22, 24) | 26 (13, 40)    | 121 (82, 163)     | 2 (1, 3)    | 148 (106, 197)    | 2 (1, 4)      | 11 (8, 15)     | 0 (0, 0)   | 14 (10, 18)    | 1.4 (0.6, 1.9) | 17.6 (11.9, 23.8) | 0.2 (0.1, 0.3) | 4.5 (3.2, 6.0) |
| Thailand             | Men   | Ages 45 to 64     | 7.85   | 0.5 (0.4, 0.7) | 24 (23, 25) | 58 (30, 87)    | 454 (295, 605)    | 8 (4, 13)   | 521 (354, 678)    | 7 (4, 11)     | 58 (38, 77)    | 1 (1, 2)   | 66 (45, 86)    | 0.6 (0.3, 0.9) | 9.8 (6.4, 13.0)   | 0.2 (0.1, 0.3) | 3.2 (2.2, 4.2) |
| Thailand             | Men   | Ages 65 and older | 8.05   | 0.4 (0.3, 0.5) | 22 (21, 23) | 67 (34, 103)   | 450 (322, 577)    | 12 (6, 17)  | 529 (383, 670)    | 25 (12, 38)   | 166 (119, 213) | 4 (2, 6)   | 195 (141, 247) | 0.3 (0.1, 0.4) | 4.9 (3.5, 6.2)    | 0.1 (0.1, 0.2) | 1.3 (1.0, 1.7) |
| Thailand             | Men   | Overall           | 21.03  | 0.6 (0.5, 0.8) | 23 (22, 24) | 152 (77, 230)  | 1025 (816, 1246)  | 22 (11, 34) | 1198 (970, 1442)  | 7 (4, 11)     | 48 (38, 58)    | 1 (1, 2)   | 56 (45, 68)    | 0.4 (0.2, 0.6) | 7.0 (5.6, 8.5)    | 0.2 (0.1, 0.2) | 2.0 (1.7, 2.5) |
| Thailand             | Both  | Overall           | 44.5   | 0.6 (0.5, 0.8) | 23 (22, 24) | 332 (208, 463) | 2603 (2222, 2991) | 54 (36, 74) | 2989 (2563, 3430) | 7 (5, 10)     | 59 (50, 67)    | 1 (1, 2)   | 67 (58, 77)    | 0.4 (0.2, 0.5) | 6.4 (5.5, 7.3)    | 0.2 (0.2, 0.3) | 2.2 (1.9, 2.5) |
| Timor-Leste          | Women | Ages 20 to 44     | 0.0625 | 0.3 (0.1, 0.6) | 21 (18, 25) | 0 (0, 0)       | 1 (0, 1)          | 0 (0, 0)    | 1 (1, 1)          | 1 (0, 2)      | 6 (4, 8)       | 0 (0, 0)   | 7 (5, 10)      | 0.5 (0.3, 0.8) | 8.4 (5.4, 11.4)   | 0.1 (0.1, 0.2) | 2.4 (1.7, 3.2) |
| Timor-Leste          | Women | Ages 45 to 64     | 0.0607 | 0.2 (0.0, 0.3) | 22 (18, 26) | 0 (0, 1)       | 3 (2, 4)          | 0 (0, 0)    | 4 (2, 5)          | 7 (3, 11)     | 52 (34, 70)    | 1 (0, 1)   | 60 (41, 78)    | 0.4 (0.2, 0.6) | 5.7 (3.8, 7.8)    | 0.1 (0.1, 0.2) | 1.9 (1.3, 2.5) |
| Timor-Leste          | Women | Ages 65 and older | 0.0627 | 0.1 (0.0, 0.2) | 21 (16, 27) | 0 (0, 1)       | 3 (2, 4)          | 0 (0, 0)    | 3 (2, 4)          | 28 (14, 42)   | 154 (100, 216) | 2 (1, 2)   | 183 (124, 244) | 0.2 (0.1, 0.3) | 3.2 (2.1, 4.5)    | 0.1 (0.1, 0.2) | 0.8 (0.6, 1.1) |
| Timor-Leste          | Women | Overall           | 0.186  | 0.2 (0.1, 0.4) | 21 (17, 26) | 1 (1, 2)       | 7 (5, 8)          | 0 (0, 0)    | 8 (6, 9)          | 5 (3, 8)      | 35 (27, 43)    | 0 (0, 1)   | 41 (31, 50)    | 0.2 (0.1, 0.4) | 4.4 (3.4, 5.4)    | 0.1 (0.1, 0.2) | 1.3 (1.0, 1.6) |
| Timor-Leste          | Men   | Ages 20 to 44     | 0.0682 | 0.3 (0.1, 0.6) | 21 (18, 23) | 0 (0, 0)       | 0 (0, 0)          | 0 (0, 0)    | 0 (0, 0)          | 0 (0, 0)      | 0 (0, 0)       | 0 (0, 0)   | 0 (0, 0)       | 0.0 (0.0, 0.0) | 0.0 (0.0, 0.0)    | 0.0 (0.0, 0.0) | 0.0 (0.0, 0.0) |
| Timor-Leste          | Men   | Ages 45 to 64     | 0.0573 | 0.2 (0.1, 0.3) | 21 (18, 24) | 0 (0, 0)       | 0 (0, 0)          | 0 (0, 0)    | 0 (0, 0)          | 0 (0, 0)      | 0 (0, 0)       | 0 (0, 0)   | 0 (0, 0)       | 0.0 (0.0, 0.0) | 0.0 (0.0, 0.0)    | 0.0 (0.0, 0.0) | 0.0 (0.0, 0.0) |
| Timor-Leste          | Men   | Ages 65 and older | 0.0648 | 0.1 (0.0, 0.2) | 20 (17, 24) | 0 (0, 0)       | 0 (0, 0)          | 0 (0, 0)    | 0 (0, 0)          | 0 (0, 0)      | 0 (0, 0)       | 0 (0, 0)   | 0 (0, 0)       | 0.0 (0.0, 0.0) | 0.0 (0.0, 0.0)    | 0.0 (0.0, 0.0) | 0.0 (0.0, 0.0) |
| Timor-Leste          | Men   | Overall           | 0.19   | 0.2 (0.1, 0.4) | 20 (17, 23) | 0 (0, 0)       | 0 (0, 0)          | 0 (0, 0)    | 0 (0, 0)          | 0 (0, 0)      | 0 (0, 0)       | 0 (0, 0)   | 0 (0, 0)       | 0.0 (0.0, 0.0) | 0.0 (0.0, 0.0)    | 0.0 (0.0, 0.0) | 0.0 (0.0, 0.0) |
| Timor-Leste          | Both  | Overall           | 0.376  | 0.2 (0.1, 0.4) | 21 (17, 25) | 1 (1, 2)       | 7 (5, 8)          | 0 (0, 0)    | 8 (6, 9)          | 3 (1, 4)      | 17 (13, 21)    | 0 (0, 0)   | 20 (16, 25)    | 0.1 (0.1, 0.2) | 2.8 (2.1, 3.4)    | 0.1 (0.0, 0.1) | 0.7 (0.5, 0.9) |
| Togo                 | Women | Ages 20 to 44     | 0.469  | 0.3 (0.1, 0.5) | 23 (21, 24) | 1 (0, 1)       | 9 (6, 11)         | 0 (0, 0)    | 9 (7, 12)         | 1 (0, 1)      | 11 (8, 14)     | 0 (0, 0)   | 12 (9, 15)     | 0.6 (0.3, 1.0) | 9.3 (6.7, 11.8)   | 0.1 (0.1, 0.2) | 4.1 (3.0, 5.1) |
| Togo                 | Women | Ages 45 to 64     | 0.333  | 0.1 (0.0, 0.2) | 23 (21, 26) | 1 (1, 2)       | 13 (9, 18)        | 0 (0, 0)    | 15 (10, 20)       | 4 (2, 6)      | 40 (26, 54)    | 0 (0, 1)   | 44 (31, 59)    | 0.3 (0.2, 0.5) | 5.4 (3.5, 7.3)    |                |                |



|                     |       |                   |       |                |             |                  |                |             |                   |                |                    |             |                   |                |                   |                |                   |
|---------------------|-------|-------------------|-------|----------------|-------------|------------------|----------------|-------------|-------------------|----------------|--------------------|-------------|-------------------|----------------|-------------------|----------------|-------------------|
| Trinidad and Tobago | Women | Ages 65 and older | 0.155 | 0.7 (0.2, 1.2) | 26 (22, 30) | 8 (5, 10)        | 77 (55, 97)    | 1 (0, 1)    | 85 (63, 106)      | 129 (83, 177)  | 1321 (952, 1675)   | 12 (8, 16)  | 1462 (1091, 1833) | 0.7 (0.4, 1.0) | 7.1 (5.2, 9.1)    | 0.4 (0.3, 0.6) | 4.4 (3.3, 5.5)    |
| Trinidad and Tobago | Women | Overall           | 0.437 | 1.2 (0.4, 2.1) | 28 (25, 31) | 13 (8, 18)       | 151 (121, 182) | 2 (1, 2)    | 166 (133, 199)    | 30 (19, 41)    | 346 (278, 417)     | 4 (2, 5)    | 379 (305, 456)    | 1.0 (0.6, 1.4) | 9.8 (7.9, 11.9)   | 0.5 (0.3, 0.7) | 6.4 (5.2, 7.7)    |
| Trinidad and Tobago | Men   | Ages 20 to 44     | 0.125 | 2.0 (0.6, 3.3) | 26 (24, 28) | 2 (1, 3)         | 12 (9, 15)     | 0 (0, 0)    | 14 (11, 17)       | 9 (5, 13)      | 57 (42, 70)        | 1 (0, 1)    | 66 (50, 81)       | 4.7 (2.9, 7.0) | 30.5 (22.5, 37.9) | 0.7 (0.4, 1.0) | 18.8 (14.3, 23.1) |
| Trinidad and Tobago | Men   | Ages 45 to 64     | 0.138 | 0.9 (0.3, 1.6) | 28 (25, 30) | 11 (7, 16)       | 98 (69, 129)   | 1 (0, 1)    | 110 (79, 142)     | 80 (48, 117)   | 712 (503, 932)     | 5 (3, 7)    | 797 (573, 1033)   | 2.2 (1.3, 3.1) | 15.6 (11.0, 20.5) | 0.5 (0.2, 0.8) | 11.2 (8.1, 14.6)  |
| Trinidad and Tobago | Men   | Ages 65 and older | 0.127 | 0.7 (0.2, 1.2) | 27 (24, 29) | 11 (6, 16)       | 77 (52, 99)    | 1 (0, 1)    | 88 (63, 111)      | 308 (183, 438) | 168 (146.2, 278.8) | 18 (10, 25) | 2494 (1786, 3125) | 1.0 (0.6, 1.4) | 8.3 (5.6, 10.6)   | 0.3 (0.2, 0.5) | 5.0 (3.6, 6.2)    |
| Trinidad and Tobago | Men   | Overall           | 0.39  | 1.2 (0.4, 2.1) | 27 (24, 29) | 24 (15, 34)      | 187 (149, 224) | 1 (1, 2)    | 212 (169, 253)    | 61 (38, 87)    | 480 (382, 574)     | 4 (2, 5)    | 545 (433, 648)    | 1.5 (0.9, 2.1) | 11.7 (9.3, 14.4)  | 0.4 (0.2, 0.6) | 7.5 (6.0, 8.9)    |
| Trinidad and Tobago | Both  | Overall           | 0.827 | 1.2 (0.4, 2.1) | 27 (24, 30) | 37 (23, 51)      | 338 (287, 390) | 3 (2, 4)    | 378 (319, 440)    | 45 (28, 62)    | 409 (347, 472)     | 4 (2, 5)    | 457 (386, 532)    | 1.3 (0.8, 1.7) | 10.8 (9.2, 12.5)  | 0.5 (0.3, 0.7) | 7.0 (5.9, 8.1)    |
| Tunisia             | Women | Ages 20 to 44     | 0.945 | 0.5 (0.1, 0.9) | 26 (25, 28) | 3 (2, 4)         | 7 (5, 9)       | 1 (0, 1)    | 10 (7, 13)        | 2 (1, 2)       | 4 (3, 5)           | 0 (0, 1)    | 6 (4, 8)          | 1.8 (1.1, 2.5) | 13.2 (9.2, 17.2)  | 0.3 (0.2, 0.5) | 2.5 (1.8, 3.1)    |
| Tunisia             | Women | Ages 45 to 64     | 0.974 | 0.3 (0.1, 0.5) | 30 (28, 32) | 12 (7, 17)       | 36 (24, 47)    | 2 (1, 2)    | 50 (36, 63)       | 12 (7, 17)     | 37 (25, 49)        | 2 (1, 2)    | 51 (37, 64)       | 1.0 (0.6, 1.5) | 7.6 (5.1, 10.0)   | 0.3 (0.2, 0.4) | 2.3 (1.7, 2.9)    |
| Tunisia             | Women | Ages 65 and older | 1.14  | 0.2 (0.1, 0.4) | 29 (25, 33) | 27 (16, 41)      | 68 (49, 87)    | 2 (1, 3)    | 97 (73, 123)      | 71 (42, 106)   | 177 (127, 227)     | 5 (3, 7)    | 253 (190, 320)    | 0.5 (0.3, 0.7) | 3.8 (2.7, 4.9)    | 0.3 (0.2, 0.4) | 1.2 (0.9, 1.5)    |
| Tunisia             | Women | Overall           | 3.06  | 0.4 (0.1, 0.6) | 28 (26, 31) | 42 (25, 60)      | 111 (88, 136)  | 4 (2, 6)    | 157 (124, 191)    | 14 (8, 20)     | 36 (29, 44)        | 1 (1, 2)    | 51 (40, 62)       | 0.6 (0.3, 0.8) | 4.8 (3.8, 5.9)    | 0.3 (0.2, 0.4) | 1.5 (1.1, 4.8)    |
| Tunisia             | Men   | Ages 20 to 44     | 0.959 | 0.6 (0.2, 1.0) | 24 (23, 26) | 7 (4, 9)         | 8 (6, 11)      | 0 (0, 0)    | 15 (12, 19)       | 4 (3, 5)       | 5 (4, 7)           | 0 (0, 0)    | 9 (7, 11)         | 1.4 (0.9, 2.0) | 13.7 (9.8, 17.6)  | 0.1 (0.0, 0.1) | 2.6 (2.0, 3.3)    |
| Tunisia             | Men   | Ages 45 to 64     | 0.951 | 0.3 (0.1, 0.5) | 26 (25, 28) | 23 (14, 32)      | 37 (25, 50)    | 1 (0, 1)    | 61 (45, 78)       | 24 (15, 34)    | 39 (27, 52)        | 1 (1, 1)    | 64 (47, 82)       | 1.0 (0.6, 1.4) | 7.6 (5.2, 10.2)   | 0.1 (0.1, 0.2) | 2.0 (1.5, 2.6)    |
| Tunisia             | Men   | Ages 65 and older | 1.06  | 0.2 (0.1, 0.4) | 26 (23, 28) | 34 (20, 49)      | 61 (43, 78)    | 1 (1, 2)    | 96 (72, 121)      | 98 (58, 143)   | 176 (126, 226)     | 4 (2, 6)    | 277 (208, 350)    | 0.5 (0.3, 0.7) | 4.0 (2.8, 5.1)    | 0.1 (0.1, 0.2) | 1.1 (0.8, 1.4)    |
| Tunisia             | Men   | Overall           | 2.97  | 0.4 (0.1, 0.6) | 25 (24, 27) | 63 (39, 90)      | 106 (86, 126)  | 2 (1, 3)    | 172 (134, 209)    | 21 (13, 30)    | 36 (29, 42)        | 1 (0, 1)    | 58 (45, 70)       | 0.7 (0.4, 0.9) | 5.1 (4.1, 6.1)    | 0.1 (0.1, 0.2) | 1.4 (1.1, 1.7)    |
| Tunisia             | Both  | Overall           | 6.03  | 0.4 (0.1, 0.6) | 27 (25, 29) | 105 (64, 148)    | 217 (185, 248) | 6 (4, 9)    | 329 (263, 394)    | 17 (11, 25)    | 36 (31, 41)        | 1 (1, 2)    | 55 (44, 65)       | 0.6 (0.4, 0.9) | 5.0 (4.2, 5.7)    | 0.2 (0.1, 0.2) | 1.4 (1.1, 1.7)    |
| Turkey              | Women | Ages 20 to 44     | 6.33  | 0.4 (0.3, 0.5) | 26 (26, 27) | 31 (19, 44)      | 30 (21, 38)    | 4 (3, 6)    | 65 (48, 84)       | 3 (2, 4)       | 3 (2, 3)           | 0 (0, 1)    | 6 (4, 7)          | 1.4 (0.9, 2.1) | 11.4 (8.2, 14.5)  | 0.3 (0.2, 0.4) | 1.6 (1.2, 2.0)    |
| Turkey              | Women | Ages 45 to 64     | 6.8   | 0.2 (0.2, 0.3) | 31 (30, 32) | 85 (51, 121)     | 112 (75, 148)  | 11 (6, 15)  | 208 (154, 267)    | 13 (8, 18)     | 17 (11, 22)        | 2 (1, 2)    | 31 (23, 39)       | 0.9 (0.5, 1.3) | 6.6 (4.4, 8.6)    | 0.3 (0.2, 0.4) | 1.3 (1.0, 1.7)    |
| Turkey              | Women | Ages 65 and older | 7.59  | 0.2 (0.1, 0.2) | 29 (28, 30) | 164 (96, 235)    | 220 (158, 297) | 11 (6, 16)  | 394 (287, 497)    | 68 (40, 97)    | 91 (65, 116)       | 4 (3, 6)    | 163 (119, 206)    | 0.4 (0.2, 0.6) | 3.4 (2.5, 4.3)    | 0.2 (0.1, 0.4) | 0.8 (0.6, 1.0)    |
| Turkey              | Women | Overall           | 20.7  | 0.3 (0.2, 0.3) | 29 (28, 29) | 280 (168, 398)   | 362 (290, 433) | 26 (15, 36) | 667 (516, 824)    | 13 (8, 19)     | 17 (14, 21)        | 1 (1, 2)    | 32 (25, 40)       | 0.5 (0.3, 0.8) | 4.3 (3.4, 5.2)    | 0.3 (0.2, 0.4) | 0.9 (0.7, 1.2)    |
| Turkey              | Men   | Ages 20 to 44     | 6.4   | 0.4 (0.3, 0.5) | 26 (25, 26) | 89 (56, 125)     | 47 (33, 61)    | 3 (2, 4)    | 139 (100, 182)    | 8 (5, 11)      | 4 (3, 5)           | 0 (0, 0)    | 12 (9, 16)        | 1.4 (0.9, 2.0) | 11.7 (8.2, 15.0)  | 0.1 (0.1, 0.2) | 1.8 (1.3, 2.4)    |
| Turkey              | Men   | Ages 45 to 64     | 6.54  | 0.2 (0.2, 0.3) | 28 (28, 29) | 175 (104, 250)   | 117 (81, 152)  | 8 (5, 11)   | 300 (214, 390)    | 27 (16, 38)    | 18 (12, 23)        | 1 (1, 2)    | 46 (33, 60)       | 0.9 (0.5, 1.3) | 6.7 (4.7, 8.7)    | 0.2 (0.1, 0.3) | 1.2 (0.8, 1.5)    |
| Turkey              | Men   | Ages 65 and older | 7.02  | 0.2 (0.1, 0.2) | 27 (27, 28) | 184 (110, 263)   | 151 (108, 194) | 10 (6, 14)  | 344 (248, 444)    | 95 (57, 136)   | 78 (56, 101)       | 5 (3, 7)    | 178 (129, 230)    | 0.5 (0.3, 0.6) | 3.7 (2.6, 4.7)    | 0.1 (0.1, 0.2) | 0.7 (0.5, 0.9)    |
| Turkey              | Men   | Overall           | 20    | 0.2 (0.2, 0.3) | 27 (26, 27) | 448 (273, 636)   | 314 (256, 371) | 20 (12, 29) | 783 (578, 1000)   | 22 (14, 32)    | 16 (13, 19)        | 1 (1, 1)    | 39 (29, 50)       | 0.7 (0.4, 1.0) | 5.0 (4.1, 5.9)    | 0.1 (0.1, 0.2) | 0.9 (0.7, 1.2)    |
| Turkey              | Both  | Overall           | 40.7  | 0.3 (0.2, 0.3) | 28 (27, 28) | 727 (447, 1023)  | 676 (584, 769) | 46 (28, 65) | 1449 (1103, 1801) | 18 (11, 25)    | 17 (14, 19)        | 1 (1, 2)    | 36 (27, 44)       | 0.6 (0.4, 0.9) | 4.6 (4.0, 5.2)    | 0.2 (0.1, 0.3) | 0.9 (0.7, 1.2)    |
| Turkmenistan        | Women | Ages 20 to 44     | 0.423 | 0.1 (0.0, 0.2) | 24 (22, 26) | 2 (1, 2)         | 3 (2, 4)       | 0 (0, 0)    | 5 (4, 6)          | 2 (1, 3)       | 4 (3, 5)           | 0 (0, 1)    | 7 (5, 8)          | 0.7 (0.5, 1.1) | 7.3 (5.1, 9.5)    | 0.2 (0.1, 0.3) | 1.2 (0.9, 1.5)    |
| Turkmenistan        | Women | Ages 45 to 64     | 0.416 | 0.1 (0.0, 0.1) | 26 (23, 28) | 6 (4, 9)         | 10 (7, 13)     | 1 (1, 2)    | 17 (13, 22)       | 15 (9, 21)     | 24 (16, 32)        | 3 (2, 4)    | 42 (31, 53)       | 0.6 (0.4, 0.9) | 5.0 (3.4, 6.6)    | 0.4 (0.2, 0.6) | 1.1 (0.8, 1.4)    |
| Turkmenistan        | Women | Ages 65 and older | 0.448 | 0.0 (0.0, 0.1) | 25 (20, 29) | 9 (6, 12)        | 6 (4, 8)       | 1 (1, 1)    | 16 (12, 20)       | 73 (48, 100)   | 46 (31, 62)        | 7 (5, 10)   | 126 (94, 161)     | 0.2 (0.1, 0.3) | 2.9 (2.0, 4.0)    | 0.3 (0.2, 0.5) | 0.3 (0.2, 0.4)    |
| Turkmenistan        | Women | Overall           | 1.29  | 0.1 (0.0, 0.1) | 25 (22, 27) | 17 (11, 23)      | 19 (15, 22)    | 2 (1, 3)    | 38 (30, 46)       | 13 (9, 18)     | 15 (12, 17)        | 2 (1, 2)    | 30 (23, 36)       | 0.3 (0.2, 0.4) | 4.3 (3.4, 5.2)    | 0.3 (0.2, 0.5) | 0.5 (0.4, 0.6)    |
| Turkmenistan        | Men   | Ages 20 to 44     | 0.415 | 0.1 (0.0, 0.2) | 25 (22, 27) | 5 (3, 6)         | 4 (3, 6)       | 0 (0, 0)    | 9 (7, 11)         | 6 (4, 9)       | 6 (4, 8)           | 0 (0, 0)    | 12 (9, 16)        | 0.8 (0.5, 1.1) | 5.2 (3.6, 6.7)    | 0.3 (0.2, 0.4) | 1.2 (0.9, 1.5)    |
| Turkmenistan        | Men   | Ages 45 to 64     | 0.364 | 0.1 (0.0, 0.1) | 26 (23, 29) | 14 (8, 20)       | 13 (9, 17)     | 1 (1, 2)    | 29 (21, 37)       | 39 (23, 56)    | 36 (25, 48)        | 4 (2, 6)    | 79 (57, 101)      | 0.6 (0.4, 0.9) | 7.5 (5.2, 9.9)    | 0.5 (0.3, 0.8) | 1.0 (0.7, 1.3)    |
| Turkmenistan        | Men   | Ages 65 and older | 0.402 | 0.1 (0.0, 0.1) | 25 (22, 29) | 17 (7, 16)       | 5 (3, 7)       | 1 (1, 2)    | 18 (13, 24)       | 141 (87, 196)  | 61 (40, 81)        | 14 (8, 20)  | 215 (153, 280)    | 0.3 (0.2, 0.4) | 3.3 (2.2, 4.4)    | 0.5 (0.3, 0.7) | 0.4 (0.3, 0.5)    |
| Turkmenistan        | Men   | Overall           | 1.18  | 0.1 (0.0, 0.2) | 25 (22, 28) | 31 (19, 43)      | 23 (18, 27)    | 3 (2, 4)    | 56 (41, 71)       | 26 (16, 36)    | 19 (15, 23)        | 2 (1, 3)    | 47 (35, 60)       | 0.5 (0.3, 0.7) | 4.9 (3.8, 5.9)    | 0.5 (0.3, 0.7) | 0.7 (0.5, 0.9)    |
| Turkmenistan        | Both  | Overall           | 2.47  | 0.1 (0.0, 0.1) | 25 (22, 28) | 48 (30, 65)      | 41 (35, 48)    | 5 (3, 7)    | 94 (73, 116)      | 19 (12, 26)    | 17 (14, 19)        | 2 (1, 3)    | 38 (29, 47)       | 0.4 (0.2, 0.5) | 4.6 (3.9, 5.3)    | 0.4 (0.3, 0.6) | 0.6 (0.5, 0.8)    |
| Uganda              | Women | Ages 20 to 44     | 2.23  | 1.4 (0.4, 2.4) | 23 (22, 23) | 5 (2, 9)         | 53 (39, 66)    | 1 (0, 1)    | 59 (44, 73)       | 2 (1, 3)       | 15 (11, 19)        | 0 (0, 0)    | 17 (13, 21)       | 1.9 (0.9, 3.2) | 24.3 (17.9, 30.2) | 0.4 (0.2, 0.6) | 8.7 (6.5, 10.8)   |
| Uganda              | Women | Ages 45 to 64     | 1.34  | 0.7 (0.2, 1.2) | 23 (21, 24) | 9 (5, 14)        | 97 (62, 128)   | 3 (1, 4)    | 108 (73, 142)     | 7 (3, 11)      | 72 (47, 96)        | 2 (1, 3)    | 81 (55, 106)      | 0.8 (0.4, 1.3) | 11.3 (7.3, 15.0)  | 0.3 (0.2, 0.5) | 4.1 (2.8, 5.4)    |
| Uganda              | Women | Ages 65 and older | 1.74  | 0.5 (0.1, 0.9) | 21 (18, 25) | 15 (8, 23)       | 126 (81, 169)  | 2 (1, 3)    | 143 (95, 189)     | 32 (17, 49)    | 275 (176, 367)     | 4 (2, 6)    | 311 (208, 411)    | 0.3 (0.2, 0.5) | 5.4 (3.5, 7.2)    | 0.3 (0.1, 0.4) | 1.9 (1.3, 2.5)    |
| Uganda              | Women | Overall           | 5.3   | 0.9 (0.3, 1.5) | 22 (20, 24) | 29 (15, 44)      | 276 (218, 333) | 5 (3, 8)    | 311 (245, 375)    | 6 (3, 8)       | 52 (41, 63)        | 1 (1, 2)    | 59 (46, 71)       | 0.6 (0.2, 0.7) | 8.1 (6.4, 9.7)    | 0.3 (0.2, 0.5) | 2.9 (2.3, 3.5)    |
| Uganda              | Men   | Ages 20 to 44     | 2.24  | 1.5 (0.5, 2.6) | 22 (19, 25) | 11 (6, 17)       | 133 (97, 167)  | 1 (1, 2)    | 145 (108, 181)    | 3 (2, 5)       | 118 (77, 246)      | 0 (0, 0)    | 40 (30, 50)       | 1.8 (1.0, 2.8) | 25.5 (18.7, 32.1) | 0.7 (0.3, 1.0) | 13.4 (10.0, 16.7) |
| Uganda              | Men   | Ages 45 to 64     | 1.24  | 0.7 (0.2, 1.3) | 23 (20, 26) | 13 (7, 19)       | 146 (95, 192)  | 3 (1, 5)    | 162 (108, 209)    | 10 (5, 16)     | 118 (77, 155)      | 2 (1, 4)    | 131 (88, 169)     | 0.8 (0.4, 1.2) | 12.2 (7.9, 15.9)  | 0.6 (0.3, 1.0) | 5.4 (3.6, 7.0)    |
| Uganda              | Men   | Ages 65 and older | 1.74  | 0.6 (0.2, 0.9) | 22 (19, 26) | 13 (7, 20)       | 132 (90, 174)  | 3 (1, 4)    | 148 (104, 193)    | 35 (18, 53)    | 349 (237, 460)     | 7 (3, 10)   | 391 (275, 509)    | 0.4 (0.2, 0.5) | 6.5 (4.4, 8.6)    | 0.4 (0.2, 0.7) | 2.5 (1.8, 3.3)    |
| Uganda              | Men   | Overall           | 5.22  | 1.0 (0.3, 1.7) | 22 (19, 25) | 37 (19, 56)      | 411 (341, 486) | 7 (3, 10)   | 455 (375, 538)    | 7 (4, 11)      | 79 (65, 93)        | 1 (1, 2)    | 87 (72, 103)      | 0.6 (0.3, 0.9) | 11.0 (9.1, 12.9)  | 0.5 (0.3, 0.8) | 4.6 (3.8, 5.4)    |
| Uganda              | Both  | Overall           | 10.5  | 0.9 (0.3, 1.6) | 22 (20, 25) | 67 (34, 100)     | 687 (592, 784) | 12 (6, 18)  | 766 (652, 880)    | 6 (3, 9)       | 65 (56, 74)        | 1 (1, 2)    | 73 (62, 84)       | 0.5 (0.3, 0.8) | 9.6 (8.3, 10.9)   | 0.4 (0.2, 0.6) | 3.7 (3.2, 4.3)    |
| Ukraine             | Women | Ages 20 to 44     | 3.53  | 0.5 (0.2, 0.9) | 25 (24, 27) | 11 (6, 15)       | 28 (21, 36)    | 2 (1, 2)    | 40 (31, 50)       | 2 (1, 2)       | 4 (3, 5)           | 0 (0, 0)    | 6 (5, 7)          | 1.7 (1.0, 2.4) | 14.2 (10.6, 18.1) | 0.3 (0.2, 0.5) | 3.0 (2.3, 3.7)    |
| Ukraine             | Women | Ages 45 to 64     | 6.84  | 0.3 (0.1, 0.4) | 28 (25, 31) | 143 (85, 203)    | 75 (49, 99)    | 18 (11, 26) | 236 (157, 311)    | 21 (12, 30)    | 11 (7, 14)         | 3 (2, 4)    | 34 (23, 45)       | 0.9 (0.5, 1.3) | 7.2 (4.8, 9.6)    | 0.3 (0.2, 0.4) | 0.9 (0.6, 1.2)    |
| Ukraine             | Women | Ages 65 and older | 7.99  | 0.2 (0.1, 0.3) | 27 (22, 31) | 846 (452, 1284)  | 74 (50, 99)    | 30 (17, 43) | 950 (541, 1396)   | 178 (95, 270)  | 16 (10, 21)        | 6 (4, 9)    | 199 (114, 293)    | 0.4 (0.2, 0.5) | 4.4 (2.9, 5.8)    | 0.2 (0.1, 0.3) | 0.4 (0.2, 0.5)    |
| Ukraine             | Women | Overall           | 18.4  | 0.3 (0.1, 0.6) | 26 (23, 29) | 1000 (557, 1488) | 177 (139, 213) | 49 (29, 70) | 1226 (746, 1740)  | 54 (30, 81)    | 10 (8, 12)         | 3 (2, 4)    | 67 (41, 95)       | 0.4 (0.2, 0.6) | 6.1 (4.8, 7.3)    | 0.2 (0.1, 0.3) | 0.4 (0.3, 0.6)    |
| Ukraine             | Men   | Ages 20 to 44     | 3.58  | 0.6 (0.2, 1.0) | 25 (22, 28) | 64 (38, 91)      | 44 (31, 56)    | 2 (1, 3)    | 110 (79, 144)     | 10 (6, 14)     | 7 (5, 8)           | 0 (0, 0)    | 17 (12, 22)       | 1.7 (1.0, 2.5) | 14.5 (10.3, 18.7) | 0.3 (0.2, 0.5) | 2.3 (1.7, 3.1)    |
| Ukraine             | Men   | Ages 45 to 64     | 5.46  | 0.3 (0.1, 0.5) | 26 (23, 29) | 361 (218, 506)   | 73 (50, 97)    | 22 (13, 32) | 457 (300, 624)    | 66 (40, 93)    | 13 (9, 18)         | 4 (2, 6)    | 84 (55, 114)      | 1.0 (0.6, 1.3) | 7.7 (5.3, 10.2)   | 0.3 (0.2, 0.5) | 1.0 (0.6, 1.3)    |
| Ukraine             | Men   | Ages 65 and older | 5.41  | 0.2 (0.1, 0.4) | 25 (22, 29) | 520 (332, 720)   | 36 (25, 48)    | 23 (14, 32) | 579 (379, 792)    |                |                    |             |                   |                |                   |                |                   |

|                                    |       |                   |        |                |             |                    |                     |                |                     |               |                 |             |                  |                |                   |                |                   |
|------------------------------------|-------|-------------------|--------|----------------|-------------|--------------------|---------------------|----------------|---------------------|---------------|-----------------|-------------|------------------|----------------|-------------------|----------------|-------------------|
| United Republic of Tanzania        | Women | Ages 20 to 44     | 3.18   | 0.6 (0.2, 0.9) | 23 (22, 24) | 3 (1, 5)           | 58 (42, 74)         | 1 (0, 1)       | 61 (45, 77)         | 1 (0, 1)      | 11 (8, 14)      | 0 (0, 0)    | 12 (9, 15)       | 1.0 (0.4, 1.6) | 13.2 (9.5, 16.8)  | 0.2 (0.1, 0.3) | 7.2 (5.3, 9.1)    |
| United Republic of Tanzania        | Women | Ages 45 to 64     | 2.21   | 0.3 (0.1, 0.4) | 23 (22, 25) | 6 (3, 10)          | 108 (68, 147)       | 2 (1, 3)       | 117 (75, 155)       | 3 (1, 5)      | 49 (31, 67)     | 1 (0, 1)    | 53 (34, 70)      | 0.5 (0.2, 0.8) | 6.6 (4.1, 8.9)    | 0.2 (0.1, 0.3) | 3.3 (2.1, 4.4)    |
| United Republic of Tanzania        | Women | Ages 65 and older | 2.68   | 0.2 (0.1, 0.3) | 23 (21, 24) | 15 (8, 22)         | 181 (120, 243)      | 2 (1, 3)       | 198 (136, 263)      | 19 (10, 29)   | 233 (155, 312)  | 3 (1, 4)    | 255 (175, 338)   | 0.2 (0.1, 0.4) | 3.8 (2.5, 5.0)    | 0.2 (0.1, 0.3) | 1.9 (1.3, 2.6)    |
| United Republic of Tanzania        | Women | Overall           | 8.07   | 0.3 (0.1, 0.6) | 23 (22, 24) | 24 (12, 36)        | 347 (277, 422)      | 4 (2, 7)       | 376 (301, 453)      | 3 (1, 5)      | 43 (34, 52)     | 1 (0, 1)    | 47 (37, 56)      | 0.3 (0.2, 0.5) | 5.0 (4.0, 6.1)    | 0.2 (0.1, 0.3) | 2.6 (2.1, 3.1)    |
| United Republic of Tanzania        | Men   | Ages 20 to 44     | 3.21   | 0.6 (0.2, 1.1) | 22 (21, 24) | 5 (3, 8)           | 114 (80, 147)       | 1 (0, 1)       | 120 (86, 153)       | 1 (1, 2)      | 22 (15, 28)     | 0 (0, 0)    | 23 (17, 29)      | 0.9 (0.3, 0.5) | 14.2 (10.0, 18.2) | 0.4 (0.2, 0.6) | 9.9 (7.1, 12.6)   |
| United Republic of Tanzania        | Men   | Ages 45 to 64     | 2.02   | 0.3 (0.1, 0.5) | 23 (21, 25) | 7 (3, 10)          | 107 (69, 145)       | 2 (1, 3)       | 115 (78, 154)       | 3 (2, 5)      | 53 (34, 72)     | 1 (0, 1)    | 57 (39, 77)      | 0.4 (0.2, 0.7) | 7.1 (4.6, 9.6)    | 0.3 (0.2, 0.5) | 3.7 (2.5, 5.0)    |
| United Republic of Tanzania        | Men   | Ages 65 and older | 2.63   | 0.2 (0.1, 0.4) | 23 (21, 25) | 8 (4, 13)          | 120 (78, 160)       | 2 (1, 3)       | 130 (89, 171)       | 13 (7, 20)    | 191 (124, 254)  | 3 (2, 5)    | 207 (141, 272)   | 0.2 (0.1, 0.3) | 3.9 (2.5, 5.2)    | 0.3 (0.2, 0.4) | 2.0 (1.3, 2.6)    |
| United Republic of Tanzania        | Men   | Overall           | 7.85   | 0.4 (0.1, 0.7) | 23 (21, 24) | 20 (10, 30)        | 341 (278, 403)      | 4 (2, 6)       | 366 (300, 433)      | 3 (1, 4)      | 43 (35, 51)     | 1 (0, 1)    | 47 (38, 55)      | 0.3 (0.2, 0.5) | 6.3 (5.2, 7.5)    | 0.3 (0.2, 0.5) | 3.4 (2.8, 4.0)    |
| United Republic of Tanzania        | Both  | Overall           | 15.9   | 0.4 (0.1, 0.6) | 23 (21, 24) | 44 (22, 66)        | 688 (593, 788)      | 9 (4, 13)      | 741 (637, 847)      | 3 (1, 4)      | 43 (37, 49)     | 1 (0, 1)    | 47 (40, 53)      | 0.3 (0.2, 0.5) | 5.6 (4.8, 6.4)    | 0.2 (0.1, 0.4) | 2.9 (2.5, 3.3)    |
| United States of America           | Women | Ages 20 to 44     | 20.2   | 2.0 (1.5, 2.4) | 27 (27, 28) | 130 (75, 194)      | 668 (481, 826)      | 38 (21, 55)    | 836 (632, 1029)     | 3 (2, 5)      | 17 (12, 20)     | 1 (1, 1)    | 21 (16, 25)      | 4.7 (2.7, 7.0) | 31.2 (22.5, 38.6) | 0.9 (0.5, 1.4) | 9.6 (7.3, 11.8)   |
| United States of America           | Women | Ages 45 to 64     | 41.2   | 1.0 (0.7, 1.2) | 30 (29, 31) | 621 (373, 902)     | 2517 (1823, 3267)   | 05 (121, 295)  | 3343 (2492, 4176)   | 15 (9, 22)    | 61 (44, 79)     | 5 (3, 7)    | 81 (60, 101)     | 2.2 (1.3, 3.2) | 15.9 (11.5, 20.6) | 0.6 (0.4, 0.9) | 4.4 (3.3, 5.5)    |
| United States of America           | Women | Ages 65 and older | 43.3   | 0.7 (0.5, 0.9) | 28 (28, 29) | 2378 (1254, 392)   | 4401 (3251, 5546)   | 99 (239, 573)  | 7178 (5348, 9293)   | 104 (55, 171) | 192 (142, 241)  | 17 (10, 25) | 313 (233, 405)   | 0.7 (0.3, 1.1) | 6.2 (4.6, 7.8)    | 0.5 (0.3, 0.7) | 1.4 (1.0, 1.8)    |
| United States of America           | Women | Overall           | 105    | 1.2 (1.0, 1.5) | 28 (28, 29) | 3129 (1801, 492)   | 7586 (6235, 8980)   | 42 (384, 9121) | 13577 (8850, 15960) | 30 (17, 47)   | 72 (60, 86)     | 6 (4, 9)    | 108 (85, 133)    | 0.8 (0.5, 1.3) | 8.5 (7.0, 10.1)   | 0.5 (0.3, 0.8) | 1.9 (1.5, 2.3)    |
| United States of America           | Men   | Ages 20 to 44     | 29.1   | 2.2 (1.7, 2.7) | 28 (27, 28) | 366 (208, 540)     | 1075 (811, 1326)    | 32 (19, 46)    | 1473 (1119, 1795)   | 9 (5, 13)     | 26 (19, 32)     | 1 (0, 1)    | 35 (27, 43)      | 5.1 (2.9, 7.6) | 33.6 (25.3, 41.4) | 0.9 (0.5, 1.4) | 12.5 (9.5, 15.3)  |
| United States of America           | Men   | Ages 45 to 64     | 39.0   | 1.1 (0.8, 1.3) | 30 (29, 30) | 1630 (985, 2331)   | 3835 (2693, 4912)   | 58 (154, 372)  | 5723 (4346, 7142)   | 41 (25, 59)   | 97 (68, 125)    | 7 (4, 9)    | 145 (110, 181)   | 2.4 (1.4, 3.4) | 17.3 (12.1, 22.2) | 0.8 (0.4, 1.4) | 9.9 (7.1, 12.6)   |
| United States of America           | Men   | Ages 65 and older | 37.7   | 0.8 (0.6, 0.9) | 28 (27, 29) | 2204 (1231, 335)   | 4196 (3064, 5342)   | 95 (235, 564)  | 6795 (5079, 8622)   | 128 (71, 195) | 244 (178, 310)  | 23 (14, 33) | 395 (295, 501)   | 0.8 (0.3, 1.3) | 7.3 (5.4, 9.3)    | 0.5 (0.3, 0.7) | 1.8 (1.3, 2.3)    |
| United States of America           | Men   | Overall           | 98.3   | 1.4 (1.1, 1.7) | 28 (28, 29) | 4200 (2455, 603)   | 9106 (7508, 10729)  | 84 (413, 960)  | 3990 (11074, 17014) | 43 (25, 61)   | 93 (76, 109)    | 7 (4, 10)   | 142 (113, 173)   | 1.2 (0.7, 1.8) | 11.0 (9.1, 13.0)  | 0.6 (0.4, 0.8) | 2.8 (2.2, 3.4)    |
| United States of America           | Both  | Overall           | 203    | 1.3 (1.0, 1.6) | 28 (28, 29) | 7330 (4384, 10761) | 6691 (14516, 18981) | 26 (798, 1825) | 347 (20453, 30225)  | 36 (22, 53)   | 82 (72, 93)     | 7 (4, 9)    | 125 (101, 149)   | 1.0 (0.6, 1.5) | 9.7 (8.4, 11.0)   | 0.6 (0.3, 0.8) | 2.3 (1.8, 2.7)    |
| Uruguay                            | Women | Ages 20 to 44     | 0.235  | 0.8 (0.2, 1.4) | 25 (23, 27) | 0 (0, 1)           | 2 (1, 2)            | 0 (0, 1)       | 3 (2, 3)            | 1 (1, 1)      | 4 (3, 5)        | 1 (0, 1)    | 6 (4, 7)         | 2.2 (1.3, 3.2) | 17.2 (12.5, 21.9) | 0.6 (0.3, 0.8) | 2.5 (2.0, 3.2)    |
| Uruguay                            | Women | Ages 45 to 64     | 0.382  | 0.4 (0.1, 0.7) | 29 (27, 30) | 3 (2, 4)           | 9 (6, 12)           | 2 (1, 3)       | 13 (9, 17)          | 7 (4, 10)     | 24 (16, 32)     | 5 (3, 7)    | 35 (25, 45)      | 1.2 (0.7, 1.7) | 8.6 (5.7, 11.7)   | 0.4 (0.2, 0.6) | 1.7 (1.2, 2.2)    |
| Uruguay                            | Women | Ages 65 and older | 0.501  | 0.3 (0.1, 0.5) | 28 (25, 31) | 14 (8, 22)         | 29 (22, 37)         | 5 (3, 8)       | 49 (37, 62)         | 51 (28, 79)   | 105 (77, 131)   | 18 (11, 27) | 174 (130, 219)   | 0.4 (0.2, 0.6) | 3.7 (2.7, 4.6)    | 0.4 (0.2, 0.5) | 0.8 (0.6, 1.0)    |
| Uruguay                            | Women | Overall           | 1.12   | 0.5 (0.1, 0.9) | 27 (25, 29) | 17 (10, 26)        | 40 (32, 48)         | 7 (4, 11)      | 65 (50, 80)         | 16 (9, 23)    | 36 (28, 43)     | 7 (4, 9)    | 58 (44, 72)      | 0.4 (0.2, 0.6) | 4.4 (3.5, 5.3)    | 0.4 (0.2, 0.5) | 0.9 (0.7, 1.1)    |
| Uruguay                            | Men   | Ages 20 to 44     | 0.237  | 0.9 (0.3, 1.5) | 26 (24, 27) | 1 (1, 1)           | 2 (2, 3)            | 0 (0, 0)       | 3 (3, 4)            | 2 (1, 3)      | 5 (4, 6)        | 0 (0, 1)    | 7 (6, 9)         | 2.3 (1.4, 3.3) | 18.2 (13.6, 23.2) | 0.4 (0.3, 0.7) | 4.0 (3.0, 5.0)    |
| Uruguay                            | Men   | Ages 45 to 64     | 0.345  | 0.4 (0.1, 0.7) | 28 (26, 29) | 8 (5, 11)          | 13 (9, 17)          | 2 (1, 3)       | 23 (16, 29)         | 22 (13, 31)   | 38 (25, 51)     | 6 (3, 8)    | 66 (47, 85)      | 1.2 (0.7, 1.7) | 9.1 (6.0, 12.1)   | 0.5 (0.3, 0.7) | 2.0 (1.4, 2.6)    |
| Uruguay                            | Men   | Ages 65 and older | 0.395  | 0.3 (0.1, 0.5) | 27 (25, 29) | 16 (9, 23)         | 17 (20, 35)         | 5 (3, 6)       | 48 (36, 61)         | 87 (51, 127)  | 151 (108, 195)  | 25 (15, 36) | 263 (197, 336)   | 0.5 (0.3, 0.7) | 4.5 (3.2, 5.8)    | 0.3 (0.2, 0.5) | 1.0 (0.7, 1.2)    |
| Uruguay                            | Men   | Overall           | 0.976  | 0.6 (0.2, 0.9) | 26 (25, 28) | 24 (15, 35)        | 43 (34, 52)         | 7 (4, 9)       | 74 (57, 91)         | 25 (15, 36)   | 44 (35, 53)     | 7 (4, 10)   | 76 (58, 93)      | 0.6 (0.4, 0.9) | 5.5 (4.4, 6.7)    | 0.4 (0.2, 0.5) | 1.2 (0.9, 1.5)    |
| Uruguay                            | Both  | Overall           | 2.09   | 0.5 (0.2, 0.9) | 27 (25, 29) | 42 (25, 61)        | 83 (70, 95)         | 14 (8, 20)     | 139 (109, 169)      | 20 (12, 29)   | 40 (34, 45)     | 7 (4, 10)   | 66 (52, 81)      | 0.5 (0.3, 0.8) | 4.9 (4.2, 5.6)    | 0.4 (0.2, 0.5) | 1.0 (0.8, 1.3)    |
| Uzbekistan                         | Women | Ages 20 to 44     | 2.25   | 0.1 (0.0, 0.2) | 24 (23, 25) | 7 (5, 10)          | 26 (19, 34)         | 1 (1, 2)       | 35 (27, 43)         | 2 (1, 3)      | 7 (5, 8)        | 0 (0, 0)    | 9 (7, 11)        | 0.7 (0.5, 1.0) | 7.1 (5.1, 9.0)    | 0.2 (0.1, 0.3) | 1.8 (1.4, 2.3)    |
| Uzbekistan                         | Women | Ages 45 to 64     | 2.17   | 0.1 (0.0, 0.1) | 27 (25, 29) | 33 (20, 47)        | 75 (50, 99)         | 4 (2, 5)       | 111 (81, 142)       | 15 (9, 22)    | 34 (23, 46)     | 1 (1, 2)    | 51 (37, 65)      | 0.6 (0.4, 0.9) | 4.9 (3.3, 6.6)    | 0.3 (0.2, 0.4) | 1.4 (1.0, 1.8)    |
| Uzbekistan                         | Women | Ages 65 and older | 2.4    | 0.0 (0.0, 0.1) | 27 (23, 31) | 84 (50, 125)       | 44 (30, 60)         | 3 (2, 4)       | 131 (91, 177)       | 122 (73, 183) | 65 (44, 88)     | 4 (3, 6)    | 192 (134, 260)   | 0.3 (0.2, 0.4) | 3.0 (2.1, 4.1)    | 0.3 (0.2, 0.5) | 0.4 (0.3, 0.5)    |
| Uzbekistan                         | Women | Overall           | 6.81   | 0.1 (0.0, 0.1) | 26 (24, 28) | 124 (75, 180)      | 145 (118, 176)      | 8 (5, 11)      | 277 (212, 346)      | 18 (11, 26)   | 21 (17, 26)     | 1 (1, 2)    | 41 (31, 51)      | 0.3 (0.2, 0.5) | 4.3 (3.5, 5.2)    | 0.3 (0.2, 0.4) | 0.6 (0.5, 0.8)    |
| Uzbekistan                         | Men   | Ages 20 to 44     | 2.25   | 0.1 (0.0, 0.2) | 24 (23, 26) | 17 (11, 24)        | 31 (23, 40)         | 1 (0, 1)       | 49 (38, 62)         | 4 (3, 6)      | 8 (6, 10)       | 0 (0, 0)    | 13 (10, 16)      | 0.8 (0.5, 1.1) | 7.2 (5.2, 9.2)    | 0.2 (0.1, 0.3) | 1.7 (1.3, 2.1)    |
| Uzbekistan                         | Men   | Ages 45 to 64     | 1.99   | 0.1 (0.0, 0.1) | 27 (25, 28) | 67 (41, 95)        | 91 (62, 118)        | 3 (2, 4)       | 162 (119, 204)      | 34 (20, 47)   | 46 (31, 59)     | 2 (1, 2)    | 81 (60, 102)     | 0.6 (0.4, 0.9) | 4.9 (3.4, 6.4)    | 0.4 (0.2, 0.6) | 1.2 (0.9, 1.5)    |
| Uzbekistan                         | Men   | Ages 65 and older | 2.17   | 0.0 (0.0, 0.1) | 26 (24, 28) | 81 (48, 116)       | 37 (24, 49)         | 3 (2, 5)       | 121 (83, 161)       | 158 (93, 226) | 71 (47, 97)     | 6 (4, 9)    | 236 (162, 315)   | 0.3 (0.2, 0.5) | 3.2 (2.1, 4.4)    | 0.5 (0.3, 0.7) | 0.4 (0.3, 0.6)    |
| Uzbekistan                         | Men   | Overall           | 6.41   | 0.1 (0.0, 0.1) | 26 (24, 27) | 165 (101, 233)     | 159 (127, 191)      | 7 (4, 10)      | 332 (251, 414)      | 26 (16, 36)   | 25 (20, 30)     | 1 (1, 1)    | 52 (39, 64)      | 0.4 (0.3, 0.6) | 4.7 (3.7, 5.6)    | 0.4 (0.2, 0.6) | 0.7 (0.6, 0.9)    |
| Uzbekistan                         | Both  | Overall           | 13.2   | 0.1 (0.0, 0.1) | 26 (24, 28) | 289 (177, 409)     | 305 (262, 349)      | 14 (9, 20)     | 608 (469, 753)      | 22 (13, 31)   | 23 (20, 26)     | 1 (1, 2)    | 46 (35, 57)      | 0.4 (0.2, 0.5) | 4.5 (3.9, 5.2)    | 0.3 (0.2, 0.5) | 0.7 (0.5, 0.8)    |
| Vanuatu                            | Women | Ages 20 to 44     | 0.0178 | 1.2 (0.4, 2.1) | 27 (26, 29) | 0 (0, 0)           | 3 (2, 4)            | 0 (0, 0)       | 3 (2, 4)            | 8 (5, 11)     | 89 (63, 114)    | 1 (1, 2)    | 98 (71, 124)     | 3.3 (2.0, 4.7) | 21.4 (15.0, 27.5) | 0.7 (0.4, 1.1) | 14.9 (10.8, 18.9) |
| Vanuatu                            | Women | Ages 45 to 64     | 0.0148 | 0.6 (0.2, 1.0) | 30 (29, 32) | 0 (0, 1)           | 7 (5, 9)            | 0 (0, 0)       | 8 (5, 10)           | 29 (18, 41)   | 479 (337, 628)  | 4 (2, 6)    | 512 (366, 662)   | 1.6 (1.0, 2.2) | 11.5 (8.1, 15.1)  | 0.5 (0.3, 0.7) | 9.8 (7.0, 12.7)   |
| Vanuatu                            | Women | Ages 65 and older | 0.0172 | 0.4 (0.1, 0.7) | 28 (25, 32) | 0 (0, 1)           | 4 (3, 5)            | 0 (0, 0)       | 4 (3, 6)            | 98 (57, 138)  | 984 (642, 1338) | 10 (6, 15)  | 1093 (732, 1457) | 0.7 (0.4, 1.0) | 6.6 (4.3, 9.0)    | 0.5 (0.3, 0.7) | 4.4 (2.9, 5.8)    |
| Vanuatu                            | Women | Overall           | 0.0498 | 0.8 (0.2, 1.3) | 28 (26, 31) | 1 (1, 2)           | 14 (11, 17)         | 0 (0, 0)       | 15 (12, 18)         | 22 (13, 30)   | 278 (222, 335)  | 3 (2, 4)    | 302 (244, 362)   | 1.2 (0.7, 1.7) | 10.3 (8.2, 12.4)  | 0.5 (0.3, 0.8) | 7.6 (6.1, 9.1)    |
| Vanuatu                            | Men   | Ages 20 to 44     | 0.0185 | 1.3 (0.3, 2.2) | 26 (25, 27) | 1 (0, 1)           | 2 (2, 3)            | 0 (0, 0)       | 3 (2, 4)            | 22 (13, 31)   | 77 (55, 100)    | 0 (0, 1)    | 100 (72, 124)    | 3.3 (2.0, 4.5) | 22.2 (15.8, 28.7) | 0.6 (0.3, 0.8) | 10.3 (7.5, 12.9)  |
| Vanuatu                            | Men   | Ages 45 to 64     | 0.0149 | 0.6 (0.2, 1.1) | 28 (27, 29) | 1 (1, 2)           | 7 (5, 10)           | 0 (0, 0)       | 8 (6, 11)           | 78 (48, 111)  | 487 (336, 638)  | 3 (2, 4)    | 569 (408, 726)   | 1.6 (1.0, 2.2) | 12.1 (8.4, 15.9)  | 0.7 (0.4, 1.0) | 7.1 (5.1, 9.1)    |
| Vanuatu                            | Men   | Ages 65 and older | 0.0167 | 0.5 (0.1, 0.8) | 27 (25, 29) | 0 (0, 1)           | 4 (2, 5)            | 0 (0, 0)       | 4 (3, 6)            | 118 (71, 167) | 888 (577, 1230) | 11 (6, 16)  | 1017 (682, 1359) | 0.7 (0.4, 1.0) | 7.0 (4.5, 9.6)    | 0.6 (0.3, 0.9) | 3.8 (2.5, 5.1)    |
| Vanuatu                            | Men   | Overall           | 0.0501 | 0.8 (0.2, 1.4) | 27 (25, 28) | 2 (1, 3)           | 13 (11, 16)         | 0 (0, 0)       | 16 (13, 19)         | 47 (28, 66)   | 268 (212, 321)  | 2 (1, 3)    | 316 (251, 376)   | 1.4 (0.9, 2.0) | 10.8 (8.5, 12.9)  | 0.6 (0.4, 0.9) | 6.1 (4.8, 7.2)    |
| Vanuatu                            | Both  | Overall           | 0.1    | 0.8 (0.2, 1.3) | 28 (26, 30) | 3 (2, 5)           | 27 (23, 31)         | 0 (0, 0)       | 31 (26, 36)         | 34 (21, 48)   | 273 (234, 312)  | 2 (1, 3)    | 309 (261, 356)   | 1.4 (0.8, 1.9) | 10.5 (9.0, 12.0)  | 0.6 (0.3, 0.8) | 6.7 (5.7, 7.7)    |
| Venezuela (Bolivarian Republic of) | Women | Ages 20 to 44     | 2.33   | 1.2 (0.4, 2.1) | 27 (26, 29) | 9 (6, 14)          | 38 (28, 47)         | 2 (1, 3)       | 50 (38, 61)         | 2 (1, 3)      | 9 (7, 11)       | 0 (0, 1)    | 12 (9, 15)       | 3.4 (2.0, 5.0) | 23.7 (17.5, 29.5) | 0.8 (0.4, 1.1) | 7.2 (5.5, 8.8)    |
| Venezuela (Bolivarian Republic of) | Women | Ages 45 to 64     | 2.53   | 0.7 (0.2, 1.1) | 30 (28, 32) | 37 (22, 53)        | 189 (132, 245)      | 8 (5, 11)      | 234 (170, 296)      | 15 (9, 21)    | 75 (52, 97)     | 3 (2, 5)    | 92 (67, 117)     | 1.7 (1.0, 2.5) | 12.0 (8.4, 15.1)  | 0.6 (0.3, 0.8) | 4.8 (3.5, 6.1)    |
| Venezuela (Bolivarian Republic of) | Women | Ages 65 and older | 2.75   | 0.5 (0.1, 0.8) | 27 (25, 29) | 79 (47, 115)       | 264 (197, 339)      | 9 (5, 14)      | 353 (269, 442)      | 90 (53, 131)  | 301 (225, 386)  | 10 (6, 16)  | 402 (307, 503)   | 0.7 (0.4, 1.0) | 5.5 (4.1, 7.1)    | 0.5 (0.3, 0.7) | 2.0 (1.6, 2.6)    |
| Venezuela (Bolivarian Republic of) | Women | Overall           | 7.6    | 0.8 (0.2, 1.3) | 28 (26, 30) | 125 (75, 177)      | 492 (396, 587)      | 19 (11, 28)    | 636 (513, 761)      | 16 (10, 23)   | 65 (52, 77)     | 2 (1, 4)    | 84 (67, 100)     | 0.9 (0.5, 1.3) | 7.5 (6.1, 9.0)    | 0.5 (0.3, 0.8) | 2.8 (2.2, 3.3)    |
| Venezuela (Bolivarian Republic of) | Men   | Ages 20 to 44     | 2.     |                |             |                    |                     |                |                     |               |                 |             |                  |                |                   |                |                   |

|           |       |                   |       |                |             |               |                |           |                |              |                |           |                |                |                   |                |                 |
|-----------|-------|-------------------|-------|----------------|-------------|---------------|----------------|-----------|----------------|--------------|----------------|-----------|----------------|----------------|-------------------|----------------|-----------------|
| Yemen     | Men   | Overall           | 3.97  | 0.3 (0.1, 0.5) | 24 (21, 27) | 49 (34, 66)   | 99 (80, 119)   | 1 (1, 2)  | 150 (123, 178) | 12 (9, 17)   | 25 (20, 30)    | 0 (0, 0)  | 38 (31, 45)    | 0.6 (0.4, 0.8) | 5.4 (4.4, 6.5)    | 0.2 (0.1, 0.3) | 1.4 (1.1, 1.6)  |
| Yemen     | Both  | Overall           | 8.09  | 0.3 (0.1, 0.5) | 25 (22, 29) | 108 (69, 147) | 240 (206, 276) | 4 (3, 6)  | 352 (295, 415) | 13 (9, 18)   | 30 (26, 34)    | 1 (0, 1)  | 44 (37, 51)    | 0.6 (0.4, 0.8) | 5.4 (4.6, 6.2)    | 0.3 (0.2, 0.4) | 1.5 (1.3, 1.8)  |
| <b>27</b> |       |                   |       |                |             |               |                |           |                |              |                |           |                |                |                   |                |                 |
| Zambia    | Women | Ages 20 to 44     | 0.922 | 0.3 (0.1, 0.6) | 23 (22, 24) | 1 (0, 2)      | 16 (11, 20)    | 0 (0, 0)  | 17 (12, 22)    | 1 (0, 1)     | 11 (8, 14)     | 0 (0, 0)  | 12 (9, 15)     | 0.7 (0.3, 1.1) | 10.1 (7.2, 13.2)  | 0.2 (0.1, 0.3) | 4.5 (3.3, 5.8)  |
| Zambia    | Women | Ages 45 to 64     | 0.56  | 0.2 (0.0, 0.3) | 24 (23, 25) | 3 (1, 5)      | 41 (26, 57)    | 1 (0, 1)  | 45 (30, 60)    | 5 (3, 9)     | 74 (47, 101)   | 1 (1, 2)  | 80 (53, 108)   | 0.4 (0.2, 0.6) | 5.5 (3.5, 7.5)    | 0.2 (0.1, 0.3) | 2.7 (1.8, 3.6)  |
| Zambia    | Women | Ages 65 and older | 0.727 | 0.1 (0.0, 0.2) | 22 (20, 24) | 5 (3, 8)      | 50 (31, 69)    | 0 (0, 1)  | 56 (36, 75)    | 24 (12, 37)  | 226 (141, 312) | 2 (1, 4)  | 253 (164, 342) | 0.2 (0.1, 0.3) | 3.0 (1.9, 4.2)    | 0.2 (0.1, 0.2) | 1.2 (0.8, 1.6)  |
| Zambia    | Women | Overall           | 2.21  | 0.2 (0.1, 0.4) | 23 (21, 24) | 9 (5, 14)     | 107 (83, 132)  | 1 (1, 2)  | 117 (93, 145)  | 4 (2, 6)     | 48 (37, 60)    | 1 (0, 1)  | 53 (42, 66)    | 0.2 (0.1, 0.3) | 4.2 (3.2, 5.2)    | 0.2 (0.1, 0.3) | 1.7 (1.4, 2.1)  |
| Zambia    | Men   | Ages 20 to 44     | 0.947 | 0.4 (0.1, 0.7) | 20 (19, 22) | 1 (0, 1)      | 7 (3, 10)      | 0 (0, 0)  | 8 (4, 11)      | 0 (0, 1)     | 5 (2, 7)       | 0 (0, 0)  | 5 (3, 7)       | 0.3 (0.2, 0.5) | 5.0 (2.5, 7.3)    | 0.2 (0.1, 0.3) | 2.3 (1.3, 3.2)  |
| Zambia    | Men   | Ages 45 to 64     | 0.507 | 0.2 (0.0, 0.3) | 21 (20, 23) | 3 (2, 5)      | 29 (19, 39)    | 1 (0, 1)  | 33 (22, 43)    | 7 (3, 10)    | 57 (37, 77)    | 1 (1, 2)  | 65 (44, 85)    | 0.4 (0.2, 0.5) | 5.8 (3.8, 7.8)    | 0.3 (0.1, 0.4) | 2.1 (1.5, 2.8)  |
| Zambia    | Men   | Ages 65 and older | 0.747 | 0.1 (0.0, 0.2) | 20 (19, 22) | 3 (1, 4)      | 21 (12, 30)    | 0 (0, 1)  | 24 (15, 34)    | 16 (8, 25)   | 117 (67, 168)  | 2 (1, 4)  | 136 (84, 189)  | 0.1 (0.1, 0.2) | 2.4 (1.4, 3.5)    | 0.2 (0.1, 0.3) | 0.7 (0.5, 1.0)  |
| Zambia    | Men   | Overall           | 2.2   | 0.2 (0.1, 0.4) | 21 (19, 22) | 7 (4, 10)     | 57 (42, 72)    | 1 (1, 2)  | 65 (49, 80)    | 3 (2, 5)     | 26 (19, 33)    | 0 (0, 1)  | 29 (22, 36)    | 0.2 (0.1, 0.3) | 3.8 (2.8, 4.8)    | 0.2 (0.1, 0.3) | 1.3 (1.0, 1.6)  |
| Zambia    | Both  | Overall           | 4.41  | 0.2 (0.1, 0.4) | 22 (20, 23) | 16 (8, 24)    | 164 (135, 193) | 2 (1, 4)  | 182 (151, 213) | 4 (2, 6)     | 37 (31, 44)    | 1 (0, 1)  | 41 (34, 48)    | 0.2 (0.1, 0.3) | 4.0 (3.3, 4.8)    | 0.2 (0.1, 0.3) | 1.5 (1.3, 1.8)  |
| Zimbabwe  | Women | Ages 20 to 44     | 1.04  | 0.9 (0.2, 1.5) | 24 (23, 25) | 7 (4, 12)     | 52 (38, 65)    | 0 (0, 0)  | 59 (45, 73)    | 5 (3, 8)     | 36 (27, 46)    | 0 (0, 0)  | 41 (31, 51)    | 2.0 (1.1, 3.4) | 19.1 (14.1, 24.0) | 0.4 (0.3, 0.6) | 9.9 (7.5, 12.2) |
| Zimbabwe  | Women | Ages 45 to 64     | 0.644 | 0.4 (0.1, 0.7) | 26 (24, 27) | 16 (8, 24)    | 84 (56, 113)   | 2 (1, 2)  | 101 (71, 132)  | 24 (13, 37)  | 130 (87, 175)  | 3 (2, 4)  | 156 (111, 205) | 1.5 (0.8, 2.3) | 9.0 (6.1, 12.1)   | 0.5 (0.3, 0.8) | 5.0 (3.5, 6.5)  |
| Zimbabwe  | Women | Ages 65 and older | 0.682 | 0.3 (0.1, 0.5) | 25 (23, 27) | 25 (17, 34)   | 99 (66, 132)   | 2 (2, 3)  | 126 (89, 161)  | 84 (56, 116) | 334 (222, 447) | 8 (5, 11) | 426 (301, 542) | 0.5 (0.3, 0.7) | 5.0 (3.3, 6.7)    | 0.3 (0.2, 0.4) | 1.7 (1.2, 2.2)  |
| Zimbabwe  | Women | Overall           | 2.37  | 0.5 (0.2, 0.9) | 25 (23, 26) | 48 (31, 66)   | 234 (187, 280) | 4 (3, 6)  | 286 (231, 339) | 20 (13, 28)  | 99 (79, 118)   | 2 (1, 2)  | 121 (98, 143)  | 0.7 (0.5, 1.0) | 7.4 (5.9, 8.8)    | 0.4 (0.2, 0.5) | 2.9 (2.3, 3.4)  |
| Zimbabwe  | Men   | Ages 20 to 44     | 1.04  | 0.9 (0.3, 1.6) | 22 (21, 23) | 4 (2, 7)      | 24 (16, 31)    | 0 (0, 0)  | 28 (20, 36)    | 2 (1, 4)     | 16 (11, 21)    | 0 (0, 0)  | 19 (13, 24)    | 1.2 (0.5, 2.2) | 14.8 (9.9, 19.3)  | 0.5 (0.2, 0.8) | 6.1 (4.4, 8.0)  |
| Zimbabwe  | Men   | Ages 45 to 64     | 0.487 | 0.4 (0.1, 0.7) | 23 (21, 24) | 6 (3, 10)     | 43 (28, 57)    | 1 (0, 2)  | 50 (34, 65)    | 13 (6, 20)   | 87 (58, 118)   | 2 (1, 3)  | 102 (70, 134)  | 0.7 (0.3, 1.0) | 8.7 (5.7, 11.7)   | 0.4 (0.2, 0.7) | 3.2 (2.2, 4.2)  |
| Zimbabwe  | Men   | Ages 65 and older | 0.68  | 0.3 (0.1, 0.6) | 22 (21, 23) | 10 (5, 15)    | 49 (33, 65)    | 2 (1, 3)  | 61 (44, 78)    | 43 (21, 65)  | 209 (140, 279) | 8 (4, 13) | 260 (188, 335) | 0.3 (0.2, 0.5) | 4.8 (3.2, 6.4)    | 0.3 (0.2, 0.5) | 1.3 (1.0, 1.7)  |
| Zimbabwe  | Men   | Overall           | 2.2   | 0.6 (0.2, 1.0) | 22 (21, 23) | 20 (10, 30)   | 115 (92, 137)  | 3 (2, 5)  | 138 (110, 164) | 9 (4, 14)    | 52 (42, 62)    | 1 (1, 2)  | 63 (50, 74)    | 0.5 (0.2, 0.7) | 6.9 (5.5, 8.2)    | 0.4 (0.2, 0.5) | 2.1 (1.7, 2.5)  |
| Zimbabwe  | Both  | Overall           | 4.57  | 0.6 (0.2, 1.0) | 23 (22, 25) | 68 (46, 91)   | 349 (298, 401) | 7 (5, 10) | 424 (362, 488) | 15 (10, 20)  | 76 (65, 88)    | 2 (1, 2)  | 93 (79, 107)   | 0.6 (0.4, 0.8) | 7.2 (6.1, 8.3)    | 0.4 (0.2, 0.5) | 2.6 (2.2, 2.9)  |

Supplemental Table 3. DALYs Attributable to SSB Consumption in 2010, by Country, Age, and Sex.

|                           | Population characteristics |                                |                               |                      | Number of DALYs attributable to SSBs (95% UI) |                      |                              |                       |                     |                       |                      | DALYs per million adults attributable to SSBs (95% UI) |                     |                  |                       |                      |                              |                    |                |
|---------------------------|----------------------------|--------------------------------|-------------------------------|----------------------|-----------------------------------------------|----------------------|------------------------------|-----------------------|---------------------|-----------------------|----------------------|--------------------------------------------------------|---------------------|------------------|-----------------------|----------------------|------------------------------|--------------------|----------------|
|                           | Population                 | Mean SSB Intake (servings/day) | Mean BMI (kg/m <sup>2</sup> ) | CVD <sup>a</sup>     | Diabetes <sup>b</sup>                         | Cancers <sup>c</sup> | Musculoskeletal <sup>d</sup> | Total <sup>e</sup>    | CVD <sup>f</sup>    | Diabetes <sup>g</sup> | Cancers <sup>h</sup> | Musculoskeletal <sup>i</sup>                           | Total <sup>j</sup>  | CVD <sup>k</sup> | Diabetes <sup>l</sup> | Cancers <sup>m</sup> | Musculoskeletal <sup>n</sup> | Total <sup>o</sup> |                |
| <b>Alghanistan</b>        |                            |                                |                               |                      |                                               |                      |                              |                       |                     |                       |                      |                                                        |                     |                  |                       |                      |                              |                    |                |
| <b>Women</b>              |                            |                                |                               |                      |                                               |                      |                              |                       |                     |                       |                      |                                                        |                     |                  |                       |                      |                              |                    |                |
| Ages 20 to 44             | 4670000                    | 0.4 (0.2, 0.7)                 | 20.9 (17.1, 24.7)             | 9193 (658, 32772)    | 2784 (825, 7027)                              | 548 (31, 2088)       | 276 (19, 1028)               | 12801 (2278, 38709)   | 1970 (141, 7022)    | 597 (177, 1506)       | 117 (7, 447)         | 59 (4, 220)                                            | 2743 (488, 8294)    | 3.4 (0.3, 11.1)  | 2.8 (0.9, 6.0)        | 0.5 (0.0, 1.7)       | 0.4 (0.0, 1.6)               | 0.7 (0.1, 2.0)     |                |
| Ages 45 to 64             | 1380000                    | 0.2 (0.1, 0.4)                 | 21.6 (17.7, 25.4)             | 14142 (950, 48582)   | 3531 (1133, 8099)                             | 718 (43, 2771)       | 1084 (57, 2711)              | 19475 (2876, 59189)   | 10237 (688, 55166)  | 2556 (830, 5862)      | 530 (31, 2066)       | 785 (41, 3111)                                         | 14097 (2082, 42844) | 3.0 (0.2, 10.0)  | 3.5 (1.3, 7.2)        | 0.6 (0.0, 2.3)       | 1.6 (0.1, 5.9)               | 1.5 (0.2, 4.4)     |                |
| Ages 65 and older         | 3610000                    | 0.2 (0.1, 0.3)                 | 20.8 (15.4, 26.3)             | 6329 (281, 23041)    | 1525 (509, 3488)                              | 232 (9, 919)         | 307 (10, 1280)               | 8393 (1110, 26703)    | 17548 (1479, 63890) | 4228 (1412, 9671)     | 644 (24, 2548)       | 852 (27, 3549)                                         | 23273 (3077, 74061) | 1.8 (0.4, 6.5)   | 3.0 (1.1, 6.2)        | 0.6 (0.0, 2.4)       | 1.0 (0.0, 5.6)               | 1.2 (0.2, 3.8)     |                |
| <b>Women overall</b>      | 6410000                    | 0.3 (0.1, 0.5)                 | 21.0 (16.6, 25.5)             | 29664 (1889, 104395) | 7840 (2468, 18614)                            | 1498 (83, 5778)      | 1668 (85, 6605)              | 40670 (6264, 124608)  | 46278 (295, 16288)  | 1223 (385, 2904)      | 234 (13, 901)        | 260 (13, 1031)                                         | 6345 (977, 19442)   | 2.7 (0.2, 9.2)   | 3.1 (1.1, 6.5)        | 0.5 (0.0, 2.1)       | 1.1 (0.0, 4.4)               | 1.1 (0.2, 3.4)     |                |
| <b>Men</b>                |                            |                                |                               |                      |                                               |                      |                              |                       |                     |                       |                      |                                                        |                     |                  |                       |                      |                              |                    |                |
| Ages 20 to 44             | 5090000                    | 0.5 (0.2, 0.8)                 | 20.5 (17.3, 23.1)             | 4951 (487, 13349)    | 2105 (610, 5323)                              | 718 (13, 480)        | 212 (17, 622)                | 7415 (1685, 16884)    | 973 (96, 2624)      | 212 (138, 2904)       | 28 (3, 94)           | 4 (2, 14)                                              | 1458 (331, 3319)    | 4.1 (0.4, 10.2)  | 4.1 (1.4, 8.9)        | 0.3 (0.0, 0.8)       | 0.3 (0.0, 1.1)               | 0.5 (0.1, 1.1)     |                |
| Ages 45 to 64             | 1480000                    | 0.2 (0.1, 0.4)                 | 20.8 (18.0, 23.7)             | 14141 (1032, 39155)  | 2852 (896, 6462)                              | 355 (22, 1159)       | 809 (49, 2482)               | 18157 (2672, 45323)   | 9568 (698, 26492)   | 1929 (656, 4372)      | 540 (15, 784)        | 547 (33, 1679)                                         | 12285 (1808, 30664) | 3.5 (0.3, 9.0)   | 3.6 (1.4, 7.2)        | 0.3 (0.0, 1.0)       | 1.3 (0.1, 4.4)               | 1.4 (0.2, 3.4)     |                |
| Ages 65 and older         | 3420000                    | 0.2 (0.1, 0.3)                 | 20.2 (16.8, 23.6)             | 5140 (335, 14536)    | 1169 (363, 2548)                              | 1169 (363, 2548)     | 200 (9, 681)                 | 6634 (985, 17013)     | 15024 (978, 42489)  | 3471 (1062, 7446)     | 364 (19, 1160)       | 586 (27, 1992)                                         | 19391 (2880, 49727) | 2.1 (0.1, 5.8)   | 2.8 (1.0, 5.5)        | 0.3 (0.0, 0.8)       | 1.1 (0.0, 4.0)               | 1.1 (0.2, 2.9)     |                |
| <b>Men overall</b>        | 6910000                    | 0.3 (0.1, 0.5)                 | 20.5 (17.5, 23.5)             | 24232 (1854, 67041)  | 6125 (1869, 14333)                            | 625 (42, 2037)       | 1222 (75, 3795)              | 52206 (5342, 79220)   | 3508 (268, 9706)    | 887 (271, 2075)       | 91 (6, 295)          | 117 (11, 549)                                          | 4663 (773, 11469)   | 3.2 (0.3, 8.3)   | 3.5 (1.3, 7.2)        | 0.3 (0.0, 0.9)       | 0.9 (0.1, 3.2)               | 1.0 (0.2, 2.5)     |                |
| <b>Both sexes overall</b> | 13300000                   | 0.3 (0.1, 0.5)                 | 20.8 (17.1, 24.5)             | 53896 (3743, 171436) | 13965 (4337, 32947)                           | 2125 (125, 7814)     | 2889 (161, 10400)            | 72876 (11606, 203828) | 4047 (281, 12874)   | 1049 (326, 2474)      | 160 (9, 587)         | 277 (12, 781)                                          | 5472 (871, 15306)   | 3.0 (0.2, 8.8)   | 3.3 (1.2, 6.8)        | 0.4 (0.0, 1.5)       | 1.0 (0.0, 3.8)               | 1.1 (0.2, 2.9)     |                |
| <b>Albania</b>            |                            |                                |                               |                      |                                               |                      |                              |                       |                     |                       |                      |                                                        |                     |                  |                       |                      |                              |                    |                |
| <b>Women</b>              |                            |                                |                               |                      |                                               |                      |                              |                       |                     |                       |                      |                                                        |                     |                  |                       |                      |                              |                    |                |
| Ages 20 to 44             | 614000                     | 0.4 (0.1, 0.6)                 | 24.2 (21.9, 26.4)             | 27 (8, 171)          | 56 (15, 154)                                  | 7 (1, 28)            | 4 (1, 9)                     | 94 (38, 322)          | 44 (14, 279)        | 91 (24, 251)          | 11 (2, 46)           | 6 (2, 15)                                              | 152 (61, 524)       | 0.7 (0.2, 5.7)   | 1.0 (0.3, 2.6)        | 0.1 (0.0, 0.5)       | 0.0 (0.0, 0.1)               | 0.1 (0.0, 0.4)     |                |
| Ages 45 to 64             | 334000                     | 0.2 (0.1, 0.3)                 | 27.4 (24.8, 30.1)             | 33 (6, 66)           | 87 (25, 222)                                  | 7 (1, 17)            | 17 (1, 17)                   | 140 (54, 281)         | 26 (7, 146)         | 260 (74, 666)         | 22 (4, 50)           | 41 (6, 94)                                             | 420 (161, 842)      | 0.2 (0.0, 0.4)   | 1.3 (0.5, 3.0)        | 0.0 (0.0, 0.1)       | 0.0 (0.0, 0.2)               | 0.1 (0.0, 0.3)     |                |
| Ages 65 and older         | 165000                     | 0.1 (0.0, 0.2)                 | 27.3 (24.6, 30.0)             | 33 (8, 82)           | 77 (26, 185)                                  | 2 (1, 6)             | 5 (1, 14)                    | 201 (48, 499)         | 466 (156, 1123)     | 14 (3, 37)            | 29 (5, 87)           | 710 (286, 1381)                                        | 0.1 (0.0, 0.1)      | 1.3 (0.5, 2.9)   | 0.0 (0.0, 0.0)        | 0.0 (0.0, 0.1)       | 0.0 (0.0, 0.1)               | 0.1 (0.0, 0.2)     |                |
| <b>Women overall</b>      | 1110000                    | 0.2 (0.1, 0.4)                 | 26.2 (23.8, 28.7)             | 93 (23, 319)         | 220 (65, 561)                                 | 17 (3, 51)           | 22 (4, 55)                   | 351 (138, 831)        | 93 (31, 287)        | 199 (59, 505)         | 15 (3, 46)           | 20 (3, 49)                                             | 315 (124, 746)      | 0.3 (0.1, 2.1)   | 1.2 (0.4, 2.8)        | 0.1 (0.0, 0.2)       | 0.0 (0.0, 0.1)               | 0.1 (0.0, 0.3)     |                |
| <b>Men</b>                |                            |                                |                               |                      |                                               |                      |                              |                       |                     |                       |                      |                                                        |                     |                  |                       |                      |                              |                    |                |
| Ages 20 to 44             | 592000                     | 0.4 (0.1, 0.7)                 | 25.8 (24.0, 27.5)             | 40 (18, 75)          | 63 (16, 167)                                  | 2 (1, 4)             | 2 (1, 5)                     | 107 (49, 216)         | 60 (38, 126)        | 107 (27, 282)         | 3 (1, 7)             | 4 (1, 8)                                               | 181 (83, 365)       | 0.6 (0.3, 1.0)   | 2.1 (0.6, 4.9)        | 0.0 (0.0, 0.1)       | 0.0 (0.0, 0.1)               | 0.1 (0.0, 0.2)     |                |
| Ages 45 to 64             | 342000                     | 0.2 (0.1, 0.3)                 | 27.6 (25.6, 29.5)             | 84 (19, 168)         | 106 (30, 261)                                 | 4 (1, 10)            | 9 (2, 20)                    | 203 (85, 388)         | 245 (56, 490)       | 310 (89, 764)         | 13 (2, 29)           | 26 (5, 59)                                             | 593 (250, 1314)     | 0.2 (0.0, 0.4)   | 1.4 (0.5, 3.1)        | 0.0 (0.0, 0.0)       | 0.0 (0.0, 0.1)               | 0.1 (0.0, 0.1)     |                |
| Ages 65 and older         | 145000                     | 0.1 (0.0, 0.2)                 | 26.5 (24.5, 28.5)             | 49 (12, 115)         | 73 (22, 175)                                  | 2 (0, 6)             | 3 (1, 7)                     | 127 (49, 254)         | 337 (83, 798)       | 507 (154, 1207)       | 14 (3, 38)           | 18 (4, 49)                                             | 877 (336, 1760)     | 0.1 (0.0, 0.2)   | 0.9 (0.3, 2.1)        | 0.0 (0.0, 0.0)       | 0.0 (0.0, 0.1)               | 0.1 (0.0, 0.2)     |                |
| <b>Men overall</b>        | 1080000                    | 0.3 (0.1, 0.5)                 | 26.5 (24.6, 28.4)             | 173 (49, 358)        | 242 (69, 603)                                 | 8 (2, 20)            | 14 (3, 32)                   | 437 (183, 858)        | 160 (45, 332)       | 255 (64, 559)         | 8 (2, 18)            | 13 (3, 30)                                             | 405 (170, 796)      | 0.3 (0.1, 0.5)   | 1.5 (0.5, 3.3)        | 0.0 (0.0, 0.0)       | 0.0 (0.0, 0.1)               | 0.1 (0.0, 0.2)     |                |
| <b>Both sexes overall</b> | 2190000                    | 0.2 (0.1, 0.4)                 | 26.3 (24.1, 28.5)             | 265 (71, 677)        | 462 (134, 1165)                               | 25 (5, 71)           | 36 (7, 87)                   | 788 (322, 1689)       | 1233 (331, 309)     | 211 (61, 531)         | 11 (2, 32)           | 16 (3, 40)                                             | 359 (147, 771)      | 0.3 (0.1, 1.3)   | 1.3 (0.4, 3.1)        | 0.0 (0.0, 0.1)       | 0.0 (0.0, 0.1)               | 0.1 (0.0, 0.3)     |                |
| <b>Algeria</b>            |                            |                                |                               |                      |                                               |                      |                              |                       |                     |                       |                      |                                                        |                     |                  |                       |                      |                              |                    |                |
| <b>Women</b>              |                            |                                |                               |                      |                                               |                      |                              |                       |                     |                       |                      |                                                        |                     |                  |                       |                      |                              |                    |                |
| Ages 20 to 44             | 7570000                    | 0.5 (0.1, 0.9)                 | 25.5 (24.1, 26.9)             | 910 (404, 1713)      | 4122 (1504, 8686)                             | 90 (36, 198)         | 114 (40, 249)                | 5236 (2483, 9985)     | 120 (53, 226)       | 544 (199, 1147)       | 12 (5, 26)           | 15 (5, 33)                                             | 691 (328, 1318)     | 1.3 (0.6, 2.3)   | 3.7 (1.4, 7.8)        | 0.2 (0.1, 0.3)       | 0.1 (0.0, 0.2)               | 0.5 (0.2, 0.9)     |                |
| Ages 45 to 64             | 2660000                    | 0.3 (0.1, 0.5)                 | 28.6 (26.1, 29.9)             | 932 (444, 1667)      | 5006 (1870, 10672)                            | 94 (40, 193)         | 324 (118, 702)               | 6356 (3092, 12051)    | 351 (167, 627)      | 1884 (704, 4016)      | 35 (15, 73)          | 122 (44, 264)                                          | 2396 (1164, 4535)   | 0.5 (0.3, 0.9)   | 4.6 (1.7, 9.4)        | 0.1 (0.0, 0.2)       | 0.2 (0.1, 0.5)               | 0.7 (0.3, 1.3)     |                |
| Ages 65 and older         | 9010000                    | 0.2 (0.1, 0.3)                 | 25.2 (22.1, 28.6)             | 1415 (345, 5983)     | 3747 (1410, 8054)                             | 57 (13, 218)         | 186 (36, 833)                | 5404 (2189, 14696)    | 1570 (382, 6637)    | 4156 (1554, 9913)     | 63 (15, 241)         | 206 (39, 924)                                          | 5995 (2432, 16303)  | 0.5 (0.1, 2.1)   | 4.0 (1.5, 8.4)        | 0.2 (0.0, 0.8)       | 0.4 (0.1, 2.0)               | 0.8 (0.3, 2.1)     |                |
| <b>Women overall</b>      | 11100000                   | 0.3 (0.1, 0.6)                 | 26.1 (23.8, 28.7)             | 3258 (1193, 9363)    | 12874 (4875, 27932)                           | 240 (89, 629)        | 604 (194, 1784)              | 16596 (7768, 36732)   | 259 (107, 841)      | 3186 (1490, 2461)     | 22 (8, 55)           | 556 (17, 160)                                          | 1577 (698, 3307)    | 0.8 (0.3, 1.8)   | 4.1 (1.6, 8.6)        | 0.1 (0.0, 0.5)       | 0.2 (0.1, 0.9)               | 0.7 (0.3, 1.4)     |                |
| <b>Men</b>                |                            |                                |                               |                      |                                               |                      |                              |                       |                     |                       |                      |                                                        |                     |                  |                       |                      |                              |                    |                |
| Ages 20 to 44             | 7790000                    | 0.5 (0.2, 0.9)                 | 24.0 (22.8, 25.2)             | 1252 (579, 2239)     | 5474 (1858, 11383)                            | 43 (16, 91)          | 75 (26, 161)                 | 6844 (3021, 13063)    | 161 (74, 287)       | 702 (238, 1461)       | 5 (2, 12)            | 10 (3, 21)                                             | 878 (388, 1676)     | 1.4 (0.7, 2.4)   | 6.8 (2.5, 13.6)       | 0.1 (0.0, 0.2)       | 0.1 (0.0, 0.2)               | 0.6 (0.3, 1.2)     |                |
| Ages 45 to 64             | 2650000                    | 0.3 (0.1, 0.5)                 | 25.6 (24.2, 27.0)             | 1139 (602, 1962)     | 5337 (1910, 10667)                            | 36 (16, 68)          | 207 (75, 439)                | 6720 (3208, 12029)    | 400 (227, 741)      | 2015 (721, 4027)      | 14 (6, 26)           | 78 (28, 166)                                           | 2537 (1211, 4542)   | 0.6 (0.3, 1.0)   | 4.6 (1.8, 9.0)        | 0.0 (0.0, 0.1)       | 0.2 (0.1, 0.4)               | 0.7 (0.4, 1.3)     |                |
| Ages 65 and older         | 722000                     | 0.2 (0.1, 0.3)                 | 24.8 (22.4, 26.8)             | 815 (146, 3417)      | 3252 (118, 6642)                              | 19 (7, 77)           | 54 (10, 297)                 | 4161 (165, 9733)      | 1121 (476, 4698)    | 4485 (1531, 9132)     | 27 (10, 106)         | 31 (11, 80)                                            | 5720 (2530, 13381)  | 0.4 (0.2, 1.8)   | 3.6 (1.4, 7.2)        | 0.0 (0.0, 0.2)       | 0.2 (0.1, 1.1)               | 0.5 (0.3, 1.7)     |                |
| <b>Men overall</b>        | 11200000                   | 0.3 (0.1, 0.6)                 | 24.7 (23.1, 27.0)             | 3207 (1527, 7638)    | 14073 (4897, 28692)                           | 98 (39, 236)         | 347 (120, 837)               | 17725 (8055, 34826)   | 287 (137, 648)      | 1260 (428, 2568)      | 9 (4, 21)            | 31 (11, 80)                                            | 1587 (721, 3114)    | 0.8 (0.4, 1.7)   | 5.0 (1.9, 9.9)        | 0.1 (0.0, 0.2)       | 0.1 (0.0, 0.6)               | 0.7 (0.3, 1.4)     |                |
| <b>Both sexes overall</b> | 22300000                   | 0.3 (0.1, 0.6)                 | 25.4 (23.5, 27.3)             | 6465 (2720, 16981)   | 26947 (9681, 56084)                           | 338 (129, 844)       | 971 (314, 2681)              | 34721 (15823, 71559)  | 290 (122, 761)      | 1208 (434, 2515)      | 16 (3, 38)           | 44 (14, 120)                                           | 1557 (709, 3209)    | 0.8 (0.4, 1.8)   | 4.6 (1.7, 9.2)        | 0.1 (0.0, 0.3)       | 0.2 (0.0, 0.7)               | 0.7 (0.3, 1.4)     |                |
| <b>Andorra</b>            |                            |                                |                               |                      |                                               |                      |                              |                       |                     |                       |                      |                                                        |                     |                  |                       |                      |                              |                    |                |
| <b>Women</b>              |                            |                                |                               |                      |                                               |                      |                              |                       |                     |                       |                      |                                                        |                     |                  |                       |                      |                              |                    |                |
| Ages 20 to 44             | 14000                      | 0.7 (0.2, 1.3)                 | 25.4 (21.7, 29.1)             | 0 (0, 1)             | 3 (1, 8)                                      | 0 (0, 0)             | 0 (0, 0)                     | 0 (0, 0)              | 4 (1, 10)           | 29 (11, 106)          | 208 (48, 598)        | 7 (3, 19)                                              | 9 (3, 20)           | 254 (82, 693)    | 1.7 (0.7, 8.5)        | 2.2 (0.6, 5.5)       | 0.1 (0.0, 0.5)               | 0.0 (0.0, 0.1)     | 0.2 (0.1, 0.5) |
| Ages 45 to 64             | 11200                      | 0.3 (0.1, 0.5)                 | 27.6 (24.4, 31.5)             | 1 (0, 1)             | 5 (1, 15)                                     | 0 (0, 0)             | 1 (0, 1)                     | 1 (0, 1)              | 7 (3, 17)           | 78 (34, 132)          | 467 (118, 1303)      | 38 (17, 66)                                            | 52 (18, 105)        | 635 (256, 1513)  | 0.5 (0.3, 0.9)        | 3.0 (1.0, 6.7)       | 0.0 (0.0, 0.2)               | 0.1 (0.0, 0.2)     | 0.3 (0.1, 0.6) |
| Ages 65 and older         | 8640                       | 0.2 (0.1, 0.4)                 | 26.4 (20.9, 31.8)             | 14 (2, 110)          | 12 (4, 29)                                    | 2 (0, 14)            | 1 (0, 8)                     | 29 (8, 162)           | 1604 (235, 12722)   | 1400 (414, 3346)      | 224 (40, 1651)       | 125 (18, 913)                                          | 3353 (975, 18731)   | 0.5 (0.1, 3.4)   | 3.2 (1.1, 7.0)        | 0.2 (0.0, 1.3)       | 0.2 (0.0, 1.2)               | 0.4 (0.1, 1.9)     |                |
| <b>Women overall</b>      | 33800                      | 0.5 (0.1, 0.8)                 | 26.4 (22.1, 30.7)             | 15 (3, 113)          | 20 (6, 52)                                    | 2 (1, 15)            | 40 (12, 189)                 | 448 (76, 3338)        | 599 (165, 1534)     | 73 (17, 415)          | 53 (12, 276)         | 1172 (368, 5573)                                       | 0.9 (0.4, 4.2)      | 2.8 (0.9, 6.4)   | 0.1 (0.0, 0.7)        | 0.1 (0.0, 0.5)       | 0.3 (0.1, 1.0)               |                    |                |
| <b>Men</b>                |                            |                                |                               |                      |                                               |                      |                              |                       |                     |                       |                      |                                                        |                     |                  |                       |                      |                              |                    |                |
| Ages 20 to 44             | 14400                      | 0.9 (0.3, 1.5)                 | 26.4 (24.4, 29.2)             | 1 (0, 2)             | 4 (1, 12)                                     | 0 (0, 0)             | 0 (0, 0)                     | 0 (0, 0)              | 7 (3, 13)           | 312 (88, 842)         | 6 (3, 13)            | 6 (3, 13)                                              | 395 (157, 920)      | 1.5 (0.8, 2.7)   | 5.1 (1.4, 11.5)       | 0.1 (0.0, 0.2)       | 0.0 (0.0, 0.1)               | 0.3 (0.1, 0.7)     |                |
| Ages 45 to 64             | 11000                      | 0.3 (0.1, 0.6)                 | 28.9 (26.3, 31.5)             | 3 (1, 5)             | 8 (3, 21)                                     | 0 (0, 1)             | 0 (0, 1)                     | 12 (6, 25)            | 246 (119, 446)      | 763 (235, 3912)       | 45 (20, 83)          | 32 (11, 67)                                            | 1086 (500, 2268)    | 0.6 (0.3, 1.0)   | 2.6 (0.8, 6.0)        | 0.0 (0.0, 0.2)       | 0.1 (0.0,                    |                    |                |

|                           |          |                |                   |                   |                    |                 |                |                     |                  |                  |               |              |                    |                |                 |                |                |                |
|---------------------------|----------|----------------|-------------------|-------------------|--------------------|-----------------|----------------|---------------------|------------------|------------------|---------------|--------------|--------------------|----------------|-----------------|----------------|----------------|----------------|
| Women overall             | 1230000  | 0.2 (0.0, 0.3) | 27.7 (25.6, 29.8) | 224 (61, 371)     | 964 (293, 2245)    | 38 (13, 74)     | 49 (14, 106)   | 1274 (554, 2551)    | 181 (50, 300)    | 781 (237, 1819)  | 30 (11, 60)   | 39 (11, 86)  | 1032 (440, 2067)   | 0.5 (0.2, 0.8) | 2.6 (0.9, 5.5)  | 0.1 (0.0, 0.2) | 0.1 (0.0, 0.2) | 0.3 (0.2, 0.7) |
| <b>Men</b>                |          |                |                   |                   |                    |                 |                |                     |                  |                  |               |              |                    |                |                 |                |                |                |
| Ages 20 to 44             | 515000   | 0.3 (0.1, 0.5) | 24.7 (23.8, 25.6) | 116 (59, 214)     | 221 (66, 569)      | 4 (1, 8)        | 3 (1, 6)       | 343 (166, 700)      | 226 (114, 416)   | 429 (129, 1106)  | 7 (2, 15)     | 5 (2, 12)    | 667 (324, 1361)    | 1.0 (0.5, 1.8) | 4.8 (1.7, 10.3) | 0.1 (0.0, 0.1) | 0.1 (0.0, 0.1) | 0.3 (0.2, 0.7) |
| Ages 45 to 64             | 323000   | 0.1 (0.0, 0.2) | 26.6 (25.8, 27.6) | 129 (111, 406)    | 414 (139, 1204)    | 8 (3, 17)       | 15 (5, 34)     | 666 (338, 1204)     | 709 (341, 3164)  | 1279 (413, 3164) | 26 (9, 53)    | 45 (16, 104) | 2060 (1046, 3925)  | 0.4 (0.2, 0.7) | 3.1 (1.2, 6.3)  | 0.1 (0.0, 0.1) | 0.1 (0.0, 0.3) | 0.4 (0.2, 0.7) |
| Ages 65 and older         | 131000   | 0.1 (0.0, 0.2) | 25.5 (24.3, 26.7) | 171 (36, 1161)    | 272 (90, 641)      | 7 (1, 33)       | 7 (1, 43)      | 457 (199, 1699)     | 1305 (276, 8854) | 2075 (686, 4885) | 51 (11, 251)  | 51 (9, 326)  | 3481 (1519, 12954) | 0.2 (0.1, 0.4) | 2.1 (0.8, 4.4)  | 0.0 (0.0, 0.2) | 0.1 (0.0, 0.7) | 0.3 (0.1, 1.1) |
| Men overall               | 969000   | 0.2 (0.1, 0.3) | 25.6 (24.1, 27.9) | 517 (206, 1283)   | 907 (295, 2233)    | 18 (6, 58)      | 24 (7, 82)     | 1466 (704, 3663)    | 2306 (305, 2304) | 906 (305, 2304)  | 19 (6, 20)    | 25 (10, 65)  | 1512 (726, 3785)   | 0.5 (0.3, 1.3) | 3.3 (1.2, 7.0)  | 0.1 (0.0, 0.1) | 0.1 (0.0, 0.4) | 0.3 (0.2, 0.8) |
| <b>Both sexes overall</b> | 2200000  | 0.2 (0.1, 0.3) | 26.6 (24.8, 28.4) | 740 (267, 2152)   | 1871 (588, 4478)   | 56 (19, 132)    | 73 (21, 188)   | 2740 (1248, 6220)   | 336 (121, 977)   | 849 (267, 2032)  | 25 (8, 60)    | 33 (9, 85)   | 1244 (566, 2823)   | 0.5 (0.2, 1.1) | 3.0 (1.1, 6.3)  | 0.1 (0.0, 0.2) | 0.1 (0.0, 0.3) | 0.3 (0.2, 0.8) |
| <b>Australia</b>          |          |                |                   |                   |                    |                 |                |                     |                  |                  |               |              |                    |                |                 |                |                |                |
| <b>Women</b>              |          |                |                   |                   |                    |                 |                |                     |                  |                  |               |              |                    |                |                 |                |                |                |
| Ages 20 to 44             | 3700000  | 0.5 (0.1, 0.9) | 25.6 (24.9, 26.3) | 156 (96, 233)     | 494 (188, 1044)    | 46 (29, 70)     | 35 (16, 66)    | 730 (412, 1302)     | 42 (26, 63)      | 133 (51, 282)    | 13 (8, 19)    | 9 (4, 18)    | 197 (111, 352)     | 1.4 (1.0, 1.9) | 1.7 (0.6, 3.6)  | 0.1 (0.1, 0.2) | 0.0 (0.0, 0.1) | 0.2 (0.1, 0.3) |
| Ages 45 to 64             | 2790000  | 0.2 (0.1, 0.4) | 28.8 (27.0, 29.7) | 284 (195, 407)    | 1019 (388, 2209)   | 160 (109, 228)  | 164 (76, 307)  | 1628 (949, 2825)    | 102 (70, 146)    | 365 (139, 792)   | 57 (39, 82)   | 59 (27, 110) | 584 (340, 1013)    | 0.6 (0.4, 0.8) | 2.5 (0.9, 5.1)  | 0.1 (0.1, 0.2) | 0.1 (0.0, 0.2) | 0.2 (0.1, 0.4) |
| Ages 65 and older         | 1640000  | 0.2 (0.1, 0.3) | 27.9 (27.0, 28.7) | 583 (433, 772)    | 1262 (491, 2663)   | 135 (90, 190)   | 87 (42, 159)   | 2067 (1251, 3440)   | 357 (265, 472)   | 772 (300, 1628)  | 82 (55, 116)  | 54 (26, 98)  | 1264 (765, 2104)   | 0.3 (0.2, 0.4) | 2.1 (0.8, 4.4)  | 0.1 (0.1, 0.1) | 0.1 (0.0, 0.1) | 0.2 (0.1, 0.4) |
| Women overall             | 8130000  | 0.3 (0.1, 0.5) | 27.2 (26.4, 28.4) | 1023 (724, 1413)  | 2775 (1066, 5916)  | 341 (228, 528)  | 286 (134, 533) | 4426 (2612, 7567)   | 126 (89, 174)    | 341 (131, 728)   | 42 (28, 60)   | 35 (16, 66)  | 544 (321, 931)     | 0.8 (0.5, 1.0) | 2.1 (0.8, 4.3)  | 0.1 (0.1, 0.2) | 0.1 (0.0, 0.1) | 0.2 (0.1, 0.4) |
| <b>Men</b>                |          |                |                   |                   |                    |                 |                |                     |                  |                  |               |              |                    |                |                 |                |                |                |
| Ages 20 to 44             | 3750000  | 0.5 (0.1, 0.9) | 26.7 (26.4, 27.3) | 368 (240, 540)    | 642 (235, 1535)    | 33 (18, 53)     | 23 (11, 43)    | 865 (516, 1355)     | 96 (64, 144)     | 171 (63, 361)    | 9 (5, 14)     | 6 (3, 11)    | 284 (165, 481)     | 1.7 (1.2, 2.3) | 3.6 (1.3, 7.5)  | 0.1 (0.1, 0.2) | 0.0 (0.0, 0.1) | 0.2 (0.1, 0.3) |
| Ages 45 to 64             | 2740000  | 0.3 (0.1, 0.4) | 28.9 (28.1, 29.6) | 775 (557, 1046)   | 1452 (544, 3034)   | 176 (111, 255)  | 106 (50, 202)  | 2509 (1526, 4153)   | 283 (203, 381)   | 529 (198, 1107)  | 64 (41, 93)   | 39 (18, 73)  | 915 (557, 1515)    | 0.7 (0.5, 0.9) | 2.3 (0.8, 4.9)  | 0.1 (0.1, 0.1) | 0.1 (0.0, 0.2) | 0.3 (0.2, 0.5) |
| Ages 65 and older         | 1380000  | 0.2 (0.1, 0.3) | 27.8 (27.1, 28.5) | 747 (555, 983)    | 1517 (567, 3138)   | 159 (102, 230)  | 49 (23, 93)    | 2472 (1505, 4115)   | 543 (403, 714)   | 1102 (412, 2278) | 115 (74, 167) | 35 (17, 67)  | 1795 (1093, 2988)  | 0.3 (0.2, 0.4) | 1.7 (0.6, 3.4)  | 0.1 (0.1, 0.1) | 0.1 (0.0, 0.1) | 0.3 (0.2, 0.4) |
| Men overall               | 7870000  | 0.3 (0.1, 0.5) | 27.7 (27.0, 28.3) | 1891 (1352, 2569) | 3610 (1345, 7527)  | 367 (232, 538)  | 177 (84, 337)  | 6046 (3649, 10073)  | 240 (172, 326)   | 459 (171, 956)   | 47 (29, 68)   | 23 (11, 43)  | 768 (464, 1280)    | 0.9 (0.6, 1.2) | 2.5 (0.9, 5.2)  | 0.1 (0.1, 0.1) | 0.1 (0.0, 0.1) | 0.3 (0.2, 0.4) |
| <b>Both sexes overall</b> | 16000000 | 0.3 (0.1, 0.5) | 27.4 (26.7, 28.2) | 2914 (2076, 3981) | 6385 (2412, 13444) | 709 (459, 1026) | 464 (218, 870) | 10472 (6261, 17641) | 182 (130, 249)   | 399 (151, 840)   | 44 (29, 64)   | 29 (14, 54)  | 655 (391, 1103)    | 0.8 (0.6, 1.1) | 2.3 (0.8, 4.8)  | 0.1 (0.1, 0.1) | 0.1 (0.0, 0.1) | 0.2 (0.1, 0.4) |
| <b>Austria</b>            |          |                |                   |                   |                    |                 |                |                     |                  |                  |               |              |                    |                |                 |                |                |                |
| <b>Women</b>              |          |                |                   |                   |                    |                 |                |                     |                  |                  |               |              |                    |                |                 |                |                |                |
| Ages 20 to 44             | 1430000  | 0.6 (0.5, 0.8) | 23.1 (20.7, 25.6) | 113 (34, 339)     | 328 (85, 883)      | 18 (7, 44)      | 16 (5, 38)     | 475 (167, 1161)     | 79 (24, 237)     | 229 (59, 618)    | 13 (5, 31)    | 11 (4, 27)   | 333 (117, 812)     | 3.0 (0.8, 9.4) | 2.3 (0.7, 5.3)  | 0.2 (0.1, 0.7) | 0.0 (0.0, 0.1) | 0.3 (0.1, 0.6) |
| Ages 45 to 64             | 1140000  | 0.3 (0.2, 0.3) | 27.3 (24.3, 30.4) | 127 (70, 200)     | 609 (187, 1535)    | 50 (28, 78)     | 38 (22, 121)   | 844 (386, 1571)     | 111 (61, 173)    | 533 (163, 1343)  | 44 (24, 68)   | 78 (38, 106) | 738 (338, 1560)    | 0.5 (0.3, 0.8) | 2.9 (1.1, 5.9)  | 0.1 (0.0, 0.1) | 0.1 (0.0, 0.2) | 0.3 (0.1, 0.6) |
| Ages 65 and older         | 870000   | 0.2 (0.2, 0.3) | 27.6 (25.5, 31.8) | 561 (226, 4123)   | 1188 (436, 2906)   | 85 (66, 475)    | 57 (17, 333)   | 1891 (863, 7351)    | 645 (260, 4739)  | 1365 (501, 2984) | 98 (41, 545)  | 66 (20, 383) | 2174 (992, 8450)   | 0.3 (0.2, 0.3) | 2.4 (0.9, 4.5)  | 0.1 (0.0, 0.1) | 0.1 (0.0, 0.4) | 0.4 (0.2, 1.1) |
| Women overall             | 3440000  | 0.4 (0.3, 0.5) | 25.9 (22.6, 29.1) | 801 (330, 4662)   | 2124 (707, 5014)   | 154 (71, 597)   | 132 (44, 493)  | 3211 (1416, 10296)  | 233 (96, 1354)   | 617 (205, 1456)  | 45 (21, 173)  | 38 (13, 143) | 933 (411, 2991)    | 1.3 (0.4, 3.8) | 2.8 (1.0, 5.7)  | 0.1 (0.1, 0.4) | 0.1 (0.0, 0.2) | 0.3 (0.1, 0.8) |
| <b>Men</b>                |          |                |                   |                   |                    |                 |                |                     |                  |                  |               |              |                    |                |                 |                |                |                |
| Ages 20 to 44             | 1450000  | 0.7 (0.6, 0.9) | 25.5 (23.7, 27.2) | 127 (72, 201)     | 500 (145, 1211)    | 9 (4, 17)       | 9 (3, 19)      | 646 (282, 1364)     | 88 (50, 139)     | 356 (100, 838)   | 6 (3, 12)     | 6 (2, 13)    | 447 (195, 944)     | 1.6 (1.0, 2.4) | 6.1 (2.2, 12.0) | 0.1 (0.0, 0.2) | 0.0 (0.0, 0.1) | 0.3 (0.1, 0.6) |
| Ages 45 to 64             | 1130000  | 0.3 (0.2, 0.3) | 27.8 (25.7, 29.9) | 315 (188, 483)    | 1078 (370, 2330)   | 57 (31, 96)     | 38 (13, 77)    | 1482 (741, 2739)    | 280 (167, 430)   | 944 (329, 2071)  | 51 (27, 85)   | 32 (12, 69)  | 1317 (659, 2434)   | 0.6 (0.3, 0.9) | 3.2 (1.2, 6.2)  | 0.1 (0.0, 0.1) | 0.1 (0.0, 0.1) | 0.4 (0.2, 0.7) |
| Ages 65 and older         | 618000   | 0.2 (0.2, 0.3) | 27.0 (24.4, 29.6) | 387 (231, 574)    | 1156 (426, 2235)   | 58 (31, 94)     | 20 (7, 41)     | 1620 (847, 2730)    | 626 (320, 929)   | 1156 (690, 3637) | 95 (50, 152)  | 32 (12, 66)  | 2622 (1371, 4418)  | 0.3 (0.2, 0.4) | 2.4 (0.9, 4.5)  | 0.1 (0.0, 0.1) | 0.1 (0.0, 0.1) | 0.3 (0.2, 0.6) |
| Men overall               | 3190000  | 0.4 (0.3, 0.5) | 26.6 (24.5, 28.8) | 829 (491, 1259)   | 2730 (941, 5777)   | 125 (66, 206)   | 64 (23, 137)   | 3748 (1700, 6833)   | 260 (154, 395)   | 856 (295, 1812)  | 39 (21, 65)   | 20 (7, 43)   | 1176 (587, 2143)   | 0.8 (0.5, 1.2) | 3.9 (1.4, 7.6)  | 0.1 (0.0, 0.1) | 0.0 (0.0, 0.1) | 0.3 (0.2, 0.6) |
| <b>Both sexes overall</b> | 6600000  | 0.4 (0.3, 0.5) | 26.3 (23.6, 29.6) | 1630 (822, 5921)  | 4854 (1649, 10790) | 279 (137, 803)  | 196 (67, 630)  | 6959 (3286, 17128)  | 246 (124, 893)   | 732 (249, 1627)  | 42 (21, 121)  | 30 (10, 95)  | 1049 (496, 2583)   | 1.0 (0.5, 2.5) | 3.3 (1.2, 6.6)  | 0.1 (0.0, 0.3) | 0.1 (0.0, 0.2) | 0.3 (0.1, 0.7) |
| <b>Azerbaijan</b>         |          |                |                   |                   |                    |                 |                |                     |                  |                  |               |              |                    |                |                 |                |                |                |
| <b>Women</b>              |          |                |                   |                   |                    |                 |                |                     |                  |                  |               |              |                    |                |                 |                |                |                |
| Ages 20 to 44             | 1910000  | 0.1 (0.0, 0.2) | 25.7 (24.8, 26.5) | 47 (10, 109)      | 174 (47, 476)      | 5 (1, 14)       | 4 (1, 12)      | 230 (84, 537)       | 24 (5, 57)       | 91 (24, 249)     | 3 (1, 7)      | 2 (0, 6)     | 120 (44, 281)      | 0.2 (0.1, 0.5) | 0.7 (0.2, 1.7)  | 0.0 (0.0, 0.1) | 0.0 (0.0, 0.0) | 0.1 (0.0, 0.2) |
| Ages 45 to 64             | 1050000  | 0.0 (0.0, 0.1) | 29.8 (28.4, 31.7) | 39 (14, 122)      | 285 (88, 740)      | 6 (2, 17)       | 13 (3, 37)     | 340 (128, 795)      | 37 (13, 117)     | 272 (84, 708)    | 5 (2, 16)     | 10 (3, 35)   | 325 (123, 760)     | 0.1 (0.0, 0.2) | 1.0 (0.3, 2.1)  | 0.0 (0.0, 0.0) | 0.0 (0.0, 0.1) | 0.1 (0.0, 0.2) |
| Ages 65 and older         | 354000   | 0.0 (0.0, 0.1) | 28.8 (25.2, 32.4) | 50 (12, 64)       | 139 (43, 346)      | 2 (0, 3)        | 5 (1, 8)       | 199 (70, 388)       | 141 (34, 180)    | 393 (121, 977)   | 5 (1, 9)      | 13 (3, 21)   | 553 (199, 1097)    | 0.0 (0.0, 0.0) | 0.8 (0.3, 1.8)  | 0.0 (0.0, 0.0) | 0.0 (0.0, 0.0) | 0.1 (0.0, 0.1) |
| Women overall             | 3310000  | 0.1 (0.0, 0.1) | 27.9 (25.3, 30.0) | 136 (36, 294)     | 597 (177, 1562)    | 13 (5, 35)      | 17 (5, 56)     | 765 (282, 1760)     | 41 (11, 89)      | 180 (53, 472)    | 4 (1, 9)      | 6 (1, 17)    | 231 (85, 519)      | 0.1 (0.0, 0.2) | 0.8 (0.3, 1.8)  | 0.0 (0.0, 0.0) | 0.0 (0.0, 0.0) | 0.1 (0.0, 0.2) |
| <b>Men</b>                |          |                |                   |                   |                    |                 |                |                     |                  |                  |               |              |                    |                |                 |                |                |                |
| Ages 20 to 44             | 1850000  | 0.1 (0.0, 0.2) | 25.0 (24.3, 25.8) | 133 (31, 285)     | 213 (56, 547)      | 4 (1, 10)       | 3 (0, 7)       | 352 (130, 733)      | 72 (17, 154)     | 115 (30, 295)    | 2 (0, 5)      | 1 (0, 4)     | 190 (75, 386)      | 0.3 (0.1, 0.6) | 1.4 (0.4, 3.2)  | 0.0 (0.0, 0.0) | 0.0 (0.0, 0.0) | 0.1 (0.0, 0.2) |
| Ages 45 to 64             | 950000   | 0.1 (0.0, 0.1) | 26.8 (25.9, 27.8) | 114 (38, 356)     | 305 (89, 768)      | 5 (1, 15)       | 7 (2, 24)      | 431 (172, 928)      | 10 (40, 375)     | 420 (494, 808)   | 5 (1, 16)     | 8 (2, 25)    | 454 (181, 977)     | 0.1 (0.0, 0.2) | 1.1 (0.3, 2.2)  | 0.0 (0.0, 0.0) | 0.0 (0.0, 0.1) | 0.1 (0.0, 0.2) |
| Ages 65 and older         | 249000   | 0.0 (0.0, 0.1) | 26.0 (24.2, 27.8) | 48 (16, 80)       | 116 (34, 279)      | 2 (0, 4)        | 2 (0, 3)       | 168 (69, 333)       | 195 (62, 323)    | 466 (135, 1121)  | 7 (2, 15)     | 7 (2, 13)    | 676 (276, 1338)    | 0.0 (0.0, 0.1) | 0.7 (0.2, 1.5)  | 0.0 (0.0, 0.0) | 0.0 (0.0, 0.0) | 0.1 (0.0, 0.1) |
| Men overall               | 3050000  | 0.1 (0.1, 0.2) | 25.8 (24.6, 27.1) | 295 (85, 721)     | 634 (179, 1593)    | 11 (3, 28)      | 12 (3, 35)     | 952 (379, 1974)     | 102 (59, 523)    | 426 (159, 523)   | 4 (1, 9)      | 4 (1, 11)    | 312 (124, 647)     | 0.1 (0.0, 0.3) | 1.0 (0.3, 2.3)  | 0.0 (0.0, 0.0) | 0.0 (0.0, 0.0) | 0.1 (0.0, 0.2) |
| <b>Both sexes overall</b> | 6360000  | 0.1 (0.0, 0.1) | 26.9 (25.2, 28.5) | 431 (120, 1016)   | 1231 (356, 3155)   | 24 (6, 63)      | 31 (7, 91)     | 1717 (662, 3693)    | 68 (19, 160)     | 194 (56, 496)    | 4 (1, 10)     | 5 (1, 14)    | 270 (104, 581)     | 0.1 (0.0, 0.3) | 0.9 (0.3, 2.1)  | 0.0 (0.0, 0.0) | 0.0 (0.0, 0.0) | 0.1 (0.0, 0.2) |
| <b>Bahamas</b>            |          |                |                   |                   |                    |                 |                |                     |                  |                  |               |              |                    |                |                 |                |                |                |
| <b>Women</b>              |          |                |                   |                   |                    |                 |                |                     |                  |                  |               |              |                    |                |                 |                |                |                |
| Ages 20 to 44             | 68500    | 0.9 (0.3, 1.6) | 27.7 (23.9, 31.5) | 30 (13, 58)       | 78 (24, 181)       | 6 (2, 12)</     |                |                     |                  |                  |               |              |                    |                |                 |                |                |                |

|                           |         |                |                   |                    |                  |                |                    |                    |                   |                 |              |                  |                    |                |                |                |                |                |
|---------------------------|---------|----------------|-------------------|--------------------|------------------|----------------|--------------------|--------------------|-------------------|-----------------|--------------|------------------|--------------------|----------------|----------------|----------------|----------------|----------------|
| Agens 45 to 64            | 1430000 | 0.1 (0.0, 0.2) | 28.3 (24.5, 32.1) | 439 (192, 742)     | 650 (195, 1518)  | 62 (28, 109)   | 93 (30, 187)       | 1245 (630, 2211)   | 308 (134, 520)    | 456 (136, 1064) | 44 (20, 76)  | 65 (21, 131)     | 872 (442, 1550)    | 0.3 (0.2, 0.6) | 2.3 (0.8, 4.7) | 0.1 (0.0, 0.1) | 0.1 (0.0, 0.2) | 0.2 (0.1, 0.4) |
| Agens 65 and older        | 900000  | 0.1 (0.0, 0.2) | 26.7 (21.1, 32.3) | 2660 (207, 21992)  | 585 (170, 1446)  | 30 (9, 604)    | 162 (11, 1274)     | 3497 (613, 24639)  | 2955 (230, 24431) | 650 (189, 1607) | 99 (10, 671) | 180 (12, 1616)   | 3884 (681, 27371)  | 0.5 (0.0, 3.6) | 2.0 (0.7, 4.2) | 0.1 (0.0, 0.1) | 0.3 (0.2, 0.2) | 0.4 (0.1, 2.7) |
| Women overall             | 4150000 | 0.2 (0.1, 0.3) | 26.7 (22.2, 31.3) | 1582 (456, 23459)  | 170 (44, 774)    | 73 (48, 1502)  | 5276 (1472, 28651) | 783 (110, 5647)    | 680 (112, 916)    | 111 (12, 866)   | 41 (11, 186) | 1270 (354, 6803) | 0.6 (0.2, 3.5)     | 2.1 (0.7, 4.4) | 0.1 (0.0, 0.5) | 0.1 (0.0, 0.9) | 0.3 (0.1, 1.2) |                |
| <b>Men</b>                |         |                |                   |                    |                  |                |                    |                    |                   |                 |              |                  |                    |                |                |                |                |                |
| Agens 20 to 44            | 1830000 | 0.3 (0.1, 0.5) | 25.5 (22.9, 28.2) | 624 (294, 1125)    | 644 (120, 1145)  | 13 (5, 27)     | 10 (4, 24)         | 1080 (562, 1913)   | 341 (161, 615)    | 237 (66, 626)   | 7 (3, 15)    | 6 (2, 13)        | 591 (308, 1046)    | 1.0 (0.5, 1.7) | 4.0 (1.3, 9.2) | 0.0 (0.0, 0.1) | 0.0 (0.0, 0.1) | 0.2 (0.1, 0.3) |
| Agens 45 to 64            | 1200000 | 0.2 (0.0, 0.3) | 27.3 (24.4, 30.3) | 1413 (676, 2533)   | 434 (182, 1750)  | 75 (31, 143)   | 49 (16, 111)       | 2180 (1162, 3751)  | 1181 (565, 2134)  | 538 (152, 1462) | 63 (26, 119) | 41 (14, 93)      | 1822 (959, 3135)   | 0.4 (0.2, 0.7) | 2.3 (0.7, 5.4) | 0.0 (0.0, 0.1) | 0.1 (0.0, 0.2) | 0.2 (0.1, 0.4) |
| Agens 65 and older        | 414000  | 0.1 (0.0, 0.2) | 26.1 (22.7, 29.5) | 890 (199, 5354)    | 291 (82, 791)    | 39 (9, 180)    | 20 (3, 20)         | 1240 (428, 6074)   | 2150 (480, 12934) | 703 (199, 1911) | 94 (22, 435) | 48 (7, 291)      | 2996 (1033, 14676) | 0.3 (0.1, 1.7) | 1.4 (0.4, 3.3) | 0.1 (0.0, 0.4) | 0.1 (0.0, 0.6) | 0.2 (0.1, 1.2) |
| Men overall               | 3440000 | 0.2 (0.1, 0.3) | 26.2 (23.2, 29.5) | 1368 (385, 3685)   | 127 (45, 350)    | 79 (24, 255)   | 4500 (2137, 11738) | 851 (340, 2626)    | 398 (112, 1072)   | 37 (13, 102)    | 23 (7, 74)   | 1309 (621, 3413) | 0.5 (0.2, 1.4)     | 2.6 (0.8, 6.0) | 0.0 (0.0, 0.2) | 0.1 (0.0, 0.3) | 0.2 (0.1, 0.6) |                |
| <b>Both sexes overall</b> | 7590000 | 0.2 (0.1, 0.3) | 26.4 (22.7, 30.2) | 6177 (1627, 32490) | 2950 (850, 7490) | 297 (85, 1123) | 352 (71, 1757)     | 9776 (3609, 39999) | 814 (214, 4279)   | 389 (112, 986)  | 39 (12, 148) | 46 (9, 231)      | 1288 (475, 5268)   | 0.6 (0.2, 2.4) | 2.3 (0.8, 5.2) | 0.1 (0.0, 0.4) | 0.1 (0.0, 0.6) | 0.2 (0.1, 0.9) |

## Belgium

|                           |         |                |                   |                   |                    |                |                |                     |                 |                  |                |              |                   |                |                 |                |                |                |
|---------------------------|---------|----------------|-------------------|-------------------|--------------------|----------------|----------------|---------------------|-----------------|------------------|----------------|--------------|-------------------|----------------|-----------------|----------------|----------------|----------------|
| Agens 20 to 44            | 1760000 | 1.1 (0.9, 1.3) | 23.4 (21.9, 24.9) | 168 (86, 459)     | 557 (167, 1387)    | 22 (2, 92)     | 25 (10, 54)    | 792 (357, 1738)     | 95 (49, 260)    | 316 (94, 787)    | 24 (13, 52)    | 14 (6, 31)   | 449 (202, 986)    | 2.6 (1.3, 8.4) | 3.4 (1.2, 7.3)  | 0.3 (0.1, 0.7) | 0.0 (0.0, 0.1) | 0.3 (0.2, 0.7) |
| Agens 45 to 64            | 1460000 | 0.5 (0.4, 0.6) | 27.0 (25.0, 29.0) | 341 (205, 442)    | 1125 (368, 2622)   | 143 (92, 208)  | 118 (48, 267)  | 1693 (904, 3227)    | 210 (105, 413)  | 768 (263, 1791)  | 98 (63, 142)   | 81 (33, 169) | 415 (617, 2203)   | 0.8 (0.5, 1.1) | 4.8 (2.0, 8.5)  | 0.1 (0.0, 0.2) | 0.1 (0.0, 0.2) | 0.4 (0.2, 0.8) |
| Agens 65 and older        | 1080000 | 0.4 (0.3, 0.4) | 27.7 (25.1, 30.3) | 720 (485, 938)    | 1877 (757, 3844)   | 142 (89, 204)  | 89 (37, 180)   | 2828 (1628, 4818)   | 665 (448, 867)  | 1735 (699, 3552) | 311 (82, 189)  | 82 (34, 166) | 2613 (1505, 4510) | 0.4 (0.3, 0.6) | 4.6 (2.1, 7.9)  | 0.1 (0.0, 0.2) | 0.1 (0.0, 0.2) | 0.4 (0.2, 0.7) |
| Women overall             | 4310000 | 0.7 (0.5, 0.8) | 25.9 (23.9, 27.9) | 1195 (776, 1841)  | 3559 (1309, 7853)  | 326 (204, 504) | 232 (95, 481)  | 5123 (2889, 9847)   | 277 (180, 427)  | 826 (304, 1822)  | 76 (47, 117)   | 54 (22, 112) | 1233 (670, 2984)  | 1.3 (0.7, 3.4) | 4.3 (1.8, 7.9)  | 0.2 (0.1, 0.4) | 0.1 (0.0, 0.2) | 0.4 (0.2, 0.7) |
| <b>Men</b>                |         |                |                   |                   |                    |                |                |                     |                 |                  |                |              |                   |                |                 |                |                |                |
| Agens 20 to 44            | 1790000 | 1.3 (1.0, 1.5) | 25.6 (24.4, 26.8) | 256 (168, 371)    | 780 (259, 1897)    | 24 (13, 42)    | 16 (7, 33)     | 1077 (524, 2195)    | 143 (94, 208)   | 436 (145, 1060)  | 14 (7, 23)     | 9 (4, 18)    | 602 (304, 1227)   | 2.4 (1.7, 3.2) | 8.9 (3.6, 16.2) | 0.1 (0.1, 0.3) | 0.0 (0.0, 0.1) | 0.4 (0.2, 0.8) |
| Agens 45 to 64            | 1460000 | 0.5 (0.4, 0.6) | 28.3 (26.8, 29.8) | 733 (506, 995)    | 1659 (607, 3703)   | 154 (92, 234)  | 75 (32, 149)   | 2622 (1505, 4717)   | 501 (346, 680)  | 1135 (415, 2532) | 305 (63, 160)  | 51 (22, 102) | 1799 (1029, 3225) | 0.9 (0.6, 1.2) | 4.9 (2.0, 9.0)  | 0.1 (0.1, 0.2) | 0.1 (0.0, 0.2) | 0.5 (0.3, 0.9) |
| Agens 65 and older        | 791000  | 0.4 (0.3, 0.5) | 27.3 (25.5, 29.1) | 732 (527, 975)    | 1524 (584, 3101)   | 133 (83, 194)  | 39 (16, 77)    | 2428 (1451, 4089)   | 625 (666, 1233) | 1927 (738, 3920) | 168 (105, 246) | 49 (21, 97)  | 3069 (1833, 5168) | 0.4 (0.3, 0.6) | 3.1 (1.5, 5.7)  | 0.1 (0.1, 0.1) | 0.1 (0.0, 0.2) | 0.4 (0.2, 0.6) |
| Men overall               | 4040000 | 0.7 (0.6, 0.9) | 26.3 (25.4, 28.4) | 1722 (1201, 2341) | 3963 (1450, 8701)  | 311 (188, 470) | 130 (65, 259)  | 6127 (3500, 11001)  | 426 (297, 579)  | 980 (358, 2152)  | 77 (46, 116)   | 32 (14, 64)  | 1516 (866, 2721)  | 1.2 (0.9, 1.7) | 5.6 (2.3, 10.3) | 0.1 (0.1, 0.2) | 0.1 (0.0, 0.2) | 0.4 (0.2, 0.8) |
| <b>Both sexes overall</b> | 8350000 | 0.7 (0.6, 0.9) | 26.4 (24.7, 28.2) | 2916 (1977, 4183) | 7522 (2759, 16554) | 638 (392, 974) | 362 (150, 740) | 11439 (6388, 20848) | 349 (237, 501)  | 901 (330, 1982)  | 76 (47, 117)   | 43 (18, 89)  | 1370 (765, 2496)  | 1.3 (0.8, 2.5) | 5.0 (2.0, 9.1)  | 0.1 (0.1, 0.3) | 0.1 (0.0, 0.2) | 0.4 (0.2, 0.7) |

## Belize

|                           |        |                |                   |               |                 |            |            |                 |                   |                     |                |                |                     |                 |                  |                |                |                |
|---------------------------|--------|----------------|-------------------|---------------|-----------------|------------|------------|-----------------|-------------------|---------------------|----------------|----------------|---------------------|-----------------|------------------|----------------|----------------|----------------|
| Agens 20 to 44            | 57900  | 2.3 (0.6, 4.0) | 29.4 (28.0, 30.8) | 23 (10, 43)   | 102 (34, 225)   | 4 (1, 8)   | 3 (1, 6)   | 131 (60, 254)   | 390 (179, 742)    | 1762 (589, 3881)    | 64 (24, 146)   | 51 (19, 109)   | 2267 (1041, 4384)   | 5.7 (2.9, 9.7)  | 9.7 (3.5, 19.1)  | 0.6 (0.2, 1.3) | 0.4 (0.1, 0.7) | 1.1 (0.5, 2.1) |
| Agens 45 to 64            | 19400  | 1.1 (0.3, 1.9) | 31.4 (29.9, 32.9) | 25 (12, 45)   | 152 (53, 312)   | 5 (2, 10)  | 8 (3, 17)  | 189 (88, 351)   | 1267 (626, 2291)  | 7816 (2752, 16066)  | 243 (96, 590)  | 420 (152, 891) | 9745 (4507, 18083)  | 2.5 (1.3, 4.3)  | 12.8 (4.8, 23.7) | 0.5 (0.2, 1.0) | 0.9 (0.3, 1.9) | 2.5 (1.2, 4.5) |
| Agens 65 and older        | 6530   | 0.8 (0.1, 0.4) | 26.9 (25.4, 28.4) | 20 (10, 34)   | 121 (42, 236)   | 3 (1, 6)   | 3 (1, 5)   | 146 (65, 263)   | 3043 (1538, 5260) | 18501 (6414, 36206) | 452 (188, 926) | 394 (147, 827) | 22390 (9956, 40336) | 1.2 (0.6, 2.1)  | 11.0 (4.0, 20.6) | 0.4 (0.2, 0.8) | 0.7 (0.3, 1.4) | 2.5 (1.1, 4.4) |
| Women overall             | 83900  | 1.4 (0.4, 2.5) | 28.9 (27.5, 30.4) | 67 (33, 122)  | 375 (129, 773)  | 11 (5, 24) | 14 (5, 29) | 467 (213, 868)  | 960 (388, 1453)   | 4467 (1543, 9220)   | 136 (54, 291)  | 163 (60, 346)  | 5566 (2538, 10357)  | 3.1 (1.6, 5.3)  | 11.2 (4.1, 21.1) | 0.5 (0.2, 1.0) | 0.7 (0.2, 1.3) | 2.0 (0.9, 3.7) |
| <b>Men</b>                |        |                |                   |               |                 |            |            |                 |                   |                     |                |                |                     |                 |                  |                |                |                |
| Agens 20 to 44            | 58300  | 2.5 (0.7, 4.2) | 26.9 (25.8, 28.0) | 10 (5, 56)    | 101 (34, 221)   | 2 (0, 5)   | 2 (1, 5)   | 135 (65, 258)   | 523 (250, 958)    | 1730 (591, 3783)    | 33 (8, 85)     | 35 (13, 79)    | 2320 (1109, 4415)   | 6.5 (3.3, 11.1) | 13.9 (5.2, 26.7) | 0.4 (0.1, 0.9) | 0.3 (0.1, 0.8) | 0.8 (0.4, 1.5) |
| Agens 45 to 64            | 18900  | 1.2 (0.3, 2.0) | 27.7 (26.6, 28.9) | 41 (21, 73)   | 148 (55, 310)   | 2 (1, 5)   | 5 (2, 13)  | 197 (98, 357)   | 2163 (1083, 3864) | 7816 (2918, 16385)  | 328 (137, 277) | 288 (103, 666) | 10394 (5180, 18839) | 2.8 (1.4, 4.8)  | 13.2 (5.6, 24.8) | 0.2 (0.1, 0.5) | 0.8 (0.3, 1.9) | 2.0 (1.0, 3.6) |
| Agens 65 and older        | 5800   | 0.9 (0.2, 1.5) | 25.3 (24.2, 26.5) | 23 (12, 41)   | 83 (32, 172)    | 2 (1, 4)   | 2 (1, 4)   | 114 (54, 199)   | 4028 (2005, 6992) | 14524 (5447, 29718) | 124 (50, 274)  | 67 (30, 118)   | 19109 (9377, 34294) | 1.3 (0.7, 2.3)  | 9.9 (4.2, 19.0)  | 0.2 (0.1, 0.4) | 0.6 (0.2, 1.5) | 1.8 (0.9, 3.2) |
| Men overall               | 83100  | 1.6 (0.5, 2.7) | 26.5 (25.4, 27.7) | 9 (6, 14)     | 303 (121, 703)  | 6 (2, 14)  | 9 (3, 21)  | 941 (427, 2043) | 4141 (567, 2042)  | 1400 (1460, 8467)   | 72 (21, 164)   | 109 (39, 250)  | 5333 (2614, 9789)   | 3.5 (1.8, 6.1)  | 12.3 (5.0, 23.5) | 0.3 (0.1, 0.6) | 0.6 (0.2, 1.4) | 1.5 (0.8, 2.8) |
| <b>Both sexes overall</b> | 167000 | 1.5 (0.4, 2.6) | 27.7 (26.4, 29.0) | 162 (80, 291) | 708 (251, 1477) | 17 (6, 38) | 23 (8, 50) | 910 (420, 1812) | 970 (477, 2426)   | 4240 (1502, 8465)   | 104 (38, 228)  | 136 (49, 298)  | 5450 (2576, 10074)  | 3.3 (1.7, 5.7)  | 11.7 (4.5, 22.3) | 0.4 (0.1, 0.8) | 0.6 (0.2, 1.4) | 1.8 (0.8, 3.2) |

## Benin

|                           |         |                |                   |                 |                 |              |               |                   |                  |                 |              |                 |                   |                 |                |                |                |                |
|---------------------------|---------|----------------|-------------------|-----------------|-----------------|--------------|---------------|-------------------|------------------|-----------------|--------------|-----------------|-------------------|-----------------|----------------|----------------|----------------|----------------|
| Agens 20 to 44            | 1460000 | 0.3 (0.1, 0.5) | 23.4 (22.8, 24.1) | 48 (14, 94)     | 95 (32, 225)    | 3 (1, 5)     | 5 (2, 12)     | 151 (67, 293)     | 33 (10, 65)      | 65 (22, 154)    | 4 (1, 8)     | 104 (46, 201)   | 0.4 (0.1, 0.7)    | 0.5 (0.2, 1.0)  | 0.0 (0.0, 0.0) | 0.0 (0.0, 0.1) | 0.0 (0.0, 0.1) |                |
| Agens 45 to 64            | 464000  | 0.1 (0.0, 0.2) | 24.7 (23.7, 25.6) | 35 (8, 85)      | 111 (41, 247)   | 3 (1, 7)     | 12 (3, 24)    | 160 (65, 305)     | 7 (16, 183)      | 240 (88, 532)   | 2 (0, 4)     | 26 (5, 73)      | 346 (140, 658)    | 0.1 (0.0, 0.3)  | 0.7 (0.3, 1.5) | 0.0 (0.0, 0.0) | 0.1 (0.0, 0.1) | 0.1 (0.0, 0.1) |
| Agens 65 and older        | 162000  | 0.1 (0.0, 0.2) | 22.1 (19.2, 25.0) | 380 (5, 2559)   | 104 (28, 297)   | 60 (1, 478)  | 50 (1, 112)   | 559 (43, 3329)    | 2352 (34, 15820) | 644 (176, 1836) | 91 (1, 694)  | 371 (4, 2953)   | 3459 (267, 20580) | 1.2 (0.6, 0.9)  | 0.9 (0.3, 2.6) | 0.0 (0.0, 0.3) | 0.8 (0.4, 0.6) | 0.4 (0.2, 2.2) |
| Women overall             | 2090000 | 0.2 (0.1, 0.3) | 23.3 (23.7, 24.8) | 463 (27, 2738)  | 311 (101, 769)  | 20 (10, 125) | 74 (4, 524)   | 871 (175, 3927)   | 222 (13, 1313)   | 149 (49, 369)   | 10 (1, 60)   | 418 (84, 1883)  | 0.6 (0.1, 2.7)    | 0.7 (0.2, 1.7)  | 0.1 (0.0, 0.4) | 0.3 (0.1, 0.6) | 0.2 (0.0, 0.8) |                |
| <b>Men</b>                |         |                |                   |                 |                 |              |               |                   |                  |                 |              |                 |                   |                 |                |                |                |                |
| Agens 20 to 44            | 1430000 | 0.3 (0.1, 0.5) | 22.2 (21.4, 22.9) | 352 (25, 2172)  | 113 (34, 262)   | 11 (1, 70)   | 12 (1, 30)    | 488 (88, 2491)    | 247 (17, 1521)   | 79 (24, 183)    | 8 (0, 49)    | 8 (1, 91)       | 341 (62, 1745)    | 2.2 (0.2, 11.6) | 1.0 (0.3, 2.3) | 0.1 (0.0, 0.6) | 0.1 (0.0, 0.8) | 0.1 (0.0, 0.7) |
| Agens 45 to 64            | 416000  | 0.1 (0.0, 0.2) | 23.0 (22.2, 23.8) | 144 (45, 351)   | 148 (55, 310)   | 13 (0, 38)   | 14 (3, 49)    | 485 (70, 3897)    | 686 (25, 7320)   | 347 (107, 844)  | 3 (0, 13)    | 302 (3, 1186)   | 1167 (191, 9367)  | 0.8 (0.0, 8.3)  | 1.0 (0.3, 2.4) | 0.1 (0.0, 0.8) | 0.3 (0.0, 3.3) | 0.2 (0.1, 0.6) |
| Agens 65 and older        | 107000  | 0.1 (0.0, 0.2) | 21.9 (20.1, 23.6) | 499 (4, 1801)   | 87 (22, 214)    | 19 (0, 78)   | 51 (0, 226)   | 656 (35, 2172)    | 4658 (41, 16810) | 810 (204, 1995) | 179 (1, 730) | 473 (3, 2114)   | 6121 (328, 20276) | 1.9 (0.0, 6.2)  | 0.9 (0.2, 2.1) | 0.2 (0.0, 0.9) | 1.0 (0.4, 2.2) | 0.5 (0.0, 1.7) |
| Men overall               | 1950000 | 0.2 (0.1, 0.3) | 23.3 (23.1, 23.4) | 1137 (40, 7018) | 944 (101, 827)  | 43 (1, 287)  | 106 (3, 850)  | 1629 (203, 8561)  | 176 (52, 424)    | 162 (12, 147)   | 54 (1, 436)  | 835 (104, 4387) | 1.6 (0.1, 8.7)    | 1.0 (0.3, 2.3)  | 0.1 (0.0, 0.7) | 0.5 (0.0, 2.8) | 0.3 (0.0, 1.3) |                |
| <b>Both sexes overall</b> | 4040000 | 0.2 (0.1, 0.3) | 22.8 (21.4, 24.1) | 1600 (67, 9756) | 654 (202, 1596) | 62 (3, 411)  | 183 (7, 1374) | 2500 (377, 12487) | 396 (17, 2417)   | 1177 (450, 395) | 15 (1, 102)  | 45 (2, 340)     | 619 (93, 3093)    | 1.1 (0.1, 5.7)  | 0.8 (0.3, 2.0) | 0.1 (0.0, 0.6) |                |                |

SSB-attributable deaths per million adults

Women aged 20–44

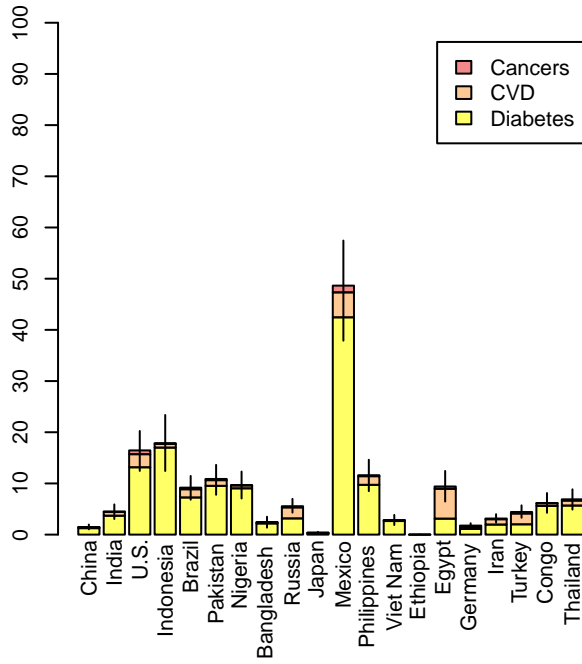

Women aged 45–64

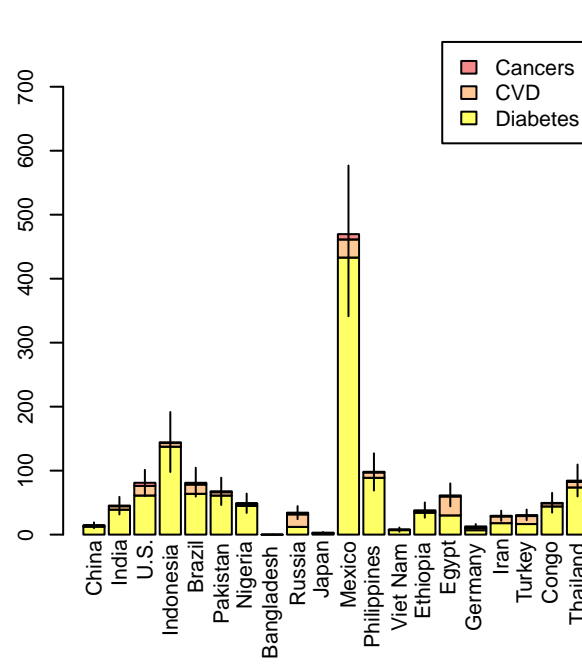

Women aged 65 and over

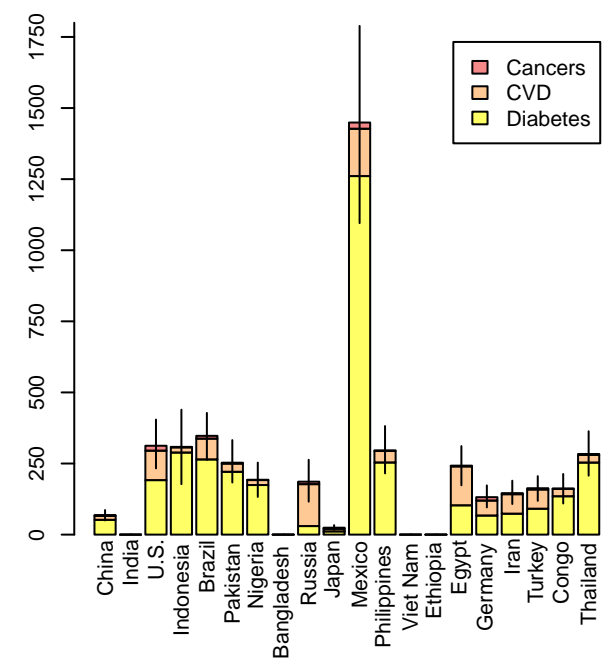

Men aged 20–44

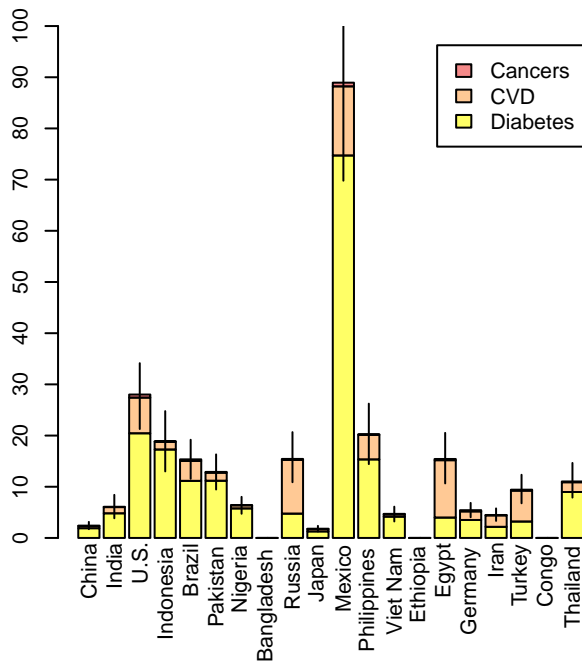

Men aged 45–64

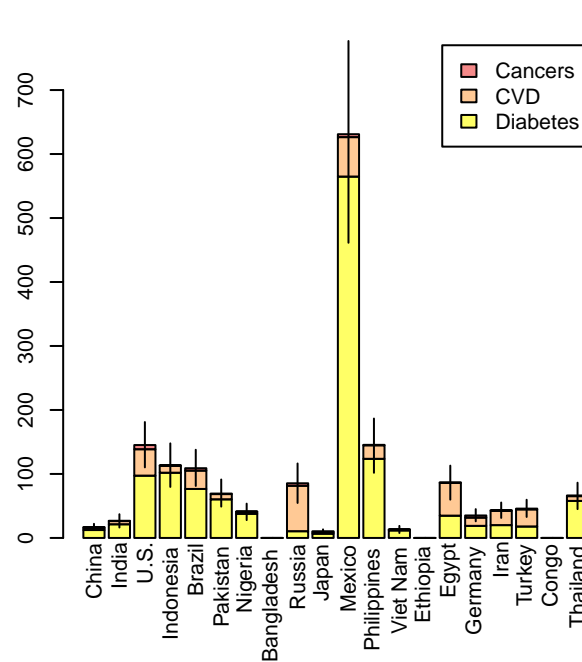

Men aged 65 and over

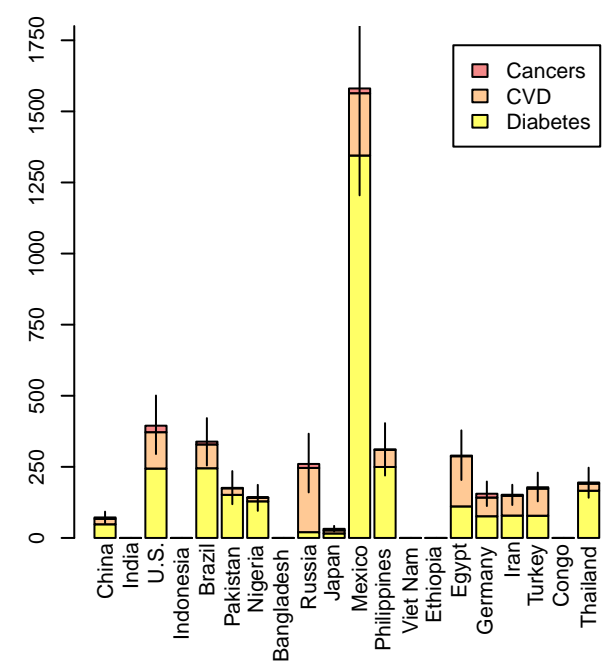

Supplement: NIHMS703112-supplement-Supplemental_Material.pdf [file NIHMS703112-supplement-Supplemental_Material.pdf]
